# Supplementary material for: Camouflage strategies interfere differently with observer search images
Source: Proc Biol Sci. 2018 Sep 5;285(1886):20181386. doi: 10.1098/rspb.2018.1386 (PMC6158535; doi:10.1098/rspb.2018.1386)
Supplement: Full data for each experiment [file rspb20181386supp1.xlsx]

## Sheet: Exp A Disruptive BM data
Participant	slide	mothTreatment	hit	time	timeTo20	edgeDist	learningTreatment	inverted	trialPhase	searchTreatment	testTreatment	phaseInc	phaseSlide	ClickX	ClickY	TargetX	TargetY	backgroundID
1	1	A	1	10737	10737	158	A-A	light	learning	A	A	learning	1	218	389	158	376	22
1	2	B	1	11937	11937	64	A-A	light	learning	A	A	learning	2	1428	111	1375	64	51
1	3	A	1	4997	4997	506	A-A	light	learning	A	A	learning	3	1410	544	1347	506	6
1	4	B	1	1132	1132	236	A-A	light	learning	A	A	learning	4	745	271	666	236	16
1	5	B	1	1420	1420	116	A-A	light	learning	A	A	learning	5	567	146	506	116	23
1	6	B	0	NA	20000	268	A-A	light	learning	A	A	learning	6	NA	NA	1625	268	55
1	7	A	1	3001	3001	346	A-A	light	learning	A	A	learning	7	765	782	708	734	5
1	8	A	1	4644	4644	158	A-A	light	learning	A	A	learning	8	750	189	681	158	7
1	9	B	1	5250	5250	325	A-A	light	learning	A	A	learning	9	1139	797	1063	755	43
1	10	A	1	2629	2629	162	A-A	light	learning	A	A	learning	10	323	200	267	162	21
1	11	A	1	1899	1899	90	A-A	light	learning	A	A	learning	11	394	141	300	90	56
1	12	B	1	1846	1846	255	A-A	light	learning	A	A	learning	12	337	369	255	338	17
1	13	A	1	1239	1239	361	A-A	light	learning	A	A	learning	13	749	409	696	361	2
1	14	B	1	4278	4278	218	A-A	light	learning	A	A	learning	14	1278	222	1237	218	41
1	15	B	1	1149	1149	538	A-A	light	learning	A	A	learning	15	737	586	696	542	26
1	16	A	1	2078	2078	135	A-A	light	learning	A	A	learning	16	729	985	660	945	11
1	17	A	1	3104	3104	187	A-A	light	learning	A	A	learning	17	619	928	519	893	8
1	18	B	1	3085	3085	255	A-A	light	learning	A	A	learning	18	1345	308	1278	255	36
1	19	B	1	1744	1744	282	A-A	light	learning	A	A	learning	19	1214	333	1147	282	1
1	20	A	1	1337	1337	269	A-A	light	learning	A	A	learning	20	1715	752	1651	721	57
1	21	A	1	3723	3723	300	A-A	light	learning	A	A	learning	21	704	821	621	780	52
1	22	A	1	2733	2733	305	A-A	light	learning	A	A	learning	22	477	799	423	775	9
1	23	B	1	1485	1485	291	A-A	light	learning	A	A	learning	23	370	648	291	610	3
1	24	B	1	1688	1688	271	A-A	light	learning	A	A	learning	24	1716	661	1649	643	37
1	25	B	1	1939	1939	252	A-A	light	learning	A	A	learning	25	1488	857	1441	828	34
1	26	B	1	1790	1790	496	A-A	light	learning	A	A	learning	26	1356	565	1286	496	54
1	27	A	1	3026	3026	241	A-A	light	learning	A	A	learning	27	564	859	496	839	27
1	28	A	1	1117	1117	179	A-A	light	learning	A	A	learning	28	805	218	742	179	30
1	29	A	1	2814	2814	94	A-A	light	learning	A	A	learning	29	1366	138	1294	94	53
1	30	A	1	3971	3971	286	A-A	light	learning	A	A	learning	30	1688	745	1634	700	46
1	31	B	1	1742	1742	431	A-A	light	learning	A	A	learning	31	1421	476	1352	431	39
1	32	B	1	3255	3255	146	A-A	light	learning	A	A	learning	32	207	405	146	397	28
1	33	A	1	3489	3489	88	A-A	light	search	A	A	searchA	1	960	137	917	88	53
1	34	A	1	1677	1677	452	A-A	light	search	A	A	searchA	2	1546	618	1468	581	25
1	35	A	1	2197	2197	346	A-A	light	search	A	A	searchA	3	1290	383	1250	346	18
1	36	A	1	2351	2351	167	A-A	light	search	A	A	searchA	4	1594	192	1547	167	29
1	37	A	1	1009	1009	205	A-A	light	search	A	A	searchA	5	875	246	824	205	7
1	38	A	1	7671	7671	394	A-A	light	search	A	A	searchA	6	895	694	836	686	42
1	39	A	1	3212	3212	148	A-A	light	search	A	A	searchA	7	522	191	454	148	11
1	40	A	1	3794	3794	435	A-A	light	search	A	A	searchA	8	1148	692	1099	645	2
1	41	A	1	2339	2339	149	A-A	light	search	A	A	searchA	9	1279	983	1238	931	5
1	42	A	1	1334	1334	524	A-A	light	search	A	A	searchA	10	1338	543	1266	524	45
1	43	A	1	1439	1439	478	A-A	light	search	A	A	searchA	11	582	655	523	602	4
1	44	A	1	3328	3328	224	A-A	light	search	A	A	searchA	12	365	258	296	224	30
1	45	A	1	1358	1358	490	A-A	light	search	A	A	searchA	13	1247	525	1175	490	41
1	46	A	1	3455	3455	312	A-A	light	search	A	A	searchA	14	1680	365	1608	327	55
1	47	A	1	1274	1274	136	A-A	light	search	A	A	searchA	15	1429	181	1354	136	40
1	48	A	1	6190	6190	233	A-A	light	search	A	A	searchA	16	1734	241	1663	233	6
1	49	A	1	5930	5930	132	A-A	light	test	A	A	testA-A	1	1356	990	1296	948	40
1	50	A	1	3047	3047	379	A-A	light	test	A	A	testA-A	2	447	558	379	541	34
1	51	A	1	5146	5146	393	A-A	light	test	A	A	testA-A	3	964	725	914	687	50
1	52	A	1	1686	1686	294	A-A	light	test	A	A	testA-A	4	360	650	294	617	37
1	53	A	1	6374	6374	279	A-A	light	test	A	A	testA-A	5	1515	865	1454	801	20
1	54	A	1	1530	1530	483	A-A	light	test	A	A	testA-A	6	561	633	498	597	56
1	55	A	1	1160	1160	283	A-A	light	test	A	A	testA-A	7	1542	813	1503	797	55
1	56	A	1	8003	8003	83	A-A	light	test	A	A	testA-A	8	1693	140	1663	83	23
1	57	A	1	2296	2296	237	A-A	light	test	A	A	testA-A	9	349	252	281	237	48
1	58	A	1	1724	1724	188	A-A	light	test	A	A	testA-A	10	279	785	188	753	12
1	59	A	1	4336	4336	67	A-A	light	test	A	A	testA-A	11	1264	91	1201	67	46
1	60	A	1	1597	1597	465	A-A	light	test	A	A	testA-A	12	1159	654	1097	615	25
1	61	A	1	6037	6037	391	A-A	light	test	A	A	testA-A	13	1139	420	1106	391	19
1	62	A	1	1253	1253	467	A-A	light	test	A	A	testA-A	14	1375	625	1318	613	57
1	63	A	1	1761	1761	525	A-A	light	test	A	A	testA-A	15	625	557	551	525	38
1	64	A	1	2190	2190	134	A-A	light	test	A	A	testA-A	16	851	995	795	946	26
2	2	B	1	2250	2250	367	A-A	dark	learning	A	A	learning	2	455.422	776.719	406	713	5
2	4	A	1	2544	2544	248	A-A	dark	learning	A	A	learning	4	837.776	295.273	760	248	23
2	5	B	1	7336	7336	90	A-A	dark	learning	A	A	learning	5	1311.21	118.109	1275	90	9
2	6	B	1	2241	2241	149	A-A	dark	learning	A	A	learning	6	861.798	944.875	784	931	12
2	7	A	1	2152	2152	303	A-A	dark	learning	A	A	learning	7	539.5	850.788	465	777	33
2	8	A	0	NA	20000	271	A-A	dark	learning	A	A	learning	8	NA	NA	271	457	32
2	9	A	1	3263	3263	513	A-A	dark	learning	A	A	learning	9	1385.28	584.541	1327	513	46
2	10	B	1	11361	11361	90	A-A	dark	learning	A	A	learning	10	1109.03	115.107	1058	90	49
2	11	A	1	1247	1247	188	A-A	dark	learning	A	A	learning	11	274.254	431.399	188	396	27
2	12	B	1	1643	1643	317	A-A	dark	learning	A	A	learning	12	703.652	787.729	648	763	4
2	13	B	1	1605	1605	218	A-A	dark	learning	A	A	learning	13	1614.49	250.232	1560	218	47
2	14	A	1	6524	6524	267	A-A	dark	learning	A	A	learning	14	1698.57	542.502	1653	486	28
2	15	A	1	14731	14731	451	A-A	dark	learning	A	A	learning	15	1508.4	635.588	1469	597	44
2	16	B	1	2627	2627	363	A-A	dark	learning	A	A	learning	16	1353.25	742.688	1275	717	7
2	17	A	1	2038	2038	303	A-A	dark	learning	A	A	learning	17	1245.15	806.747	1162	777	18
2	18	B	1	2696	2696	274	A-A	dark	learning	A	A	learning	18	1712.59	402.373	1646	347	51
2	19	B	1	1220	1220	306	A-A	dark	learning	A	A	learning	19	431.399	357.331	341	306	43
2	20	A	1	2878	2878	252	A-A	dark	learning	A	A	learning	20	323.299	713.661	252	680	48
2	21	A	1	1504	1504	291	A-A	dark	learning	A	A	learning	21	1286.19	297.275	1218	291	14
2	22	B	1	2344	2344	159	A-A	dark	learning	A	A	learning	22	1079	172.159	1012	159	3
2	23	A	1	10167	10167	117	A-A	dark	learning	A	A	learning	23	1283.19	148.137	1221	117	26
2	24	B	1	1335	1335	203	A-A	dark	learning	A	A	learning	24	514.476	221.205	448	203	56
2	25	A	1	12034	12034	286	A-A	dark	learning	A	A	learning	25	591.548	308.285	547	286	42
2	26	B	1	1357	1357	214	A-A	dark	learning	A	A	learning	26	309.286	302.28	214	275	54
2	27	B	1	1343	1343	402	A-A	dark	learning	A	A	learning	27	474.439	423.392	426	402	13
2	28	A	1	1384	1384	360	A-A	dark	learning	A	A	learning	28	529.49	760.704	486	720	24
2	29	B	1	1681	1681	166	A-A	dark	learning	A	A	learning	29	1097.02	174.161	1022	166	34
2	30	B	1	2696	2696	299	A-A	dark	learning	A	A	learning	30	980.908	829.768	909	781	35
2	31	A	1	3665	3665	255	A-A	dark	learning	A	A	learning	31	892.827	850.788	829	825	45
2	32	A	1	1365	1365	498	A-A	dark	learning	A	A	learning	32	882.817	544.504	823	498	29
2	33	A	1	1780	1780	221	A-A	dark	search	A	A	searchA	1	302.28	720.667	221	687	7
2	34	A	1	1582	1582	471	A-A	dark	search	A	A	searchA	2	1208.12	630.584	1136	609	30
2	35	A	1	5006	5006	186	A-A	dark	search	A	A	searchA	3	254.235	528.489	186	471	18
2	36	A	1	1883	1883	327	A-A	dark	search	A	A	searchA	4	1555.44	365.338	1503	327	55
2	37	A	1	2270	2270	452	A-A	dark	search	A	A	searchA	5	586.543	666.617	513	628	45
2	38	A	1	3080	3080	202	A-A	dark	search	A	A	searchA	6	374.347	229.212	304	202	21
2	39	A	1	2457	2457	310	A-A	dark	search	A	A	searchA	7	1055.98	807.748	990	770	33
2	40	A	1	9551	9551	295	A-A	dark	search	A	A	searchA	8	1025.95	334.31	963	295	32
2	41	A	1	960	960	523	A-A	dark	search	A	A	searchA	9	921.854	558.517	870	523	4
2	42	A	1	1489	1489	374	A-A	dark	search	A	A	searchA	10	473.438	746.691	400	706	48
2	43	A	1	5842	5842	183	A-A	dark	search	A	A	searchA	11	610.565	201.186	568	183	38
2	44	A	1	1827	1827	341	A-A	dark	search	A	A	searchA	12	1043.97	365.338	976	341	25
2	45	A	1	3796	3796	289	A-A	dark	search	A	A	searchA	13	1317.22	818.758	1261	791	46
2	46	A	1	4290	4290	217	A-A	dark	search	A	A	searchA	14	1075	902.836	1017	863	35
2	47	A	1	2481	2481	224	A-A	dark	search	A	A	searchA	15	846.784	241.223	777	224	51
2	48	A	1	2102	2102	260	A-A	dark	search	A	A	searchA	16	1705.58	586.543	1660	550	47
2	49	A	1	1252	1252	497	A-A	dark	test	A	A	testA-A	1	667.618	541.501	585	497	32
2	50	A	1	2856	2856	190	A-A	dark	test	A	A	testA-A	2	1655.53	216.2	1598	190	49
2	51	A	1	4565	4565	453	A-A	dark	test	A	A	testA-A	3	1491.38	661.613	1436	627	44
2	52	A	1	16808	16808	151	A-A	dark	test	A	A	testA-A	4	230.213	968.897	151	929	57
2	53	A	1	2513	2513	254	A-A	dark	test	A	A	testA-A	5	317.294	661.613	254	630	54
2	54	A	1	3617	3617	267	A-A	dark	test	A	A	testA-A	6	1632.51	292.271	1569	267	34
2	55	A	1	8885	8885	108	A-A	dark	test	A	A	testA-A	7	711.659	153.142	641	108	4
2	56	A	1	1554	1554	416	A-A	dark	test	A	A	testA-A	8	812.753	693.642	737	664	35
2	57	A	1	1991	1991	374	A-A	dark	test	A	A	testA-A	9	1388.29	741.687	1335	706	25
2	58	A	1	3947	3947	168	A-A	dark	test	A	A	testA-A	10	235.218	657.609	168	653	33
2	59	A	1	1341	1341	460	A-A	dark	test	A	A	testA-A	11	866.803	673.624	795	620	38
2	60	A	1	1780	1780	440	A-A	dark	test	A	A	testA-A	12	1542.43	646.599	1480	590	14
2	61	A	1	2315	2315	170	A-A	dark	test	A	A	testA-A	13	484.449	180.167	405	170	8
2	62	A	1	1943	1943	455	A-A	dark	test	A	A	testA-A	14	1371.27	498.462	1312	455	47
2	63	A	1	3250	3250	330	A-A	dark	test	A	A	testA-A	15	1173.09	799.74	1117	750	40
2	64	A	1	3031	3031	412	A-A	dark	test	A	A	testA-A	16	1475.37	439.407	1398	412	20
3	1	B	1	1298	1298	203	A-A	light	learning	A	A	learning	1	461.427	220.204	395	203	39
3	2	B	1	2539	2539	254	A-A	light	learning	A	A	learning	2	330.306	711.659	254	682	7
3	3	A	1	9210	9210	409	A-A	light	learning	A	A	learning	3	1329.23	467.433	1294	409	34
3	4	A	1	2684	2684	288	A-A	light	learning	A	A	learning	4	1038.96	312.289	995	288	55
3	5	A	0	NA	20000	88	A-A	light	learning	A	A	learning	5	NA	NA	1458	88	19
3	6	B	1	1824	1824	196	A-A	light	learning	A	A	learning	6	1025.95	938.869	955	884	23
3	7	A	1	19990	19990	248	A-A	light	learning	A	A	learning	7	1148.06	845.783	1077	832	10
3	8	B	1	1673	1673	236	A-A	light	learning	A	A	learning	8	251.233	835.774	236	803	26
3	9	A	1	2160	2160	176	A-A	light	learning	A	A	learning	9	205.19	291.27	176	250	6
3	10	A	1	7646	7646	381	A-A	light	learning	A	A	learning	10	444.411	526.487	381	493	18
3	11	B	1	2622	2622	420	A-A	light	learning	A	A	learning	11	993.92	487.451	959	420	25
3	12	B	1	1290	1290	150	A-A	light	learning	A	A	learning	12	1043.97	969.898	1000	930	44
3	13	A	1	2083	2083	144	A-A	light	learning	A	A	learning	13	983.911	991.918	920	936	50
3	14	B	1	8038	8038	153	A-A	light	learning	A	A	learning	14	1269.18	965.894	1220	927	33
3	15	A	0	NA	20000	269	A-A	light	learning	A	A	learning	15	NA	NA	1450	811	40
3	16	B	1	1094	1094	367	A-A	light	learning	A	A	learning	16	1087.01	740.686	987	713	54
3	17	A	1	10250	10250	136	A-A	light	learning	A	A	learning	17	144.133	357.331	136	312	45
3	18	A	1	2015	2015	402	A-A	light	learning	A	A	learning	18	722.669	715.663	692	678	43
3	19	B	1	1004	1004	129	A-A	light	learning	A	A	learning	19	417.387	166.154	376	129	21
3	20	B	1	1341	1341	342	A-A	light	learning	A	A	learning	20	494.458	419.388	454	342	29
3	21	B	1	1480	1480	138	A-A	light	learning	A	A	learning	21	222.206	998.925	179	942	52
3	22	B	1	4586	4586	368	A-A	light	learning	A	A	learning	22	886.821	756.701	847	712	11
3	23	A	1	2133	2133	295	A-A	light	learning	A	A	learning	23	1379.28	845.783	1333	785	22
3	24	A	1	1090	1090	369	A-A	light	learning	A	A	learning	24	569.527	428.397	513	369	5
3	25	B	1	1493	1493	172	A-A	light	learning	A	A	learning	25	847.785	914.847	786	908	1
3	26	A	1	1508	1508	145	A-A	light	learning	A	A	learning	26	645.598	184.171	621	145	14
3	27	A	1	1903	1903	360	A-A	light	learning	A	A	learning	27	937.868	772.716	903	720	31
3	28	B	1	3816	3816	190	A-A	light	learning	A	A	learning	28	1326.23	218.202	1293	190	41
3	29	A	1	1000	1000	241	A-A	light	learning	A	A	learning	29	636.589	283.262	580	241	49
3	30	A	1	1994	1994	182	A-A	light	learning	A	A	learning	30	620.575	964.893	578	898	17
3	31	B	1	3149	3149	389	A-A	light	learning	A	A	learning	31	1144.06	725.672	1085	691	46
3	32	B	1	2624	2624	237	A-A	light	learning	A	A	learning	32	364.337	287.266	290	237	13
3	33	A	1	2552	2552	85	A-A	light	search	A	A	searchA	1	1343.24	169.157	1299	85	14
3	34	A	1	917	917	139	A-A	light	search	A	A	searchA	2	874.81	183.17	806	139	50
3	35	A	1	1905	1905	440	A-A	light	search	A	A	searchA	3	1317.22	680.63	1268	640	23
3	36	A	1	1568	1568	151	A-A	light	search	A	A	searchA	4	882.817	201.186	816	151	4
3	37	A	1	4658	4658	284	A-A	light	search	A	A	searchA	5	1653.53	784.727	1636	747	45
3	38	A	1	2864	2864	343	A-A	light	search	A	A	searchA	6	578.536	386.358	529	343	24
3	39	A	1	2872	2872	348	A-A	light	search	A	A	searchA	7	1595.48	399.37	1552	348	11
3	40	A	1	1246	1246	467	A-A	light	search	A	A	searchA	8	810.751	656.608	774	613	15
3	41	A	1	2356	2356	354	A-A	light	search	A	A	searchA	9	380.352	566.525	354	558	21
3	42	A	1	16128	16128	189	A-A	light	search	A	A	searchA	10	753.698	239.221	705	189	12
3	43	A	1	3284	3284	166	A-A	light	search	A	A	searchA	11	316.293	200.185	272	166	32
3	44	A	1	1397	1397	235	A-A	light	search	A	A	searchA	12	297.275	753.698	235	672	35
3	45	A	1	1910	1910	370	A-A	light	search	A	A	searchA	13	1055.98	405.375	994	370	43
3	46	A	1	1758	1758	115	A-A	light	search	A	A	searchA	14	498.462	150.139	448	115	34
3	47	A	1	1787	1787	511	A-A	light	search	A	A	searchA	15	1394.29	572.53	1342	511	33
3	48	A	1	1084	1084	337	A-A	light	search	A	A	searchA	16	382.354	482.447	337	453	30
3	49	A	1	3507	3507	166	A-A	light	test	A	A	testA-A	1	1594.48	948.879	1568	914	7
3	50	A	1	6117	6117	254	A-A	light	test	A	A	testA-A	2	1718.59	506.469	1666	484	42
3	51	A	1	1812	1812	236	A-A	light	test	A	A	testA-A	3	1255.16	885.82	1166	844	18
3	52	A	1	1280	1280	365	A-A	light	test	A	A	testA-A	4	397.368	690.639	365	661	55
3	53	A	0	NA	20000	141	A-A	light	test	A	A	testA-A	5	NA	NA	903	939	10
3	54	A	1	2566	2566	313	A-A	light	test	A	A	testA-A	6	1239.15	804.745	1163	767	17
3	55	A	1	2119	2119	270	A-A	light	test	A	A	testA-A	7	861.798	858.795	798	810	13
3	56	A	1	3310	3310	242	A-A	light	test	A	A	testA-A	8	250.232	277.257	242	277	35
3	57	A	1	11785	11785	318	A-A	light	test	A	A	testA-A	9	1188.1	800.741	1153	762	41
3	58	A	1	1110	1110	405	A-A	light	test	A	A	testA-A	10	836.775	428.397	800	405	25
3	59	A	1	2069	2069	255	A-A	light	test	A	A	testA-A	11	1584.47	294.272	1536	255	46
3	60	A	1	1093	1093	364	A-A	light	test	A	A	testA-A	12	674.625	388.36	640	364	40
3	61	A	1	4119	4119	213	A-A	light	test	A	A	testA-A	13	403.373	929.861	377	867	19
3	62	A	1	1209	1209	319	A-A	light	test	A	A	testA-A	14	373.346	449.416	319	447	14
3	63	A	1	1874	1874	363	A-A	light	test	A	A	testA-A	15	1181.09	445.412	1115	363	56
3	64	A	1	2166	2166	407	A-A	light	test	A	A	testA-A	16	1019.94	719.666	983	673	30
4	1	B	1	11858	11858	287	A-A	dark	learning	A	A	learning	1	1446	848	1386	793	52
4	2	A	1	3111	3111	218	A-A	dark	learning	A	A	learning	2	640	236	558	218	17
4	3	B	1	2779	2779	432	A-A	dark	learning	A	A	learning	3	503	524	432	491	30
4	4	A	1	2499	2499	366	A-A	dark	learning	A	A	learning	4	1408	410	1339	366	22
4	5	B	1	1079	1079	461	A-A	dark	learning	A	A	learning	5	895	504	840	461	46
4	6	B	1	777	777	497	A-A	dark	learning	A	A	learning	6	1123	535	1053	497	5
4	7	A	1	3494	3494	140	A-A	dark	learning	A	A	learning	7	776	171	696	140	11
4	8	A	1	2104	2104	178	A-A	dark	learning	A	A	learning	8	1114	950	1055	902	47
4	9	A	1	991	991	531	A-A	dark	learning	A	A	learning	9	916	565	873	531	3
4	10	B	1	2973	2973	413	A-A	dark	learning	A	A	learning	10	1552	495	1507	449	23
4	11	B	1	1347	1347	230	A-A	dark	learning	A	A	learning	11	790	276	705	230	14
4	12	A	1	2158	2158	154	A-A	dark	learning	A	A	learning	12	487	950	428	926	43
4	13	A	1	6451	6451	356	A-A	dark	learning	A	A	learning	13	1494	782	1394	724	54
4	14	B	1	900	900	349	A-A	dark	learning	A	A	learning	14	806	399	736	349	13
4	15	A	1	4582	4582	446	A-A	dark	learning	A	A	learning	15	1330	681	1248	634	48
4	16	B	1	13833	13833	135	A-A	dark	learning	A	A	learning	16	213	575	135	532	42
4	17	B	1	3996	3996	294	A-A	dark	learning	A	A	learning	17	1550	328	1508	294	10
4	18	A	1	1635	1635	272	A-A	dark	learning	A	A	learning	18	1227	851	1157	808	16
4	19	B	1	979	979	294	A-A	dark	learning	A	A	learning	19	367	473	294	429	31
4	20	A	1	2040	2040	497	A-A	dark	learning	A	A	learning	20	1110	555	1012	497	9
4	21	A	1	4579	4579	272	A-A	dark	learning	A	A	learning	21	1680	849	1619	808	53
4	22	B	1	1520	1520	254	A-A	dark	learning	A	A	learning	22	1452	855	1386	826	40
4	23	A	1	16820	16820	70	A-A	dark	learning	A	A	learning	23	1454	125	1394	70	44
4	24	B	1	1059	1059	295	A-A	dark	learning	A	A	learning	24	529	344	462	295	15
4	25	B	1	1388	1388	406	A-A	dark	learning	A	A	learning	25	518	426	477	406	50
4	26	A	1	1111	1111	371	A-A	dark	learning	A	A	learning	26	788	409	706	371	36
4	27	A	1	7521	7521	438	A-A	dark	learning	A	A	learning	27	1449	464	1377	438	49
4	28	B	1	1746	1746	215	A-A	dark	learning	A	A	learning	28	1067	938	995	865	39
4	29	B	1	2516	2516	312	A-A	dark	learning	A	A	learning	29	383	722	312	686	21
4	30	A	0	NA	20000	193	A-A	dark	learning	A	A	learning	30	NA	NA	1375	193	6
4	31	A	1	1137	1137	365	A-A	dark	learning	A	A	learning	31	923	408	856	365	51
4	32	B	1	7540	7540	143	A-A	dark	learning	A	A	learning	32	690	197	618	143	29
4	33	A	1	4351	4351	277	A-A	dark	search	A	A	searchA	1	1649	844	1589	803	22
4	34	A	1	2949	2949	211	A-A	dark	search	A	A	searchA	2	1126	229	1078	211	46
4	35	A	1	2154	2154	284	A-A	dark	search	A	A	searchA	3	344	842	284	784	18
4	36	A	0	NA	20000	223	A-A	dark	search	A	A	searchA	4	NA	NA	347	857	28
4	37	A	1	18451	18451	170	A-A	dark	search	A	A	searchA	5	1148	947	1100	910	13
4	38	A	1	2443	2443	338	A-A	dark	search	A	A	searchA	6	1514	396	1459	338	47
4	39	A	1	1507	1507	276	A-A	dark	search	A	A	searchA	7	316	599	276	570	39
4	40	A	1	4933	4933	382	A-A	dark	search	A	A	searchA	8	1559	428	1509	382	29
4	41	A	1	5180	5180	301	A-A	dark	search	A	A	searchA	9	624	816	550	779	24
4	42	A	1	7532	7532	392	A-A	dark	search	A	A	searchA	10	769	737	688	688	23
4	43	A	0	NA	20000	159	A-A	dark	search	A	A	searchA	11	NA	NA	1579	921	20
4	44	A	1	4081	4081	324	A-A	dark	search	A	A	searchA	12	1168	380	1105	324	4
4	45	A	1	6603	6603	252	A-A	dark	search	A	A	searchA	13	1736	317	1668	265	27
4	46	A	1	3431	3431	290	A-A	dark	search	A	A	searchA	14	1512	320	1425	290	35
4	47	A	1	1545	1545	166	A-A	dark	search	A	A	searchA	15	519	951	462	914	54
4	48	A	1	1505	1505	424	A-A	dark	search	A	A	searchA	16	899	448	811	424	44
4	49	A	1	3059	3059	294	A-A	dark	test	A	A	testA-A	1	369	540	294	484	57
4	50	A	1	3649	3649	332	A-A	dark	test	A	A	testA-A	2	1393	794	1331	748	7
4	51	A	0	NA	20000	328	A-A	dark	test	A	A	testA-A	3	NA	NA	1592	507	23
4	52	A	1	5070	5070	267	A-A	dark	test	A	A	testA-A	4	646	327	569	267	17
4	53	A	1	2341	2341	535	A-A	dark	test	A	A	testA-A	5	736	594	669	535	48
4	54	A	1	1248	1248	438	A-A	dark	test	A	A	testA-A	6	550	471	447	438	4
4	55	A	1	7743	7743	199	A-A	dark	test	A	A	testA-A	7	523	228	454	199	20
4	56	A	1	7112	7112	220	A-A	dark	test	A	A	testA-A	8	630	909	556	860	13
4	57	A	1	3983	3983	303	A-A	dark	test	A	A	testA-A	9	1464	359	1404	303	51
4	58	A	1	3751	3751	280	A-A	dark	test	A	A	testA-A	10	1432	322	1358	280	33
4	59	A	1	2042	2042	365	A-A	dark	test	A	A	testA-A	11	438	670	365	633	18
4	60	A	1	2653	2653	356	A-A	dark	test	A	A	testA-A	12	641	397	546	356	47
4	61	A	1	2261	2261	312	A-A	dark	test	A	A	testA-A	13	1126	339	1074	312	30
4	62	A	1	3035	3035	174	A-A	dark	test	A	A	testA-A	14	257	901	174	863	41
4	63	A	1	8105	8105	275	A-A	dark	test	A	A	testA-A	15	1708	485	1645	434	2
4	64	A	1	2033	2033	499	A-A	dark	test	A	A	testA-A	16	980	636	902	581	45
5	1	B	0	NA	20000	392	A-A	light	learning	A	A	learning	1	NA	NA	1508	392	55
5	2	A	1	9925	9925	75	A-A	light	learning	A	A	learning	2	1691	119	1621	75	38
5	3	B	1	4649	4649	265	A-A	light	learning	A	A	learning	3	1715	745	1655	702	20
5	4	A	1	2711	2711	258	A-A	light	learning	A	A	learning	4	1675	867	1619	822	47
5	5	A	1	2200	2200	416	A-A	light	learning	A	A	learning	5	1447	710	1379	664	48
5	6	B	1	1583	1583	334	A-A	light	learning	A	A	learning	6	1394	381	1312	334	6
5	7	B	1	1745	1745	337	A-A	light	learning	A	A	learning	7	671	371	601	337	23
5	8	A	1	5754	5754	79	A-A	light	learning	A	A	learning	8	1621	157	1537	79	29
5	9	B	1	1140	1140	84	A-A	light	learning	A	A	learning	9	1401	133	1324	84	16
5	10	B	1	8473	8473	154	A-A	light	learning	A	A	learning	10	216	912	154	885	50
5	11	A	1	1588	1588	238	A-A	light	learning	A	A	learning	11	1391	286	1347	238	5
5	12	A	1	5522	5522	165	A-A	light	learning	A	A	learning	12	1310	962	1255	915	46
5	13	A	1	3969	3969	169	A-A	light	learning	A	A	learning	13	216	180	169	170	22
5	14	B	1	4047	4047	392	A-A	light	learning	A	A	learning	14	1595	661	1528	631	39
5	15	A	1	3272	3272	311	A-A	light	learning	A	A	learning	15	375	524	311	468	10
5	16	B	1	2529	2529	231	A-A	light	learning	A	A	learning	16	399	285	325	231	4
5	17	A	1	2087	2087	428	A-A	light	learning	A	A	learning	17	1546	636	1492	610	54
5	18	B	1	4172	4172	534	A-A	light	learning	A	A	learning	18	666	593	607	546	51
5	19	B	1	2762	2762	144	A-A	light	learning	A	A	learning	19	435	198	372	144	32
5	20	A	1	1423	1423	263	A-A	light	learning	A	A	learning	20	746	308	657	263	26
5	21	A	0	NA	20000	173	A-A	light	learning	A	A	learning	21	NA	NA	613	907	3
5	22	B	1	4758	4758	192	A-A	light	learning	A	A	learning	22	287	934	218	888	9
5	23	A	1	6964	6964	448	A-A	light	learning	A	A	learning	23	762	671	688	632	12
5	24	B	1	1199	1199	325	A-A	light	learning	A	A	learning	24	372	682	325	645	18
5	25	A	1	1072	1072	386	A-A	light	learning	A	A	learning	25	458	619	386	579	25
5	26	B	1	1689	1689	261	A-A	light	learning	A	A	learning	26	658	889	568	819	57
5	27	A	1	1890	1890	524	A-A	light	learning	A	A	learning	27	711	629	634	556	31
5	28	B	1	2186	2186	330	A-A	light	learning	A	A	learning	28	718	801	652	750	2
5	29	A	1	2695	2695	348	A-A	light	learning	A	A	learning	29	1282	766	1234	732	56
5	30	B	1	5612	5612	230	A-A	light	learning	A	A	learning	30	1586	265	1559	230	17
5	31	A	1	2538	2538	265	A-A	light	learning	A	A	learning	31	325	802	265	763	30
5	32	B	0	NA	20000	424	A-A	light	learning	A	A	learning	32	NA	NA	424	546	41
5	33	A	1	2981	2981	291	A-A	light	search	A	A	searchA	1	1489	844	1404	789	16
5	34	A	1	2213	2213	308	A-A	light	search	A	A	searchA	2	1655	418	1612	373	4
5	35	A	1	1694	1694	481	A-A	light	search	A	A	searchA	3	951	532	869	481	56
5	36	A	1	1142	1142	534	A-A	light	search	A	A	searchA	4	867	576	788	546	8
5	37	A	1	2829	2829	245	A-A	light	search	A	A	searchA	5	315	812	245	791	18
5	38	A	1	1548	1548	179	A-A	light	search	A	A	searchA	6	383	942	318	901	1
5	39	A	1	2089	2089	486	A-A	light	search	A	A	searchA	7	1260	628	1204	594	14
5	40	A	1	2087	2087	219	A-A	light	search	A	A	searchA	8	1346	266	1293	219	40
5	41	A	1	2236	2236	368	A-A	light	search	A	A	searchA	9	433	471	368	399	13
5	42	A	1	2720	2720	367	A-A	light	search	A	A	searchA	10	465	754	367	707	33
5	43	A	1	1163	1163	374	A-A	light	search	A	A	searchA	11	766	410	670	374	17
5	44	A	1	1518	1518	308	A-A	light	search	A	A	searchA	12	1702	669	1612	591	26
5	45	A	1	8046	8046	145	A-A	light	search	A	A	searchA	13	1210	191	1117	145	3
5	46	A	1	10761	10761	287	A-A	light	search	A	A	searchA	14	1695	413	1633	346	23
5	47	A	1	4797	4797	245	A-A	light	search	A	A	searchA	15	726	851	675	835	44
5	48	A	1	1477	1477	292	A-A	light	search	A	A	searchA	16	573	345	505	292	28
5	49	A	1	2888	2888	211	A-A	light	test	A	A	testA-A	1	1634	277	1579	211	57
5	50	A	1	1291	1291	212	A-A	light	test	A	A	testA-A	2	1432	242	1358	212	16
5	51	A	1	1408	1408	272	A-A	light	test	A	A	testA-A	3	372	523	272	487	22
5	52	A	1	1200	1200	405	A-A	light	test	A	A	testA-A	4	1101	467	1008	405	42
5	53	A	1	1243	1243	308	A-A	light	test	A	A	testA-A	5	383	534	308	493	15
5	54	A	1	1272	1272	151	A-A	light	test	A	A	testA-A	6	981	201	884	151	43
5	55	A	1	3236	3236	278	A-A	light	test	A	A	testA-A	7	852	824	781	802	7
5	56	A	1	1087	1087	343	A-A	light	test	A	A	testA-A	8	817	406	708	343	39
5	57	A	1	1058	1058	327	A-A	light	test	A	A	testA-A	9	717	365	647	327	44
5	58	A	1	1964	1964	262	A-A	light	test	A	A	testA-A	10	1068	878	983	818	14
5	59	A	1	6319	6319	427	A-A	light	test	A	A	testA-A	11	1518	483	1436	427	12
5	60	A	1	1574	1574	278	A-A	light	test	A	A	testA-A	12	1074	825	994	802	35
5	61	A	1	10445	10445	221	A-A	light	test	A	A	testA-A	13	1640	907	1598	859	19
5	62	A	1	2900	2900	416	A-A	light	test	A	A	testA-A	14	780	686	702	664	27
5	63	A	1	5460	5460	181	A-A	light	test	A	A	testA-A	15	1699	946	1627	899	56
5	64	A	1	6458	6458	432	A-A	light	test	A	A	testA-A	16	504	579	432	535	40
6	1	A	1	15849	15849	87	A-A	dark	learning	A	A	learning	1	1615	119	1551	87	36
6	2	B	1	3764	3764	270	A-A	dark	learning	A	A	learning	2	360	838	285	810	22
6	3	B	1	2000	2000	346	A-A	dark	learning	A	A	learning	3	745	761	684	734	24
6	4	A	1	9925	9925	382	A-A	dark	learning	A	A	learning	4	1125	431	1075	382	13
6	5	B	1	2057	2057	462	A-A	dark	learning	A	A	learning	5	546	669	488	618	12
6	6	A	1	14154	14154	132	A-A	dark	learning	A	A	learning	6	556	991	499	948	44
6	7	A	1	5677	5677	228	A-A	dark	learning	A	A	learning	7	1309	879	1269	852	48
6	8	B	1	7300	7300	227	A-A	dark	learning	A	A	learning	8	310	254	243	227	47
6	9	B	1	1462	1462	399	A-A	dark	learning	A	A	learning	9	911	442	827	399	49
6	10	B	1	1769	1769	237	A-A	dark	learning	A	A	learning	10	439	284	375	237	37
6	11	A	1	1152	1152	312	A-A	dark	learning	A	A	learning	11	1669	678	1608	651	50
6	12	A	1	3523	3523	479	A-A	dark	learning	A	A	learning	12	600	625	535	601	33
6	13	A	1	1347	1347	488	A-A	dark	learning	A	A	learning	13	1149	538	1089	488	2
6	14	A	1	1872	1872	343	A-A	dark	learning	A	A	learning	14	426	646	343	607	16
6	15	B	1	2808	2808	134	A-A	dark	learning	A	A	learning	15	839	181	769	134	4
6	16	B	1	1017	1017	265	A-A	dark	learning	A	A	learning	16	1189	311	1148	265	6
6	17	A	1	1731	1731	329	A-A	dark	learning	A	A	learning	17	400	541	329	504	57
6	18	A	1	4913	4913	134	A-A	dark	learning	A	A	learning	18	222	903	134	882	17
6	19	B	1	2290	2290	306	A-A	dark	learning	A	A	learning	19	1432	342	1377	306	11
6	20	B	1	1597	1597	324	A-A	dark	learning	A	A	learning	20	1648	691	1596	637	56
6	21	B	1	1002	1002	482	A-A	dark	learning	A	A	learning	21	874	516	804	482	28
6	22	A	1	2181	2181	307	A-A	dark	learning	A	A	learning	22	1675	605	1613	569	1
6	23	A	1	6377	6377	309	A-A	dark	learning	A	A	learning	23	1211	781	1129	771	41
6	24	B	1	3566	3566	176	A-A	dark	learning	A	A	learning	24	1267	215	1210	176	3
6	25	A	1	1387	1387	391	A-A	dark	learning	A	A	learning	25	1070	427	1002	391	26
6	26	B	1	1167	1167	374	A-A	dark	learning	A	A	learning	26	1257	390	1215	374	55
6	27	A	1	18589	18589	189	A-A	dark	learning	A	A	learning	27	793	944	710	891	46
6	28	B	1	1370	1370	253	A-A	dark	learning	A	A	learning	28	899	848	834	827	8
6	29	B	1	3431	3431	162	A-A	dark	learning	A	A	learning	29	1322	229	1224	162	27
6	30	A	1	3248	3248	451	A-A	dark	learning	A	A	learning	30	1162	492	1100	451	9
6	31	B	1	3806	3806	137	A-A	dark	learning	A	A	learning	31	1064	187	989	137	32
6	32	A	1	3764	3764	225	A-A	dark	learning	A	A	learning	32	1521	276	1470	225	23
6	33	A	1	5406	5406	465	A-A	dark	search	A	A	searchA	1	652	646	581	615	43
6	34	A	1	14103	14103	203	A-A	dark	search	A	A	searchA	2	1365	243	1289	203	39
6	35	A	1	2312	2312	186	A-A	dark	search	A	A	searchA	3	558	958	497	894	24
6	36	A	1	12808	12808	189	A-A	dark	search	A	A	searchA	4	279	671	189	618	6
6	37	A	1	886	886	523	A-A	dark	search	A	A	searchA	5	880	545	830	523	44
6	38	A	1	1331	1331	320	A-A	dark	search	A	A	searchA	6	1005	363	938	320	15
6	39	A	1	13683	13683	322	A-A	dark	search	A	A	searchA	7	1364	397	1334	322	32
6	40	A	0	NA	20000	225	A-A	dark	search	A	A	searchA	8	NA	NA	1586	855	28
6	41	A	1	5346	5346	380	A-A	dark	search	A	A	searchA	9	1144	736	1094	700	41
6	42	A	1	15815	15815	505	A-A	dark	search	A	A	searchA	10	1016	626	978	575	13
6	43	A	1	2896	2896	159	A-A	dark	search	A	A	searchA	11	965	231	892	159	25
6	44	A	1	1268	1268	484	A-A	dark	search	A	A	searchA	12	847	630	795	596	27
6	45	A	1	985	985	389	A-A	dark	search	A	A	searchA	13	1029	448	981	389	18
6	46	A	1	2392	2392	150	A-A	dark	search	A	A	searchA	14	364	233	282	150	33
6	47	A	1	12880	12880	180	A-A	dark	search	A	A	searchA	15	1668	919	1639	900	9
6	48	A	1	4435	4435	273	A-A	dark	search	A	A	searchA	16	1677	495	1647	451	50
6	49	A	1	2088	2088	318	A-A	dark	test	A	A	testA-A	1	441	379	368	318	32
6	50	A	1	1731	1731	219	A-A	dark	test	A	A	testA-A	2	1515	872	1476	861	15
6	51	A	1	3560	3560	239	A-A	dark	test	A	A	testA-A	3	1230	876	1152	841	26
6	52	A	1	3145	3145	297	A-A	dark	test	A	A	testA-A	4	372	449	297	384	28
6	53	A	0	NA	20000	468	A-A	dark	test	A	A	testA-A	5	NA	NA	1305	468	29
6	54	A	1	5897	5897	261	A-A	dark	test	A	A	testA-A	6	1240	840	1181	819	50
6	55	A	1	10452	10452	416	A-A	dark	test	A	A	testA-A	7	1578	564	1504	541	37
6	56	A	1	3502	3502	191	A-A	dark	test	A	A	testA-A	8	335	240	265	191	22
6	57	A	0	NA	20000	68	A-A	dark	test	A	A	testA-A	9	NA	NA	405	68	17
6	58	A	1	2400	2400	338	A-A	dark	test	A	A	testA-A	10	390	571	338	554	54
6	59	A	1	5890	5890	458	A-A	dark	test	A	A	testA-A	11	872	646	813	622	40
6	60	A	1	2470	2470	402	A-A	dark	test	A	A	testA-A	12	1246	723	1216	678	49
6	61	A	0	NA	20000	270	A-A	dark	test	A	A	testA-A	13	NA	NA	1321	810	3
6	62	A	1	2724	2724	465	A-A	dark	test	A	A	testA-A	14	1075	508	1002	465	27
6	63	A	1	3984	3984	470	A-A	dark	test	A	A	testA-A	15	972	649	909	610	18
6	64	A	1	14152	14152	322	A-A	dark	test	A	A	testA-A	16	1093	815	1036	758	2
7	1	A	1	3515	3515	248	A-A	light	learning	A	A	learning	1	1398	293	1319	248	16
7	2	A	1	4028	4028	382	A-A	light	learning	A	A	learning	2	1541	737	1474	698	4
7	3	B	1	3116	3116	135	A-A	light	learning	A	A	learning	3	1620	171	1579	135	53
7	4	B	1	1701	1701	274	A-A	light	learning	A	A	learning	4	359	605	274	566	19
7	5	B	1	3309	3309	439	A-A	light	learning	A	A	learning	5	1165	689	1089	641	56
7	6	A	1	863	863	322	A-A	light	learning	A	A	learning	6	1032	354	994	322	11
7	7	A	1	13331	13331	169	A-A	light	learning	A	A	learning	7	727	967	648	911	6
7	8	B	1	880	880	494	A-A	light	learning	A	A	learning	8	971	528	899	494	31
7	9	B	1	2271	2271	428	A-A	light	learning	A	A	learning	9	1398	690	1326	652	40
7	10	B	1	2807	2807	533	A-A	light	learning	A	A	learning	10	1172	593	1106	547	38
7	11	A	1	1421	1421	492	A-A	light	learning	A	A	learning	11	1034	611	983	588	1
7	12	A	1	3906	3906	250	A-A	light	learning	A	A	learning	12	1653	844	1572	830	12
7	13	B	1	1947	1947	171	A-A	light	learning	A	A	learning	13	515	959	443	909	2
7	14	A	1	1530	1530	413	A-A	light	learning	A	A	learning	14	975	736	908	667	50
7	15	A	1	1508	1508	361	A-A	light	learning	A	A	learning	15	1038	391	967	361	7
7	16	B	1	1082	1082	523	A-A	light	learning	A	A	learning	16	899	550	867	523	14
7	17	B	1	3122	3122	393	A-A	light	learning	A	A	learning	17	783	710	696	687	44
7	18	A	1	4309	4309	154	A-A	light	learning	A	A	learning	18	1710	945	1643	926	26
7	19	B	1	1031	1031	442	A-A	light	learning	A	A	learning	19	1534	483	1464	442	10
7	20	A	1	2359	2359	158	A-A	light	learning	A	A	learning	20	697	951	624	922	8
7	21	A	1	1852	1852	331	A-A	light	learning	A	A	learning	21	377	738	331	738	5
7	22	B	1	1075	1075	482	A-A	light	learning	A	A	learning	22	573	642	507	598	22
7	23	A	1	4863	4863	288	A-A	light	learning	A	A	learning	23	837	826	778	792	33
7	24	B	1	1495	1495	339	A-A	light	learning	A	A	learning	24	454	402	405	339	28
7	25	A	0	NA	20000	459	A-A	light	learning	A	A	learning	25	NA	NA	1078	459	3
7	26	B	1	1214	1214	265	A-A	light	learning	A	A	learning	26	1179	815	1081	815	15
7	27	B	1	928	928	336	A-A	light	learning	A	A	learning	27	922	381	862	336	35
7	28	A	1	2533	2533	408	A-A	light	learning	A	A	learning	28	1472	462	1390	408	43
7	29	A	1	2112	2112	219	A-A	light	learning	A	A	learning	29	1426	899	1355	861	54
7	30	B	1	1717	1717	393	A-A	light	learning	A	A	learning	30	1483	729	1416	687	9
7	31	B	1	1246	1246	454	A-A	light	learning	A	A	learning	31	822	649	761	626	27
7	32	A	1	3350	3350	136	A-A	light	learning	A	A	learning	32	1164	159	1087	136	17
7	33	A	1	1553	1553	195	A-A	light	search	A	A	searchA	1	356	926	282	885	15
7	34	A	1	2014	2014	316	A-A	light	search	A	A	searchA	2	1570	808	1515	764	49
7	35	A	1	2150	2150	178	A-A	light	search	A	A	searchA	3	255	878	178	831	39
7	36	A	1	1187	1187	82	A-A	light	search	A	A	searchA	4	590	116	510	82	6
7	37	A	1	2106	2106	477	A-A	light	search	A	A	searchA	5	1049	521	1001	477	23
7	38	A	1	1883	1883	374	A-A	light	search	A	A	searchA	6	1615	696	1546	650	4
7	39	A	1	837	837	424	A-A	light	search	A	A	searchA	7	1319	463	1262	424	53
7	40	A	1	1104	1104	438	A-A	light	search	A	A	searchA	8	830	444	775	438	7
7	41	A	1	1207	1207	512	A-A	light	search	A	A	searchA	9	657	615	575	568	52
7	42	A	1	3008	3008	76	A-A	light	search	A	A	searchA	10	1153	106	1079	76	47
7	43	A	1	1324	1324	150	A-A	light	search	A	A	searchA	11	1209	195	1174	150	33
7	44	A	1	18560	18560	324	A-A	light	search	A	A	searchA	12	590	799	510	756	29
7	45	A	1	2112	2112	527	A-A	light	search	A	A	searchA	13	1373	584	1296	527	18
7	46	A	1	2851	2851	248	A-A	light	search	A	A	searchA	14	1673	867	1590	832	37
7	47	A	1	1941	1941	211	A-A	light	search	A	A	searchA	15	1203	921	1139	869	38
7	48	A	1	2160	2160	64	A-A	light	search	A	A	searchA	16	208	87	148	64	3
7	49	A	1	1074	1074	162	A-A	light	test	A	A	testA-A	1	1300	197	1257	162	28
7	50	A	1	1851	1851	201	A-A	light	test	A	A	testA-A	2	1384	918	1303	879	56
7	51	A	1	920	920	87	A-A	light	test	A	A	testA-A	3	1046	133	1016	87	33
7	52	A	1	1641	1641	362	A-A	light	test	A	A	testA-A	4	932	390	876	362	30
7	53	A	1	12363	12363	205	A-A	light	test	A	A	testA-A	5	690	903	602	875	42
7	54	A	1	19047	19047	260	A-A	light	test	A	A	testA-A	6	1121	838	1050	820	25
7	55	A	1	1548	1548	291	A-A	light	test	A	A	testA-A	7	515	328	471	291	46
7	56	A	1	6405	6405	127	A-A	light	test	A	A	testA-A	8	1375	135	1292	127	32
7	57	A	1	909	909	178	A-A	light	test	A	A	testA-A	9	1298	197	1208	178	48
7	58	A	1	1618	1618	298	A-A	light	test	A	A	testA-A	10	477	834	448	782	7
7	59	A	1	1873	1873	427	A-A	light	test	A	A	testA-A	11	1516	680	1450	653	31
7	60	A	1	3336	3336	367	A-A	light	test	A	A	testA-A	12	996	761	931	713	1
7	61	A	1	3148	3148	536	A-A	light	test	A	A	testA-A	13	882	556	826	544	26
7	62	A	1	2484	2484	302	A-A	light	test	A	A	testA-A	14	502	818	453	778	53
7	63	A	1	2174	2174	516	A-A	light	test	A	A	testA-A	15	1480	616	1404	562	44
7	64	A	1	3522	3522	66	A-A	light	test	A	A	testA-A	16	1141	96	1089	66	15
8	1	A	1	6326	6326	298	A-A	dark	learning	A	A	learning	1	406	335	330	298	10
8	2	A	1	1990	1990	179	A-A	dark	learning	A	A	learning	2	1543	239	1487	179	6
8	3	B	1	2730	2730	220	A-A	dark	learning	A	A	learning	3	490	243	435	220	22
8	4	B	1	1727	1727	80	A-A	dark	learning	A	A	learning	4	590	99	543	80	47
8	5	B	1	8414	8414	153	A-A	dark	learning	A	A	learning	5	233	954	154	927	43
8	6	B	1	1070	1070	317	A-A	dark	learning	A	A	learning	6	1058	369	1004	317	51
8	7	A	1	5450	5450	294	A-A	dark	learning	A	A	learning	7	1578	335	1508	294	30
8	8	A	1	12918	12918	463	A-A	dark	learning	A	A	learning	8	962	481	875	463	12
8	9	B	1	3542	3542	377	A-A	dark	learning	A	A	learning	9	439	429	377	408	46
8	10	B	1	1191	1191	366	A-A	dark	learning	A	A	learning	10	1288	386	1221	366	29
8	11	A	1	1347	1347	362	A-A	dark	learning	A	A	learning	11	1333	402	1282	362	57
8	12	A	1	2517	2517	300	A-A	dark	learning	A	A	learning	12	1696	786	1620	735	15
8	13	A	1	7519	7519	243	A-A	dark	learning	A	A	learning	13	1420	871	1349	837	40
8	14	B	1	1675	1675	479	A-A	dark	learning	A	A	learning	14	1329	509	1268	479	48
8	15	B	1	1997	1997	250	A-A	dark	learning	A	A	learning	15	1225	873	1171	830	56
8	16	A	1	1110	1110	485	A-A	dark	learning	A	A	learning	16	961	537	894	485	28
8	17	A	1	1355	1355	230	A-A	dark	learning	A	A	learning	17	674	252	606	230	39
8	18	B	1	1792	1792	273	A-A	dark	learning	A	A	learning	18	1153	256	1099	273	26
8	19	B	1	8040	8040	171	A-A	dark	learning	A	A	learning	19	399	924	340	909	18
8	20	A	1	7362	7362	461	A-A	dark	learning	A	A	learning	20	509	523	461	470	13
8	21	B	1	2243	2243	390	A-A	dark	learning	A	A	learning	21	464	405	421	390	19
8	22	A	1	2114	2114	452	A-A	dark	learning	A	A	learning	22	1179	475	1102	452	23
8	23	A	1	2559	2559	538	A-A	dark	learning	A	A	learning	23	1380	575	1341	542	16
8	24	B	1	2065	2065	290	A-A	dark	learning	A	A	learning	24	453	334	381	290	9
8	25	B	1	5472	5472	235	A-A	dark	learning	A	A	learning	25	609	866	543	845	1
8	26	B	1	2285	2285	265	A-A	dark	learning	A	A	learning	26	358	346	265	309	37
8	27	A	1	1135	1135	225	A-A	dark	learning	A	A	learning	27	322	509	225	477	50
8	28	A	1	2916	2916	205	A-A	dark	learning	A	A	learning	28	1226	940	1168	875	54
8	29	A	1	1769	1769	255	A-A	dark	learning	A	A	learning	29	487	300	410	255	41
8	30	B	1	2300	2300	285	A-A	dark	learning	A	A	learning	30	1530	821	1484	795	32
8	31	B	1	1460	1460	523	A-A	dark	learning	A	A	learning	31	1342	554	1293	523	45
8	32	A	1	3433	3433	211	A-A	dark	learning	A	A	learning	32	647	911	592	869	7
8	33	A	1	999	999	373	A-A	dark	search	A	A	searchA	1	1111	406	1049	373	15
8	34	A	1	1623	1623	427	A-A	dark	search	A	A	searchA	2	1446	693	1407	653	37
8	35	A	1	1689	1689	282	A-A	dark	search	A	A	searchA	3	375	627	282	601	32
8	36	A	1	1253	1253	159	A-A	dark	search	A	A	searchA	4	1097	189	1002	159	31
8	37	A	1	3345	3345	204	A-A	dark	search	A	A	searchA	5	1530	219	1462	204	28
8	38	A	1	1798	1798	86	A-A	dark	search	A	A	searchA	6	1292	131	1240	86	54
8	39	A	1	1379	1379	321	A-A	dark	search	A	A	searchA	7	893	370	822	321	7
8	40	A	1	832	832	285	A-A	dark	search	A	A	searchA	8	785	335	720	285	52
8	41	A	1	931	931	139	A-A	dark	search	A	A	searchA	9	794	192	739	139	50
8	42	A	1	2286	2286	447	A-A	dark	search	A	A	searchA	10	494	510	447	456	46
8	43	A	1	2485	2485	453	A-A	dark	search	A	A	searchA	11	1166	672	1090	627	3
8	44	A	1	2144	2144	379	A-A	dark	search	A	A	searchA	12	1342	739	1312	701	30
8	45	A	1	6929	6929	488	A-A	dark	search	A	A	searchA	13	733	506	696	488	53
8	46	A	1	5265	5265	159	A-A	dark	search	A	A	searchA	14	230	508	159	496	12
8	47	A	1	1388	1388	498	A-A	dark	search	A	A	searchA	15	974	647	922	582	1
8	48	A	1	768	768	356	A-A	dark	search	A	A	searchA	16	839	412	813	356	48
8	49	A	1	4917	4917	83	A-A	dark	test	A	A	testA-A	1	290	156	259	83	38
8	50	A	1	5757	5757	349	A-A	dark	test	A	A	testA-A	2	455	468	349	437	42
8	51	A	1	8538	8538	336	A-A	dark	test	A	A	testA-A	3	1678	572	1584	512	39
8	52	A	1	2582	2582	375	A-A	dark	test	A	A	testA-A	4	439	587	375	544	35
8	53	A	1	9997	9997	425	A-A	dark	test	A	A	testA-A	5	981	689	922	655	19
8	54	A	1	13664	13664	354	A-A	dark	test	A	A	testA-A	6	977	819	896	726	24
8	55	A	1	891	891	201	A-A	dark	test	A	A	testA-A	7	773	243	710	201	41
8	56	A	1	987	987	121	A-A	dark	test	A	A	testA-A	8	398	162	326	121	53
8	57	A	1	1289	1289	194	A-A	dark	test	A	A	testA-A	9	1055	235	1015	194	5
8	58	A	1	1982	1982	501	A-A	dark	test	A	A	testA-A	10	941	536	888	501	27
8	59	A	1	7992	7992	288	A-A	dark	test	A	A	testA-A	11	1431	803	1396	792	47
8	60	A	1	3178	3178	293	A-A	dark	test	A	A	testA-A	12	1505	323	1454	293	25
8	61	A	1	6105	6105	78	A-A	dark	test	A	A	testA-A	13	1277	106	1219	78	37
8	62	A	1	3085	3085	246	A-A	dark	test	A	A	testA-A	14	779	287	705	246	21
8	63	A	1	3846	3846	481	A-A	dark	test	A	A	testA-A	15	934	534	848	481	7
8	64	A	1	2834	2834	257	A-A	dark	test	A	A	testA-A	16	328	855	277	823	20
9	1	B	1	5629	5629	212	A-A	light	learning	A	A	learning	1	1124	911	1052	868	46
9	2	A	1	1958	1958	253	A-A	light	learning	A	A	learning	2	1372	307	1314	253	6
9	3	B	1	1220	1220	389	A-A	light	learning	A	A	learning	3	1182	736	1119	691	13
9	4	A	1	3261	3261	67	A-A	light	learning	A	A	learning	4	521	98	460	67	49
9	5	A	1	3271	3271	84	A-A	light	learning	A	A	learning	5	1039	125	965	84	42
9	6	B	1	11464	11464	347	A-A	light	learning	A	A	learning	6	1085	774	1034	733	40
9	7	A	1	2176	2176	197	A-A	light	learning	A	A	learning	7	272	501	197	481	19
9	8	B	1	1082	1082	199	A-A	light	learning	A	A	learning	8	683	243	600	199	10
9	9	B	1	1258	1258	405	A-A	light	learning	A	A	learning	9	627	711	552	675	30
9	10	A	1	1931	1931	164	A-A	light	learning	A	A	learning	10	239	877	164	836	15
9	11	B	1	1283	1283	185	A-A	light	learning	A	A	learning	11	1109	250	1028	185	2
9	12	A	1	1082	1082	332	A-A	light	learning	A	A	learning	12	501	378	426	332	29
9	13	A	1	1160	1160	195	A-A	light	learning	A	A	learning	13	437	253	374	195	47
9	14	B	1	1219	1219	417	A-A	light	learning	A	A	learning	14	541	459	470	417	14
9	15	B	1	2901	2901	401	A-A	light	learning	A	A	learning	15	949	712	883	679	34
9	16	A	1	1930	1930	313	A-A	light	learning	A	A	learning	16	650	787	572	767	21
9	17	A	1	1591	1591	414	A-A	light	learning	A	A	learning	17	1193	464	1140	414	38
9	18	A	1	1587	1587	262	A-A	light	learning	A	A	learning	18	360	782	262	740	24
9	19	B	1	1434	1434	319	A-A	light	learning	A	A	learning	19	387	779	319	731	48
9	20	B	1	2267	2267	141	A-A	light	learning	A	A	learning	20	1732	981	1663	939	36
9	21	A	1	1545	1545	502	A-A	light	learning	A	A	learning	21	1163	526	1082	502	45
9	22	A	1	2299	2299	251	A-A	light	learning	A	A	learning	22	1601	306	1550	251	51
9	23	B	1	2203	2203	137	A-A	light	learning	A	A	learning	23	1151	162	1085	137	12
9	24	B	1	1147	1147	133	A-A	light	learning	A	A	learning	24	206	454	133	412	35
9	25	A	1	1700	1700	158	A-A	light	learning	A	A	learning	25	1056	217	981	158	27
9	26	A	1	2745	2745	80	A-A	light	learning	A	A	learning	26	997	136	939	80	41
9	27	B	1	1531	1531	116	A-A	light	learning	A	A	learning	27	932	150	860	116	37
9	28	B	1	1461	1461	292	A-A	light	learning	A	A	learning	28	1151	342	1100	292	8
9	29	A	1	4490	4490	364	A-A	light	learning	A	A	learning	29	1599	752	1538	716	44
9	30	B	1	1032	1032	196	A-A	light	learning	A	A	learning	30	506	240	438	196	57
9	31	B	1	1457	1457	388	A-A	light	learning	A	A	learning	31	1559	730	1464	692	11
9	32	A	1	3330	3330	317	A-A	light	learning	A	A	learning	32	396	672	317	634	1
9	33	A	1	1582	1582	518	A-A	light	search	A	A	searchA	1	718	555	648	518	31
9	34	A	1	1911	1911	352	A-A	light	search	A	A	searchA	2	423	751	352	719	46
9	35	A	1	1029	1029	246	A-A	light	search	A	A	searchA	3	807	299	725	246	9
9	36	A	1	3174	3174	196	A-A	light	search	A	A	searchA	4	1328	923	1254	884	54
9	37	A	1	1801	1801	493	A-A	light	search	A	A	searchA	5	726	627	648	587	51
9	38	A	1	1335	1335	410	A-A	light	search	A	A	searchA	6	1053	716	991	670	49
9	39	A	1	2211	2211	175	A-A	light	search	A	A	searchA	7	1379	210	1309	175	7
9	40	A	1	1405	1405	91	A-A	light	search	A	A	searchA	8	656	147	587	91	20
9	41	A	1	1135	1135	505	A-A	light	search	A	A	searchA	9	836	534	778	505	35
9	42	A	1	1067	1067	147	A-A	light	search	A	A	searchA	10	1011	194	954	147	37
9	43	A	1	3102	3102	273	A-A	light	search	A	A	searchA	11	733	847	663	807	22
9	44	A	1	8086	8086	338	A-A	light	search	A	A	searchA	12	1638	493	1582	472	43
9	45	A	1	1581	1581	169	A-A	light	search	A	A	searchA	13	420	215	358	169	16
9	46	A	1	2581	2581	321	A-A	light	search	A	A	searchA	14	463	788	382	759	21
9	47	A	1	1935	1935	141	A-A	light	search	A	A	searchA	15	200	304	141	262	8
9	48	A	1	1161	1161	443	A-A	light	search	A	A	searchA	16	793	475	725	443	28
9	49	A	1	11106	11106	389	A-A	light	test	A	A	testA-A	1	771	736	695	691	25
9	50	A	1	3910	3910	75	A-A	light	test	A	A	testA-A	2	1502	135	1425	75	37
9	51	A	1	7719	7719	414	A-A	light	test	A	A	testA-A	3	482	490	414	448	54
9	52	A	1	1241	1241	471	A-A	light	test	A	A	testA-A	4	1239	631	1189	609	45
9	53	A	1	1021	1021	191	A-A	light	test	A	A	testA-A	5	940	246	865	191	36
9	54	A	1	2976	2976	185	A-A	light	test	A	A	testA-A	6	1239	223	1180	185	20
9	55	A	1	7019	7019	312	A-A	light	test	A	A	testA-A	7	1483	780	1431	768	38
9	56	A	1	2838	2838	345	A-A	light	test	A	A	testA-A	8	1119	388	1049	345	1
9	57	A	1	2326	2326	338	A-A	light	test	A	A	testA-A	9	1655	758	1582	694	12
9	58	A	1	3677	3677	300	A-A	light	test	A	A	testA-A	10	1049	793	967	780	48
9	59	A	1	4616	4616	197	A-A	light	test	A	A	testA-A	11	1413	912	1350	883	22
9	60	A	1	7915	7915	156	A-A	light	test	A	A	testA-A	12	815	941	737	924	7
9	61	A	1	1220	1220	281	A-A	light	test	A	A	testA-A	13	1317	319	1248	281	40
9	62	A	1	3359	3359	157	A-A	light	test	A	A	testA-A	14	1020	946	955	923	51
9	63	A	1	4721	4721	90	A-A	light	test	A	A	testA-A	15	1309	149	1250	90	11
9	64	A	1	3572	3572	325	A-A	light	test	A	A	testA-A	16	1500	359	1438	325	53
10	1	B	1	2794	2794	73	A-A	dark	learning	A	A	learning	1	835	107	769	73	44
10	2	A	1	2158	2158	132	A-A	dark	learning	A	A	learning	2	200	173	132	138	38
10	3	B	1	1024	1024	229	A-A	dark	learning	A	A	learning	3	879	259	827	229	16
10	4	A	1	8474	8474	206	A-A	dark	learning	A	A	learning	4	1202	903	1147	874	3
10	5	A	1	7471	7471	282	A-A	dark	learning	A	A	learning	5	1488	320	1413	282	4
10	6	B	1	11935	11935	86	A-A	dark	learning	A	A	learning	6	1075	124	1013	86	23
10	7	A	0	NA	20000	316	A-A	dark	learning	A	A	learning	7	NA	NA	316	328	45
10	8	B	1	4515	4515	234	A-A	dark	learning	A	A	learning	8	301	336	234	311	36
10	9	A	1	1603	1603	310	A-A	dark	learning	A	A	learning	9	470	344	403	310	57
10	10	B	1	1577	1577	320	A-A	dark	learning	A	A	learning	10	1613	347	1537	320	7
10	11	A	1	11107	11107	128	A-A	dark	learning	A	A	learning	11	736	1004	670	952	52
10	12	B	1	1203	1203	416	A-A	dark	learning	A	A	learning	12	500	458	417	416	37
10	13	B	1	1058	1058	212	A-A	dark	learning	A	A	learning	13	866	244	797	212	22
10	14	A	1	2819	2819	248	A-A	dark	learning	A	A	learning	14	1453	871	1405	832	43
10	15	B	1	1209	1209	426	A-A	dark	learning	A	A	learning	15	873	684	807	654	13
10	16	A	1	7347	7347	286	A-A	dark	learning	A	A	learning	16	1408	813	1342	794	12
10	17	B	1	5649	5649	431	A-A	dark	learning	A	A	learning	17	729	466	662	431	10
10	18	A	1	1773	1773	350	A-A	dark	learning	A	A	learning	18	1632	616	1570	583	14
10	19	B	1	4229	4229	318	A-A	dark	learning	A	A	learning	19	1686	369	1602	350	49
10	20	A	1	13309	13309	241	A-A	dark	learning	A	A	learning	20	1508	851	1473	839	42
10	21	B	1	1534	1534	191	A-A	dark	learning	A	A	learning	21	857	244	779	191	56
10	22	A	1	9105	9105	346	A-A	dark	learning	A	A	learning	22	728	783	652	734	28
10	23	B	1	3478	3478	297	A-A	dark	learning	A	A	learning	23	886	825	814	783	50
10	24	A	1	2523	2523	285	A-A	dark	learning	A	A	learning	24	1041	323	974	285	29
10	25	A	1	11125	11125	191	A-A	dark	learning	A	A	learning	25	1344	232	1285	191	20
10	26	B	1	1386	1386	419	A-A	dark	learning	A	A	learning	26	651	459	599	419	41
10	27	A	1	1914	1914	368	A-A	dark	learning	A	A	learning	27	1606	646	1552	603	55
10	28	B	1	1664	1664	364	A-A	dark	learning	A	A	learning	28	1352	734	1307	716	25
10	29	B	1	2194	2194	120	A-A	dark	learning	A	A	learning	29	1440	166	1370	120	47
10	30	B	1	1220	1220	460	A-A	dark	learning	A	A	learning	30	1182	514	1115	460	19
10	31	A	1	2540	2540	337	A-A	dark	learning	A	A	learning	31	1131	373	1059	337	46
10	32	A	1	1628	1628	368	A-A	dark	learning	A	A	learning	32	1299	427	1205	368	40
10	33	A	1	2782	2782	146	A-A	dark	search	A	A	searchA	1	224	819	146	791	25
10	34	A	1	1641	1641	471	A-A	dark	search	A	A	searchA	2	681	472	634	471	11
10	35	A	1	1547	1547	193	A-A	dark	search	A	A	searchA	3	483	210	391	193	43
10	36	A	1	2005	2005	236	A-A	dark	search	A	A	searchA	4	469	266	421	236	12
10	37	A	1	1415	1415	482	A-A	dark	search	A	A	searchA	5	1100	556	1016	482	52
10	38	A	1	1552	1552	478	A-A	dark	search	A	A	searchA	6	1271	533	1213	478	16
10	39	A	1	1477	1477	254	A-A	dark	search	A	A	searchA	7	307	320	254	294	9
10	40	A	1	1892	1892	191	A-A	dark	search	A	A	searchA	8	1348	217	1298	191	22
10	41	A	1	1585	1585	355	A-A	dark	search	A	A	searchA	9	1480	388	1405	355	17
10	42	A	1	6956	6956	325	A-A	dark	search	A	A	searchA	10	1115	773	1077	755	3
10	43	A	1	3127	3127	222	A-A	dark	search	A	A	searchA	11	1605	873	1503	858	51
10	44	A	1	988	988	470	A-A	dark	search	A	A	searchA	12	1238	508	1154	470	33
10	45	A	1	2037	2037	139	A-A	dark	search	A	A	searchA	13	217	757	139	697	48
10	46	A	1	6376	6376	114	A-A	dark	search	A	A	searchA	14	236	124	173	114	57
10	47	A	1	4639	4639	153	A-A	dark	search	A	A	searchA	15	321	973	246	927	30
10	48	A	1	1244	1244	357	A-A	dark	search	A	A	searchA	16	1655	475	1563	436	45
10	49	A	1	1386	1386	461	A-A	dark	test	A	A	testA-A	1	748	491	711	461	29
10	50	A	1	1474	1474	328	A-A	dark	test	A	A	testA-A	2	588	357	512	328	18
10	51	A	1	3994	3994	190	A-A	dark	test	A	A	testA-A	3	334	241	276	190	20
10	52	A	1	1036	1036	499	A-A	dark	test	A	A	testA-A	4	583	543	499	520	54
10	53	A	0	NA	20000	438	A-A	dark	test	A	A	testA-A	5	NA	NA	1357	642	12
10	54	A	1	2544	2544	325	A-A	dark	test	A	A	testA-A	6	388	432	325	399	36
10	55	A	1	1842	1842	209	A-A	dark	test	A	A	testA-A	7	490	261	430	209	15
10	56	A	1	1471	1471	411	A-A	dark	test	A	A	testA-A	8	1116	704	1029	669	34
10	57	A	1	5050	5050	188	A-A	dark	test	A	A	testA-A	9	1655	897	1617	892	7
10	58	A	1	3116	3116	167	A-A	dark	test	A	A	testA-A	10	1468	949	1381	913	33
10	59	A	1	1114	1114	376	A-A	dark	test	A	A	testA-A	11	1379	733	1291	704	21
10	60	A	1	1193	1193	345	A-A	dark	test	A	A	testA-A	12	542	386	460	345	30
10	61	A	1	3132	3132	274	A-A	dark	test	A	A	testA-A	13	1560	859	1521	806	1
10	62	A	1	3641	3641	369	A-A	dark	test	A	A	testA-A	14	704	389	638	369	10
10	63	A	1	3014	3014	196	A-A	dark	test	A	A	testA-A	15	1210	919	1142	884	13
10	64	A	1	2106	2106	157	A-A	dark	test	A	A	testA-A	16	1072	959	1002	923	50
11	1	B	1	3844	3844	331	A-A	light	learning	A	A	learning	1	520	377	447	331	20
11	2	A	1	3955	3955	253	A-A	light	learning	A	A	learning	2	353	880	263	827	28
11	3	B	1	3836	3836	189	A-A	light	learning	A	A	learning	3	279	746	189	729	4
11	4	A	1	2578	2578	230	A-A	light	learning	A	A	learning	4	1198	879	1158	850	23
11	5	B	1	5876	5876	405	A-A	light	learning	A	A	learning	5	1543	705	1477	675	48
11	6	A	1	16959	16959	517	A-A	light	learning	A	A	learning	6	1334	542	1282	517	11
11	7	B	1	1231	1231	244	A-A	light	learning	A	A	learning	7	1041	283	975	244	18
11	8	A	1	8258	8258	302	A-A	light	learning	A	A	learning	8	980	785	943	778	46
11	9	A	1	2207	2207	337	A-A	light	learning	A	A	learning	9	1508	397	1437	337	22
11	10	A	1	3654	3654	273	A-A	light	learning	A	A	learning	10	325	621	273	572	38
11	11	B	1	6130	6130	208	A-A	light	learning	A	A	learning	11	479	923	422	872	9
11	12	B	1	2112	2112	256	A-A	light	learning	A	A	learning	12	1518	301	1453	256	42
11	13	A	1	1396	1396	427	A-A	light	learning	A	A	learning	13	540	465	469	427	36
11	14	B	1	1111	1111	257	A-A	light	learning	A	A	learning	14	883	312	828	257	41
11	15	B	1	2585	2585	287	A-A	light	learning	A	A	learning	15	600	854	543	793	13
11	16	A	1	4049	4049	240	A-A	light	learning	A	A	learning	16	314	265	249	240	57
11	17	B	1	2999	2999	143	A-A	light	learning	A	A	learning	17	213	893	143	843	10
11	18	B	1	2977	2977	253	A-A	light	learning	A	A	learning	18	1586	857	1538	827	6
11	19	A	1	12390	12390	475	A-A	light	learning	A	A	learning	19	1071	630	974	605	52
11	20	A	1	4302	4302	180	A-A	light	learning	A	A	learning	20	1260	948	1200	900	53
11	21	B	1	3795	3795	132	A-A	light	learning	A	A	learning	21	184	805	132	763	26
11	22	B	1	6853	6853	353	A-A	light	learning	A	A	learning	22	967	408	937	353	47
11	23	A	1	4723	4723	446	A-A	light	learning	A	A	learning	23	864	656	834	634	7
11	24	A	1	3006	3006	318	A-A	light	learning	A	A	learning	24	915	822	867	762	49
11	25	A	0	NA	20000	345	A-A	light	learning	A	A	learning	25	NA	NA	1575	353	19
11	26	A	1	3027	3027	232	A-A	light	learning	A	A	learning	26	583	265	508	232	35
11	27	B	1	11711	11711	301	A-A	light	learning	A	A	learning	27	929	842	886	779	50
11	28	B	1	6409	6409	195	A-A	light	learning	A	A	learning	28	1095	900	1063	885	17
11	29	B	1	2316	2316	265	A-A	light	learning	A	A	learning	29	1375	815	1303	815	40
11	30	A	1	2049	2049	242	A-A	light	learning	A	A	learning	30	324	548	242	517	16
11	31	A	1	2318	2318	281	A-A	light	learning	A	A	learning	31	1554	809	1545	799	15
11	32	B	1	12458	12458	310	A-A	light	learning	A	A	learning	32	1649	465	1610	437	14
11	33	A	1	3131	3131	267	A-A	light	search	A	A	searchA	1	571	868	497	813	2
11	34	A	1	1506	1506	434	A-A	light	search	A	A	searchA	2	1120	489	1030	434	47
11	35	A	1	3413	3413	453	A-A	light	search	A	A	searchA	3	1292	515	1248	453	44
11	36	A	1	7242	7242	419	A-A	light	search	A	A	searchA	4	1407	439	1366	419	41
11	37	A	1	2648	2648	313	A-A	light	search	A	A	searchA	5	1574	807	1530	767	56
11	38	A	1	4292	4292	133	A-A	light	search	A	A	searchA	6	653	1003	559	947	8
11	39	A	1	2939	2939	481	A-A	light	search	A	A	searchA	7	857	659	798	599	6
11	40	A	1	1339	1339	166	A-A	light	search	A	A	searchA	8	974	223	901	166	32
11	41	A	1	2105	2105	202	A-A	light	search	A	A	searchA	9	338	249	259	202	16
11	42	A	1	2722	2722	160	A-A	light	search	A	A	searchA	10	1170	943	1115	920	1
11	43	A	1	1306	1306	271	A-A	light	search	A	A	searchA	11	550	298	488	271	31
11	44	A	1	1435	1435	194	A-A	light	search	A	A	searchA	12	1398	256	1317	194	17
11	45	A	1	2967	2967	454	A-A	light	search	A	A	searchA	13	1546	490	1461	454	48
11	46	A	1	11307	11307	292	A-A	light	search	A	A	searchA	14	1636	397	1628	377	20
11	47	A	1	4952	4952	142	A-A	light	search	A	A	searchA	15	473	992	462	938	50
11	48	A	1	8118	8118	248	A-A	light	search	A	A	searchA	16	653	301	602	248	25
11	49	A	1	883	883	348	A-A	light	test	A	A	testA-A	1	912	387	844	348	18
11	50	A	1	4663	4663	170	A-A	light	test	A	A	testA-A	2	219	723	170	688	21
11	51	A	1	2580	2580	128	A-A	light	test	A	A	testA-A	3	603	180	529	128	35
11	52	A	1	6160	6160	415	A-A	light	test	A	A	testA-A	4	1311	719	1260	665	52
11	53	A	1	1356	1356	243	A-A	light	test	A	A	testA-A	5	1292	278	1217	243	5
11	54	A	1	8118	8118	138	A-A	light	test	A	A	testA-A	6	202	700	138	669	7
11	55	A	1	5991	5991	176	A-A	light	test	A	A	testA-A	7	458	932	405	904	1
11	56	A	1	1844	1844	206	A-A	light	test	A	A	testA-A	8	1097	893	1057	874	37
11	57	A	1	5212	5212	402	A-A	light	test	A	A	testA-A	9	1124	444	1077	402	13
11	58	A	1	13346	13346	141	A-A	light	test	A	A	testA-A	10	210	586	141	539	40
11	59	A	1	2273	2273	400	A-A	light	test	A	A	testA-A	11	1223	430	1223	400	49
11	60	A	1	2472	2472	68	A-A	light	test	A	A	testA-A	12	1664	132	1611	68	14
11	61	A	1	7488	7488	143	A-A	light	test	A	A	testA-A	13	278	181	215	143	36
11	62	A	1	1341	1341	319	A-A	light	test	A	A	testA-A	14	385	701	319	651	2
11	63	A	1	1182	1182	296	A-A	light	test	A	A	testA-A	15	1429	340	1362	296	28
11	64	A	1	9292	9292	414	A-A	light	test	A	A	testA-A	16	454	661	414	596	54
12	1	A	1	5993	5993	444	A-A	dark	learning	A	A	learning	1	1529	484	1449	444	36
12	2	B	1	3909	3909	443	A-A	dark	learning	A	A	learning	2	1173	675	1104	637	32
12	3	B	1	2684	2684	255	A-A	dark	learning	A	A	learning	3	552	867	489	825	28
12	4	A	1	1927	1927	108	A-A	dark	learning	A	A	learning	4	672	150	598	108	6
12	5	A	1	9089	9089	220	A-A	dark	learning	A	A	learning	5	1082	904	1003	860	7
12	6	A	1	7640	7640	356	A-A	dark	learning	A	A	learning	6	580	746	519	724	56
12	7	B	1	1485	1485	361	A-A	dark	learning	A	A	learning	7	1616	528	1559	477	42
12	8	B	1	1465	1465	351	A-A	dark	learning	A	A	learning	8	1430	396	1362	351	11
12	9	A	1	7705	7705	472	A-A	dark	learning	A	A	learning	9	1506	631	1448	594	50
12	10	A	1	2285	2285	392	A-A	dark	learning	A	A	learning	10	732	431	663	392	40
12	11	B	1	2292	2292	215	A-A	dark	learning	A	A	learning	11	276	881	215	816	12
12	13	A	1	16388	16388	192	A-A	dark	learning	A	A	learning	13	1235	222	1169	192	53
12	14	B	1	2887	2887	356	A-A	dark	learning	A	A	learning	14	428	489	356	461	1
12	15	A	1	1669	1669	514	A-A	dark	learning	A	A	learning	15	1460	610	1377	566	21
12	16	B	1	17950	17950	152	A-A	dark	learning	A	A	learning	16	226	423	152	395	18
12	17	B	1	1611	1611	524	A-A	dark	learning	A	A	learning	17	665	554	583	524	19
12	18	A	1	2753	2753	199	A-A	dark	learning	A	A	learning	18	273	649	199	626	27
12	19	B	1	1724	1724	427	A-A	dark	learning	A	A	learning	19	501	627	427	592	55
12	20	A	1	14334	14334	175	A-A	dark	learning	A	A	learning	20	1221	937	1171	905	14
12	21	B	1	2126	2126	119	A-A	dark	learning	A	A	learning	21	1463	166	1402	119	9
12	22	A	1	8468	8468	252	A-A	dark	learning	A	A	learning	22	800	840	740	828	47
12	23	A	1	11160	11160	126	A-A	dark	learning	A	A	learning	23	959	987	897	954	35
12	24	B	1	2942	2942	191	A-A	dark	learning	A	A	learning	24	1607	939	1573	889	33
12	25	A	1	2563	2563	214	A-A	dark	learning	A	A	learning	25	497	219	413	214	29
12	26	B	1	2889	2889	334	A-A	dark	learning	A	A	learning	26	1014	762	981	746	17
12	27	A	1	1538	1538	315	A-A	dark	learning	A	A	learning	27	1236	356	1158	315	39
12	28	B	1	4548	4548	425	A-A	dark	learning	A	A	learning	28	775	670	695	655	2
12	29	A	1	5851	5851	189	A-A	dark	learning	A	A	learning	29	769	880	700	891	25
12	31	B	1	1590	1590	330	A-A	dark	learning	A	A	learning	31	1648	599	1590	559	23
12	32	B	1	1529	1529	436	A-A	dark	learning	A	A	learning	32	1013	488	924	436	5
12	33	A	1	7082	7082	537	A-A	dark	search	A	A	searchA	1	1180	590	1111	543	42
12	34	A	1	1818	1818	255	A-A	dark	search	A	A	searchA	2	334	547	255	508	9
12	35	A	1	3344	3344	135	A-A	dark	search	A	A	searchA	3	198	606	135	582	10
12	36	A	1	4654	4654	367	A-A	dark	search	A	A	searchA	4	1490	746	1425	713	49
12	37	A	1	3352	3352	295	A-A	dark	search	A	A	searchA	5	870	338	786	295	24
12	38	A	1	4721	4721	155	A-A	dark	search	A	A	searchA	6	1604	950	1576	925	8
12	39	A	0	NA	20000	329	A-A	dark	search	A	A	searchA	7	NA	NA	1077	751	18
12	40	A	1	3279	3279	311	A-A	dark	search	A	A	searchA	8	355	343	311	313	28
12	41	A	1	1592	1592	387	A-A	dark	search	A	A	searchA	9	1580	568	1533	521	50
12	42	A	1	1428	1428	190	A-A	dark	search	A	A	searchA	10	303	737	190	710	17
12	43	A	1	12158	12158	129	A-A	dark	search	A	A	searchA	11	1643	993	1561	951	47
12	44	A	1	2156	2156	401	A-A	dark	search	A	A	searchA	12	481	438	401	404	27
12	45	A	1	1759	1759	130	A-A	dark	search	A	A	searchA	13	744	1003	660	950	7
12	46	A	1	8729	8729	239	A-A	dark	search	A	A	searchA	14	1433	324	1398	239	36
12	47	A	1	4892	4892	367	A-A	dark	search	A	A	searchA	15	864	410	777	367	48
12	48	A	1	1692	1692	353	A-A	dark	search	A	A	searchA	16	447	468	353	436	31
12	49	A	1	5753	5753	93	A-A	dark	test	A	A	testA-A	1	1476	131	1411	93	32
12	50	A	1	3972	3972	255	A-A	dark	test	A	A	testA-A	2	655	286	558	255	36
12	51	A	0	NA	20000	360	A-A	dark	test	A	A	testA-A	3	NA	NA	1318	720	43
12	52	A	1	1977	1977	365	A-A	dark	test	A	A	testA-A	4	408	745	383	715	28
12	53	A	1	2468	2468	307	A-A	dark	test	A	A	testA-A	5	397	792	343	773	29
12	54	A	1	1776	1776	452	A-A	dark	test	A	A	testA-A	6	1502	689	1446	628	49
12	55	A	1	4656	4656	140	A-A	dark	test	A	A	testA-A	7	808	961	725	940	5
12	56	A	1	6740	6740	330	A-A	dark	test	A	A	testA-A	8	1648	569	1590	519	34
12	57	A	1	10063	10063	451	A-A	dark	test	A	A	testA-A	9	693	696	611	629	19
12	58	A	1	2147	2147	161	A-A	dark	test	A	A	testA-A	10	503	173	431	161	6
12	59	A	1	5357	5357	128	A-A	dark	test	A	A	testA-A	11	200	146	142	128	8
12	60	A	1	2565	2565	322	A-A	dark	test	A	A	testA-A	12	374	787	322	747	40
12	61	A	1	1783	1783	455	A-A	dark	test	A	A	testA-A	13	1173	505	1075	455	22
12	62	A	1	7309	7309	170	A-A	dark	test	A	A	testA-A	14	1582	945	1504	910	2
12	63	A	1	1881	1881	276	A-A	dark	test	A	A	testA-A	15	533	822	472	804	57
12	64	A	1	3911	3911	297	A-A	dark	test	A	A	testA-A	16	1341	324	1300	297	48
13	1	A	1	4656	4656	406	A-A	light	learning	A	A	learning	1	581	717	527	674	19
13	2	A	1	1153	1153	102	A-A	light	learning	A	A	learning	2	1198	153	1124	102	15
13	3	B	1	1394	1394	196	A-A	light	learning	A	A	learning	3	1075	934	1002	884	33
13	4	B	1	1423	1423	336	A-A	light	learning	A	A	learning	4	1077	789	1021	744	30
13	5	A	1	9260	9260	100	A-A	light	learning	A	A	learning	5	212	129	165	100	3
13	6	A	1	7087	7087	438	A-A	light	learning	A	A	learning	6	1386	493	1317	438	57
13	7	B	1	3898	3898	305	A-A	light	learning	A	A	learning	7	1689	734	1615	684	49
13	8	B	1	2610	2610	217	A-A	light	learning	A	A	learning	8	1707	902	1625	863	13
13	9	A	1	1628	1628	138	A-A	light	learning	A	A	learning	9	1343	970	1277	942	39
13	10	B	1	5756	5756	266	A-A	light	learning	A	A	learning	10	1037	295	967	266	7
13	11	A	1	1288	1288	218	A-A	light	learning	A	A	learning	11	708	241	618	218	40
13	12	B	1	4982	4982	429	A-A	light	learning	A	A	learning	12	1160	471	1073	429	42
13	13	A	1	1723	1723	474	A-A	light	learning	A	A	learning	13	1390	517	1332	474	11
13	14	B	1	1694	1694	365	A-A	light	learning	A	A	learning	14	1524	738	1468	715	47
13	15	A	1	4346	4346	111	A-A	light	learning	A	A	learning	15	939	145	852	111	26
13	16	B	1	2834	2834	206	A-A	light	learning	A	A	learning	16	893	942	815	874	10
13	17	A	1	2062	2062	320	A-A	light	learning	A	A	learning	17	1509	383	1469	320	12
13	18	A	1	4400	4400	233	A-A	light	learning	A	A	learning	18	856	884	784	847	16
13	19	B	1	7254	7254	226	A-A	light	learning	A	A	learning	19	1243	886	1173	854	1
13	20	B	1	1911	1911	73	A-A	light	learning	A	A	learning	20	1134	149	1085	73	52
13	21	B	1	1094	1094	468	A-A	light	learning	A	A	learning	21	1161	500	1080	468	20
13	22	B	1	2776	2776	423	A-A	light	learning	A	A	learning	22	1447	702	1383	657	54
13	23	A	1	1476	1476	292	A-A	light	learning	A	A	learning	23	1686	443	1628	391	27
13	24	A	1	1397	1397	291	A-A	light	learning	A	A	learning	24	1672	446	1629	393	9
13	25	B	1	1787	1787	207	A-A	light	learning	A	A	learning	25	1474	919	1386	873	14
13	26	B	1	1400	1400	375	A-A	light	learning	A	A	learning	26	1521	409	1454	375	46
13	27	A	1	1379	1379	456	A-A	light	learning	A	A	learning	27	1280	673	1219	624	5
13	28	A	1	2325	2325	412	A-A	light	learning	A	A	learning	28	542	441	466	412	36
13	29	B	1	4599	4599	256	A-A	light	learning	A	A	learning	29	1008	857	954	824	55
13	30	A	1	6059	6059	522	A-A	light	learning	A	A	learning	30	657	565	553	522	22
13	31	A	1	1592	1592	269	A-A	light	learning	A	A	learning	31	355	655	269	618	2
13	32	B	1	2252	2252	273	A-A	light	learning	A	A	learning	32	354	511	273	462	17
13	33	A	1	4584	4584	183	A-A	light	search	A	A	searchA	1	272	220	196	183	49
13	34	A	1	3098	3098	301	A-A	light	search	A	A	searchA	2	361	682	301	626	36
13	35	A	1	1728	1728	220	A-A	light	search	A	A	searchA	3	1498	276	1434	220	47
13	36	A	1	8474	8474	301	A-A	light	search	A	A	searchA	4	381	523	301	491	29
13	37	A	1	1778	1778	240	A-A	light	search	A	A	searchA	5	519	883	443	840	1
13	38	A	1	8378	8378	82	A-A	light	search	A	A	searchA	6	1294	149	1273	82	12
13	39	A	1	2306	2306	156	A-A	light	search	A	A	searchA	7	891	203	813	156	41
13	40	A	1	1097	1097	466	A-A	light	search	A	A	searchA	8	1436	659	1371	614	17
13	41	A	1	14475	14475	222	A-A	light	search	A	A	searchA	9	598	882	533	858	6
13	42	A	1	2421	2421	187	A-A	light	search	A	A	searchA	10	816	930	735	893	9
13	43	A	1	1837	1837	313	A-A	light	search	A	A	searchA	11	1548	380	1504	313	52
13	44	A	1	2036	2036	126	A-A	light	search	A	A	searchA	12	413	170	307	126	33
13	45	A	1	5443	5443	146	A-A	light	search	A	A	searchA	13	472	992	404	934	39
13	46	A	1	2575	2575	224	A-A	light	search	A	A	searchA	14	292	887	224	840	44
13	47	A	1	5731	5731	197	A-A	light	search	A	A	searchA	15	1521	953	1481	883	20
13	48	A	1	1051	1051	359	A-A	light	search	A	A	searchA	16	486	417	401	359	15
13	49	A	1	2209	2209	195	A-A	light	test	A	A	testA-A	1	254	489	195	472	52
13	50	A	1	2033	2033	500	A-A	light	test	A	A	testA-A	2	1255	604	1171	580	22
13	51	A	1	2625	2625	226	A-A	light	test	A	A	testA-A	3	550	279	489	226	7
13	52	A	1	1839	1839	329	A-A	light	test	A	A	testA-A	4	1122	800	1089	751	53
13	53	A	1	1293	1293	487	A-A	light	test	A	A	testA-A	5	1326	654	1278	593	4
13	54	A	1	1353	1353	367	A-A	light	test	A	A	testA-A	6	1597	396	1553	368	48
13	55	A	1	1373	1373	508	A-A	light	test	A	A	testA-A	7	1096	591	1029	508	23
13	56	A	1	1799	1799	408	A-A	light	test	A	A	testA-A	8	508	474	408	437	40
13	57	A	1	1132	1132	437	A-A	light	test	A	A	testA-A	9	1280	486	1216	437	34
13	58	A	1	1221	1221	380	A-A	light	test	A	A	testA-A	10	904	450	817	380	39
13	59	A	1	3632	3632	144	A-A	light	test	A	A	testA-A	11	940	195	866	144	51
13	60	A	1	1111	1111	411	A-A	light	test	A	A	testA-A	12	1398	459	1344	411	27
13	61	A	1	4848	4848	479	A-A	light	test	A	A	testA-A	13	1069	637	1024	601	21
13	62	A	1	4342	4342	277	A-A	light	test	A	A	testA-A	14	1158	835	1122	803	31
13	63	A	1	1832	1832	284	A-A	light	test	A	A	testA-A	15	1544	329	1468	284	16
13	64	A	1	1467	1467	223	A-A	light	test	A	A	testA-A	16	1136	276	1054	223	57
14	1	B	1	7072	7072	223	A-A	dark	learning	A	A	learning	1	1575	904	1518	857	22
14	2	A	0	NA	20000	100	A-A	dark	learning	A	A	learning	2	NA	NA	922	100	5
14	3	A	1	2840	2840	481	A-A	dark	learning	A	A	learning	3	1066	636	995	599	41
14	4	B	1	1923	1923	324	A-A	dark	learning	A	A	learning	4	769	363	704	324	13
14	5	A	1	3221	3221	277	A-A	dark	learning	A	A	learning	5	1703	411	1643	371	34
14	6	B	1	9193	9193	328	A-A	dark	learning	A	A	learning	6	1052	781	985	752	11
14	7	B	1	2713	2713	83	A-A	dark	learning	A	A	learning	7	326	105	269	83	51
14	8	A	1	11210	11210	477	A-A	dark	learning	A	A	learning	8	1296	630	1228	603	49
14	9	B	1	11897	11897	302	A-A	dark	learning	A	A	learning	9	1663	774	1618	744	36
14	10	B	1	1653	1653	482	A-A	dark	learning	A	A	learning	10	757	526	687	482	32
14	11	A	1	1777	1777	460	A-A	dark	learning	A	A	learning	11	1058	507	1002	460	21
14	12	A	1	5866	5866	236	A-A	dark	learning	A	A	learning	12	1675	284	1635	236	14
14	13	A	1	1398	1398	487	A-A	dark	learning	A	A	learning	13	778	653	702	593	30
14	14	B	1	1481	1481	310	A-A	dark	learning	A	A	learning	14	375	577	310	553	31
14	15	B	1	2383	2383	233	A-A	dark	learning	A	A	learning	15	1675	876	1652	847	10
14	16	A	1	5236	5236	380	A-A	dark	learning	A	A	learning	16	1310	439	1237	380	4
14	17	A	1	1419	1419	197	A-A	dark	learning	A	A	learning	17	273	657	197	588	53
14	18	B	1	2609	2609	259	A-A	dark	learning	A	A	learning	18	695	293	626	259	23
14	19	B	1	3509	3509	257	A-A	dark	learning	A	A	learning	19	1681	287	1624	257	37
14	20	A	1	5560	5560	141	A-A	dark	learning	A	A	learning	20	196	736	141	704	42
14	21	A	1	1301	1301	229	A-A	dark	learning	A	A	learning	21	767	867	672	851	38
14	22	B	1	1651	1651	168	A-A	dark	learning	A	A	learning	22	230	662	168	642	39
14	23	A	1	3236	3236	275	A-A	dark	learning	A	A	learning	23	338	613	275	578	56
14	24	B	1	1374	1374	461	A-A	dark	learning	A	A	learning	24	559	506	495	461	8
14	25	B	1	2311	2311	73	A-A	dark	learning	A	A	learning	25	543	126	468	73	27
14	26	B	1	1208	1208	221	A-A	dark	learning	A	A	learning	26	654	278	581	221	57
14	27	A	1	2350	2350	192	A-A	dark	learning	A	A	learning	27	1677	911	1646	888	25
14	28	A	1	9027	9027	338	A-A	dark	learning	A	A	learning	28	1230	777	1177	742	3
14	29	B	1	7820	7820	197	A-A	dark	learning	A	A	learning	29	609	918	526	883	17
14	30	A	1	1438	1438	519	A-A	dark	learning	A	A	learning	30	946	555	891	519	16
14	31	B	1	5329	5329	300	A-A	dark	learning	A	A	learning	31	881	798	817	780	35
14	32	A	1	1306	1306	340	A-A	dark	learning	A	A	learning	32	591	793	535	740	43
14	33	A	1	5194	5194	285	A-A	dark	search	A	A	searchA	1	1436	308	1375	285	49
14	34	A	1	1709	1709	440	A-A	dark	search	A	A	searchA	2	1220	429	1174	440	5
14	35	A	1	4072	4072	397	A-A	dark	search	A	A	searchA	3	938	439	889	397	23
14	36	A	1	1039	1039	387	A-A	dark	search	A	A	searchA	4	501	437	442	387	33
14	37	A	1	3462	3462	247	A-A	dark	search	A	A	searchA	5	541	891	478	833	31
14	38	A	1	2826	2826	355	A-A	dark	search	A	A	searchA	6	1541	421	1495	355	36
14	39	A	1	1682	1682	214	A-A	dark	search	A	A	searchA	7	269	742	214	696	22
14	40	A	1	12944	12944	156	A-A	dark	search	A	A	searchA	8	1297	183	1219	156	50
14	41	A	1	1605	1605	372	A-A	dark	search	A	A	searchA	9	403	634	372	592	56
14	42	A	1	996	996	428	A-A	dark	search	A	A	searchA	10	494	578	428	547	54
14	43	A	1	2107	2107	259	A-A	dark	search	A	A	searchA	11	1514	292	1463	259	9
14	44	A	1	5451	5451	72	A-A	dark	search	A	A	searchA	12	1390	97	1337	72	37
14	45	A	1	3609	3609	209	A-A	dark	search	A	A	searchA	13	526	926	471	871	14
14	46	A	1	6645	6645	413	A-A	dark	search	A	A	searchA	14	1453	445	1368	413	15
14	47	A	1	1822	1822	478	A-A	dark	search	A	A	searchA	15	735	641	668	602	32
14	48	A	1	5725	5725	186	A-A	dark	search	A	A	searchA	16	689	945	618	894	24
14	49	A	0	NA	20000	310	A-A	dark	test	A	A	testA-A	1	NA	NA	310	405	55
14	50	A	1	2444	2444	199	A-A	dark	test	A	A	testA-A	2	1653	262	1610	199	51
14	51	A	1	1374	1374	463	A-A	dark	test	A	A	testA-A	3	1492	503	1457	467	34
14	52	A	1	13732	13732	485	A-A	dark	test	A	A	testA-A	4	780	642	735	595	42
14	53	A	1	2750	2750	467	A-A	dark	test	A	A	testA-A	5	1276	648	1233	613	46
14	54	A	1	1453	1453	382	A-A	dark	test	A	A	testA-A	6	1277	441	1239	382	41
14	55	A	1	1912	1912	149	A-A	dark	test	A	A	testA-A	7	219	536	149	501	32
14	56	A	0	NA	20000	420	A-A	dark	test	A	A	testA-A	8	NA	NA	1500	653	30
14	57	A	1	7405	7405	63	A-A	dark	test	A	A	testA-A	9	1408	112	1345	63	29
14	58	A	1	8260	8260	139	A-A	dark	test	A	A	testA-A	10	453	171	392	139	20
14	59	A	1	3713	3713	356	A-A	dark	test	A	A	testA-A	11	1084	757	1032	724	53
14	60	A	1	3868	3868	124	A-A	dark	test	A	A	testA-A	12	581	160	515	124	40
14	61	A	1	1116	1116	320	A-A	dark	test	A	A	testA-A	13	702	350	643	320	49
14	62	A	1	3051	3051	111	A-A	dark	test	A	A	testA-A	14	1378	163	1310	111	26
14	63	A	1	2878	2878	274	A-A	dark	test	A	A	testA-A	15	1202	851	1149	806	5
14	64	A	1	1408	1408	415	A-A	dark	test	A	A	testA-A	16	504	718	415	626	17
15	1	A	1	15889	15889	156	A-A	light	learning	A	A	learning	1	1228	998	1147	924	48
15	2	B	1	12219	12219	322	A-A	light	learning	A	A	learning	2	1656	591	1598	542	6
15	3	A	1	3906	3906	232	A-A	light	learning	A	A	learning	3	916	886	866	848	1
15	4	B	1	1654	1654	397	A-A	light	learning	A	A	learning	4	1308	431	1237	397	10
15	5	A	1	4968	4968	172	A-A	light	learning	A	A	learning	5	993	947	940	908	40
15	6	A	1	4325	4325	444	A-A	light	learning	A	A	learning	6	1334	663	1269	636	23
15	7	B	1	2145	2145	238	A-A	light	learning	A	A	learning	7	1335	279	1295	238	14
15	8	B	1	1804	1804	270	A-A	light	learning	A	A	learning	8	1213	891	1166	810	27
15	9	B	1	3015	3015	128	A-A	light	learning	A	A	learning	9	224	494	128	484	19
15	10	A	1	15652	15652	344	A-A	light	learning	A	A	learning	10	650	775	574	736	50
15	11	A	1	4345	4345	165	A-A	light	learning	A	A	learning	11	1135	960	1054	915	29
15	12	B	1	1042	1042	431	A-A	light	learning	A	A	learning	12	881	498	824	431	17
15	13	B	1	5335	5335	121	A-A	light	learning	A	A	learning	13	921	149	858	121	41
15	14	A	1	3611	3611	146	A-A	light	learning	A	A	learning	14	425	185	361	146	33
15	15	B	1	4705	4705	324	A-A	light	learning	A	A	learning	15	583	771	530	756	2
15	16	A	1	1451	1451	479	A-A	light	learning	A	A	learning	16	1094	671	1037	601	57
15	17	B	1	17257	17257	360	A-A	light	learning	A	A	learning	17	1264	756	1200	720	25
15	18	A	1	7301	7301	217	A-A	light	learning	A	A	learning	18	277	279	217	246	16
15	19	B	1	2528	2528	318	A-A	light	learning	A	A	learning	19	1560	339	1497	318	38
15	20	A	1	1204	1204	520	A-A	light	learning	A	A	learning	20	1143	603	1093	560	39
15	21	B	1	8505	8505	213	A-A	light	learning	A	A	learning	21	328	245	265	213	30
15	22	A	1	12200	12200	266	A-A	light	learning	A	A	learning	22	1704	450	1654	399	26
15	23	A	1	2897	2897	148	A-A	light	learning	A	A	learning	23	1184	187	1110	148	13
15	24	B	1	3184	3184	123	A-A	light	learning	A	A	learning	24	498	196	438	123	32
15	25	A	1	11428	11428	193	A-A	light	learning	A	A	learning	25	1209	932	1159	887	21
15	26	B	1	6258	6258	78	A-A	light	learning	A	A	learning	26	454	95	420	78	5
15	28	B	1	2425	2425	161	A-A	light	learning	A	A	learning	28	1329	923	1282	919	37
15	29	A	1	14158	14158	299	A-A	light	learning	A	A	learning	29	759	818	715	781	35
15	30	B	1	1888	1888	181	A-A	light	learning	A	A	learning	30	280	837	181	791	56
15	31	A	1	2343	2343	357	A-A	light	learning	A	A	learning	31	1580	757	1532	723	36
15	32	B	1	2671	2671	483	A-A	light	learning	A	A	learning	32	1230	511	1175	483	47
15	33	A	1	7437	7437	222	A-A	light	search	A	A	searchA	1	1598	887	1535	858	35
15	34	A	1	12738	12738	223	A-A	light	search	A	A	searchA	2	630	274	584	223	20
15	35	A	1	1863	1863	198	A-A	light	search	A	A	searchA	3	331	890	234	882	52
15	36	A	1	7352	7352	529	A-A	light	search	A	A	searchA	4	1111	586	1066	551	49
15	37	A	1	2641	2641	201	A-A	light	search	A	A	searchA	5	691	248	651	201	2
15	38	A	1	1686	1686	262	A-A	light	search	A	A	searchA	6	375	863	323	818	7
15	39	A	1	954	954	444	A-A	light	search	A	A	searchA	7	685	503	644	444	53
15	40	A	1	13150	13150	277	A-A	light	search	A	A	searchA	8	785	851	714	803	47
15	41	A	1	3652	3652	152	A-A	light	search	A	A	searchA	9	231	229	152	213	14
15	42	A	1	10899	10899	341	A-A	light	search	A	A	searchA	10	686	809	643	739	13
15	43	A	1	1134	1134	519	A-A	light	search	A	A	searchA	11	868	540	814	519	28
15	44	A	1	1166	1166	364	A-A	light	search	A	A	searchA	12	995	733	944	716	9
15	45	A	1	2886	2886	304	A-A	light	search	A	A	searchA	13	1313	335	1223	304	11
15	46	A	1	3579	3579	451	A-A	light	search	A	A	searchA	14	1531	552	1469	529	56
15	47	A	1	1947	1947	257	A-A	light	search	A	A	searchA	15	429	876	374	823	32
15	48	A	1	3582	3582	395	A-A	light	search	A	A	searchA	16	538	726	482	685	51
15	49	A	1	2405	2405	165	A-A	light	test	A	A	testA-A	1	236	221	165	187	4
15	50	A	1	14103	14103	316	A-A	light	test	A	A	testA-A	2	1641	800	1604	760	46
15	51	A	1	3778	3778	516	A-A	light	test	A	A	testA-A	3	734	552	672	516	11
15	52	A	1	1492	1492	527	A-A	light	test	A	A	testA-A	4	587	600	527	536	31
15	53	A	1	1714	1714	265	A-A	light	test	A	A	testA-A	5	598	862	569	815	22
15	54	A	1	7859	7859	475	A-A	light	test	A	A	testA-A	6	1139	658	1092	605	37
15	55	A	1	3031	3031	257	A-A	light	test	A	A	testA-A	7	1699	375	1663	321	24
15	56	A	1	1056	1056	257	A-A	light	test	A	A	testA-A	8	992	285	925	257	54
15	57	A	1	1316	1316	392	A-A	light	test	A	A	testA-A	9	447	471	392	415	43
15	58	A	1	1042	1042	394	A-A	light	test	A	A	testA-A	10	611	424	571	394	41
15	59	A	1	4597	4597	221	A-A	light	test	A	A	testA-A	11	1132	891	1058	859	15
15	60	A	1	10305	10305	339	A-A	light	test	A	A	testA-A	12	604	382	538	339	44
15	61	A	1	7910	7910	140	A-A	light	test	A	A	testA-A	13	1722	189	1648	140	5
15	62	A	1	2689	2689	254	A-A	light	test	A	A	testA-A	14	1659	854	1602	826	50
15	63	A	1	1139	1139	261	A-A	light	test	A	A	testA-A	15	1055	285	995	261	6
15	64	A	1	2098	2098	428	A-A	light	test	A	A	testA-A	16	1315	483	1261	428	52
16	1	B	1	2399	2399	66	A-A	dark	learning	A	A	learning	1	1062	94	996	66	13
16	2	B	1	19594	19594	128	A-A	dark	learning	A	A	learning	2	906	989	849	952	11
16	3	A	1	17422	17422	91	A-A	dark	learning	A	A	learning	3	429	105	377	91	16
16	4	A	1	1601	1601	489	A-A	dark	learning	A	A	learning	4	1507	630	1431	563	57
16	6	A	1	4692	4692	257	A-A	dark	learning	A	A	learning	6	1027	861	967	823	7
16	7	B	1	1448	1448	289	A-A	dark	learning	A	A	learning	7	1099	316	1032	289	4
16	8	A	1	2855	2855	306	A-A	dark	learning	A	A	learning	8	1626	787	1601	774	26
16	9	A	1	2377	2377	152	A-A	dark	learning	A	A	learning	9	1116	168	1037	152	27
16	10	A	1	2773	2773	210	A-A	dark	learning	A	A	learning	10	1040	921	985	870	5
16	11	B	1	1482	1482	312	A-A	dark	learning	A	A	learning	11	396	327	312	320	42
16	12	B	1	3355	3355	256	A-A	dark	learning	A	A	learning	12	1739	344	1664	318	12
16	13	B	1	1207	1207	235	A-A	dark	learning	A	A	learning	13	556	263	473	235	22
16	14	A	0	NA	20000	291	A-A	dark	learning	A	A	learning	14	NA	NA	1241	291	30
16	15	B	1	1893	1893	122	A-A	dark	learning	A	A	learning	15	592	188	527	122	53
16	16	A	1	2084	2084	121	A-A	dark	learning	A	A	learning	16	403	172	311	121	55
16	17	A	1	8380	8380	456	A-A	dark	learning	A	A	learning	17	1289	445	1263	456	24
16	18	B	1	1512	1512	355	A-A	dark	learning	A	A	learning	18	715	378	680	355	8
16	19	A	1	18028	18028	323	A-A	dark	learning	A	A	learning	19	1601	377	1558	323	23
16	20	B	1	11482	11482	289	A-A	dark	learning	A	A	learning	20	1247	825	1186	791	44
16	21	A	1	1508	1508	88	A-A	dark	learning	A	A	learning	21	847	130	804	88	18
16	22	B	1	7793	7793	420	A-A	dark	learning	A	A	learning	22	639	450	593	420	54
16	23	B	1	6367	6367	127	A-A	dark	learning	A	A	learning	23	938	999	864	953	29
16	24	A	1	8932	8932	207	A-A	dark	learning	A	A	learning	24	580	228	513	207	20
16	25	B	1	1191	1191	411	A-A	dark	learning	A	A	learning	25	1168	403	1101	411	1
16	26	B	1	1350	1350	349	A-A	dark	learning	A	A	learning	26	418	449	349	426	35
16	27	A	0	NA	20000	222	A-A	dark	learning	A	A	learning	27	NA	NA	1079	858	41
16	28	A	1	8617	8617	145	A-A	dark	learning	A	A	learning	28	1113	984	1020	935	28
16	29	B	1	1878	1878	186	A-A	dark	learning	A	A	learning	29	256	773	186	744	9
16	30	A	1	3918	3918	272	A-A	dark	learning	A	A	learning	30	645	868	585	808	3
16	31	A	1	1896	1896	209	A-A	dark	learning	A	A	learning	31	293	786	209	723	14
16	32	B	1	3920	3920	254	A-A	dark	learning	A	A	learning	32	1716	617	1666	574	45
16	33	A	1	4471	4471	272	A-A	dark	search	A	A	searchA	1	970	878	893	808	48
16	34	A	1	1368	1368	400	A-A	dark	search	A	A	searchA	2	689	729	605	680	49
16	35	A	1	1452	1452	329	A-A	dark	search	A	A	searchA	3	407	569	329	517	57
16	36	A	1	1049	1049	268	A-A	dark	search	A	A	searchA	4	606	319	560	268	40
16	37	A	1	4457	4457	459	A-A	dark	search	A	A	searchA	5	1006	522	973	459	52
16	38	A	1	2402	2402	439	A-A	dark	search	A	A	searchA	6	1550	672	1481	605	28
16	39	A	1	4866	4866	288	A-A	dark	search	A	A	searchA	7	352	815	304	792	27
16	40	A	1	9870	9870	459	A-A	dark	search	A	A	searchA	8	769	489	719	459	56
16	41	A	1	10287	10287	386	A-A	dark	search	A	A	searchA	9	805	703	758	694	18
16	42	A	1	3475	3475	346	A-A	dark	search	A	A	searchA	10	685	745	605	734	38
16	43	A	0	NA	20000	316	A-A	dark	search	A	A	searchA	11	NA	NA	400	764	41
16	44	A	1	5231	5231	178	A-A	dark	search	A	A	searchA	12	975	943	876	902	13
16	45	A	1	15575	15575	150	A-A	dark	search	A	A	searchA	13	1328	931	1253	930	7
16	46	A	1	2217	2217	162	A-A	dark	search	A	A	searchA	14	855	239	782	162	30
16	47	A	1	2165	2165	221	A-A	dark	search	A	A	searchA	15	1270	905	1245	859	51
16	48	A	1	1956	1956	136	A-A	dark	search	A	A	searchA	16	986	198	901	136	15
16	49	A	1	2449	2449	354	A-A	dark	test	A	A	testA-A	1	1625	610	1566	581	24
16	50	A	1	1620	1620	247	A-A	dark	test	A	A	testA-A	2	833	856	744	833	57
16	51	A	1	1118	1118	103	A-A	dark	test	A	A	testA-A	3	722	138	648	103	16
16	52	A	1	6119	6119	133	A-A	dark	test	A	A	testA-A	4	1119	946	1060	947	39
16	53	A	1	2518	2518	322	A-A	dark	test	A	A	testA-A	5	962	788	863	758	46
16	54	A	1	14048	14048	200	A-A	dark	test	A	A	testA-A	6	1115	242	1036	200	43
16	55	A	1	2046	2046	184	A-A	dark	test	A	A	testA-A	7	1287	923	1264	896	5
16	56	A	1	1060	1060	412	A-A	dark	test	A	A	testA-A	8	481	526	412	448	41
16	57	A	1	5638	5638	193	A-A	dark	test	A	A	testA-A	9	1262	243	1205	193	3
16	58	A	1	6124	6124	271	A-A	dark	test	A	A	testA-A	10	980	881	929	809	29
16	59	A	1	1842	1842	90	A-A	dark	test	A	A	testA-A	11	972	151	909	90	50
16	60	A	1	4120	4120	254	A-A	dark	test	A	A	testA-A	12	361	825	276	826	11
16	61	A	1	1248	1248	403	A-A	dark	test	A	A	testA-A	13	456	680	403	642	36
16	62	A	1	2373	2373	311	A-A	dark	test	A	A	testA-A	14	1292	348	1200	311	1
16	63	A	1	977	977	340	A-A	dark	test	A	A	testA-A	15	613	378	540	340	19
16	64	A	1	3533	3533	197	A-A	dark	test	A	A	testA-A	16	983	240	921	197	14
17	1	B	0	NA	20000	345	A-A	light	learning	A	A	learning	1	NA	NA	1575	471	34
17	2	A	1	3127	3127	192	A-A	light	learning	A	A	learning	2	308	213	240	192	36
17	3	A	1	3342	3342	255	A-A	light	learning	A	A	learning	3	759	282	692	255	48
17	4	B	1	1384	1384	524	A-A	light	learning	A	A	learning	4	1242	565	1178	556	50
17	5	A	0	NA	20000	177	A-A	light	learning	A	A	learning	5	NA	NA	907	903	29
17	6	A	1	7427	7427	226	A-A	light	learning	A	A	learning	6	1368	900	1303	854	28
17	7	B	1	2856	2856	280	A-A	light	learning	A	A	learning	7	851	828	783	800	52
17	8	B	1	1781	1781	231	A-A	light	learning	A	A	learning	8	1015	272	951	231	1
17	9	A	1	7776	7776	286	A-A	light	learning	A	A	learning	9	352	385	286	360	9
17	10	B	1	3100	3100	182	A-A	light	learning	A	A	learning	10	1583	216	1524	182	30
17	11	A	1	6750	6750	141	A-A	light	learning	A	A	learning	11	210	681	141	640	17
17	12	B	1	2120	2120	225	A-A	light	learning	A	A	learning	12	1432	260	1383	225	54
17	13	B	1	1661	1661	127	A-A	light	learning	A	A	learning	13	215	417	127	390	25
17	14	A	1	2226	2226	170	A-A	light	learning	A	A	learning	14	1202	222	1152	170	15
17	15	A	1	2092	2092	321	A-A	light	learning	A	A	learning	15	660	370	587	321	41
17	16	B	1	968	968	309	A-A	light	learning	A	A	learning	16	731	356	670	309	19
17	17	A	1	2351	2351	201	A-A	light	learning	A	A	learning	17	1144	242	1049	201	57
17	18	B	1	2699	2699	124	A-A	light	learning	A	A	learning	18	1522	152	1459	124	16
17	19	B	1	1022	1022	280	A-A	light	learning	A	A	learning	19	532	316	447	280	47
17	20	A	1	5412	5412	469	A-A	light	learning	A	A	learning	20	589	651	512	611	43
17	21	A	1	2497	2497	181	A-A	light	learning	A	A	learning	21	1445	921	1397	899	42
17	22	B	1	4439	4439	144	A-A	light	learning	A	A	learning	22	192	859	144	829	13
17	23	B	1	7340	7340	250	A-A	light	learning	A	A	learning	23	1697	270	1649	250	11
17	24	A	0	NA	20000	261	A-A	light	learning	A	A	learning	24	NA	NA	389	819	23
17	25	B	1	9107	9107	277	A-A	light	learning	A	A	learning	25	560	325	497	277	18
17	26	B	1	10652	10652	520	A-A	light	learning	A	A	learning	26	757	584	711	520	21
17	27	A	1	2657	2657	266	A-A	light	learning	A	A	learning	27	1082	837	1031	814	38
17	28	A	1	2002	2002	89	A-A	light	learning	A	A	learning	28	216	129	170	89	2
17	29	B	1	1005	1005	420	A-A	light	learning	A	A	learning	29	494	451	442	420	37
17	30	A	1	3423	3423	447	A-A	light	learning	A	A	learning	30	905	658	868	633	49
17	31	B	1	1132	1132	445	A-A	light	learning	A	A	learning	31	652	713	611	635	46
17	32	A	1	6822	6822	251	A-A	light	learning	A	A	learning	32	1055	297	995	251	55
17	33	A	1	3255	3255	217	A-A	light	search	A	A	searchA	1	1468	258	1406	217	10
17	34	A	1	2872	2872	195	A-A	light	search	A	A	searchA	2	1581	245	1532	195	45
17	35	A	1	2160	2160	113	A-A	light	search	A	A	searchA	3	1040	153	984	113	13
17	36	A	1	11797	11797	146	A-A	light	search	A	A	searchA	4	1156	953	1100	934	57
17	37	A	1	4633	4633	318	A-A	light	search	A	A	searchA	5	1193	358	1146	318	32
17	38	A	1	6790	6790	204	A-A	light	search	A	A	searchA	6	620	898	536	876	12
17	39	A	1	18774	18774	334	A-A	light	search	A	A	searchA	7	393	781	334	740	41
17	40	A	1	5228	5228	132	A-A	light	search	A	A	searchA	8	188	878	132	855	5
17	41	A	1	19335	19335	138	A-A	light	search	A	A	searchA	9	368	952	320	942	55
17	42	A	1	4531	4531	175	A-A	light	search	A	A	searchA	10	792	920	758	905	16
17	43	A	1	5561	5561	152	A-A	light	search	A	A	searchA	11	551	969	486	928	43
17	44	A	1	2341	2341	194	A-A	light	search	A	A	searchA	12	370	214	307	194	48
17	45	A	1	2004	2004	437	A-A	light	search	A	A	searchA	13	556	459	497	437	19
17	46	A	1	4536	4536	422	A-A	light	search	A	A	searchA	14	1302	437	1225	422	49
17	47	A	1	3484	3484	317	A-A	light	search	A	A	searchA	15	856	800	785	763	52
17	48	A	1	9947	9947	139	A-A	light	search	A	A	searchA	16	179	875	139	838	3
17	49	A	1	1285	1285	329	A-A	light	test	A	A	testA-A	1	1107	365	1031	329	20
17	50	A	1	2712	2712	165	A-A	light	test	A	A	testA-A	2	1430	212	1351	165	37
17	51	A	1	984	984	434	A-A	light	test	A	A	testA-A	3	784	469	714	434	45
17	52	A	1	11506	11506	423	A-A	light	test	A	A	testA-A	4	1188	467	1131	423	12
17	53	A	1	1136	1136	383	A-A	light	test	A	A	testA-A	5	1118	424	1053	383	15
17	54	A	1	13709	13709	285	A-A	light	test	A	A	testA-A	6	1682	364	1635	334	43
17	55	A	1	19084	19084	286	A-A	light	test	A	A	testA-A	7	1634	829	1551	794	49
17	56	A	1	3507	3507	189	A-A	light	test	A	A	testA-A	8	1702	222	1639	189	35
17	57	A	1	2194	2194	177	A-A	light	test	A	A	testA-A	9	833	189	763	177	13
17	58	A	1	2460	2460	422	A-A	light	test	A	A	testA-A	10	562	461	489	422	10
17	59	A	1	3585	3585	117	A-A	light	test	A	A	testA-A	11	931	148	861	117	42
17	60	A	1	2698	2698	196	A-A	light	test	A	A	testA-A	12	1277	235	1204	196	16
17	61	A	1	3197	3197	408	A-A	light	test	A	A	testA-A	13	1026	710	950	672	34
17	62	A	1	1362	1362	445	A-A	light	test	A	A	testA-A	14	1418	474	1336	445	9
17	63	A	1	1252	1252	354	A-A	light	test	A	A	testA-A	15	1173	367	1114	354	21
17	64	A	1	1716	1716	498	A-A	light	test	A	A	testA-A	16	1104	612	1058	582	7
18	1	B	1	4963	4963	299	A-A	dark	learning	A	A	learning	1	602	807	545	781	5
18	2	A	1	2536	2536	147	A-A	dark	learning	A	A	learning	2	1320	181	1258	147	13
18	3	B	1	1022	1022	151	A-A	dark	learning	A	A	learning	3	1471	200	1430	151	47
18	4	A	1	1351	1351	149	A-A	dark	learning	A	A	learning	4	571	200	520	149	14
18	5	A	1	8726	8726	284	A-A	dark	learning	A	A	learning	5	1480	834	1427	796	31
18	6	B	1	3516	3516	349	A-A	dark	learning	A	A	learning	6	904	755	815	731	35
18	7	A	0	NA	20000	429	A-A	dark	learning	A	A	learning	7	NA	NA	1491	510	12
18	8	B	1	1269	1269	315	A-A	dark	learning	A	A	learning	8	747	365	695	315	26
18	9	B	1	1220	1220	334	A-A	dark	learning	A	A	learning	9	1316	384	1248	334	23
18	10	A	1	5314	5314	172	A-A	dark	learning	A	A	learning	10	472	959	422	908	54
18	11	B	1	1237	1237	516	A-A	dark	learning	A	A	learning	11	954	553	873	516	27
18	12	A	1	2184	2184	169	A-A	dark	learning	A	A	learning	12	466	961	418	911	16
18	13	A	1	2374	2374	175	A-A	dark	learning	A	A	learning	13	1665	944	1621	905	18
18	14	B	1	2314	2314	267	A-A	dark	learning	A	A	learning	14	343	571	267	538	20
18	15	A	1	2295	2295	413	A-A	dark	learning	A	A	learning	15	513	668	460	667	4
18	16	B	1	1024	1024	308	A-A	dark	learning	A	A	learning	16	847	343	796	308	17
18	17	B	1	2033	2033	387	A-A	dark	learning	A	A	learning	17	710	722	658	693	7
18	18	A	1	8570	8570	364	A-A	dark	learning	A	A	learning	18	1594	423	1556	367	3
18	19	A	1	2979	2979	140	A-A	dark	learning	A	A	learning	19	191	627	140	573	28
18	20	B	1	1717	1717	487	A-A	dark	learning	A	A	learning	20	1113	521	1050	487	30
18	21	B	1	5927	5927	124	A-A	dark	learning	A	A	learning	21	548	156	468	124	11
18	22	A	1	1866	1866	291	A-A	dark	learning	A	A	learning	22	359	402	291	369	21
18	23	B	1	1623	1623	398	A-A	dark	learning	A	A	learning	23	1332	438	1281	398	51
18	24	A	1	2917	2917	128	A-A	dark	learning	A	A	learning	24	384	178	311	128	45
18	25	B	1	1065	1065	149	A-A	dark	learning	A	A	learning	25	1133	190	1080	149	33
18	26	A	1	3344	3344	203	A-A	dark	learning	A	A	learning	26	272	683	203	656	46
18	27	A	1	6480	6480	316	A-A	dark	learning	A	A	learning	27	1192	363	1138	316	48
18	28	B	1	7955	7955	440	A-A	dark	learning	A	A	learning	28	1458	695	1413	640	32
18	30	B	1	2878	2878	325	A-A	dark	learning	A	A	learning	30	417	370	337	325	43
18	31	B	1	2028	2028	263	A-A	dark	learning	A	A	learning	31	331	771	263	723	15
18	32	A	1	1847	1847	86	A-A	dark	learning	A	A	learning	32	1041	124	987	86	22
18	33	A	1	5419	5419	177	A-A	dark	search	A	A	searchA	1	892	952	813	903	29
18	34	A	1	3155	3155	136	A-A	dark	search	A	A	searchA	2	226	618	136	597	57
18	35	A	1	4445	4445	215	A-A	dark	search	A	A	searchA	3	520	897	439	865	17
18	36	A	1	1479	1479	353	A-A	dark	search	A	A	searchA	4	533	397	484	353	19
18	37	A	1	5569	5569	420	A-A	dark	search	A	A	searchA	5	1413	705	1361	660	37
18	38	A	1	1212	1212	234	A-A	dark	search	A	A	searchA	6	993	264	962	234	9
18	39	A	1	1999	1999	258	A-A	dark	search	A	A	searchA	7	1468	284	1423	258	7
18	40	A	1	2185	2185	264	A-A	dark	search	A	A	searchA	8	1709	658	1656	624	24
18	41	A	1	4636	4636	277	A-A	dark	search	A	A	searchA	9	421	824	348	803	28
18	42	A	1	4277	4277	304	A-A	dark	search	A	A	searchA	10	410	801	347	776	5
18	43	A	1	4987	4987	411	A-A	dark	search	A	A	searchA	11	820	461	771	411	38
18	44	A	1	1113	1113	210	A-A	dark	search	A	A	searchA	12	919	249	848	210	55
18	45	A	1	2669	2669	356	A-A	dark	search	A	A	searchA	13	438	732	356	715	22
18	46	A	1	1544	1544	158	A-A	dark	search	A	A	searchA	14	228	744	158	715	34
18	47	A	0	NA	20000	135	A-A	dark	search	A	A	searchA	15	NA	NA	1215	945	44
18	48	A	1	1327	1327	533	A-A	dark	search	A	A	searchA	16	1449	549	1373	533	15
18	49	A	1	2070	2070	248	A-A	dark	test	A	A	testA-A	1	482	304	427	248	10
18	50	A	1	2302	2302	395	A-A	dark	test	A	A	testA-A	2	473	600	395	556	11
18	51	A	1	3016	3016	91	A-A	dark	test	A	A	testA-A	3	274	130	184	91	37
18	52	A	1	11337	11337	268	A-A	dark	test	A	A	testA-A	4	1116	325	1079	268	50
18	53	A	1	4410	4410	227	A-A	dark	test	A	A	testA-A	5	376	901	303	853	30
18	54	A	1	10001	10001	107	A-A	dark	test	A	A	testA-A	6	1440	138	1380	107	54
18	55	A	1	1449	1449	507	A-A	dark	test	A	A	testA-A	7	1352	575	1299	507	45
18	56	A	0	NA	20000	157	A-A	dark	test	A	A	testA-A	8	NA	NA	1273	923	9
18	57	A	1	3350	3350	314	A-A	dark	test	A	A	testA-A	9	538	792	450	766	17
18	58	A	1	15377	15377	246	A-A	dark	test	A	A	testA-A	10	1696	864	1626	834	12
18	59	A	1	3520	3520	161	A-A	dark	test	A	A	testA-A	11	1695	231	1634	161	52
18	60	A	1	1192	1192	439	A-A	dark	test	A	A	testA-A	12	1213	473	1143	439	48
18	61	A	1	12335	12335	188	A-A	dark	test	A	A	testA-A	13	873	927	852	892	29
18	62	A	1	3229	3229	459	A-A	dark	test	A	A	testA-A	14	625	479	560	459	55
18	63	A	1	2058	2058	195	A-A	dark	test	A	A	testA-A	15	601	220	506	195	25
18	64	A	1	1328	1328	358	A-A	dark	test	A	A	testA-A	16	414	573	358	546	44
19	1	A	0	NA	20000	171	A-A	light	learning	A	A	learning	1	NA	NA	1479	909	32
19	2	B	1	2636	2636	159	A-A	light	learning	A	A	learning	2	225	838	159	802	39
19	3	A	1	8423	8423	423	A-A	light	learning	A	A	learning	3	1525	552	1497	490	9
19	4	B	1	12383	12383	91	A-A	light	learning	A	A	learning	4	1231	136	1177	91	51
19	5	A	1	3625	3625	170	A-A	light	learning	A	A	learning	5	229	637	170	616	29
19	6	B	1	14591	14591	164	A-A	light	learning	A	A	learning	6	529	225	443	164	46
19	7	B	1	13444	13444	374	A-A	light	learning	A	A	learning	7	529	768	494	706	23
19	8	A	1	4449	4449	188	A-A	light	learning	A	A	learning	8	1666	918	1598	892	50
19	9	B	1	1647	1647	322	A-A	light	learning	A	A	learning	9	411	408	322	334	41
19	10	B	1	2499	2499	250	A-A	light	learning	A	A	learning	10	319	794	250	762	36
19	11	A	1	2780	2780	143	A-A	light	learning	A	A	learning	11	218	755	143	723	28
19	12	A	1	7649	7649	272	A-A	light	learning	A	A	learning	12	1721	800	1648	787	35
19	13	B	1	3685	3685	174	A-A	light	learning	A	A	learning	13	1570	205	1522	174	47
19	14	A	1	2023	2023	524	A-A	light	learning	A	A	learning	14	1121	617	1080	556	57
19	15	B	1	1431	1431	215	A-A	light	learning	A	A	learning	15	1099	270	1012	215	43
19	16	A	1	5740	5740	294	A-A	light	learning	A	A	learning	16	1682	801	1561	786	2
19	18	A	1	3406	3406	199	A-A	light	learning	A	A	learning	18	1101	941	1056	881	48
19	19	B	1	1688	1688	139	A-A	light	learning	A	A	learning	19	598	218	510	139	5
19	20	B	1	1525	1525	404	A-A	light	learning	A	A	learning	20	911	444	813	404	26
19	21	B	1	1222	1222	540	A-A	light	learning	A	A	learning	21	1282	552	1175	540	53
19	22	A	1	1120	1120	311	A-A	light	learning	A	A	learning	22	810	340	710	311	8
19	23	B	1	1075	1075	459	A-A	light	learning	A	A	learning	23	1032	493	937	459	24
19	24	A	1	1998	1998	231	A-A	light	learning	A	A	learning	24	547	305	434	231	56
19	25	B	1	3733	3733	129	A-A	light	learning	A	A	learning	25	224	794	129	724	34
19	26	B	1	1106	1106	279	A-A	light	learning	A	A	learning	26	825	340	768	279	10
19	27	A	1	2427	2427	364	A-A	light	learning	A	A	learning	27	791	751	692	716	27
19	28	A	1	5696	5696	381	A-A	light	learning	A	A	learning	28	1596	431	1538	381	30
19	29	B	1	4856	4856	210	A-A	light	learning	A	A	learning	29	1120	890	1050	870	25
19	30	A	1	1559	1559	266	A-A	light	learning	A	A	learning	30	768	342	669	266	3
19	31	B	1	3092	3092	247	A-A	light	learning	A	A	learning	31	634	884	519	833	38
19	32	A	1	2187	2187	157	A-A	light	learning	A	A	learning	32	1136	191	1060	157	44
19	33	A	1	1381	1381	526	A-A	light	search	A	A	searchA	1	1207	575	1097	554	14
19	34	A	1	2026	2026	259	A-A	light	search	A	A	searchA	2	1433	306	1335	259	47
19	35	A	1	1544	1544	488	A-A	light	search	A	A	searchA	3	1145	651	1065	592	21
19	36	A	1	1062	1062	505	A-A	light	search	A	A	searchA	4	1368	579	1258	505	31
19	37	A	1	5141	5141	161	A-A	light	search	A	A	searchA	5	1089	986	1013	919	38
19	38	A	1	2204	2204	298	A-A	light	search	A	A	searchA	6	353	370	298	320	36
19	39	A	1	3494	3494	512	A-A	light	search	A	A	searchA	7	1470	622	1408	568	4
19	40	A	1	1354	1354	488	A-A	light	search	A	A	searchA	8	1141	533	1088	488	25
19	41	A	1	1749	1749	336	A-A	light	search	A	A	searchA	9	572	774	475	744	28
19	42	A	1	4305	4305	178	A-A	light	search	A	A	searchA	10	280	565	178	561	8
19	43	A	1	3293	3293	142	A-A	light	search	A	A	searchA	11	232	857	142	796	11
19	44	A	1	4968	4968	135	A-A	light	search	A	A	searchA	12	365	181	263	135	30
19	45	A	1	13508	13508	467	A-A	light	search	A	A	searchA	13	1056	673	990	613	51
19	46	A	1	2572	2572	522	A-A	light	search	A	A	searchA	14	1164	614	1142	558	35
19	47	A	1	1007	1007	322	A-A	light	search	A	A	searchA	15	873	360	774	322	18
19	48	A	1	4378	4378	523	A-A	light	search	A	A	searchA	16	1219	633	1149	557	20
19	49	A	1	1047	1047	143	A-A	light	test	A	A	testA-A	1	718	226	631	143	14
19	50	A	1	5732	5732	515	A-A	light	test	A	A	testA-A	2	1168	565	1088	515	13
19	51	A	1	1920	1920	456	A-A	light	test	A	A	testA-A	3	1003	679	940	624	48
19	52	A	1	2449	2449	388	A-A	light	test	A	A	testA-A	4	505	618	388	555	8
19	53	A	1	1346	1346	460	A-A	light	test	A	A	testA-A	5	570	537	467	460	37
19	54	A	1	4306	4306	110	A-A	light	test	A	A	testA-A	6	848	147	729	110	55
19	55	A	1	6760	6760	217	A-A	light	test	A	A	testA-A	7	341	907	280	863	19
19	56	A	1	2356	2356	291	A-A	light	test	A	A	testA-A	8	1666	555	1629	541	10
19	57	A	1	2258	2258	164	A-A	light	test	A	A	testA-A	9	1240	236	1189	164	39
19	58	A	1	1866	1866	462	A-A	light	test	A	A	testA-A	10	1296	504	1219	462	26
19	59	A	1	1790	1790	244	A-A	light	test	A	A	testA-A	11	550	851	489	836	16
19	60	A	1	3365	3365	185	A-A	light	test	A	A	testA-A	12	288	294	185	229	7
19	61	A	1	4587	4587	440	A-A	light	test	A	A	testA-A	13	1430	705	1324	640	1
19	62	A	1	11178	11178	344	A-A	light	test	A	A	testA-A	14	600	801	514	736	6
19	63	A	1	2418	2418	515	A-A	light	test	A	A	testA-A	15	1146	621	1082	565	42
19	64	A	1	4922	4922	487	A-A	light	test	A	A	testA-A	16	961	656	872	593	27
20	1	B	1	4059	4059	229	A-A	dark	learning	A	A	learning	1	1344	253	1293	229	5
20	2	A	1	14456	14456	476	A-A	dark	learning	A	A	learning	2	1493	513	1426	476	48
20	3	A	1	11058	11058	149	A-A	dark	learning	A	A	learning	3	313	956	259	931	56
20	4	B	1	3715	3715	398	A-A	dark	learning	A	A	learning	4	473	528	398	487	32
20	5	B	1	2801	2801	402	A-A	dark	learning	A	A	learning	5	1345	427	1295	402	47
20	6	A	1	5786	5786	143	A-A	dark	learning	A	A	learning	6	215	515	143	494	38
20	7	A	0	NA	20000	172	A-A	dark	learning	A	A	learning	7	NA	NA	404	908	19
20	8	B	1	2680	2680	96	A-A	dark	learning	A	A	learning	8	1548	131	1492	96	40
20	9	B	1	1431	1431	280	A-A	dark	learning	A	A	learning	9	1070	316	1016	280	22
20	10	B	1	4414	4414	210	A-A	dark	learning	A	A	learning	10	1193	891	1130	870	42
20	11	A	1	15402	15402	158	A-A	dark	learning	A	A	learning	11	569	944	501	922	43
20	12	A	1	6850	6850	163	A-A	dark	learning	A	A	learning	12	923	951	859	917	39
20	13	B	1	6396	6396	308	A-A	dark	learning	A	A	learning	13	532	338	452	308	21
20	14	A	1	2115	2115	408	A-A	dark	learning	A	A	learning	14	1035	437	975	408	14
20	15	A	0	NA	20000	405	A-A	dark	learning	A	A	learning	15	NA	NA	1210	675	4
20	16	B	1	3619	3619	242	A-A	dark	learning	A	A	learning	16	990	867	942	838	9
20	17	B	1	1819	1819	120	A-A	dark	learning	A	A	learning	17	432	156	366	120	52
20	18	A	0	NA	20000	273	A-A	dark	learning	A	A	learning	18	NA	NA	1414	807	50
20	19	A	0	NA	20000	175	A-A	dark	learning	A	A	learning	19	NA	NA	1242	905	41
20	20	B	1	4981	4981	278	A-A	dark	learning	A	A	learning	20	1323	846	1273	802	7
20	21	B	1	2384	2384	266	A-A	dark	learning	A	A	learning	21	337	503	266	476	35
20	22	A	1	1836	1836	314	A-A	dark	learning	A	A	learning	22	612	355	543	314	51
20	23	A	1	1660	1660	382	A-A	dark	learning	A	A	learning	23	569	404	511	382	10
20	24	B	1	8199	8199	329	A-A	dark	learning	A	A	learning	24	1646	659	1591	620	27
20	25	B	1	1681	1681	438	A-A	dark	learning	A	A	learning	25	934	678	861	642	46
20	26	A	1	10845	10845	495	A-A	dark	learning	A	A	learning	26	597	524	526	495	49
20	27	A	1	5553	5553	417	A-A	dark	learning	A	A	learning	27	1557	536	1503	494	55
20	28	B	1	4407	4407	175	A-A	dark	learning	A	A	learning	28	360	933	295	905	11
20	29	B	1	1760	1760	246	A-A	dark	learning	A	A	learning	29	638	291	563	246	54
20	30	B	1	5290	5290	219	A-A	dark	learning	A	A	learning	30	1491	244	1432	219	57
20	31	A	1	9967	9967	401	A-A	dark	learning	A	A	learning	31	1570	576	1519	541	30
20	32	A	0	NA	20000	514	A-A	dark	learning	A	A	learning	32	NA	NA	996	566	12
20	33	A	1	10339	10339	261	A-A	dark	search	A	A	searchA	1	1528	855	1497	819	42
20	34	A	1	2064	2064	214	A-A	dark	search	A	A	searchA	2	1477	264	1414	214	38
20	35	A	1	1547	1547	431	A-A	dark	search	A	A	searchA	3	1080	466	1008	431	29
20	36	A	1	1201	1201	240	A-A	dark	search	A	A	searchA	4	885	279	819	240	31
20	37	A	1	8776	8776	160	A-A	dark	search	A	A	searchA	5	1537	952	1472	920	41
20	38	A	1	2728	2728	186	A-A	dark	search	A	A	searchA	6	246	403	186	363	57
20	39	A	1	2217	2217	271	A-A	dark	search	A	A	searchA	7	1398	282	1328	271	44
20	40	A	1	1661	1661	344	A-A	dark	search	A	A	searchA	8	1000	369	928	344	43
20	41	A	1	2091	2091	411	A-A	dark	search	A	A	searchA	9	483	496	411	475	25
20	42	A	1	1962	1962	335	A-A	dark	search	A	A	searchA	10	401	614	335	576	7
20	43	A	1	7772	7772	267	A-A	dark	search	A	A	searchA	11	1010	841	949	813	1
20	44	A	1	4798	4798	356	A-A	dark	search	A	A	searchA	12	543	743	474	724	8
20	45	A	1	2411	2411	360	A-A	dark	search	A	A	searchA	13	424	430	360	393	5
20	46	A	1	5390	5390	194	A-A	dark	search	A	A	searchA	14	1164	928	1107	886	6
20	47	A	0	NA	20000	212	A-A	dark	search	A	A	searchA	15	NA	NA	216	868	12
20	48	A	1	1417	1417	131	A-A	dark	search	A	A	searchA	16	890	169	828	131	39
20	49	A	1	1499	1499	295	A-A	dark	test	A	A	testA-A	1	631	347	564	295	48
20	50	A	1	4144	4144	361	A-A	dark	test	A	A	testA-A	2	1638	460	1559	417	31
20	51	A	1	5005	5005	159	A-A	dark	test	A	A	testA-A	3	418	940	343	921	27
20	52	A	1	11189	11189	173	A-A	dark	test	A	A	testA-A	4	632	935	566	907	5
20	53	A	1	7928	7928	353	A-A	dark	test	A	A	testA-A	5	1590	400	1553	353	41
20	54	A	1	1823	1823	266	A-A	dark	test	A	A	testA-A	6	341	683	266	642	8
20	55	A	0	NA	20000	126	A-A	dark	test	A	A	testA-A	7	NA	NA	1220	954	46
20	56	A	1	2431	2431	328	A-A	dark	test	A	A	testA-A	8	408	406	328	381	34
20	57	A	1	6809	6809	452	A-A	dark	test	A	A	testA-A	9	1127	475	1068	452	42
20	58	A	1	4776	4776	195	A-A	dark	test	A	A	testA-A	10	1585	243	1539	195	57
20	59	A	1	4438	4438	515	A-A	dark	test	A	A	testA-A	11	1273	597	1209	565	1
20	60	A	1	2874	2874	163	A-A	dark	test	A	A	testA-A	12	1704	208	1634	163	20
20	61	A	1	6886	6886	206	A-A	dark	test	A	A	testA-A	13	1132	911	1065	874	33
20	62	A	1	2230	2230	294	A-A	dark	test	A	A	testA-A	14	373	460	294	421	24
20	63	A	0	NA	20000	230	A-A	dark	test	A	A	testA-A	15	NA	NA	513	230	26
20	64	A	0	NA	20000	144	A-A	dark	test	A	A	testA-A	16	NA	NA	1085	936	23
21	1	B	1	1953	1953	345	A-B	light	learning	A	B	learning	1	414.384	556.515	345	525	56
21	2	A	1	5715	5715	268	A-B	light	learning	A	B	learning	2	1733.61	356.33	1652	311	2
21	3	B	1	2643	2643	151	A-B	light	learning	A	B	learning	3	1447.34	198.184	1396	151	12
21	4	A	1	1890	1890	64	A-B	light	learning	A	B	learning	4	707.655	96.089	633	64	39
21	5	A	1	2734	2734	313	A-B	light	learning	A	B	learning	5	506.469	344.319	444	313	10
21	6	B	1	2868	2868	484	A-B	light	learning	A	B	learning	6	1140.06	649.601	1089	596	44
21	7	A	1	1039	1039	388	A-B	light	learning	A	B	learning	7	964.893	449.416	911	388	30
21	8	B	1	18398	18398	409	A-B	light	learning	A	B	learning	8	1025.95	729.676	974	671	51
21	9	A	1	2999	2999	195	A-B	light	learning	A	B	learning	9	1534.42	936.867	1452	885	45
21	10	B	1	1487	1487	178	A-B	light	learning	A	B	learning	10	1199.11	942.873	1142	902	18
21	11	B	1	1310	1310	483	A-B	light	learning	A	B	learning	11	734.68	628.582	690	597	6
21	12	A	1	3531	3531	257	A-B	light	learning	A	B	learning	12	454.421	869.805	396	823	31
21	13	B	1	2094	2094	287	A-B	light	learning	A	B	learning	13	887.822	825.765	823	793	46
21	14	B	1	14830	14830	396	A-B	light	learning	A	B	learning	14	653.605	430.399	604	396	55
21	15	A	1	2453	2453	421	A-B	light	learning	A	B	learning	15	515.477	714.662	434	659	34
21	16	A	1	1979	1979	211	A-B	light	learning	A	B	learning	16	888.823	261.242	828	211	48
21	17	B	1	2285	2285	217	A-B	light	learning	A	B	learning	17	1619.5	242.224	1527	217	23
21	18	B	1	1915	1915	268	A-B	light	learning	A	B	learning	18	671.622	301.279	609	268	49
21	19	A	1	2887	2887	158	A-B	light	learning	A	B	learning	19	676.626	176.163	622	158	14
21	20	A	1	1867	1867	395	A-B	light	learning	A	B	learning	20	1566.45	579.537	1525	542	38
21	21	A	1	2238	2238	244	A-B	light	learning	A	B	learning	21	1374.27	297.275	1311	244	57
21	22	B	1	1374	1374	367	A-B	light	learning	A	B	learning	22	930.862	415.385	877	367	24
21	23	A	1	2893	2893	135	A-B	light	learning	A	B	learning	23	214.198	422.391	135	407	28
21	24	B	1	1530	1530	428	A-B	light	learning	A	B	learning	24	962.892	448.415	889	428	43
21	25	A	1	1593	1593	244	A-B	light	learning	A	B	learning	25	1182.09	281.26	1135	244	17
21	26	A	1	3218	3218	310	A-B	light	learning	A	B	learning	26	479.444	338.313	408	310	42
21	27	B	1	1910	1910	190	A-B	light	learning	A	B	learning	27	1686.56	223.207	1628	190	32
21	28	B	1	1394	1394	99	A-B	light	learning	A	B	learning	28	1592.47	154.143	1531	99	15
21	29	B	1	2528	2528	155	A-B	light	learning	A	B	learning	29	444.411	974.903	370	925	27
21	30	A	1	3132	3132	232	A-B	light	learning	A	B	learning	30	1540.43	891.826	1488	848	13
21	31	B	1	7602	7602	482	A-B	light	learning	A	B	learning	31	930.862	527.488	859	482	11
21	32	A	1	1504	1504	408	A-B	light	learning	A	B	learning	32	1518.41	712.66	1468	672	50
21	33	A	1	2256	2256	336	A-B	light	search	A	B	searchA	1	690.639	386.358	637	336	44
21	34	A	1	5099	5099	423	A-B	light	search	A	B	searchA	2	909.842	719.666	845	657	57
21	35	A	1	1594	1594	418	A-B	light	search	A	B	searchA	3	1446.34	694.643	1364	662	52
21	36	A	1	10755	10755	226	A-B	light	search	A	B	searchA	4	1024.95	884.819	968	854	11
21	37	A	1	1801	1801	429	A-B	light	search	A	B	searchA	5	578.536	689.639	498	651	2
21	38	A	1	2035	2035	248	A-B	light	search	A	B	searchA	6	1592.47	870.806	1536	832	15
21	39	A	1	1268	1268	92	A-B	light	search	A	B	searchA	7	664.615	75.0695	624	92	10
21	40	A	1	1233	1233	337	A-B	light	search	A	B	searchA	8	1041.96	367.34	973	337	32
21	41	A	1	2188	2188	85	A-B	light	search	A	B	searchA	9	667.618	139.129	601	85	8
21	42	A	1	1314	1314	214	A-B	light	search	A	B	searchA	10	933.865	234.217	869	214	23
21	43	A	1	13712	13712	536	A-B	light	search	A	B	searchA	11	690.639	563.522	659	536	36
21	44	A	1	6299	6299	280	A-B	light	search	A	B	searchA	12	338.313	750.695	280	712	31
21	45	A	1	13192	13192	387	A-B	light	search	A	B	searchA	13	735.681	761.705	681	693	43
21	46	A	1	1372	1372	521	A-B	light	search	A	B	searchA	14	1098.02	555.514	1030	521	26
21	47	A	1	1508	1508	516	A-B	light	search	A	B	searchA	15	879.815	594.551	796	564	46
21	48	A	1	2421	2421	236	A-B	light	search	A	B	searchA	16	614.569	264.245	551	236	18
21	49	B	1	2319	2319	468	A-B	light	test	A	B	testA-B	1	1198.11	641.594	1120	612	47
21	50	B	1	2775	2775	327	A-B	light	test	A	B	testA-B	2	1677.55	429.398	1593	392	18
21	51	B	1	5537	5537	111	A-B	light	test	A	B	testA-B	3	1669.55	145.134	1616	111	9
21	52	B	1	2363	2363	472	A-B	light	test	A	B	testA-B	4	951.881	514.476	875	472	26
21	53	B	1	1504	1504	160	A-B	light	test	A	B	testA-B	5	521.483	194.18	469	160	57
21	54	B	1	1596	1596	443	A-B	light	test	A	B	testA-B	6	1384.28	480.445	1309	443	8
21	55	B	1	2655	2655	193	A-B	light	test	A	B	testA-B	7	269.249	626.58	193	593	36
21	56	B	1	1618	1618	199	A-B	light	test	A	B	testA-B	8	1061.98	232.215	1011	199	56
21	57	B	1	2564	2564	478	A-B	light	test	A	B	testA-B	9	895.83	652.604	841	602	31
21	58	B	1	3526	3526	414	A-B	light	test	A	B	testA-B	10	1555.44	712.66	1492	666	3
21	59	B	1	2032	2032	233	A-B	light	test	A	B	testA-B	11	307.284	465.431	233	429	55
21	60	B	1	1877	1877	374	A-B	light	test	A	B	testA-B	12	463.429	416.385	394	374	2
21	61	B	1	1374	1374	484	A-B	light	test	A	B	testA-B	13	1125.04	525.487	1070	484	24
21	62	B	1	1256	1256	246	A-B	light	test	A	B	testA-B	14	692.641	279.259	626	246	32
21	63	B	1	1434	1434	369	A-B	light	test	A	B	testA-B	15	1136.05	399.37	1036	369	45
21	64	B	1	1450	1450	484	A-B	light	test	A	B	testA-B	16	545.505	508.471	494	484	35
22	1	A	1	4406	4406	258	A-B	dark	learning	A	B	learning	1	498.462	282.261	445	258	5
22	2	B	1	2725	2725	331	A-B	dark	learning	A	B	learning	2	406.376	646.599	331	568	48
22	3	B	1	1330	1330	433	A-B	dark	learning	A	B	learning	3	1240.15	479.444	1158	433	39
22	4	A	1	2404	2404	259	A-B	dark	learning	A	B	learning	4	320.297	471.437	259	411	38
22	5	B	1	1947	1947	291	A-B	dark	learning	A	B	learning	5	1677.55	352.326	1591	291	14
22	6	B	1	1645	1645	302	A-B	dark	learning	A	B	learning	6	1288.19	348.322	1240	302	10
22	7	A	1	5918	5918	194	A-B	dark	learning	A	B	learning	7	1225.13	929.861	1166	886	24
22	8	A	1	14922	14922	266	A-B	dark	learning	A	B	learning	8	1540.43	860.797	1476	814	28
22	9	A	1	2575	2575	173	A-B	dark	learning	A	B	learning	9	230.213	528.489	173	451	8
22	10	A	1	1598	1598	409	A-B	dark	learning	A	B	learning	10	529.49	479.444	504	409	53
22	11	B	1	1620	1620	483	A-B	dark	learning	A	B	learning	11	633.587	656.608	569	597	36
22	12	B	1	1705	1705	475	A-B	dark	learning	A	B	learning	12	1441.33	666.617	1379	605	45
22	13	A	1	3941	3941	182	A-B	dark	learning	A	B	learning	13	1205.12	941.872	1164	898	54
22	14	B	1	1427	1427	383	A-B	dark	learning	A	B	learning	14	1079	750.695	1039	697	34
22	15	A	1	2185	2185	170	A-B	dark	learning	A	B	learning	15	238.221	383.355	170	314	1
22	16	B	1	1745	1745	298	A-B	dark	learning	A	B	learning	16	753.698	845.783	689	782	51
22	17	A	1	5818	5818	368	A-B	dark	learning	A	B	learning	17	1399.3	389.361	1349	368	43
22	18	A	1	1144	1144	373	A-B	dark	learning	A	B	learning	18	1265.17	427.396	1224	373	55
22	19	B	1	2760	2760	338	A-B	dark	learning	A	B	learning	19	791.733	753.698	702	742	16
22	20	B	1	2186	2186	313	A-B	dark	learning	A	B	learning	20	433.401	366.339	375	313	32
22	21	A	1	3713	3713	232	A-B	dark	learning	A	B	learning	21	1181.09	880.816	1112	848	56
22	22	B	1	5505	5505	359	A-B	dark	learning	A	B	learning	22	894.828	390.361	874	359	3
22	23	A	1	2285	2285	415	A-B	dark	learning	A	B	learning	23	755.7	708.656	657	665	42
22	24	B	1	3707	3707	303	A-B	dark	learning	A	B	learning	24	554.513	833.772	484	777	35
22	25	B	1	1007	1007	148	A-B	dark	learning	A	B	learning	25	1018.94	193.179	957	148	13
22	26	A	1	2229	2229	141	A-B	dark	learning	A	B	learning	26	830.769	165.153	751	141	17
22	27	B	1	1070	1070	377	A-B	dark	learning	A	B	learning	27	1159.07	403.373	1113	377	27
22	28	A	0	NA	20000	241	A-B	dark	learning	A	B	learning	28	NA	NA	1283	241	26
22	29	A	1	4617	4617	537	A-B	dark	learning	A	B	learning	29	1202.11	598.554	1159	537	6
22	30	B	1	1257	1257	412	A-B	dark	learning	A	B	learning	30	1014.94	449.416	968	412	50
22	31	B	1	1179	1179	319	A-B	dark	learning	A	B	learning	31	705.653	365.338	640	319	57
22	32	A	1	2545	2545	193	A-B	dark	learning	A	B	learning	32	1592.47	271.251	1515	193	7
22	33	A	1	5010	5010	130	A-B	dark	search	A	B	searchA	1	171.159	335.31	130	280	56
22	34	A	1	19892	19892	372	A-B	dark	search	A	B	searchA	2	970.899	760.704	949	708	32
22	35	A	1	6536	6536	242	A-B	dark	search	A	B	searchA	3	809.75	277.257	767	242	22
22	36	A	1	2580	2580	490	A-B	dark	search	A	B	searchA	4	1267.17	648.601	1214	590	47
22	37	A	1	3037	3037	230	A-B	dark	search	A	B	searchA	5	1471.36	306.284	1413	230	11
22	38	A	1	2997	2997	174	A-B	dark	search	A	B	searchA	6	960.89	228.211	900	174	23
22	39	A	0	NA	20000	252	A-B	dark	search	A	B	searchA	7	NA	NA	1256	828	29
22	40	A	1	6294	6294	186	A-B	dark	search	A	B	searchA	8	1578.46	219.203	1529	186	1
22	41	A	1	9751	9751	268	A-B	dark	search	A	B	searchA	9	1064.99	859.796	1006	812	9
22	42	A	1	6613	6613	180	A-B	dark	search	A	B	searchA	10	570.528	959.889	503	900	45
22	43	A	1	1972	1972	153	A-B	dark	search	A	B	searchA	11	348.322	185.172	267	153	30
22	44	A	1	4970	4970	288	A-B	dark	search	A	B	searchA	12	586.543	814.754	548	792	24
22	45	A	1	4383	4383	510	A-B	dark	search	A	B	searchA	13	1231.14	624.578	1148	570	18
22	46	A	1	1775	1775	136	A-B	dark	search	A	B	searchA	14	288.267	188.174	203	136	43
22	47	A	1	2862	2862	316	A-B	dark	search	A	B	searchA	15	1083	827.766	1005	764	25
22	48	A	1	5514	5514	112	A-B	dark	search	A	B	searchA	16	1504.39	164.152	1465	112	46
22	49	B	0	NA	20000	456	A-B	dark	test	A	B	testA-B	1	NA	NA	1464	607	15
22	50	B	1	1407	1407	372	A-B	dark	test	A	B	testA-B	2	1625.51	670.621	1548	678	49
22	51	B	1	1380	1380	521	A-B	dark	test	A	B	testA-B	3	708.656	598.554	625	559	7
22	52	B	1	1239	1239	299	A-B	dark	test	A	B	testA-B	4	535.496	826.765	487	781	41
22	53	B	1	1268	1268	400	A-B	dark	test	A	B	testA-B	5	546.506	740.686	486	680	23
22	54	B	1	925	925	340	A-B	dark	test	A	B	testA-B	6	466.432	375.348	411	340	53
22	55	B	1	4271	4271	439	A-B	dark	test	A	B	testA-B	7	838.777	668.619	771	641	21
22	56	B	1	3851	3851	178	A-B	dark	test	A	B	testA-B	8	938.869	243.225	854	178	14
22	57	B	1	2272	2272	446	A-B	dark	test	A	B	testA-B	9	931.863	665.616	858	634	43
22	58	B	1	1356	1356	133	A-B	dark	test	A	B	testA-B	10	1196.11	1004.93	1158	947	33
22	59	B	1	2171	2171	227	A-B	dark	test	A	B	testA-B	11	944.875	264.245	861	227	20
22	60	B	1	1665	1665	396	A-B	dark	test	A	B	testA-B	12	1152.07	718.665	1124	684	17
22	61	B	1	1485	1485	522	A-B	dark	test	A	B	testA-B	13	1160.07	553.513	1120	522	39
22	62	B	1	2004	2004	221	A-B	dark	test	A	B	testA-B	14	1679.56	906.84	1623	859	31
22	63	B	1	1394	1394	385	A-B	dark	test	A	B	testA-B	15	482.447	653.605	385	613	51
22	64	B	1	4055	4055	131	A-B	dark	test	A	B	testA-B	16	307.284	995.922	254	949	24
23	1	B	1	1635	1635	498	A-B	light	learning	A	B	learning	1	956	536	890	498	7
23	2	B	1	2679	2679	397	A-B	light	learning	A	B	learning	2	584	445	544	397	9
23	3	A	1	1104	1104	403	A-B	light	learning	A	B	learning	3	1019	463	969	403	54
23	4	A	1	3199	3199	365	A-B	light	learning	A	B	learning	4	1227	773	1161	715	32
23	5	A	1	2274	2274	228	A-B	light	learning	A	B	learning	5	317	844	279	852	30
23	6	B	1	1773	1773	353	A-B	light	learning	A	B	learning	6	1622	561	1567	497	1
23	7	B	1	3378	3378	148	A-B	light	learning	A	B	learning	7	1505	200	1447	148	26
23	8	A	1	3123	3123	136	A-B	light	learning	A	B	learning	8	249	988	176	944	19
23	9	A	1	6863	6863	231	A-B	light	learning	A	B	learning	9	1031	902	967	849	55
23	10	B	1	1662	1662	219	A-B	light	learning	A	B	learning	10	1025	236	952	219	15
23	11	B	1	1214	1214	505	A-B	light	learning	A	B	learning	11	601	579	525	575	44
23	12	A	1	8204	8204	427	A-B	light	learning	A	B	learning	12	1577	654	1493	610	3
23	13	B	1	7213	7213	139	A-B	light	learning	A	B	learning	13	486	997	413	941	46
23	14	A	1	1138	1138	416	A-B	light	learning	A	B	learning	14	461	534	416	509	33
23	15	A	1	1839	1839	459	A-B	light	learning	A	B	learning	15	1476	663	1408	621	2
23	16	B	1	7327	7327	101	A-B	light	learning	A	B	learning	16	1398	146	1340	101	18
23	17	B	1	2421	2421	475	A-B	light	learning	A	B	learning	17	1136	653	1079	605	38
23	18	A	1	6897	6897	376	A-B	light	learning	A	B	learning	18	1127	430	1081	376	12
23	19	B	1	16968	16968	204	A-B	light	learning	A	B	learning	19	1429	269	1351	204	6
23	20	A	1	2220	2220	149	A-B	light	learning	A	B	learning	20	733	168	660	149	5
23	21	B	1	5267	5267	305	A-B	light	learning	A	B	learning	21	1664	723	1615	706	40
23	22	A	1	1424	1424	385	A-B	light	learning	A	B	learning	22	1237	432	1154	385	22
23	23	A	1	4397	4397	145	A-B	light	learning	A	B	learning	23	382	988	296	935	48
23	24	B	1	1195	1195	272	A-B	light	learning	A	B	learning	24	1451	284	1394	272	37
23	25	A	1	1356	1356	380	A-B	light	learning	A	B	learning	25	428	565	380	532	47
23	26	A	1	4963	4963	270	A-B	light	learning	A	B	learning	26	329	635	270	612	20
23	27	B	1	1234	1234	285	A-B	light	learning	A	B	learning	27	1629	309	1536	285	16
23	28	B	1	1476	1476	255	A-B	light	learning	A	B	learning	28	332	599	255	538	17
23	29	B	1	1516	1516	370	A-B	light	learning	A	B	learning	29	597	756	531	710	39
23	30	A	1	1337	1337	309	A-B	light	learning	A	B	learning	30	1160	348	1094	309	56
23	31	A	1	2613	2613	137	A-B	light	learning	A	B	learning	31	994	160	931	137	34
23	32	B	1	1659	1659	278	A-B	light	learning	A	B	learning	32	1474	326	1438	278	41
23	33	A	0	NA	20000	130	A-B	light	search	A	B	searchA	1	NA	NA	1490	950	3
23	34	A	1	8742	8742	144	A-B	light	search	A	B	searchA	2	244	211	191	144	22
23	35	A	1	1582	1582	501	A-B	light	search	A	B	searchA	3	1130	546	1065	501	8
23	36	A	1	1196	1196	352	A-B	light	search	A	B	searchA	4	1329	396	1267	352	21
23	37	A	1	2500	2500	138	A-B	light	search	A	B	searchA	5	614	190	558	138	28
23	38	A	1	1227	1227	237	A-B	light	search	A	B	searchA	6	848	265	797	237	17
23	39	A	1	1898	1898	346	A-B	light	search	A	B	searchA	7	627	759	555	734	42
23	40	A	1	990	990	344	A-B	light	search	A	B	searchA	8	515	366	461	344	16
23	41	A	1	1152	1152	347	A-B	light	search	A	B	searchA	9	1125	388	1050	347	38
23	42	A	1	1785	1785	248	A-B	light	search	A	B	searchA	10	1460	256	1401	248	12
23	43	A	1	2137	2137	498	A-B	light	search	A	B	searchA	11	1489	566	1422	536	15
23	44	A	1	1525	1525	363	A-B	light	search	A	B	searchA	12	1573	390	1530	363	54
23	45	A	0	NA	20000	218	A-B	light	search	A	B	searchA	13	NA	NA	218	531	30
23	46	A	1	11116	11116	275	A-B	light	search	A	B	searchA	14	1552	829	1502	805	23
23	47	A	1	3575	3575	211	A-B	light	search	A	B	searchA	15	406	260	368	211	40
23	48	A	1	945	945	249	A-B	light	search	A	B	searchA	16	498	298	442	249	49
23	49	B	1	1945	1945	130	A-B	light	test	A	B	testA-B	1	193	967	130	925	19
23	50	B	1	1049	1049	136	A-B	light	test	A	B	testA-B	2	1592	983	1579	944	51
23	51	B	1	1295	1295	459	A-B	light	test	A	B	testA-B	3	1526	578	1461	492	35
23	52	B	1	7714	7714	410	A-B	light	test	A	B	testA-B	4	1577	453	1490	410	7
23	53	B	1	2202	2202	253	A-B	light	test	A	B	testA-B	5	464	906	370	827	9
23	54	B	1	2951	2951	416	A-B	light	test	A	B	testA-B	6	810	465	752	416	5
23	55	B	1	2707	2707	103	A-B	light	test	A	B	testA-B	7	377	154	357	103	18
23	56	B	1	2278	2278	397	A-B	light	test	A	B	testA-B	8	1257	422	1215	397	3
23	57	B	1	3173	3173	223	A-B	light	test	A	B	testA-B	9	421	898	371	857	28
23	58	B	1	8845	8845	384	A-B	light	test	A	B	testA-B	10	1465	421	1388	384	32
23	59	B	1	5142	5142	311	A-B	light	test	A	B	testA-B	11	1680	575	1609	536	46
23	60	B	1	1439	1439	280	A-B	light	test	A	B	testA-B	12	1576	305	1536	280	13
23	61	B	1	2371	2371	79	A-B	light	test	A	B	testA-B	13	788	158	696	79	2
23	62	B	1	1791	1791	466	A-B	light	test	A	B	testA-B	14	1333	514	1267	466	4
23	63	B	1	1166	1166	419	A-B	light	test	A	B	testA-B	15	1292	418	1248	419	27
23	64	B	1	1543	1543	236	A-B	light	test	A	B	testA-B	16	314	615	236	609	44
24	1	B	1	6205	6205	74	A-B	dark	learning	A	B	learning	1	959	127	895	74	49
24	2	B	1	1400	1400	316	A-B	dark	learning	A	B	learning	2	998	346	936	316	34
24	3	A	0	NA	20000	170	A-B	dark	learning	A	B	learning	3	NA	NA	1580	910	46
24	4	A	1	3604	3604	275	A-B	dark	learning	A	B	learning	4	1322	291	1250	275	57
24	5	A	1	16147	16147	283	A-B	dark	learning	A	B	learning	5	1605	294	1548	283	53
24	6	A	1	3169	3169	416	A-B	dark	learning	A	B	learning	6	1464	684	1374	664	37
24	7	B	1	4290	4290	286	A-B	dark	learning	A	B	learning	7	475	843	393	794	32
24	8	B	1	5176	5176	265	A-B	dark	learning	A	B	learning	8	368	786	265	732	54
24	9	A	0	NA	20000	143	A-B	dark	learning	A	B	learning	9	NA	NA	519	937	23
24	10	A	1	3382	3382	172	A-B	dark	learning	A	B	learning	10	1084	214	1006	172	36
24	11	B	1	1153	1153	385	A-B	dark	learning	A	B	learning	11	1016	426	927	385	50
24	12	B	1	1281	1281	428	A-B	dark	learning	A	B	learning	12	519	460	439	428	24
24	13	A	1	3634	3634	168	A-B	dark	learning	A	B	learning	13	445	974	357	912	43
24	14	B	1	1763	1763	505	A-B	dark	learning	A	B	learning	14	545	590	505	545	40
24	15	A	1	2817	2817	149	A-B	dark	learning	A	B	learning	15	1052	995	1013	931	39
24	16	B	1	1750	1750	166	A-B	dark	learning	A	B	learning	16	243	805	166	785	13
24	17	B	1	2297	2297	274	A-B	dark	learning	A	B	learning	17	1724	417	1646	369	48
24	18	A	1	1813	1813	449	A-B	dark	learning	A	B	learning	18	924	707	873	631	29
24	19	B	1	1475	1475	335	A-B	dark	learning	A	B	learning	19	401	431	335	388	31
24	20	A	1	8170	8170	186	A-B	dark	learning	A	B	learning	20	1060	919	994	894	41
24	21	B	1	2260	2260	150	A-B	dark	learning	A	B	learning	21	217	939	150	900	9
24	22	B	1	9930	9930	168	A-B	dark	learning	A	B	learning	22	527	975	463	912	33
24	23	A	1	6351	6351	140	A-B	dark	learning	A	B	learning	23	640	152	579	140	1
24	24	A	1	5457	5457	430	A-B	dark	learning	A	B	learning	24	661	709	593	650	45
24	25	A	1	3647	3647	536	A-B	dark	learning	A	B	learning	25	846	605	744	544	14
24	26	B	1	6985	6985	163	A-B	dark	learning	A	B	learning	26	1484	188	1393	163	16
24	27	B	1	4838	4838	493	A-B	dark	learning	A	B	learning	27	1336	628	1263	587	11
24	28	A	1	4740	4740	447	A-B	dark	learning	A	B	learning	28	1535	653	1460	633	25
24	29	A	1	2044	2044	401	A-B	dark	learning	A	B	learning	29	796	710	731	679	44
24	30	B	1	2923	2923	145	A-B	dark	learning	A	B	learning	30	232	679	145	639	12
24	31	A	1	2291	2291	120	A-B	dark	learning	A	B	learning	31	606	147	573	120	5
24	32	B	1	2569	2569	140	A-B	dark	learning	A	B	learning	32	1409	194	1352	140	22
24	33	A	1	1250	1250	345	A-B	dark	search	A	B	searchA	1	519	400	436	345	27
24	34	A	1	1540	1540	270	A-B	dark	search	A	B	searchA	2	348	537	270	500	28
24	35	A	1	1015	1015	396	A-B	dark	search	A	B	searchA	3	708	415	677	396	7
24	36	A	1	9956	9956	290	A-B	dark	search	A	B	searchA	4	500	807	461	790	53
24	37	A	1	4023	4023	281	A-B	dark	search	A	B	searchA	5	1634	323	1568	281	21
24	38	A	1	1682	1682	495	A-B	dark	search	A	B	searchA	6	1212	529	1148	495	1
24	39	A	1	4234	4234	305	A-B	dark	search	A	B	searchA	7	923	786	846	775	17
24	40	A	1	3537	3537	216	A-B	dark	search	A	B	searchA	8	1245	267	1195	216	32
24	41	A	1	3725	3725	466	A-B	dark	search	A	B	searchA	9	1468	641	1431	614	31
24	42	A	0	NA	20000	464	A-B	dark	search	A	B	searchA	10	NA	NA	1216	616	11
24	43	A	1	8160	8160	282	A-B	dark	search	A	B	searchA	11	1553	859	1508	798	46
24	44	A	1	2135	2135	251	A-B	dark	search	A	B	searchA	12	904	295	847	251	24
24	45	A	1	3199	3199	240	A-B	dark	search	A	B	searchA	13	539	284	475	240	9
24	46	A	1	1608	1608	114	A-B	dark	search	A	B	searchA	14	654	157	591	114	18
24	47	A	1	8831	8831	451	A-B	dark	search	A	B	searchA	15	866	495	809	451	2
24	48	A	1	2318	2318	135	A-B	dark	search	A	B	searchA	16	237	590	135	567	35
24	49	B	1	3307	3307	359	A-B	dark	test	A	B	testA-B	1	1148	407	1108	359	55
24	50	B	1	2472	2472	276	A-B	dark	test	A	B	testA-B	2	643	316	570	276	30
24	51	B	1	1314	1314	314	A-B	dark	test	A	B	testA-B	3	1027	774	987	766	32
24	52	B	1	2213	2213	160	A-B	dark	test	A	B	testA-B	4	260	426	160	402	5
24	53	B	1	2693	2693	143	A-B	dark	test	A	B	testA-B	5	1622	982	1546	937	34
24	54	B	1	1209	1209	350	A-B	dark	test	A	B	testA-B	6	1141	374	1069	350	15
24	55	B	1	1678	1678	312	A-B	dark	test	A	B	testA-B	7	442	813	390	768	14
24	56	B	1	2051	2051	531	A-B	dark	test	A	B	testA-B	8	1279	582	1234	549	25
24	57	B	1	2615	2615	71	A-B	dark	test	A	B	testA-B	9	232	119	155	71	17
24	58	B	1	2053	2053	447	A-B	dark	test	A	B	testA-B	10	600	646	559	633	18
24	59	B	1	5510	5510	331	A-B	dark	test	A	B	testA-B	11	346	708	331	674	49
24	60	B	1	2163	2163	455	A-B	dark	test	A	B	testA-B	12	1224	494	1173	455	20
24	61	B	1	2631	2631	418	A-B	dark	test	A	B	testA-B	13	1557	617	1502	595	22
24	62	B	1	4233	4233	337	A-B	dark	test	A	B	testA-B	14	1126	384	1063	337	39
24	63	B	1	6018	6018	95	A-B	dark	test	A	B	testA-B	15	242	114	169	95	2
24	64	B	1	1346	1346	146	A-B	dark	test	A	B	testA-B	16	249	635	146	629	50
25	1	B	1	2399	2399	291	A-B	light	learning	A	B	learning	1	1394.29	860.797	1334	789	36
25	2	A	1	11406	11406	228	A-B	light	learning	A	B	learning	2	1304.21	897.831	1253	852	41
25	3	B	1	1799	1799	471	A-B	light	learning	A	B	learning	3	546.506	508.471	471	480	25
25	4	A	1	4954	4954	121	A-B	light	learning	A	B	learning	4	917.85	142.132	860	121	13
25	5	B	1	2777	2777	155	A-B	light	learning	A	B	learning	5	1676.55	201.186	1634	155	53
25	6	A	1	9133	9133	471	A-B	light	learning	A	B	learning	6	1180.09	647.6	1128	609	3
25	7	B	1	2969	2969	284	A-B	light	learning	A	B	learning	7	1496.39	327.303	1430	284	52
25	8	A	1	3341	3341	180	A-B	light	learning	A	B	learning	8	1592.47	906.84	1547	900	51
25	9	B	1	1880	1880	227	A-B	light	learning	A	B	learning	9	969.898	878.814	903	853	45
25	10	A	1	1664	1664	403	A-B	light	learning	A	B	learning	10	1063.99	447.414	1008	403	42
25	11	B	1	1220	1220	438	A-B	light	learning	A	B	learning	11	1262.17	674.625	1209	642	22
25	12	A	1	5516	5516	94	A-B	light	learning	A	B	learning	12	1269.18	137.127	1212	94	19
25	13	B	1	1927	1927	373	A-B	light	learning	A	B	learning	13	646.599	752.697	586	707	35
25	14	B	1	2269	2269	101	A-B	light	learning	A	B	learning	14	1307.21	149.138	1250	101	15
25	15	A	1	1370	1370	270	A-B	light	learning	A	B	learning	15	671.622	316.293	607	270	28
25	16	A	1	14219	14219	185	A-B	light	learning	A	B	learning	16	234.217	715.663	185	671	57
25	17	A	1	5012	5012	471	A-B	light	learning	A	B	learning	17	1525.41	545.505	1449	513	48
25	18	B	1	8844	8844	300	A-B	light	learning	A	B	learning	18	1607.49	355.329	1538	300	55
25	19	A	1	6041	6041	409	A-B	light	learning	A	B	learning	19	1157.07	718.665	1114	671	24
25	20	B	1	1619	1619	389	A-B	light	learning	A	B	learning	20	1172.09	722.669	1110	691	50
25	21	B	1	2508	2508	295	A-B	light	learning	A	B	learning	21	1596.48	819.759	1538	785	7
25	22	A	1	1208	1208	329	A-B	light	learning	A	B	learning	22	815.755	368.341	752	329	10
25	23	B	1	4649	4649	336	A-B	light	learning	A	B	learning	23	585.542	759.703	517	744	18
25	24	A	1	5714	5714	243	A-B	light	learning	A	B	learning	24	540.5	297.275	471	243	56
25	25	B	1	2759	2759	130	A-B	light	learning	A	B	learning	25	480.445	970.899	411	950	21
25	26	A	1	3890	3890	252	A-B	light	learning	A	B	learning	26	311.288	846.784	252	802	47
25	27	A	1	3857	3857	424	A-B	light	learning	A	B	learning	27	1458.35	462.428	1392	424	30
25	28	B	1	1536	1536	374	A-B	light	learning	A	B	learning	28	1474.37	416.385	1413	374	8
25	29	A	1	1559	1559	399	A-B	light	learning	A	B	learning	29	1479.37	451.418	1416	399	27
25	30	A	1	6699	6699	130	A-B	light	learning	A	B	learning	30	196.182	407.377	130	381	11
25	31	B	1	2154	2154	366	A-B	light	learning	A	B	learning	31	1408.3	394.365	1348	366	6
25	32	B	1	2973	2973	363	A-B	light	learning	A	B	learning	32	609.564	749.694	541	717	31
25	33	A	1	9132	9132	87	A-B	light	search	A	B	searchA	1	1160.07	127.118	1086	87	3
25	34	A	1	2710	2710	408	A-B	light	search	A	B	searchA	2	1514.4	695.644	1485	672	53
25	35	A	1	4081	4081	83	A-B	light	search	A	B	searchA	3	603.559	116.108	524	83	38
25	36	A	1	3189	3189	149	A-B	light	search	A	B	searchA	4	611.566	971.9	549	931	48
25	37	A	1	10177	10177	84	A-B	light	search	A	B	searchA	5	1413.31	117.108	1353	84	6
25	38	A	1	1457	1457	422	A-B	light	search	A	B	searchA	6	495.459	443.411	422	424	4
25	39	A	1	2193	2193	362	A-B	light	search	A	B	searchA	7	625.579	745.691	567	718	36
25	40	A	1	4000	4000	454	A-B	light	search	A	B	searchA	8	685.635	661.613	616	626	22
25	41	A	1	7618	7618	262	A-B	light	search	A	B	searchA	9	571.529	300.278	512	262	41
25	42	A	1	2044	2044	435	A-B	light	search	A	B	searchA	10	1540.43	613.568	1485	559	56
25	43	A	1	3353	3353	149	A-B	light	search	A	B	searchA	11	591.548	185.172	542	149	45
25	44	A	1	2660	2660	201	A-B	light	search	A	B	searchA	12	256.237	688.638	201	649	31
25	45	A	1	5604	5604	248	A-B	light	search	A	B	searchA	13	998.925	856.793	943	832	40
25	46	A	1	12719	12719	352	A-B	light	search	A	B	searchA	14	1579.46	779.722	1533	728	21
25	47	A	1	1451	1451	249	A-B	light	search	A	B	searchA	15	326.302	452.419	249	420	50
25	48	A	1	6573	6573	221	A-B	light	search	A	B	searchA	16	1384.28	894.828	1337	859	54
25	49	B	1	1450	1450	523	A-B	light	test	A	B	testA-B	1	1137.05	596.552	1077	557	52
25	50	B	1	1877	1877	281	A-B	light	test	A	B	testA-B	2	348.322	491.455	281	462	53
25	51	B	1	11151	11151	188	A-B	light	test	A	B	testA-B	3	251.233	527.488	188	487	13
25	52	B	1	1890	1890	389	A-B	light	test	A	B	testA-B	4	1162.08	438.406	1106	389	28
25	53	B	1	1502	1502	512	A-B	light	test	A	B	testA-B	5	1226.14	537.498	1167	512	47
25	54	B	1	2318	2318	286	A-B	light	test	A	B	testA-B	6	1686.56	398.369	1634	342	6
25	55	B	1	5052	5052	86	A-B	light	test	A	B	testA-B	7	207.192	112.104	164	86	7
25	56	B	1	1407	1407	271	A-B	light	test	A	B	testA-B	8	347.322	449.416	271	413	15
25	57	B	1	1885	1885	72	A-B	light	test	A	B	testA-B	9	418.387	105.097	336	72	50
25	58	B	1	13062	13062	460	A-B	light	test	A	B	testA-B	10	1186.1	649.601	1128	620	26
25	59	B	1	14645	14645	440	A-B	light	test	A	B	testA-B	11	509.472	653.605	440	610	51
25	60	B	1	14271	14271	355	A-B	light	test	A	B	testA-B	12	525.487	777.72	462	725	54
25	61	B	1	1618	1618	522	A-B	light	test	A	B	testA-B	13	1435.33	597.553	1362	558	36
25	62	B	1	5433	5433	316	A-B	light	test	A	B	testA-B	14	1531.42	354.328	1471	316	33
25	63	B	1	7519	7519	344	A-B	light	test	A	B	testA-B	15	554.513	783.726	489	736	43
25	64	B	1	1661	1661	375	A-B	light	test	A	B	testA-B	16	1290.19	419.388	1235	375	1
26	1	A	1	6025	6025	136	A-B	dark	learning	A	B	learning	1	204	954	136	904	13
26	2	B	1	2093	2093	380	A-B	dark	learning	A	B	learning	2	457	742	390	700	32
26	3	A	1	1555	1555	337	A-B	dark	learning	A	B	learning	3	1654	683	1583	655	31
26	4	B	1	2214	2214	80	A-B	dark	learning	A	B	learning	4	377	107	311	80	36
26	5	B	1	8646	8646	255	A-B	dark	learning	A	B	learning	5	978	282	949	255	12
26	6	B	1	1447	1447	127	A-B	dark	learning	A	B	learning	6	1439	169	1382	127	28
26	7	A	1	1477	1477	65	A-B	dark	learning	A	B	learning	7	1671	116	1605	65	16
26	8	A	1	1113	1113	491	A-B	dark	learning	A	B	learning	8	809	504	725	491	48
26	9	A	1	8825	8825	280	A-B	dark	learning	A	B	learning	9	476	311	396	280	7
26	10	B	1	4696	4696	460	A-B	dark	learning	A	B	learning	10	1379	667	1283	620	21
26	11	A	1	1032	1032	138	A-B	dark	learning	A	B	learning	11	1046	163	982	138	33
26	12	B	1	4522	4522	154	A-B	dark	learning	A	B	learning	12	1674	191	1585	154	37
26	13	A	1	2451	2451	493	A-B	dark	learning	A	B	learning	13	606	583	540	587	5
26	14	B	1	1094	1094	131	A-B	dark	learning	A	B	learning	14	1456	127	1436	131	10
26	16	B	1	690	690	510	A-B	dark	learning	A	B	learning	16	1116	545	1067	510	2
26	17	A	1	3489	3489	522	A-B	dark	learning	A	B	learning	17	747	570	651	558	1
26	18	B	1	2126	2126	132	A-B	dark	learning	A	B	learning	18	1111	967	1067	948	19
26	19	A	1	3148	3148	79	A-B	dark	learning	A	B	learning	19	1568	121	1515	79	40
26	20	B	1	1127	1127	64	A-B	dark	learning	A	B	learning	20	1174	118	1094	64	11
26	21	B	1	1147	1147	292	A-B	dark	learning	A	B	learning	21	1262	823	1165	788	4
26	22	A	1	1306	1306	363	A-B	dark	learning	A	B	learning	22	1379	756	1326	717	8
26	23	A	1	3354	3354	268	A-B	dark	learning	A	B	learning	23	820	802	764	812	24
26	25	A	1	838	838	180	A-B	dark	learning	A	B	learning	25	1621	209	1525	180	42
26	26	B	1	1807	1807	488	A-B	dark	learning	A	B	learning	26	663	624	562	592	55
26	27	A	1	1456	1456	75	A-B	dark	learning	A	B	learning	27	1536	124	1473	75	30
26	28	B	1	3935	3935	231	A-B	dark	learning	A	B	learning	28	1228	905	1168	849	27
26	29	B	1	993	993	84	A-B	dark	learning	A	B	learning	29	331	119	238	84	50
26	30	B	1	1750	1750	253	A-B	dark	learning	A	B	learning	30	1024	880	964	827	51
26	31	A	1	1588	1588	482	A-B	dark	learning	A	B	learning	31	913	614	830	598	23
26	32	A	1	2648	2648	294	A-B	dark	learning	A	B	learning	32	1322	839	1253	786	20
26	33	A	1	1080	1080	150	A-B	dark	search	A	B	searchA	1	754	218	688	150	51
26	34	A	1	1100	1100	457	A-B	dark	search	A	B	searchA	2	1476	479	1412	457	21
26	35	A	1	2294	2294	184	A-B	dark	search	A	B	searchA	3	635	219	570	184	49
26	36	A	1	4083	4083	398	A-B	dark	search	A	B	searchA	4	596	723	508	682	57
26	37	A	1	3119	3119	288	A-B	dark	search	A	B	searchA	5	507	844	431	792	29
26	38	A	1	8513	8513	170	A-B	dark	search	A	B	searchA	6	1097	947	1007	910	19
26	39	A	1	2996	2996	140	A-B	dark	search	A	B	searchA	7	1494	960	1417	940	13
26	40	A	1	893	893	254	A-B	dark	search	A	B	searchA	8	913	280	848	254	7
26	41	A	1	13353	13353	440	A-B	dark	search	A	B	searchA	9	539	710	510	640	33
26	42	A	1	1691	1691	193	A-B	dark	search	A	B	searchA	10	992	216	924	193	18
26	43	A	1	13714	13714	141	A-B	dark	search	A	B	searchA	11	1649	973	1607	939	2
26	44	A	1	1802	1802	266	A-B	dark	search	A	B	searchA	12	1243	315	1170	266	15
26	45	A	1	1345	1345	481	A-B	dark	search	A	B	searchA	13	1469	517	1402	481	9
26	46	A	0	NA	20000	162	A-B	dark	search	A	B	searchA	14	NA	NA	1159	918	35
26	47	A	1	3034	3034	254	A-B	dark	search	A	B	searchA	15	1635	874	1574	826	4
26	48	A	1	3299	3299	433	A-B	dark	search	A	B	searchA	16	1489	725	1401	647	37
26	49	B	1	1431	1431	379	A-B	dark	test	A	B	testA-B	1	1178	710	1125	701	7
26	50	B	1	9409	9409	207	A-B	dark	test	A	B	testA-B	2	1671	253	1607	207	26
26	51	B	1	1068	1068	193	A-B	dark	test	A	B	testA-B	3	1547	236	1480	193	57
26	52	B	1	884	884	172	A-B	dark	test	A	B	testA-B	4	734	198	679	172	15
26	53	B	1	1575	1575	250	A-B	dark	test	A	B	testA-B	5	1044	857	968	830	8
26	54	B	1	2194	2194	330	A-B	dark	test	A	B	testA-B	6	1416	828	1341	750	55
26	55	B	1	3364	3364	314	A-B	dark	test	A	B	testA-B	7	413	615	314	575	34
26	56	B	1	8478	8478	129	A-B	dark	test	A	B	testA-B	8	241	987	157	951	45
26	57	B	1	8587	8587	403	A-B	dark	test	A	B	testA-B	9	1181	704	1092	677	24
26	58	B	1	1740	1740	143	A-B	dark	test	A	B	testA-B	10	1396	202	1320	143	11
26	59	B	1	1712	1712	143	A-B	dark	test	A	B	testA-B	11	1550	947	1532	937	13
26	60	B	1	2943	2943	114	A-B	dark	test	A	B	testA-B	12	801	194	710	114	1
26	61	B	1	1210	1210	204	A-B	dark	test	A	B	testA-B	13	712	229	635	204	4
26	62	B	1	1326	1326	492	A-B	dark	test	A	B	testA-B	14	591	586	534	588	47
26	63	B	1	4399	4399	348	A-B	dark	test	A	B	testA-B	15	950	773	898	732	3
26	64	B	1	963	963	499	A-B	dark	test	A	B	testA-B	16	921	522	845	499	38
27	1	B	1	1653	1653	212	A-B	light	learning	A	B	learning	1	1203	255	1127	212	50
27	2	A	1	7904	7904	348	A-B	light	learning	A	B	learning	2	908	765	844	732	52
27	3	B	1	3785	3785	379	A-B	light	learning	A	B	learning	3	1579	629	1541	605	11
27	4	A	1	2831	2831	492	A-B	light	learning	A	B	learning	4	1449	609	1388	588	29
27	5	A	1	4197	4197	247	A-B	light	learning	A	B	learning	5	290	697	247	682	47
27	6	B	1	1356	1356	510	A-B	light	learning	A	B	learning	6	1214	538	1160	510	10
27	7	B	1	3469	3469	141	A-B	light	learning	A	B	learning	7	1723	1006	1641	939	27
27	8	A	1	12878	12878	216	A-B	light	learning	A	B	learning	8	288	324	216	300	30
27	9	B	1	7372	7372	150	A-B	light	learning	A	B	learning	9	733	972	679	930	41
27	10	B	1	2179	2179	475	A-B	light	learning	A	B	learning	10	1377	633	1333	605	1
27	11	A	1	1641	1641	73	A-B	light	learning	A	B	learning	11	552	116	486	73	15
27	12	A	1	15045	15045	280	A-B	light	learning	A	B	learning	12	1701	694	1640	638	54
27	13	B	1	1051	1051	126	A-B	light	learning	A	B	learning	13	859	153	800	126	53
27	14	A	1	7402	7402	289	A-B	light	learning	A	B	learning	14	363	385	289	346	24
27	15	B	1	2751	2751	257	A-B	light	learning	A	B	learning	15	1445	827	1399	823	40
27	16	A	1	4578	4578	181	A-B	light	learning	A	B	learning	16	528	955	442	899	9
27	17	B	1	11835	11835	216	A-B	light	learning	A	B	learning	17	1139	252	1094	216	31
27	18	A	1	8678	8678	224	A-B	light	learning	A	B	learning	18	705	901	617	856	37
27	19	A	1	3573	3573	294	A-B	light	learning	A	B	learning	19	613	797	526	786	49
27	20	B	1	2229	2229	159	A-B	light	learning	A	B	learning	20	248	901	159	871	57
27	21	A	1	6871	6871	128	A-B	light	learning	A	B	learning	21	451	953	375	952	44
27	22	A	1	1002	1002	254	A-B	light	learning	A	B	learning	22	746	302	691	254	28
27	23	B	1	1631	1631	127	A-B	light	learning	A	B	learning	23	209	733	127	706	25
27	24	B	1	1239	1239	345	A-B	light	learning	A	B	learning	24	545	355	471	345	20
27	25	A	1	4813	4813	204	A-B	light	learning	A	B	learning	25	560	201	457	204	3
27	26	B	1	4267	4267	97	A-B	light	learning	A	B	learning	26	791	174	721	97	51
27	27	B	1	8657	8657	71	A-B	light	learning	A	B	learning	27	1648	132	1599	71	46
27	28	A	1	9052	9052	364	A-B	light	learning	A	B	learning	28	818	753	755	716	6
27	29	B	1	3564	3564	336	A-B	light	learning	A	B	learning	29	1644	593	1584	590	5
27	30	A	1	6201	6201	318	A-B	light	learning	A	B	learning	30	1255	386	1216	318	26
27	31	B	1	3507	3507	66	A-B	light	learning	A	B	learning	31	622	111	572	66	2
27	32	A	1	2981	2981	272	A-B	light	learning	A	B	learning	32	362	784	272	754	14
27	33	A	1	3650	3650	347	A-B	light	search	A	B	searchA	1	543	807	464	733	35
27	34	A	1	5282	5282	235	A-B	light	search	A	B	searchA	2	1039	864	943	845	49
27	35	A	1	2472	2472	141	A-B	light	search	A	B	searchA	3	227	690	141	636	27
27	36	A	1	3039	3039	237	A-B	light	search	A	B	searchA	4	330	825	237	789	38
27	37	A	1	4304	4304	263	A-B	light	search	A	B	searchA	5	547	282	485	263	37
27	38	A	1	3344	3344	383	A-B	light	search	A	B	searchA	6	753	417	685	383	23
27	39	A	1	1788	1788	241	A-B	light	search	A	B	searchA	7	1312	853	1280	839	40
27	40	A	1	1518	1518	130	A-B	light	search	A	B	searchA	8	209	723	130	679	14
27	41	A	1	6492	6492	395	A-B	light	search	A	B	searchA	9	603	720	556	685	18
27	42	A	1	1122	1122	377	A-B	light	search	A	B	searchA	10	654	734	599	703	24
27	43	A	1	13826	13826	537	A-B	light	search	A	B	searchA	11	1254	562	1176	537	16
27	44	A	1	1130	1130	539	A-B	light	search	A	B	searchA	12	1304	587	1251	539	36
27	45	A	1	1434	1434	504	A-B	light	search	A	B	searchA	13	890	616	822	576	42
27	46	A	1	2125	2125	237	A-B	light	search	A	B	searchA	14	308	628	237	601	54
27	47	A	1	1381	1381	397	A-B	light	search	A	B	searchA	15	628	437	547	397	41
27	48	A	1	5868	5868	129	A-B	light	search	A	B	searchA	16	1443	188	1355	129	12
27	49	B	1	2457	2457	197	A-B	light	test	A	B	testA-B	1	237	279	197	227	38
27	50	B	1	3212	3212	235	A-B	light	test	A	B	testA-B	2	1313	923	1273	845	17
27	51	B	1	1322	1322	472	A-B	light	test	A	B	testA-B	3	1110	642	1048	608	21
27	52	B	1	3245	3245	167	A-B	light	test	A	B	testA-B	4	1355	961	1288	913	11
27	53	B	1	2482	2482	226	A-B	light	test	A	B	testA-B	5	1176	906	1103	854	6
27	54	B	1	11435	11435	91	A-B	light	test	A	B	testA-B	6	1252	110	1186	91	51
27	55	B	1	996	996	259	A-B	light	test	A	B	testA-B	7	628	325	573	259	44
27	56	B	1	3046	3046	385	A-B	light	test	A	B	testA-B	8	1604	652	1535	590	39
27	57	B	1	1188	1188	306	A-B	light	test	A	B	testA-B	9	877	809	818	774	2
27	58	B	1	5311	5311	411	A-B	light	test	A	B	testA-B	10	590	428	537	411	20
27	59	B	1	4517	4517	409	A-B	light	test	A	B	testA-B	11	1578	557	1511	507	41
27	60	B	1	854	854	533	A-B	light	test	A	B	testA-B	12	1087	607	1034	533	57
27	61	B	1	7052	7052	388	A-B	light	test	A	B	testA-B	13	1626	527	1532	506	3
27	62	B	1	1115	1115	515	A-B	light	test	A	B	testA-B	14	975	611	895	565	30
27	63	B	1	2037	2037	270	A-B	light	test	A	B	testA-B	15	1568	849	1547	810	15
27	64	B	1	1199	1199	239	A-B	light	test	A	B	testA-B	16	1266	885	1226	841	40
28	1	A	1	1765	1765	165	A-B	dark	learning	A	B	learning	1	1118	923	1056	915	18
28	2	A	1	1679	1679	294	A-B	dark	learning	A	B	learning	2	1675	376	1626	336	48
28	3	B	1	1421	1421	230	A-B	dark	learning	A	B	learning	3	809	264	759	230	29
28	4	B	1	1756	1756	274	A-B	dark	learning	A	B	learning	4	1703	771	1646	711	54
28	5	B	1	1418	1418	413	A-B	dark	learning	A	B	learning	5	977	702	913	667	16
28	6	A	1	1845	1845	491	A-B	dark	learning	A	B	learning	6	1109	505	1026	491	39
28	7	B	1	1110	1110	189	A-B	dark	learning	A	B	learning	7	847	210	777	189	33
28	8	A	0	NA	20000	256	A-B	dark	learning	A	B	learning	8	NA	NA	1664	325	19
28	9	B	1	1238	1238	408	A-B	dark	learning	A	B	learning	9	641	452	575	408	35
28	10	A	1	1843	1843	517	A-B	dark	learning	A	B	learning	10	1443	545	1396	517	46
28	11	A	1	1468	1468	502	A-B	dark	learning	A	B	learning	11	745	522	680	502	49
28	12	B	1	4448	4448	449	A-B	dark	learning	A	B	learning	12	631	481	565	449	17
28	13	B	1	1300	1300	326	A-B	dark	learning	A	B	learning	13	386	447	326	421	43
28	14	A	1	2164	2164	101	A-B	dark	learning	A	B	learning	14	1045	146	980	101	13
28	15	A	1	1546	1546	355	A-B	dark	learning	A	B	learning	15	669	382	594	355	11
28	16	B	1	1793	1793	341	A-B	dark	learning	A	B	learning	16	1626	663	1579	622	42
28	17	A	1	7145	7145	387	A-B	dark	learning	A	B	learning	17	1620	572	1533	564	6
28	18	B	1	1248	1248	276	A-B	dark	learning	A	B	learning	18	959	317	881	276	22
28	19	B	1	1467	1467	397	A-B	dark	learning	A	B	learning	19	739	437	673	397	55
28	20	A	1	3460	3460	222	A-B	dark	learning	A	B	learning	20	712	898	634	858	23
28	21	A	1	9999	9999	242	A-B	dark	learning	A	B	learning	21	305	671	242	632	41
28	22	B	1	1436	1436	127	A-B	dark	learning	A	B	learning	22	449	182	350	127	20
28	23	B	1	1579	1579	166	A-B	dark	learning	A	B	learning	23	751	198	664	166	53
28	24	A	1	2214	2214	164	A-B	dark	learning	A	B	learning	24	262	353	164	300	2
28	25	B	1	2893	2893	380	A-B	dark	learning	A	B	learning	25	445	735	383	700	32
28	26	B	1	2008	2008	266	A-B	dark	learning	A	B	learning	26	1586	286	1536	266	24
28	27	A	1	2121	2121	227	A-B	dark	learning	A	B	learning	27	301	711	227	668	51
28	28	A	1	4947	4947	286	A-B	dark	learning	A	B	learning	28	1562	827	1530	794	47
28	29	B	1	1281	1281	282	A-B	dark	learning	A	B	learning	29	530	314	463	282	26
28	30	B	1	3051	3051	313	A-B	dark	learning	A	B	learning	30	1471	827	1414	767	7
28	31	A	1	5732	5732	277	A-B	dark	learning	A	B	learning	31	1477	295	1404	277	25
28	32	A	1	4732	4732	207	A-B	dark	learning	A	B	learning	32	309	912	252	873	38
28	33	A	1	1157	1157	313	A-B	dark	search	A	B	searchA	1	1027	354	960	313	52
28	34	A	1	9870	9870	183	A-B	dark	search	A	B	searchA	2	1004	204	928	183	23
28	35	A	1	1624	1624	107	A-B	dark	search	A	B	searchA	3	1561	166	1513	107	8
28	36	A	1	2657	2657	274	A-B	dark	search	A	B	searchA	4	1688	622	1646	608	37
28	37	A	1	1114	1114	280	A-B	dark	search	A	B	searchA	5	645	306	566	280	27
28	38	A	1	2684	2684	186	A-B	dark	search	A	B	searchA	6	1430	952	1405	894	7
28	39	A	1	5564	5564	151	A-B	dark	search	A	B	searchA	7	1677	962	1658	929	28
28	40	A	1	4787	4787	458	A-B	dark	search	A	B	searchA	8	1241	470	1151	458	40
28	41	A	1	3766	3766	267	A-B	dark	search	A	B	searchA	9	1396	304	1324	267	36
28	42	A	1	3956	3956	449	A-B	dark	search	A	B	searchA	10	526	544	449	506	26
28	43	A	1	2102	2102	439	A-B	dark	search	A	B	searchA	11	1237	474	1156	439	47
28	44	A	1	3068	3068	410	A-B	dark	search	A	B	searchA	12	766	712	677	670	38
28	45	A	1	2535	2535	478	A-B	dark	search	A	B	searchA	13	547	606	478	561	46
28	46	A	1	1835	1835	175	A-B	dark	search	A	B	searchA	14	1313	210	1264	175	13
28	47	A	1	1966	1966	337	A-B	dark	search	A	B	searchA	15	821	774	768	743	3
28	48	A	1	3627	3627	501	A-B	dark	search	A	B	searchA	16	902	627	825	579	48
28	49	B	1	2115	2115	159	A-B	dark	test	A	B	testA-B	1	1402	202	1359	159	40
28	50	B	1	1128	1128	170	A-B	dark	test	A	B	testA-B	2	464	221	375	170	13
28	51	B	1	2845	2845	428	A-B	dark	test	A	B	testA-B	3	517	616	428	575	43
28	52	B	1	2830	2830	220	A-B	dark	test	A	B	testA-B	4	1372	905	1288	860	6
28	53	B	1	1126	1126	262	A-B	dark	test	A	B	testA-B	5	816	285	731	262	20
28	54	B	1	2777	2777	86	A-B	dark	test	A	B	testA-B	6	1641	119	1585	86	26
28	55	B	1	1745	1745	263	A-B	dark	test	A	B	testA-B	7	1669	859	1646	817	30
28	56	B	1	1104	1104	183	A-B	dark	test	A	B	testA-B	8	766	211	690	183	47
28	57	B	1	3009	3009	134	A-B	dark	test	A	B	testA-B	9	582	970	500	946	27
28	58	B	1	1404	1404	501	A-B	dark	test	A	B	testA-B	10	785	525	711	501	28
28	59	B	1	1983	1983	377	A-B	dark	test	A	B	testA-B	11	555	742	486	703	23
28	60	B	1	3409	3409	203	A-B	dark	test	A	B	testA-B	12	1185	908	1128	877	38
28	61	B	1	1541	1541	192	A-B	dark	test	A	B	testA-B	13	1475	253	1429	192	8
28	62	B	1	4264	4264	288	A-B	dark	test	A	B	testA-B	14	1695	443	1632	438	21
28	63	B	1	1168	1168	188	A-B	dark	test	A	B	testA-B	15	930	208	843	188	10
28	64	B	1	1152	1152	310	A-B	dark	test	A	B	testA-B	16	393	337	321	310	54
29	1	A	1	4500	4500	70	A-B	light	learning	A	B	learning	1	773	125	718	70	54
29	2	B	1	1629	1629	367	A-B	light	learning	A	B	learning	2	1365	421	1311	367	17
29	3	A	1	2094	2094	413	A-B	light	learning	A	B	learning	3	1090	724	1023	667	46
29	4	B	1	2596	2596	168	A-B	light	learning	A	B	learning	4	219	563	168	547	31
29	5	B	1	3296	3296	195	A-B	light	learning	A	B	learning	5	704	225	647	195	23
29	6	A	1	7951	7951	134	A-B	light	learning	A	B	learning	6	910	192	857	134	12
29	7	A	1	5636	5636	278	A-B	light	learning	A	B	learning	7	507	302	432	278	24
29	8	B	1	2530	2530	294	A-B	light	learning	A	B	learning	8	731	813	660	786	35
29	9	A	1	1858	1858	228	A-B	light	learning	A	B	learning	9	1605	884	1560	852	57
29	10	B	1	1123	1123	464	A-B	light	learning	A	B	learning	10	1211	492	1139	464	28
29	11	A	1	7382	7382	153	A-B	light	learning	A	B	learning	11	1468	195	1410	153	43
29	12	B	1	3995	3995	396	A-B	light	learning	A	B	learning	12	1252	716	1206	684	1
29	13	B	1	2446	2446	337	A-B	light	learning	A	B	learning	13	855	758	784	743	30
29	14	A	1	2025	2025	223	A-B	light	learning	A	B	learning	14	812	264	739	223	16
29	15	B	1	9366	9366	244	A-B	light	learning	A	B	learning	15	1403	284	1344	244	55
29	16	A	1	13188	13188	240	A-B	light	learning	A	B	learning	16	1623	878	1579	840	38
29	17	B	1	2222	2222	395	A-B	light	learning	A	B	learning	17	767	715	701	685	19
29	18	A	1	9441	9441	151	A-B	light	learning	A	B	learning	18	203	918	151	892	53
29	19	B	1	4150	4150	98	A-B	light	learning	A	B	learning	19	290	134	216	98	40
29	20	A	1	4663	4663	338	A-B	light	learning	A	B	learning	20	1368	787	1323	742	7
29	21	A	1	2409	2409	72	A-B	light	learning	A	B	learning	21	1344	113	1294	72	8
29	22	B	1	1128	1128	482	A-B	light	learning	A	B	learning	22	918	523	860	482	41
29	23	B	1	1048	1048	307	A-B	light	learning	A	B	learning	23	854	333	798	307	50
29	24	A	1	3255	3255	392	A-B	light	learning	A	B	learning	24	806	731	765	688	52
29	25	A	1	1451	1451	319	A-B	light	learning	A	B	learning	25	1166	360	1125	319	34
29	26	B	1	2539	2539	469	A-B	light	learning	A	B	learning	26	891	659	840	611	2
29	27	B	1	1469	1469	338	A-B	light	learning	A	B	learning	27	485	382	438	338	33
29	28	A	1	2393	2393	372	A-B	light	learning	A	B	learning	28	845	736	793	708	15
29	29	B	1	5823	5823	372	A-B	light	learning	A	B	learning	29	433	568	372	524	20
29	30	B	1	2957	2957	469	A-B	light	learning	A	B	learning	30	738	491	690	469	48
29	31	A	1	1728	1728	435	A-B	light	learning	A	B	learning	31	676	445	621	435	27
29	32	A	1	3344	3344	197	A-B	light	learning	A	B	learning	32	756	913	688	883	6
29	33	A	1	7297	7297	272	A-B	light	search	A	B	searchA	1	1706	369	1648	334	8
29	34	A	1	3111	3111	471	A-B	light	search	A	B	searchA	2	848	492	798	471	56
29	35	A	1	5181	5181	157	A-B	light	search	A	B	searchA	3	881	179	809	157	43
29	36	A	1	7674	7674	75	A-B	light	search	A	B	searchA	4	1534	110	1503	75	21
29	37	A	1	13486	13486	252	A-B	light	search	A	B	searchA	5	1256	838	1192	828	29
29	38	A	1	4761	4761	193	A-B	light	search	A	B	searchA	6	1599	253	1543	193	19
29	39	A	1	6615	6615	132	A-B	light	search	A	B	searchA	7	1267	951	1201	948	34
29	40	A	1	3496	3496	197	A-B	light	search	A	B	searchA	8	701	908	634	883	22
29	41	A	1	5967	5967	194	A-B	light	search	A	B	searchA	9	742	911	670	886	27
29	42	A	1	2749	2749	453	A-B	light	search	A	B	searchA	10	1232	675	1160	627	52
29	43	A	1	5013	5013	178	A-B	light	search	A	B	searchA	11	920	203	856	178	4
29	44	A	1	3047	3047	247	A-B	light	search	A	B	searchA	12	317	860	247	816	53
29	45	A	1	1240	1240	478	A-B	light	search	A	B	searchA	13	690	508	614	478	10
29	46	A	1	2899	2899	474	A-B	light	search	A	B	searchA	14	724	660	665	606	26
29	47	A	1	3472	3472	186	A-B	light	search	A	B	searchA	15	1406	923	1350	894	1
29	48	A	1	2028	2028	122	A-B	light	search	A	B	searchA	16	1275	172	1213	122	11
29	49	B	1	7125	7125	98	A-B	light	test	A	B	testA-B	1	1199	126	1139	98	41
29	50	B	1	3363	3363	322	A-B	light	test	A	B	testA-B	2	1573	795	1505	758	43
29	51	B	1	3782	3782	344	A-B	light	test	A	B	testA-B	3	509	765	442	736	31
29	52	B	1	1553	1553	401	A-B	light	test	A	B	testA-B	4	1110	442	1033	401	45
29	53	B	1	7331	7331	208	A-B	light	test	A	B	testA-B	5	377	225	310	208	26
29	54	B	1	1601	1601	282	A-B	light	test	A	B	testA-B	6	358	300	300	282	16
29	55	B	1	5140	5140	311	A-B	light	test	A	B	testA-B	7	1653	561	1609	491	29
29	56	B	1	1277	1277	140	A-B	light	test	A	B	testA-B	8	1286	179	1221	140	13
29	57	B	1	3353	3353	448	A-B	light	test	A	B	testA-B	9	1185	674	1111	632	20
29	58	B	1	1773	1773	290	A-B	light	test	A	B	testA-B	10	1678	487	1630	434	38
29	59	B	1	1286	1286	192	A-B	light	test	A	B	testA-B	11	768	209	704	192	19
29	60	B	1	1426	1426	305	A-B	light	test	A	B	testA-B	12	1218	354	1161	305	47
29	61	B	1	2170	2170	326	A-B	light	test	A	B	testA-B	13	434	788	382	754	57
29	62	B	1	1209	1209	347	A-B	light	test	A	B	testA-B	14	779	775	718	733	37
29	63	B	1	1815	1815	228	A-B	light	test	A	B	testA-B	15	303	537	228	497	34
29	64	B	1	2152	2152	244	A-B	light	test	A	B	testA-B	16	495	862	450	836	3
30	1	A	0	NA	20000	300	A-B	dark	learning	A	B	learning	1	NA	NA	300	658	9
30	2	B	1	1470	1470	492	A-B	dark	learning	A	B	learning	2	880	542	819	492	28
30	3	B	1	7706	7706	182	A-B	dark	learning	A	B	learning	3	270	365	182	341	10
30	4	A	1	6403	6403	181	A-B	dark	learning	A	B	learning	4	247	214	181	188	11
30	5	A	1	2283	2283	214	A-B	dark	learning	A	B	learning	5	997	905	951	866	4
30	6	B	1	1038	1038	268	A-B	dark	learning	A	B	learning	6	320	538	268	501	20
30	7	B	1	1817	1817	514	A-B	dark	learning	A	B	learning	7	1242	596	1207	566	40
30	8	A	1	3841	3841	464	A-B	dark	learning	A	B	learning	8	1208	486	1126	464	19
30	9	B	1	5330	5330	135	A-B	dark	learning	A	B	learning	9	768	967	695	945	39
30	10	A	1	3076	3076	473	A-B	dark	learning	A	B	learning	10	633	607	575	607	50
30	11	A	1	4012	4012	443	A-B	dark	learning	A	B	learning	11	642	639	610	637	23
30	12	B	1	1701	1701	412	A-B	dark	learning	A	B	learning	12	1553	673	1508	632	49
30	13	A	1	1178	1178	441	A-B	dark	learning	A	B	learning	13	1128	480	1104	441	56
30	14	B	1	1640	1640	287	A-B	dark	learning	A	B	learning	14	336	527	287	469	45
30	15	A	1	1124	1124	243	A-B	dark	learning	A	B	learning	15	1130	241	1071	243	2
30	16	B	1	1048	1048	200	A-B	dark	learning	A	B	learning	16	270	516	200	479	41
30	17	A	1	5584	5584	107	A-B	dark	learning	A	B	learning	17	467	179	414	107	44
30	18	B	1	10528	10528	352	A-B	dark	learning	A	B	learning	18	452	376	377	352	42
30	19	B	1	941	941	514	A-B	dark	learning	A	B	learning	19	1142	629	1066	566	51
30	20	A	1	3460	3460	237	A-B	dark	learning	A	B	learning	20	589	889	525	843	54
30	21	B	1	4131	4131	141	A-B	dark	learning	A	B	learning	21	1275	967	1244	939	24
30	22	A	1	1452	1452	221	A-B	dark	learning	A	B	learning	22	1286	895	1217	859	33
30	23	A	1	17272	17272	368	A-B	dark	learning	A	B	learning	23	653	398	595	368	35
30	24	B	1	4087	4087	112	A-B	dark	learning	A	B	learning	24	918	148	849	112	7
30	25	A	1	2417	2417	219	A-B	dark	learning	A	B	learning	25	276	506	219	478	47
30	26	B	1	1627	1627	154	A-B	dark	learning	A	B	learning	26	206	820	154	806	43
30	27	B	1	2227	2227	119	A-B	dark	learning	A	B	learning	27	1584	135	1502	119	1
30	28	A	1	1478	1478	160	A-B	dark	learning	A	B	learning	28	218	600	160	573	27
30	29	B	1	8464	8464	167	A-B	dark	learning	A	B	learning	29	1140	217	1085	167	6
30	30	A	1	6666	6666	291	A-B	dark	learning	A	B	learning	30	1689	683	1629	622	52
30	31	B	1	1670	1670	133	A-B	dark	learning	A	B	learning	31	516	181	451	133	38
30	32	A	1	5100	5100	426	A-B	dark	learning	A	B	learning	32	498	638	426	583	55
30	33	A	1	2050	2050	536	A-B	dark	search	A	B	searchA	1	788	596	733	544	14
30	34	A	1	6836	6836	103	A-B	dark	search	A	B	searchA	2	671	94	592	103	53
30	35	A	1	5212	5212	192	A-B	dark	search	A	B	searchA	3	731	917	644	888	27
30	36	A	1	8292	8292	460	A-B	dark	search	A	B	searchA	4	818	682	794	620	21
30	37	A	1	3655	3655	404	A-B	dark	search	A	B	searchA	5	1000	447	920	404	1
30	38	A	1	3212	3212	179	A-B	dark	search	A	B	searchA	6	1289	932	1234	901	40
30	39	A	1	3008	3008	241	A-B	dark	search	A	B	searchA	7	1414	278	1369	241	2
30	40	A	1	2878	2878	464	A-B	dark	search	A	B	searchA	8	685	618	646	616	50
30	41	A	1	1008	1008	489	A-B	dark	search	A	B	searchA	9	575	638	489	587	31
30	42	A	1	3657	3657	462	A-B	dark	search	A	B	searchA	10	1106	675	1021	618	3
30	43	A	1	1680	1680	315	A-B	dark	search	A	B	searchA	11	721	362	661	315	57
30	44	A	1	1149	1149	535	A-B	dark	search	A	B	searchA	12	898	556	825	545	52
30	45	A	1	2844	2844	163	A-B	dark	search	A	B	searchA	13	1052	969	999	917	11
30	46	A	1	1108	1108	200	A-B	dark	search	A	B	searchA	14	459	896	404	880	25
30	47	A	1	1852	1852	154	A-B	dark	search	A	B	searchA	15	215	482	154	447	18
30	48	A	1	1717	1717	155	A-B	dark	search	A	B	searchA	16	992	983	926	925	49
30	49	B	1	5007	5007	69	A-B	dark	test	A	B	testA-B	1	420	117	363	69	54
30	50	B	1	2053	2053	218	A-B	dark	test	A	B	testA-B	2	763	248	695	218	56
30	51	B	1	1907	1907	143	A-B	dark	test	A	B	testA-B	3	194	348	143	297	16
30	52	B	1	1004	1004	265	A-B	dark	test	A	B	testA-B	4	350	396	265	371	51
30	53	B	1	789	789	270	A-B	dark	test	A	B	testA-B	5	639	312	571	270	53
30	54	B	1	3311	3311	204	A-B	dark	test	A	B	testA-B	6	922	241	869	204	8
30	55	B	1	6012	6012	266	A-B	dark	test	A	B	testA-B	7	1125	327	1059	266	31
30	56	B	1	889	889	385	A-B	dark	test	A	B	testA-B	8	631	745	540	695	48
30	57	B	1	776	776	334	A-B	dark	test	A	B	testA-B	9	410	595	334	544	4
30	58	B	1	1773	1773	164	A-B	dark	test	A	B	testA-B	10	924	970	836	916	18
30	59	B	1	1607	1607	404	A-B	dark	test	A	B	testA-B	11	1534	585	1516	532	44
30	60	B	1	833	833	203	A-B	dark	test	A	B	testA-B	12	775	918	707	877	19
30	61	B	1	793	793	463	A-B	dark	test	A	B	testA-B	13	907	511	824	463	2
30	62	B	1	640	640	485	A-B	dark	test	A	B	testA-B	14	1011	546	925	485	34
30	63	B	1	1209	1209	286	A-B	dark	test	A	B	testA-B	15	1529	847	1520	794	14
30	64	B	1	1870	1870	319	A-B	dark	test	A	B	testA-B	16	1672	517	1601	478	30
31	1	A	1	1439	1439	331	A-B	light	learning	A	B	learning	1	1041	363	979	331	30
31	2	B	1	2839	2839	228	A-B	light	learning	A	B	learning	2	880	892	813	852	15
31	3	B	1	5332	5332	161	A-B	light	learning	A	B	learning	3	223	282	161	245	34
31	4	A	1	10051	10051	359	A-B	light	learning	A	B	learning	4	1511	732	1456	721	19
31	5	B	1	2841	2841	443	A-B	light	learning	A	B	learning	5	848	675	789	637	7
31	6	B	1	1815	1815	422	A-B	light	learning	A	B	learning	6	584	693	504	658	28
31	7	A	1	1690	1690	523	A-B	light	learning	A	B	learning	7	935	606	863	557	50
31	8	A	1	16107	16107	449	A-B	light	learning	A	B	learning	8	572	676	489	631	33
31	9	B	1	3187	3187	217	A-B	light	learning	A	B	learning	9	1438	887	1386	863	2
31	10	A	1	1140	1140	332	A-B	light	learning	A	B	learning	10	1086	778	1020	748	49
31	11	B	1	3387	3387	81	A-B	light	learning	A	B	learning	11	715	111	645	81	56
31	12	A	1	5348	5348	200	A-B	light	learning	A	B	learning	12	1697	239	1634	200	3
31	13	A	1	8955	8955	141	A-B	light	learning	A	B	learning	13	207	919	141	911	22
31	14	A	1	10470	10470	448	A-B	light	learning	A	B	learning	14	1107	475	1056	448	10
31	15	B	1	2026	2026	403	A-B	light	learning	A	B	learning	15	1563	718	1517	666	44
31	16	B	1	3073	3073	105	A-B	light	learning	A	B	learning	16	222	129	144	105	25
31	17	A	1	3183	3183	282	A-B	light	learning	A	B	learning	17	1359	343	1301	282	26
31	18	B	1	5202	5202	167	A-B	light	learning	A	B	learning	18	861	932	804	913	13
31	19	A	1	2101	2101	301	A-B	light	learning	A	B	learning	19	937	805	878	779	27
31	20	B	1	1149	1149	338	A-B	light	learning	A	B	learning	20	1135	788	1060	742	20
31	21	A	1	5083	5083	270	A-B	light	learning	A	B	learning	21	1700	693	1650	644	29
31	22	A	1	3160	3160	449	A-B	light	learning	A	B	learning	22	1441	660	1380	631	9
31	23	B	1	14888	14888	209	A-B	light	learning	A	B	learning	23	1159	224	1084	209	45
31	24	B	1	2151	2151	224	A-B	light	learning	A	B	learning	24	1477	886	1447	856	16
31	25	A	1	6357	6357	215	A-B	light	learning	A	B	learning	25	467	886	402	865	46
31	26	B	1	1142	1142	246	A-B	light	learning	A	B	learning	26	1099	292	1036	246	43
31	27	B	1	4019	4019	343	A-B	light	learning	A	B	learning	27	1631	754	1577	697	5
31	28	A	1	4307	4307	268	A-B	light	learning	A	B	learning	28	1524	317	1463	268	36
31	29	B	1	1031	1031	376	A-B	light	learning	A	B	learning	29	1012	387	960	376	47
31	30	A	1	10493	10493	188	A-B	light	learning	A	B	learning	30	1351	250	1288	188	18
31	31	A	1	2011	2011	425	A-B	light	learning	A	B	learning	31	500	466	429	425	35
31	32	B	1	1907	1907	430	A-B	light	learning	A	B	learning	32	1425	694	1387	650	31
31	33	A	1	10442	10442	408	A-B	light	search	A	B	searchA	1	532	681	461	672	44
31	34	A	1	1624	1624	436	A-B	light	search	A	B	searchA	2	1016	680	947	644	24
31	35	A	1	953	953	522	A-B	light	search	A	B	searchA	3	779	550	708	522	36
31	36	A	0	NA	20000	163	A-B	light	search	A	B	searchA	4	NA	NA	1234	917	29
31	37	A	1	2739	2739	74	A-B	light	search	A	B	searchA	5	821	95	780	74	41
31	38	A	1	7610	7610	206	A-B	light	search	A	B	searchA	6	524	897	458	874	46
31	39	A	1	3111	3111	151	A-B	light	search	A	B	searchA	7	1607	179	1547	151	33
31	40	A	1	3479	3479	226	A-B	light	search	A	B	searchA	8	1292	876	1247	854	17
31	41	A	1	2882	2882	156	A-B	light	search	A	B	searchA	9	876	209	825	156	55
31	42	A	1	11911	11911	351	A-B	light	search	A	B	searchA	10	1612	551	1569	515	32
31	43	A	1	2432	2432	140	A-B	light	search	A	B	searchA	11	189	671	140	657	8
31	44	A	1	2814	2814	373	A-B	light	search	A	B	searchA	12	497	419	422	373	10
31	45	A	1	14441	14441	373	A-B	light	search	A	B	searchA	13	1049	722	967	707	52
31	46	A	1	1292	1292	501	A-B	light	search	A	B	searchA	14	1073	635	1015	579	45
31	47	A	1	4499	4499	412	A-B	light	search	A	B	searchA	15	886	702	817	668	30
31	48	A	1	2799	2799	76	A-B	light	search	A	B	searchA	16	732	103	686	76	35
31	49	B	1	1079	1079	224	A-B	light	test	A	B	testA-B	1	866	242	812	224	27
31	50	B	1	1522	1522	128	A-B	light	test	A	B	testA-B	2	219	172	133	128	2
31	51	B	1	4522	4522	475	A-B	light	test	A	B	testA-B	3	592	516	542	475	6
31	52	B	1	1877	1877	333	A-B	light	test	A	B	testA-B	4	1649	514	1587	478	16
31	53	B	1	8755	8755	458	A-B	light	test	A	B	testA-B	5	1402	506	1338	458	40
31	54	B	1	2978	2978	252	A-B	light	test	A	B	testA-B	6	315	649	252	641	36
31	55	B	1	7071	7071	210	A-B	light	test	A	B	testA-B	7	931	907	893	870	29
31	56	B	1	2744	2744	344	A-B	light	test	A	B	testA-B	8	1634	694	1576	648	52
31	57	B	1	1244	1244	478	A-B	light	test	A	B	testA-B	9	567	507	517	478	14
31	58	B	1	3883	3883	337	A-B	light	test	A	B	testA-B	10	1005	783	949	743	22
31	59	B	1	3132	3132	163	A-B	light	test	A	B	testA-B	11	472	954	384	917	13
31	60	B	1	2694	2694	69	A-B	light	test	A	B	testA-B	12	956	115	899	69	55
31	61	B	1	1653	1653	164	A-B	light	test	A	B	testA-B	13	280	934	224	916	34
31	62	B	1	4544	4544	113	A-B	light	test	A	B	testA-B	14	1172	125	1110	113	1
31	63	B	1	2126	2126	470	A-B	light	test	A	B	testA-B	15	1130	484	1061	470	48
31	64	B	0	NA	20000	296	A-B	light	test	A	B	testA-B	16	NA	NA	766	784	42
32	1	B	1	5693	5693	314	A-B	dark	learning	A	B	learning	1	1541	805	1478	766	30
32	2	A	1	5641	5641	136	A-B	dark	learning	A	B	learning	2	1394	980	1334	944	22
32	3	B	1	5368	5368	417	A-B	dark	learning	A	B	learning	3	921	465	860	417	4
32	4	A	1	4486	4486	260	A-B	dark	learning	A	B	learning	4	361	842	280	820	54
32	5	A	1	3477	3477	182	A-B	dark	learning	A	B	learning	5	251	799	182	766	40
32	6	B	1	1873	1873	222	A-B	dark	learning	A	B	learning	6	379	897	320	858	20
32	7	B	1	2861	2861	146	A-B	dark	learning	A	B	learning	7	1095	181	1031	146	11
32	8	A	1	5358	5358	154	A-B	dark	learning	A	B	learning	8	932	966	866	926	19
32	9	B	1	2732	2732	286	A-B	dark	learning	A	B	learning	9	1495	338	1425	286	17
32	10	A	1	1609	1609	398	A-B	dark	learning	A	B	learning	10	466	608	398	572	56
32	11	A	1	1558	1558	305	A-B	dark	learning	A	B	learning	11	1022	335	961	305	38
32	12	B	1	1528	1528	242	A-B	dark	learning	A	B	learning	12	973	280	917	242	32
32	13	A	1	3877	3877	387	A-B	dark	learning	A	B	learning	13	481	719	413	693	14
32	14	B	1	4437	4437	143	A-B	dark	learning	A	B	learning	14	1427	197	1356	143	36
32	15	A	1	4163	4163	285	A-B	dark	learning	A	B	learning	15	1571	346	1513	285	12
32	16	B	1	6225	6225	169	A-B	dark	learning	A	B	learning	16	1222	952	1183	911	29
32	17	A	1	5799	5799	114	A-B	dark	learning	A	B	learning	17	826	133	751	114	21
32	18	A	0	NA	20000	304	A-B	dark	learning	A	B	learning	18	NA	NA	304	347	49
32	19	B	1	2476	2476	157	A-B	dark	learning	A	B	learning	19	1618	211	1548	157	7
32	20	B	1	1674	1674	537	A-B	dark	learning	A	B	learning	20	1259	599	1188	537	25
32	21	B	1	1737	1737	245	A-B	dark	learning	A	B	learning	21	310	506	245	471	46
32	22	A	1	1957	1957	530	A-B	dark	learning	A	B	learning	22	1377	576	1321	530	27
32	23	B	1	1718	1718	261	A-B	dark	learning	A	B	learning	23	1192	313	1131	261	47
32	24	A	1	1364	1364	326	A-B	dark	learning	A	B	learning	24	763	353	691	326	3
32	25	A	1	3606	3606	181	A-B	dark	learning	A	B	learning	25	253	659	181	621	5
[truncated: 5,660 more rows]

## Sheet: Exp B Distractive BM data
Participant	slide	mothTreatment	clickDist	hit	time	timeTo20	edgeDist	treatment	inverted	trialPhase	searchTreatment	testTreatment	phaseInc	phaseSlide	ClickX	ClickY	TargetX	TargetY	backgroundID
1	1	B	10.0172	1	15064	15064	131	A-A	light	learning	A	A	learning	1	871.807	172.159	806	131	2
1	2	A	5.0907	1	1852	1852	223	A-A	light	learning	A	A	learning	2	576.534	255.236	508	223	14
1	3	A	25.209	1	1977	1977	97	A-A	light	learning	A	A	learning	3	335.31	147.136	255	97	19
1	4	B	4.0893	1	3370	3370	409	A-A	light	learning	A	A	learning	4	517.479	705.653	452	671	53
1	5	A	12.6017	1	2118	2118	438	A-A	light	learning	A	A	learning	5	996.923	684.634	929	642	50
1	6	B	14.5749	1	1793	1793	482	A-A	light	learning	A	A	learning	6	555.514	555.514	482	513	30
1	7	B	5.4218	1	1345	1345	396	A-A	light	learning	A	A	learning	7	1347.25	710.658	1281	684	49
1	8	A	5.4701	1	2530	2530	286	A-A	light	learning	A	A	learning	8	1446.34	322.298	1380	286	28
1	9	A	8.3424	1	3505	3505	164	A-A	light	learning	A	A	learning	9	752.697	949.88	698	916	26
1	10	B	12.0503	1	1375	1375	387	A-A	light	learning	A	A	learning	10	1584.47	604.56	1533	572	48
1	11	A	21.5697	1	5297	5297	70	A-A	light	learning	A	A	learning	11	523.485	123.114	461	70	13
1	12	B	13.5307	1	3590	3590	221	A-A	light	learning	A	A	learning	12	1382.28	264.245	1312	221	23
1	13	B	11.0386	1	1930	1930	396	A-A	light	learning	A	A	learning	13	467.433	722.669	396	684	33
1	14	A	10.9349	1	1293	1293	500	A-A	light	learning	A	A	learning	14	598.554	615.57	546	580	15
1	15	B	11.5783	1	2546	2546	346	A-A	light	learning	A	A	learning	15	1089.01	776.719	1027	734	3
1	16	A	21.5492	1	4622	4622	332	A-A	light	learning	A	A	learning	16	653.605	800.741	591	748	44
1	17	B	14.3939	1	4405	4405	188	A-A	light	learning	A	A	learning	17	310.287	232.215	240	188	47
1	18	B	11.7223	1	2016	2016	508	A-A	light	learning	A	A	learning	18	1386.28	614.569	1321	572	16
1	19	A	10.2503	1	5799	5799	126	A-A	light	learning	A	A	learning	19	182.169	884.819	126	846	1
1	20	A	24.6382	1	1627	1627	445	A-A	light	learning	A	A	learning	20	1240.15	501.464	1175	445	20
1	21	B	13.5831	1	1706	1706	266	A-A	light	learning	A	A	learning	21	1244.15	311.288	1180	266	42
1	22	B	10.3299	1	4941	4941	227	A-A	light	learning	A	A	learning	22	483.448	891.826	413	853	6
1	23	A	11.54	1	1417	1417	348	A-A	light	learning	A	A	learning	23	995.922	391.362	933	348	8
1	24	A	20.5483	1	1829	1829	214	A-A	light	learning	A	A	learning	24	277.257	274.254	214	222	9
1	25	A	10.1833	1	1517	1517	518	A-A	light	learning	A	A	learning	25	1230.14	594.551	1157	562	40
1	26	B	4.9686	1	3835	3835	188	A-A	light	learning	A	A	learning	26	1675.55	922.855	1617	892	32
1	27	A	20.6439	1	1748	1748	391	A-A	light	learning	A	A	learning	27	722.669	441.409	651	391	12
1	28	B	30.6257	1	6404	6404	170	A-A	light	learning	A	A	learning	28	1736.61	230.213	1663	170	5
1	29	A	10.3811	1	2680	2680	191	A-A	light	learning	A	A	learning	29	327.303	229.212	256	191	43
1	30	B	12.909	1	2758	2758	181	A-A	light	learning	A	A	learning	30	1026.95	225.208	961	181	10
1	31	A	11.7533	1	4779	4779	465	A-A	light	learning	A	A	learning	31	521.483	621.576	465	600	51
1	32	B	58.0358	1	2170	2170	163	A-A	light	learning	A	A	learning	32	297.275	966.895	289	917	55
1	33	A	5.1776	1	1316	1316	123	A-A	light	search	A	A	searchA	1	900.834	156.145	843	123	53
1	34	A	9.3011	1	2183	2183	316	A-A	light	search	A	A	searchA	2	1658.54	390.361	1604	356	47
1	35	A	19.5759	1	1724	1724	467	A-A	light	search	A	A	searchA	3	645.598	663.615	582	613	21
1	36	A	13.4701	1	2897	2897	261	A-A	light	search	A	A	searchA	4	854.792	861.798	799	819	51
1	37	A	12.6232	1	2619	2619	439	A-A	light	search	A	A	searchA	5	1533.42	481.446	1477	439	3
1	38	A	14.2291	1	7018	7018	136	A-A	light	search	A	A	searchA	6	1362.26	982.91	1287	944	46
1	39	A	19.6073	1	2497	2497	130	A-A	light	search	A	A	searchA	7	994.921	166.154	913	130	17
1	40	A	6.9172	1	1625	1625	216	A-A	light	search	A	A	searchA	8	1027.95	251.233	971	216	40
1	41	A	13.5307	1	1502	1502	201	A-A	light	search	A	A	searchA	9	841.779	244.226	772	201	23
1	42	A	20.5929	1	1632	1632	138	A-A	light	search	A	A	searchA	10	203.188	991.918	149	942	11
1	43	A	6.0822	1	2991	2991	288	A-A	light	search	A	A	searchA	11	726.673	822.762	658	792	42
1	44	A	12.8724	1	2347	2347	100	A-A	light	search	A	A	searchA	12	847.785	127.118	773	100	43
1	45	A	12.8818	1	5021	5021	392	A-A	light	search	A	A	searchA	13	1541.43	731.678	1481	688	10
1	46	A	29.6513	1	5151	5151	261	A-A	light	search	A	A	searchA	14	1688.56	877.813	1637	819	5
1	47	A	21.9343	1	5534	5534	105	A-A	light	search	A	A	searchA	15	1187.1	156.145	1134	105	28
1	48	A	5.6606	1	2271	2271	486	A-A	light	search	A	A	searchA	16	1109.03	627.581	1041	594	20
1	49	A	21.0908	1	1202	1202	527	A-A	light	test	A	A	testA-A	1	993.92	571.529	948	527	43
1	50	A	12.4161	1	1418	1418	405	A-A	light	test	A	A	testA-A	2	1186.1	715.663	1131	675	53
1	51	A	14.5427	1	2440	2440	275	A-A	light	test	A	A	testA-A	3	1306.21	850.788	1243	805	28
1	52	A	24.742	1	1570	1570	433	A-A	light	test	A	A	testA-A	4	544.504	489.453	478	433	6
1	53	A	9.4046	1	1968	1968	164	A-A	light	test	A	A	testA-A	5	636.589	955.885	578	916	18
1	54	A	20.3341	1	1478	1478	273	A-A	light	test	A	A	testA-A	6	578.536	314.291	533	273	49
1	55	A	14.6756	1	1858	1858	416	A-A	light	test	A	A	testA-A	7	1576.46	499.462	1504	456	33
1	56	A	17.8105	1	7934	7934	293	A-A	light	test	A	A	testA-A	8	1692.57	665.616	1627	617	29
1	57	A	6.5712	1	13544	13544	140	A-A	light	test	A	A	testA-A	9	1269.18	973.902	1200	940	19
1	58	A	11.1739	1	1517	1517	387	A-A	light	test	A	A	testA-A	10	1121.04	725.672	1047	693	44
1	59	A	6.7095	1	2099	2099	298	A-A	light	test	A	A	testA-A	11	696.645	334.31	639	298	11
1	60	A	7.6102	1	3366	3366	471	A-A	light	test	A	A	testA-A	12	1422.32	510.473	1358	471	42
1	61	A	21.0173	1	5243	5243	317	A-A	light	test	A	A	testA-A	13	890.825	807.748	812	763	15
1	62	A	7.5949	1	1644	1644	405	A-A	light	test	A	A	testA-A	14	869.805	444.411	808	405	38
1	63	A	12.5761	1	2706	2706	331	A-A	light	test	A	A	testA-A	15	1469.36	375.348	1407	331	56
1	64	A	19.529	1	3502	3502	467	A-A	light	test	A	A	testA-A	16	567.525	512.475	490	467	52
2	1	A	20.9668	1	758	758	346	A-A	dark	learning	A	A	learning	1	423.392	500.463	346	453	47
2	4	A	20.2359	1	2331	2331	359	A-A	dark	learning	A	A	learning	4	1493.38	754.699	1410	721	9
2	5	A	6.9172	1	5583	5583	142	A-A	dark	learning	A	A	learning	5	1371.27	972.901	1314	938	17
2	6	A	17.3291	1	3947	3947	248	A-A	dark	learning	A	A	learning	6	474.439	273.253	395	248	19
2	7	B	33.5735	1	4194	4194	87	A-A	dark	learning	A	A	learning	7	1142.06	152.141	1080	87	41
2	8	B	21.1017	1	1305	1305	77	A-A	dark	learning	A	A	learning	8	725.672	128.119	671	77	7
2	9	B	3.0972	1	1480	1480	307	A-A	dark	learning	A	A	learning	9	1270.18	803.744	1204	773	45
2	10	B	29.0891	1	1919	1919	140	A-A	dark	learning	A	A	learning	10	1164.08	994.921	1084	940	5
2	11	A	24.3045	1	963	963	526	A-A	dark	learning	A	A	learning	11	930.862	607.563	859	554	44
2	12	A	58.1099	1	1780	1780	249	A-A	dark	learning	A	A	learning	12	461.427	917.85	415	831	57
2	14	B	23.8393	1	3511	3511	142	A-A	dark	learning	A	A	learning	14	293.272	189.175	212	142	16
2	15	A	8.5064	1	10902	10902	236	A-A	dark	learning	A	A	learning	15	1553.44	275.255	1494	236	31
2	16	B	20.1781	1	2021	2021	183	A-A	dark	learning	A	A	learning	16	1218.13	946.877	1163	897	51
2	17	B	25.6266	1	1377	1377	174	A-A	dark	learning	A	A	learning	17	520.482	962.892	459	906	27
2	18	A	15.7393	1	3232	3232	79	A-A	dark	learning	A	A	learning	18	639.592	115.107	562	79	29
2	19	B	26.4946	1	1426	1426	454	A-A	dark	learning	A	A	learning	19	1229.14	494.458	1141	454	38
2	20	A	27.0852	1	1220	1220	375	A-A	dark	learning	A	A	learning	20	411.381	665.616	375	632	8
2	21	A	28.5037	1	12708	12708	451	A-A	dark	learning	A	A	learning	21	1557.44	566.525	1469	521	22
2	22	B	14.6725	1	2070	2070	186	A-A	dark	learning	A	A	learning	22	235.218	827.766	186	792	14
2	23	A	21.6474	1	1277	1277	462	A-A	dark	learning	A	A	learning	23	527.488	656.608	462	604	30
2	24	B	5.5564	1	3129	3129	408	A-A	dark	learning	A	A	learning	24	1489.38	442.41	1431	408	24
2	25	B	24.5164	1	1222	1222	423	A-A	dark	learning	A	A	learning	25	487.451	612.567	423	606	46
2	26	A	56.1233	1	1463	1463	137	A-A	dark	learning	A	A	learning	26	1120.04	955.885	1110	943	10
2	27	A	32.9906	1	1098	1098	172	A-A	dark	learning	A	A	learning	27	776.719	961.891	690	908	35
2	28	B	10.4715	1	3762	3762	368	A-A	dark	learning	A	A	learning	28	1621.5	449.416	1552	409	20
2	29	A	53.6847	1	1722	1722	270	A-A	dark	learning	A	A	learning	29	1205.12	882.817	1176	810	21
2	30	B	26.4105	1	1767	1767	176	A-A	dark	learning	A	A	learning	30	1578.46	231.214	1527	176	2
2	31	A	24.1256	1	887	887	251	A-A	dark	learning	A	A	learning	31	895.83	281.26	809	251	11
2	32	B	42.1006	1	1725	1725	136	A-A	dark	learning	A	A	learning	32	379.351	975.904	274	944	25
2	33	A	47.0774	1	968	968	194	A-A	dark	search	A	A	searchA	1	303.281	773.716	194	733	2
2	34	A	25.2323	1	698	698	474	A-A	dark	search	A	A	searchA	2	1058.98	644.597	972	606	8
2	35	A	35.0948	1	1636	1636	76	A-A	dark	search	A	A	searchA	3	1158.07	108.1	1060	76	33
2	36	A	22.2274	1	851	851	82	A-A	dark	search	A	A	searchA	4	1136.05	123.114	1053	82	35
2	37	A	11.3415	1	6944	6944	309	A-A	dark	search	A	A	searchA	5	1685.56	703.652	1611	675	41
2	38	A	23.8307	1	3282	3282	344	A-A	dark	search	A	A	searchA	6	537.498	787.729	462	736	28
2	39	A	28.6244	1	1578	1578	263	A-A	dark	search	A	A	searchA	7	354.328	614.569	263	578	30
2	40	A	52.1247	1	1106	1106	333	A-A	dark	search	A	A	searchA	8	666.617	760.704	555	747	31
2	41	A	19.1373	1	1661	1661	155	A-A	dark	search	A	A	searchA	9	1606.49	188.174	1524	155	49
2	42	A	15.6275	1	2606	2606	262	A-A	dark	search	A	A	searchA	10	1705.58	354.328	1658	318	55
2	43	A	17.0806	1	4072	4072	440	A-A	dark	search	A	A	searchA	11	1191.1	670.621	1111	640	38
2	44	A	12.5854	1	953	953	415	A-A	dark	search	A	A	searchA	12	748.693	459.425	685	415	11
2	45	A	14.5731	1	931	931	381	A-A	dark	search	A	A	searchA	13	619.574	427.396	558	381	29
2	46	A	16.0656	1	1620	1620	105	A-A	dark	search	A	A	searchA	14	201.186	152.141	134	105	56
2	47	A	52.3678	1	859	859	418	A-A	dark	search	A	A	searchA	15	994.921	744.689	923	662	24
2	48	A	48.0528	1	1696	1696	86	A-A	dark	search	A	A	searchA	16	145.134	120.111	130	86	53
2	49	A	34.6965	1	1486	1486	152	A-A	dark	test	A	A	testA-A	1	882.817	218.202	817	152	6
2	50	A	7.4852	1	852	852	290	A-A	dark	test	A	A	testA-A	2	786.729	319.296	717	290	24
2	51	A	48.0215	1	2365	2365	538	A-A	dark	test	A	A	testA-A	3	1359.26	542.502	1259	542	51
2	52	A	46.6482	1	1936	1936	309	A-A	dark	test	A	A	testA-A	4	1238.15	817.757	1219	771	4
2	53	A	24.6382	1	1380	1380	349	A-A	dark	test	A	A	testA-A	5	825.765	786.729	761	731	42
2	54	A	15.6795	1	5874	5874	324	A-A	dark	test	A	A	testA-A	6	1469.36	802.743	1404	756	33
2	55	A	13.0911	1	805	805	454	A-A	dark	test	A	A	testA-A	7	853.79	473.438	795	454	38
2	56	A	23.0666	1	1204	1204	450	A-A	dark	test	A	A	testA-A	8	529.49	591.548	450	544	48
2	57	A	8.5064	1	1292	1292	374	A-A	dark	test	A	A	testA-A	9	462.428	744.689	403	706	36
2	58	A	27.0105	1	897	897	242	A-A	dark	test	A	A	testA-A	10	866.803	300.278	809	242	50
2	59	A	17.3221	1	1029	1029	384	A-A	dark	test	A	A	testA-A	11	1077	735.681	999	696	35
2	60	A	30.3622	1	1348	1348	132	A-A	dark	test	A	A	testA-A	12	872.808	1008.93	817	948	40
2	61	A	32.9933	1	1392	1392	297	A-A	dark	test	A	A	testA-A	13	390.361	427.396	297	382	2
2	62	A	31.5203	1	721	721	405	A-A	dark	test	A	A	testA-A	14	1137.05	735.681	1085	675	41
2	63	A	24.4794	1	1019	1019	435	A-A	dark	test	A	A	testA-A	15	615.57	660.612	572	645	39
2	64	A	25.1903	1	1199	1199	471	A-A	dark	test	A	A	testA-A	16	1241.15	657.609	1160	609	23
3	1	A	24.0972	1	1147	1147	502	A-A	light	learning	A	A	learning	1	1128.04	611.566	1089	578	20
3	3	A	10.2906	1	1393	1393	536	A-A	light	learning	A	A	learning	3	700.649	574.532	646	536	25
3	5	B	17.9835	1	1471	1471	215	A-A	light	learning	A	A	learning	5	756.701	264.245	698	215	8
3	6	B	15.7563	1	1391	1391	176	A-A	light	learning	A	A	learning	6	754.699	222.206	686	176	18
3	7	A	37.1835	1	1461	1461	345	A-A	light	learning	A	A	learning	7	1167.08	798.74	1122	735	22
3	8	A	4.6555	1	3032	3032	527	A-A	light	learning	A	A	learning	8	922.855	563.522	859	527	12
3	9	B	29.1924	1	5212	5212	106	A-A	light	learning	A	A	learning	9	206.191	166.154	137	106	45
3	10	A	9.9821	1	6024	6024	306	A-A	light	learning	A	A	learning	10	1436.33	814.754	1376	774	3
3	11	A	14.5731	1	10171	10171	154	A-A	light	learning	A	A	learning	11	696.645	971.9	635	926	51
3	12	B	7.1679	1	980	980	403	A-A	light	learning	A	A	learning	12	727.674	441.409	668	403	16
3	13	A	25.233	1	1763	1763	285	A-A	light	learning	A	A	learning	13	332.308	354.328	285	303	42
3	14	B	10.6592	1	5128	5128	213	A-A	light	learning	A	A	learning	14	839.778	887.822	779	867	44
3	15	B	10.4043	1	1471	1471	338	A-A	light	learning	A	A	learning	15	569.527	781.724	512	742	54
3	16	A	NA	0	timeout	20000	414	A-A	light	learning	A	A	learning	16	NA	NA	1506	620	9
3	18	A	28.7022	1	1875	1875	302	A-A	light	learning	A	A	learning	18	1225.13	355.329	1181	302	30
3	19	B	13.8861	1	6512	6512	483	A-A	light	learning	A	A	learning	19	833.772	636.589	782	597	13
3	20	B	10.0326	1	2146	2146	307	A-A	light	learning	A	A	learning	20	820.76	808.749	767	773	27
3	21	A	12.4638	1	9915	9915	201	A-A	light	learning	A	A	learning	21	732.678	913.846	682	879	2
3	22	B	45.1711	1	12571	12571	182	A-A	light	learning	A	A	learning	22	846.784	963.893	755	898	29
3	23	B	14.0991	1	4500	4500	68	A-A	light	learning	A	A	learning	23	791.733	92.0853	741	68	47
3	24	A	4.3409	1	1086	1086	430	A-A	light	learning	A	A	learning	24	863.8	463.429	797	430	35
3	25	A	14.032	1	5571	5571	367	A-A	light	learning	A	A	learning	25	755.7	742.688	707	713	46
3	26	B	26.522	1	3851	3851	330	A-A	light	learning	A	A	learning	26	1477.37	380.352	1433	330	53
3	27	B	34.3083	1	1058	1058	369	A-A	light	learning	A	A	learning	27	979.907	425.394	941	369	38
3	28	A	8.7555	1	1150	1150	525	A-A	light	learning	A	A	learning	28	1323.23	565.524	1262	525	34
3	29	B	6.141	1	1707	1707	211	A-A	light	learning	A	A	learning	29	598.554	244.226	542	211	52
3	30	A	7.5524	1	1536	1536	186	A-A	light	learning	A	A	learning	30	1371.27	210.195	1307	186	17
3	31	A	17.088	1	11637	11637	130	A-A	light	learning	A	A	learning	31	1326.23	966.895	1254	950	32
3	32	B	15.0336	1	1251	1251	197	A-A	light	learning	A	A	learning	32	486.45	230.213	438	197	43
3	33	A	16.0362	1	5855	5855	374	A-A	light	search	A	A	searchA	1	1053.98	731.678	976	706	12
3	34	A	5.5774	1	967	967	358	A-A	light	search	A	A	searchA	2	876.812	384.356	813	358	53
3	35	A	1.1843	1	4661	4661	106	A-A	light	search	A	A	searchA	3	961.891	138.128	898	106	31
3	36	A	15.5721	1	1878	1878	113	A-A	light	search	A	A	searchA	4	276.256	160.148	214	113	55
3	37	A	7.8127	1	1396	1396	276	A-A	light	search	A	A	searchA	5	341.316	447.414	276	408	56
3	38	A	23.5728	1	1714	1714	304	A-A	light	search	A	A	searchA	6	1538.42	348.322	1495	304	16
3	40	A	23.8987	1	960	960	374	A-A	light	search	A	A	searchA	8	804.745	429.398	738	374	43
3	41	A	13.3906	1	976	976	386	A-A	light	search	A	A	searchA	9	460.426	527.488	386	488	22
3	42	A	16.4568	1	1116	1116	258	A-A	light	search	A	A	searchA	10	1265.17	293.272	1186	258	15
3	43	A	22.6486	1	2162	2162	316	A-A	light	search	A	A	searchA	11	391.362	800.741	350	764	57
3	44	A	16.6985	1	4604	4604	149	A-A	light	search	A	A	searchA	12	335.31	973.902	260	931	17
3	45	A	8.675	1	1796	1796	242	A-A	light	search	A	A	searchA	13	1200.11	865.802	1145	838	11
3	46	A	11.0072	1	1139	1139	213	A-A	light	search	A	A	searchA	14	664.615	253.234	609	213	34
3	47	A	4.6877	1	1394	1394	351	A-A	light	search	A	A	searchA	15	867.803	762.706	809	729	28
3	48	A	3.2188	1	2565	2565	182	A-A	light	search	A	A	searchA	16	851.789	211.196	787	182	47
3	49	A	11.5074	1	2626	2626	181	A-A	light	test	A	A	testA-A	1	1368.27	216.2	1316	181	56
3	50	A	22.1074	1	1771	1771	181	A-A	light	test	A	A	testA-A	2	1386.28	932.864	1345	899	38
3	51	A	11.4816	1	1030	1030	368	A-A	light	test	A	A	testA-A	3	702.651	388.36	640	368	14
3	52	A	21.6437	1	1567	1567	128	A-A	light	test	A	A	testA-A	4	435.403	176.163	386	128	33
3	53	A	3.4745	1	1126	1126	278	A-A	light	test	A	A	testA-A	5	960.89	306.284	898	278	34
3	54	A	23.6204	1	828	828	166	A-A	light	test	A	A	testA-A	6	206.191	591.548	166	555	8
3	55	A	10.5593	1	1316	1316	249	A-A	light	test	A	A	testA-A	7	412.382	284.263	359	249	39
3	56	A	13.8834	1	1929	1929	250	A-A	light	test	A	A	testA-A	8	1351.25	874.81	1285	830	35
3	57	A	7.6338	1	2603	2603	277	A-A	light	test	A	A	testA-A	9	1204.11	840.779	1145	803	4
3	58	A	9.734	1	993	993	193	A-A	light	test	A	A	testA-A	10	572.53	234.217	511	193	52
3	59	A	8.1341	1	2463	2463	400	A-A	light	test	A	A	testA-A	11	1375.27	439.407	1309	400	43
3	60	A	13.9646	1	3800	3800	118	A-A	light	test	A	A	testA-A	12	1560.44	150.139	1511	118	3
3	61	A	6.3245	1	942	942	239	A-A	light	test	A	A	testA-A	13	701.65	276.256	636	239	17
3	62	A	17.9361	1	1782	1782	165	A-A	light	test	A	A	testA-A	14	689.639	961.891	636	915	23
3	63	A	11.6394	1	5788	5788	341	A-A	light	test	A	A	testA-A	15	1532.42	759.703	1464	739	20
3	64	A	51.6677	1	2555	2555	411	A-A	light	test	A	A	testA-A	16	1575.46	558.517	1509	475	46
4	2	B	21.8787	1	1650	1650	158	A-A	dark	learning	A	A	learning	2	570.528	970.899	494	922	20
4	3	A	32.3176	1	1756	1756	470	A-A	dark	learning	A	A	learning	3	1440.33	670.621	1364	610	13
4	4	A	39.2578	1	6509	6509	135	A-A	dark	learning	A	A	learning	4	1275.18	949.88	1241	945	44
4	5	A	11.4885	1	2394	2394	365	A-A	dark	learning	A	A	learning	5	1628.51	505.468	1555	468	3
4	6	B	4.4754	1	2084	2084	229	A-A	dark	learning	A	A	learning	6	1661.54	877.813	1598	851	22
4	7	B	11.5884	1	1526	1526	240	A-A	dark	learning	A	A	learning	7	748.693	283.262	685	240	57
4	8	A	20.2703	1	1746	1746	344	A-A	dark	learning	A	A	learning	8	749.694	379.351	707	344	41
4	9	B	4.6743	1	1409	1409	518	A-A	dark	learning	A	A	learning	9	584.541	553.513	518	518	1
4	10	A	2.4738	1	927	927	522	A-A	dark	learning	A	A	learning	10	773.716	551.511	711	522	49
4	11	B	28.165	1	1184	1184	235	A-A	dark	learning	A	A	learning	11	1735.61	858.795	1651	845	37
4	12	A	16.5713	1	2905	2905	127	A-A	dark	learning	A	A	learning	12	894.828	175.162	833	127	9
4	13	A	11.692	1	1404	1404	368	A-A	dark	learning	A	A	learning	13	1290.19	410.38	1222	368	53
4	14	B	23.1082	1	1064	1064	266	A-A	dark	learning	A	A	learning	14	311.288	758.702	266	713	40
4	15	B	8.7822	1	922	922	510	A-A	dark	learning	A	A	learning	15	717.664	550.51	653	510	6
4	16	A	17.0212	1	1213	1213	390	A-A	dark	learning	A	A	learning	16	478.443	420.389	432	390	7
4	17	B	11.1425	1	2530	2530	226	A-A	dark	learning	A	A	learning	17	310.287	878.814	238	854	18
4	18	A	2.6904	1	1394	1394	491	A-A	dark	learning	A	A	learning	18	1429.32	617.572	1365	589	33
4	19	B	11.4816	1	2803	2803	200	A-A	dark	learning	A	A	learning	19	460.426	899.833	397	880	48
4	20	A	32.1139	1	1369	1369	390	A-A	dark	learning	A	A	learning	20	1271.18	453.42	1214	390	46
4	21	A	42.3362	1	1595	1595	267	A-A	dark	learning	A	A	learning	21	1465.36	838.777	1444	813	30
4	22	A	19.6793	1	991	991	81	A-A	dark	learning	A	A	learning	22	1432.33	128.119	1357	81	21
4	23	B	15.5138	1	1704	1704	351	A-A	dark	learning	A	A	learning	23	1358.26	744.689	1296	729	35
4	24	B	23.8792	1	1412	1412	345	A-A	dark	learning	A	A	learning	24	1634.51	472.437	1575	417	38
4	25	A	9.6001	1	1086	1086	484	A-A	dark	learning	A	A	learning	25	1354.25	523.485	1297	484	50
4	26	B	23.6729	1	1222	1222	315	A-A	dark	learning	A	A	learning	26	362.336	520.482	315	506	36
4	27	A	20.7454	1	823	823	523	A-A	dark	learning	A	A	learning	27	1004.93	574.532	949	523	19
4	28	B	28.9162	1	2519	2519	196	A-A	dark	learning	A	A	learning	28	310.287	887.822	256	884	5
4	29	A	19.4885	1	814	814	379	A-A	dark	learning	A	A	learning	29	1017.94	397.368	941	379	12
4	30	A	12.1404	1	864	864	516	A-A	dark	learning	A	A	learning	30	735.681	536.497	677	516	45
4	31	B	12.4161	1	1316	1316	381	A-A	dark	learning	A	A	learning	31	1594.48	425.394	1539	384	47
4	32	B	17.2608	1	838	838	249	A-A	dark	learning	A	A	learning	32	563.522	283.262	483	249	2
4	33	A	13.1597	1	857	857	458	A-A	dark	search	A	A	searchA	1	530.491	504.467	458	463	48
4	34	A	7.8988	1	939	939	168	A-A	dark	search	A	A	searchA	2	238.221	750.695	168	716	2
4	35	A	35.6545	1	898	898	231	A-A	dark	search	A	A	searchA	3	770.714	895.83	676	849	56
4	36	A	19.7278	1	906	906	268	A-A	dark	search	A	A	searchA	4	1111.03	823.763	1045	812	50
4	37	A	15.0583	1	3315	3315	218	A-A	dark	search	A	A	searchA	5	391.362	242.224	315	218	44
4	38	A	34.0831	1	1895	1895	217	A-A	dark	search	A	A	searchA	6	1683.56	282.261	1627	217	37
4	39	A	23.6729	1	1033	1033	165	A-A	dark	search	A	A	searchA	7	212.196	892.827	165	879	15
4	40	A	5.6348	1	1656	1656	372	A-A	dark	search	A	A	searchA	8	1239.15	409.379	1175	372	1
4	41	A	6.3245	1	1528	1528	392	A-A	dark	search	A	A	searchA	9	1594.48	445.412	1528	408	20
4	42	A	11.0582	1	1124	1124	371	A-A	dark	search	A	A	searchA	10	547.507	741.687	495	709	53
4	43	A	2.1272	1	1308	1308	305	A-A	dark	search	A	A	searchA	11	1396.29	337.312	1331	305	55
4	44	A	13.5242	1	1328	1328	279	A-A	dark	search	A	A	searchA	12	347.322	655.607	279	612	18
4	45	A	15.3537	1	939	939	454	A-A	dark	search	A	A	searchA	13	1143.06	482.447	1095	454	23
4	46	A	15.2834	1	1620	1620	233	A-A	dark	search	A	A	searchA	14	682.632	888.823	609	847	34
4	47	A	4.3409	1	1258	1258	393	A-A	dark	search	A	A	searchA	15	622.577	719.666	556	687	32
4	48	A	6.7095	1	3515	3515	218	A-A	dark	search	A	A	searchA	16	1709.58	897.831	1652	862	31
4	49	A	27.3752	1	961	961	390	A-A	dark	test	A	A	testA-A	1	1227.14	699.648	1181	690	8
4	50	A	30.572	1	1425	1425	523	A-A	dark	test	A	A	testA-A	2	1353.25	618.573	1291	557	30
4	51	A	9.6001	1	842	842	445	A-A	dark	test	A	A	testA-A	3	714.662	673.624	658	635	22
4	52	A	21.7192	1	2214	2214	440	A-A	dark	test	A	A	testA-A	4	517.479	566.525	440	518	38
4	53	A	24.8563	1	1472	1472	272	A-A	dark	test	A	A	testA-A	5	1702.58	329.305	1648	274	37
4	54	A	6.5451	1	988	988	292	A-A	dark	test	A	A	testA-A	6	1073.99	317.294	1012	292	13
4	55	A	25.7874	1	1816	1816	163	A-A	dark	test	A	A	testA-A	7	234.217	556.515	163	550	41
4	56	A	9.0702	1	1169	1169	482	A-A	dark	test	A	A	testA-A	8	1318.22	627.581	1264	598	47
4	57	A	10.9108	1	1195	1195	516	A-A	dark	test	A	A	testA-A	9	1378.28	543.503	1325	516	23
4	58	A	69.1741	1	1685	1685	139	A-A	dark	test	A	A	testA-A	10	1518.41	239.221	1464	139	10
4	59	A	2.1272	1	2603	2603	323	A-A	dark	test	A	A	testA-A	11	1564.45	788.73	1499	757	32
4	60	A	9.079	1	1808	1808	224	A-A	dark	test	A	A	testA-A	12	292.271	572.53	224	533	6
4	61	A	23.631	1	1312	1312	343	A-A	dark	test	A	A	testA-A	13	1591.47	398.369	1530	343	42
4	62	A	3.5996	1	1753	1753	275	A-A	dark	test	A	A	testA-A	14	1097.02	303.281	1035	275	12
4	63	A	18.4707	1	910	910	430	A-A	dark	test	A	A	testA-A	15	1004.93	444.411	948	430	27
4	64	A	13.481	1	1380	1380	325	A-A	dark	test	A	A	testA-A	16	686.636	798.74	629	755	34
5	1	B	12.1434	1	3311	3311	374	A-A	light	learning	A	A	learning	1	899.8	416.863	834	374	47
5	2	B	26.731	1	2304	2304	348	A-A	light	learning	A	A	learning	2	416.863	765.25	348	708	11
5	3	A	40.9294	1	1952	1952	88	A-A	light	learning	A	A	learning	3	1546.12	159.778	1488	88	53
5	4	A	30.107	1	6114	6114	162	A-A	light	learning	A	A	learning	4	251.079	934.639	162	888	4
5	5	A	24.5369	1	5047	5047	352	A-A	light	learning	A	A	learning	5	1608.59	720.801	1568	679	49
5	6	B	7.3405	1	5970	5970	371	A-A	light	learning	A	A	learning	6	1305.85	743.626	1249	709	12
5	7	A	34.6976	1	5651	5651	142	A-A	light	learning	A	A	learning	7	897.397	207.831	837	142	43
5	8	B	47.9789	1	2921	2921	155	A-A	light	learning	A	A	learning	8	1690.28	234.26	1623	155	41
5	9	A	20.388	1	1116	1116	73	A-A	light	learning	A	A	learning	9	987.497	112.925	906	73	15
5	10	A	40.8046	1	2051	2051	111	A-A	light	learning	A	A	learning	10	1263.8	182.603	1197	111	44
5	11	B	10.8621	1	3356	3356	274	A-A	light	learning	A	A	learning	11	1702.29	574.238	1646	551	19
5	12	B	5.6691	1	5106	5106	364	A-A	light	learning	A	A	learning	12	1624.2	400.045	1556	370	32
5	13	B	18.0817	1	3113	3113	514	A-A	light	learning	A	A	learning	13	1400.76	557.419	1352	514	17
5	14	A	9.3694	1	1041	1041	284	A-A	light	learning	A	A	learning	14	945.451	324.36	882	284	54
5	15	B	38.3789	1	1714	1714	142	A-A	light	learning	A	A	learning	15	215.039	586.251	142	518	31
5	16	A	10.6767	1	1898	1898	505	A-A	light	learning	A	A	learning	16	647.519	610.278	595	575	37
5	17	B	17.0964	1	2523	2523	348	A-A	light	learning	A	A	learning	17	517.775	779.666	451	732	21
5	18	A	33.1393	1	2212	2212	88	A-A	light	learning	A	A	learning	18	860.156	146.563	778	88	42
5	19	A	11.924	1	1240	1240	496	A-A	light	learning	A	A	learning	19	1165.29	521.379	1112	496	25
5	20	B	10.947	1	1860	1860	378	A-A	light	learning	A	A	learning	20	591.057	743.626	531	702	30
5	21	B	16.1962	1	2758	2758	198	A-A	light	learning	A	A	learning	21	392.837	243.871	322	198	38
5	22	A	12.5467	1	1224	1224	423	A-A	light	learning	A	A	learning	22	1230.17	678.754	1175	657	27
5	23	B	18.2235	1	16285	16285	418	A-A	light	learning	A	A	learning	23	492.547	474.527	418	429	51
5	24	A	14.0057	1	2000	2000	290	A-A	light	learning	A	A	learning	24	1327.47	333.971	1270	290	40
5	25	B	4.376	1	1456	1456	536	A-A	light	learning	A	A	learning	25	1311.86	568.231	1245	536	23
5	26	B	25.9755	1	8302	8302	250	A-A	light	learning	A	A	learning	26	1709.5	876.974	1667	830	7
5	27	A	19.8297	1	5194	5194	227	A-A	light	learning	A	A	learning	27	307.542	305.139	227	264	55
5	28	A	22.0763	1	4597	4597	255	A-A	light	learning	A	A	learning	28	336.374	470.923	255	428	28
5	29	B	23.4579	1	6511	6511	382	A-A	light	learning	A	A	learning	29	1579.76	589.855	1538	548	57
5	30	A	22.7655	1	2032	2032	175	A-A	light	learning	A	A	learning	30	550.211	228.254	479	175	20
5	31	A	9.6358	1	990	990	390	A-A	light	learning	A	A	learning	31	1576.15	427.675	1521	390	50
5	32	B	26.1131	1	2379	2379	351	A-A	light	learning	A	A	learning	32	439.688	609.077	351	574	10
5	33	A	7.5965	1	2386	2386	172	A-A	light	search	A	A	searchA	1	228.254	887.786	172	860	14
5	34	A	25.8129	1	3639	3639	147	A-A	light	search	A	A	searchA	2	583.849	987.497	533	933	52
5	35	A	11.8238	1	1524	1524	340	A-A	light	search	A	A	searchA	3	628.298	774.861	577	740	5
5	36	A	24.7699	1	2927	2927	237	A-A	light	search	A	A	searchA	4	1714.3	896.196	1664	843	30
5	37	A	31.2442	1	960	960	426	A-A	light	search	A	A	searchA	5	485.339	615.083	426	553	27
5	38	A	15.9161	1	1191	1191	273	A-A	light	search	A	A	searchA	6	350.79	472.125	273	446	2
5	39	A	18.6869	1	5508	5508	163	A-A	light	search	A	A	searchA	7	1083.6	201.824	1038	163	55
5	40	A	42.8447	1	1242	1242	102	A-A	light	search	A	A	searchA	8	1035.55	160.979	1006	102	39
5	41	A	26.1766	1	1966	1966	424	A-A	light	search	A	A	searchA	9	1081.2	480.534	1010	424	7
5	42	A	16.8113	1	3208	3208	310	A-A	light	search	A	A	searchA	10	1669.86	613.882	1610	566	51
5	43	A	9.3604	1	4716	4716	444	A-A	light	search	A	A	searchA	11	1267.41	676.351	1205	636	26
5	44	A	14.6966	1	2235	2235	173	A-A	light	search	A	A	searchA	12	1523.29	947.853	1472	907	6
5	45	A	27.2845	1	2630	2630	179	A-A	light	search	A	A	searchA	13	1560.53	236.663	1505	179	18
5	46	A	20.5771	1	1553	1553	252	A-A	light	search	A	A	searchA	14	1490.86	303.938	1432	252	16
5	47	A	16.315	1	1342	1342	524	A-A	light	search	A	A	searchA	15	1389.94	556.218	1311	524	31
5	48	A	17.2557	1	2005	2005	481	A-A	light	search	A	A	searchA	16	1173.7	527.386	1103	481	21
5	49	A	20.7693	1	2090	2090	169	A-A	light	test	A	A	testA-A	1	1630.21	217.442	1580	169	4
5	50	A	12.5467	1	2763	2763	139	A-A	light	test	A	A	testA-A	2	1410.37	971.88	1360	941	48
5	51	A	35.7013	1	14171	14171	438	A-A	light	test	A	A	testA-A	3	514.171	688.365	438	623	12
5	52	A	29.5549	1	1947	1947	485	A-A	light	test	A	A	testA-A	4	933.437	652.325	884	595	26
5	53	A	8.1716	1	1967	1967	318	A-A	light	test	A	A	testA-A	5	1654.24	801.29	1591	762	34
5	54	A	24.9717	1	1772	1772	258	A-A	light	test	A	A	testA-A	6	1466.83	314.75	1403	258	8
5	55	A	21.191	1	1094	1094	517	A-A	light	test	A	A	testA-A	7	917.82	568.231	861	517	39
5	56	A	31.9559	1	2250	2250	222	A-A	light	test	A	A	testA-A	8	330.367	920.222	259	858	40
5	57	A	NA	0	timeout	20000	189	A-A	light	test	A	A	testA-A	9	NA	NA	189	620	23
5	58	A	21.5787	1	1263	1263	523	A-A	light	test	A	A	testA-A	10	719.6	610.278	654	557	15
5	59	A	25.1512	1	949	949	496	A-A	light	test	A	A	testA-A	11	1084.81	552.614	1019	496	54
5	60	A	9.3694	1	4438	4438	389	A-A	light	test	A	A	testA-A	12	1225.36	731.613	1162	691	45
5	61	A	11.8238	1	1762	1762	308	A-A	light	test	A	A	testA-A	13	458.91	807.297	407	772	56
5	62	A	18.5392	1	1263	1263	250	A-A	light	test	A	A	testA-A	14	801.29	299.132	744	250	49
5	63	A	9.6327	1	2019	2019	316	A-A	light	test	A	A	testA-A	15	385.628	460.111	316	422	19
5	64	A	15.3209	1	5605	5605	285	A-A	light	test	A	A	testA-A	16	362.803	806.096	285	777	21
6	1	A	11.2947	1	2701	2701	504	A-A	dark	learning	A	A	learning	1	649.601	617.572	583	576	42
6	2	A	25.8066	1	1975	1975	290	A-A	dark	learning	A	A	learning	2	1368.27	845.783	1313	790	51
6	3	B	6.087	1	1566	1566	232	A-A	dark	learning	A	A	learning	3	299.277	424.393	232	388	7
6	4	B	5.2956	1	2460	2460	154	A-A	dark	learning	A	A	learning	4	348.322	960.89	289	926	37
6	5	B	21.6645	1	3025	3025	81	A-A	dark	learning	A	A	learning	5	1174.09	107.099	1132	81	24
6	6	A	27.8525	1	17496	17496	406	A-A	dark	learning	A	A	learning	6	536.497	732.678	469	674	30
6	7	B	26.9708	1	2648	2648	376	A-A	dark	learning	A	A	learning	7	1580.46	544.504	1544	513	52
6	8	A	16.7003	1	6469	6469	471	A-A	dark	learning	A	A	learning	8	628.582	507.47	550	471	3
6	9	B	13.1876	1	5659	5659	75	A-A	dark	learning	A	A	learning	9	1044.97	104.096	995	75	29
6	10	A	10.0816	1	1787	1787	360	A-A	dark	learning	A	A	learning	10	1346.25	751.696	1273	720	21
6	11	A	21.7288	1	1142	1142	504	A-A	dark	learning	A	A	learning	11	820.76	556.515	751	504	44
6	12	B	8.2209	1	1910	1910	174	A-A	dark	learning	A	A	learning	12	1166.08	930.862	1098	906	9
6	13	A	18.355	1	1665	1665	239	A-A	dark	learning	A	A	learning	13	1217.13	888.823	1162	841	57
6	14	A	9.0144	1	1759	1759	319	A-A	dark	learning	A	A	learning	14	1659.54	528.489	1601	489	27
6	15	B	8.7822	1	2935	2935	179	A-A	dark	learning	A	A	learning	15	645.598	207.192	575	179	17
6	16	B	1.8614	1	1552	1552	461	A-A	dark	learning	A	A	learning	16	1331.23	494.458	1267	461	6
6	17	B	18.7973	1	1564	1564	293	A-A	dark	learning	A	A	learning	17	1063.99	343.318	998	293	38
6	18	A	18.1358	1	3428	3428	394	A-A	dark	learning	A	A	learning	18	1305.21	719.666	1260	686	20
6	19	B	21.8166	1	3915	3915	99	A-A	dark	learning	A	A	learning	19	1457.35	139.129	1374	99	22
6	20	A	39.2739	1	1425	1425	125	A-A	dark	learning	A	A	learning	20	1385.28	189.175	1344	125	45
6	21	A	12.8243	1	2215	2215	299	A-A	dark	learning	A	A	learning	21	1231.14	805.746	1157	781	10
6	22	B	13.8834	1	3347	3347	178	A-A	dark	learning	A	A	learning	22	1151.07	946.877	1085	902	26
6	23	B	17.9661	1	1273	1273	465	A-A	dark	learning	A	A	learning	23	1500.39	570.528	1455	538	8
6	24	A	18.0812	1	2437	2437	225	A-A	dark	learning	A	A	learning	24	510.473	885.82	429	855	23
6	25	A	2.4381	1	3016	3016	217	A-A	dark	learning	A	A	learning	25	278.258	264.245	217	234	39
6	26	B	41.6323	1	1075	1075	452	A-A	dark	learning	A	A	learning	26	1159.07	698.647	1109	628	16
6	27	A	4.5986	1	2057	2057	326	A-A	dark	learning	A	A	learning	27	829.768	780.723	766	754	36
6	28	B	5.614	1	1236	1236	511	A-A	dark	learning	A	A	learning	28	1413.31	605.561	1351	569	55
6	29	B	3.4745	1	2098	2098	240	A-A	dark	learning	A	A	learning	29	303.281	312.289	240	284	32
6	30	A	12.2339	1	2201	2201	284	A-A	dark	learning	A	A	learning	30	458.425	838.777	391	796	28
6	31	B	16.6297	1	879	879	504	A-A	dark	learning	A	A	learning	31	1111.03	621.576	1040	576	34
6	32	A	25.5748	1	1604	1604	292	A-A	dark	learning	A	A	learning	32	1585.47	349.323	1521	292	40
6	33	A	16.6985	1	2664	2664	94	A-A	dark	search	A	A	searchA	1	1458.35	137.127	1383	94	31
6	34	A	18.8168	1	1747	1747	378	A-A	dark	search	A	A	searchA	2	1529.42	715.663	1473	702	23
6	35	A	5.3832	1	1063	1063	319	A-A	dark	search	A	A	searchA	3	488.452	354.328	421	319	14
6	36	A	52.1282	1	1019	1019	434	A-A	dark	search	A	A	searchA	4	1438.33	701.65	1421	646	22
6	37	A	45.6128	1	1847	1847	87	A-A	dark	search	A	A	searchA	5	1612.49	164.152	1551	87	36
6	38	A	30.4656	1	1103	1103	516	A-A	dark	search	A	A	searchA	6	1256.16	542.502	1223	516	47
6	39	A	9.5264	1	1127	1127	470	A-A	dark	search	A	A	searchA	7	1129.05	631.585	1067	610	30
6	40	A	6.1735	1	1040	1040	289	A-A	dark	search	A	A	searchA	8	1171.08	324.3	1103	289	15
6	41	A	14.6756	1	915	915	325	A-A	dark	search	A	A	searchA	9	549.509	797.739	477	755	56
6	42	A	19.8842	1	1003	1003	210	A-A	dark	search	A	A	searchA	10	1167.08	250.232	1122	210	52
6	43	A	13.0371	1	808	808	337	A-A	dark	search	A	A	searchA	11	847.785	367.34	798	337	25
6	44	A	14.4572	1	2909	2909	218	A-A	dark	search	A	A	searchA	12	291.27	263.244	223	218	8
6	45	A	21.0831	1	1560	1560	332	A-A	dark	search	A	A	searchA	13	416.385	749.694	332	719	24
6	46	A	23.1991	1	1097	1097	204	A-A	dark	search	A	A	searchA	14	1084	250.232	1003	204	21
6	47	A	7.4225	1	5200	5200	127	A-A	dark	search	A	A	searchA	15	447.414	164.152	389	127	4
6	48	A	12.1662	1	1564	1564	147	A-A	dark	search	A	A	searchA	16	584.541	180.167	509	147	2
6	49	A	6.8875	1	1956	1956	155	A-A	dark	test	A	A	testA-A	1	1534.42	183.17	1477	155	51
6	50	A	22.6777	1	2030	2030	362	A-A	dark	test	A	A	testA-A	2	894.828	415.385	825	362	32
6	51	A	10.3811	1	1776	1776	194	A-A	dark	test	A	A	testA-A	3	1495.38	228.211	1422	194	10
6	52	A	14.5749	1	960	960	212	A-A	dark	test	A	A	testA-A	4	804.745	254.235	732	212	5
6	53	A	51.6135	1	3766	3766	260	A-A	dark	test	A	A	testA-A	5	1696.57	902.836	1636	820	35
6	54	A	30.2326	1	1253	1253	412	A-A	dark	test	A	A	testA-A	6	1521.41	428.397	1484	412	56
6	55	A	22.0838	1	1009	1009	396	A-A	dark	test	A	A	testA-A	7	929.861	427.396	845	396	2
6	56	A	3.0972	1	2523	2523	147	A-A	dark	test	A	A	testA-A	8	886.821	963.893	821	933	15
6	57	A	20.054	1	1120	1120	348	A-A	dark	test	A	A	testA-A	9	1021.95	386.358	978	348	27
6	58	A	16.8253	1	1731	1731	448	A-A	dark	test	A	A	testA-A	10	770.714	679.629	705	632	26
6	59	A	52.4613	1	1497	1497	347	A-A	dark	test	A	A	testA-A	11	1169.08	715.663	1126	733	43
6	60	A	23.6912	1	3513	3513	247	A-A	dark	test	A	A	testA-A	12	1395.29	880.816	1349	833	30
6	61	A	10.6694	1	3180	3180	117	A-A	dark	test	A	A	testA-A	13	637.59	152.141	565	117	19
6	62	A	25.5769	1	6197	6197	98	A-A	dark	test	A	A	testA-A	14	525.487	152.141	450	98	20
6	63	A	5.2727	1	1686	1686	356	A-A	dark	test	A	A	testA-A	15	1346.25	753.698	1278	724	6
6	64	A	29.4364	1	1361	1361	266	A-A	dark	test	A	A	testA-A	16	445.412	318.295	361	266	48
7	1	B	28.0819	1	3963	3963	126	A-A	light	learning	A	A	learning	1	1614.49	160.148	1579	126	40
7	2	A	20.7454	1	1854	1854	432	A-A	light	learning	A	A	learning	2	1283.19	698.647	1227	648	34
7	3	B	5.0907	1	1831	1831	264	A-A	light	learning	A	A	learning	3	655.607	296.274	588	264	16
7	4	A	12.5595	1	1122	1122	489	A-A	light	learning	A	A	learning	4	1121.04	618.573	1046	591	5
7	5	B	19.8409	1	1444	1444	369	A-A	light	learning	A	A	learning	5	960.89	758.702	909	711	38
7	6	B	6.087	1	3925	3925	454	A-A	light	learning	A	A	learning	6	710.658	486.45	642	454	23
7	7	A	43.2762	1	1677	1677	448	A-A	light	learning	A	A	learning	7	874.81	520.482	797	448	30
7	8	A	22.425	1	1225	1225	442	A-A	light	learning	A	A	learning	8	811.752	673.624	771	638	39
7	9	A	4.6303	1	1271	1271	517	A-A	light	learning	A	A	learning	9	1043.97	545.505	978	517	29
7	10	A	8.2962	1	1382	1382	530	A-A	light	learning	A	A	learning	10	1355.25	566.525	1299	530	4
7	11	B	63.2026	1	3719	3719	379	A-A	light	learning	A	A	learning	11	1625.51	577.535	1541	486	45
7	13	A	7.4225	1	1120	1120	152	A-A	light	learning	A	A	learning	13	969.898	189.175	912	152	37
7	14	B	25.2619	1	1516	1516	284	A-A	light	learning	A	A	learning	14	341.316	571.529	284	515	46
7	15	A	7.4225	1	1667	1667	366	A-A	light	learning	A	A	learning	15	1502.39	403.373	1444	366	19
7	16	B	30.4983	1	1132	1132	458	A-A	light	learning	A	A	learning	16	711.659	662.614	678	622	33
7	17	A	22.882	1	1210	1210	130	A-A	light	learning	A	A	learning	17	203.188	201.186	130	149	18
7	18	B	9.9821	1	1372	1372	452	A-A	light	learning	A	A	learning	18	580.538	493.457	520	452	2
7	19	B	18.6398	1	2382	2382	343	A-A	light	learning	A	A	learning	19	423.392	730.677	343	707	42
7	20	A	22.3596	1	2354	2354	281	A-A	light	learning	A	A	learning	20	468.434	316.293	383	281	17
7	21	B	10.9184	1	4185	4185	419	A-A	light	learning	A	A	learning	21	1095.01	681.631	1029	661	8
7	22	A	37.6539	1	5279	5279	450	A-A	light	learning	A	A	learning	22	872.808	694.643	793	630	43
7	23	B	37.0625	1	1501	1501	509	A-A	light	learning	A	A	learning	23	841.779	604.56	816	571	1
7	24	A	25.2323	1	1340	1340	174	A-A	light	learning	A	A	learning	24	376.349	213.197	289	174	22
7	25	A	17.4161	1	2011	2011	134	A-A	light	learning	A	A	learning	25	186.172	387.359	134	342	54
7	26	B	25.919	1	4393	4393	184	A-A	light	learning	A	A	learning	26	1346.25	933.865	1258	896	3
7	27	B	15.4853	1	1662	1662	485	A-A	light	learning	A	A	learning	27	1282.19	501.464	1219	485	21
7	28	A	7.4427	1	6018	6018	135	A-A	light	learning	A	A	learning	28	1591.47	971.9	1534	945	9
7	29	B	27.0587	1	2753	2753	470	A-A	light	learning	A	A	learning	29	1365.26	524.486	1317	470	52
7	30	A	7.7827	1	2811	2811	168	A-A	light	learning	A	A	learning	30	1497.39	950.88	1436	912	24
7	31	A	22.1074	1	1658	1658	336	A-A	light	learning	A	A	learning	31	976.904	370.343	936	336	26
7	32	B	11.2532	1	1544	1544	376	A-A	light	learning	A	A	learning	32	674.625	745.691	616	704	7
7	33	A	26.7296	1	1063	1063	113	A-A	light	search	A	A	searchA	1	259.24	171.159	193	113	45
7	34	A	23.7343	1	1222	1222	297	A-A	light	search	A	A	searchA	2	502.465	352.326	442	297	1
7	35	A	5.0849	1	1448	1448	272	A-A	light	search	A	A	searchA	3	340.315	802.743	272	772	30
7	36	A	29.2815	1	1415	1415	226	A-A	light	search	A	A	searchA	4	646.599	282.261	600	226	38
7	37	A	28.3631	1	1000	1000	270	A-A	light	search	A	A	searchA	5	356.33	429.398	270	414	48
7	38	A	6.0444	1	1563	1563	366	A-A	light	search	A	A	searchA	6	424.393	605.561	366	578	2
7	39	A	10.6811	1	2685	2685	158	A-A	light	search	A	A	searchA	7	1122.04	942.873	1057	922	34
7	40	A	37.9036	1	1250	1250	164	A-A	light	search	A	A	searchA	8	881.817	233.216	814	164	43
7	41	A	27.345	1	3704	3704	405	A-A	light	search	A	A	searchA	9	1540.43	710.658	1504	675	55
7	42	A	17.2523	1	2555	2555	199	A-A	light	search	A	A	searchA	10	279.259	361.335	199	332	44
7	43	A	15.7117	1	2670	2670	419	A-A	light	search	A	A	searchA	11	476.441	640.593	419	595	57
7	44	A	40.5341	1	4498	4498	129	A-A	light	search	A	A	searchA	12	1234.14	961.891	1206	951	14
7	45	A	21.7092	1	1437	1437	309	A-A	light	search	A	A	searchA	13	1049.97	349.323	1007	309	54
7	46	A	17.0824	1	3086	3086	141	A-A	light	search	A	A	searchA	14	552.512	173.16	472	141	11
7	47	A	11.4816	1	4032	4032	219	A-A	light	search	A	A	searchA	15	1568.45	239.221	1505	219	41
7	48	A	24.0972	1	2149	2149	274	A-A	light	search	A	A	searchA	16	891.826	308.285	853	274	53
7	49	A	34.6701	1	2427	2427	485	A-A	light	test	A	A	testA-A	1	1327.23	496.46	1292	485	45
7	50	A	10.7442	1	2139	2139	253	A-A	light	test	A	A	testA-A	2	695.644	294.272	638	253	27
7	51	A	20.6399	1	2213	2213	172	A-A	light	test	A	A	testA-A	3	546.506	959.889	485	908	34
7	52	A	17.7068	1	1490	1490	122	A-A	light	test	A	A	testA-A	4	1403.3	144.133	1355	122	22
7	53	A	15.475	1	1783	1783	287	A-A	light	test	A	A	testA-A	5	359.333	407.377	287	363	30
7	54	A	37.9321	1	2379	2379	162	A-A	light	test	A	A	testA-A	6	948.879	967.896	853	918	54
7	55	A	23.8012	1	1583	1583	114	A-A	light	test	A	A	testA-A	7	652.604	130.12	572	114	24
7	56	A	18.8711	1	3338	3338	180	A-A	light	test	A	A	testA-A	8	1622.5	948.879	1566	900	13
7	57	A	23.0139	1	2073	2073	173	A-A	light	test	A	A	testA-A	9	933.865	939.87	894	907	47
7	58	A	63.7734	1	1425	1425	230	A-A	light	test	A	A	testA-A	10	329.305	400.371	230	316	25
7	59	A	36.2595	1	6420	6420	203	A-A	light	test	A	A	testA-A	11	895.83	876.812	851	877	9
7	60	A	20.5698	1	1942	1942	431	A-A	light	test	A	A	testA-A	12	1373.27	483.448	1311	431	14
7	61	A	46.6022	1	2813	2813	144	A-A	light	test	A	A	testA-A	13	1248.16	930.862	1214	936	7
7	62	A	15.9265	1	942	942	469	A-A	light	test	A	A	testA-A	14	949.88	495.459	902	469	33
7	63	A	34.9228	1	1428	1428	269	A-A	light	test	A	A	testA-A	15	674.625	332.308	627	269	16
7	64	A	35.7249	1	2272	2272	350	A-A	light	test	A	A	testA-A	16	1348.25	734.68	1309	730	51
8	1	A	35.5621	1	1382	1382	501	A-A	dark	learning	A	A	learning	1	1120.04	568.526	1057	501	1
8	2	A	40.6151	1	7322	7322	154	A-A	dark	learning	A	A	learning	2	834.773	973.902	735	926	7
8	3	B	38.2725	1	6326	6326	215	A-A	dark	learning	A	A	learning	3	1655.53	911.844	1628	865	24
8	4	B	13.0812	1	3947	3947	454	A-A	dark	learning	A	A	learning	4	604.56	657.609	528	626	38
8	5	B	8.9152	1	1457	1457	318	A-A	dark	learning	A	A	learning	5	558.517	356.33	489	318	10
8	6	A	28.357	1	4025	4025	126	A-A	dark	learning	A	A	learning	6	1425.32	1011.94	1372	954	35
8	7	B	33.6892	1	3409	3409	80	A-A	dark	learning	A	A	learning	7	235.218	145.134	175	80	51
8	8	A	29.4525	1	1001	1001	138	A-A	dark	learning	A	A	learning	8	559.518	191.177	476	138	16
8	9	A	29.4364	1	5606	5606	129	A-A	dark	learning	A	A	learning	9	417.387	1002.93	333	951	55
8	10	B	23.0092	1	2794	2794	420	A-A	dark	learning	A	A	learning	10	1539.43	473.438	1468	420	9
8	11	B	19.2621	1	1230	1230	210	A-A	dark	learning	A	A	learning	11	1413.31	259.24	1358	210	27
8	12	A	21.8091	1	3853	3853	521	A-A	dark	learning	A	A	learning	12	822.762	607.563	773	559	39
8	13	A	53.0504	1	3109	3109	381	A-A	dark	learning	A	A	learning	13	1343.24	782.725	1273	699	13
8	14	A	15.0797	1	2421	2421	146	A-A	dark	learning	A	A	learning	14	224.208	718.665	146	688	34
8	15	B	37.8853	1	1352	1352	355	A-A	dark	learning	A	A	learning	15	1497.39	418.387	1455	355	47
8	16	B	22.969	1	4045	4045	413	A-A	dark	learning	A	A	learning	16	922.855	698.647	883	667	23
8	17	A	10.7166	1	2109	2109	148	A-A	dark	learning	A	A	learning	17	238.221	973.902	177	932	41
8	18	B	27.2374	1	2108	2108	283	A-A	dark	learning	A	A	learning	18	393.364	854.792	324	797	42
8	19	A	45.2737	1	1003	1003	204	A-A	dark	learning	A	A	learning	19	1463.36	280.26	1408	204	50
8	20	B	27.4248	1	1235	1235	287	A-A	dark	learning	A	A	learning	20	371.344	543.503	287	494	31
8	21	A	14.3805	1	5508	5508	533	A-A	dark	learning	A	A	learning	21	919.852	561.52	871	533	6
8	22	A	4.9686	1	1017	1017	270	A-A	dark	learning	A	A	learning	22	914.847	301.279	857	270	4
8	23	B	13.481	1	3117	3117	154	A-A	dark	learning	A	A	learning	23	456.423	969.898	398	926	30
8	24	B	13.8795	1	3294	3294	382	A-A	dark	learning	A	A	learning	24	1116.03	741.687	1059	698	22
8	25	B	37.2103	1	1078	1078	98	A-A	dark	learning	A	A	learning	25	1268.17	165.153	1216	98	14
8	26	A	14.2973	1	6115	6115	334	A-A	dark	learning	A	A	learning	26	1554.44	779.722	1477	746	11
8	27	A	11.2402	1	2371	2371	341	A-A	dark	learning	A	A	learning	27	919.852	779.722	863	739	54
8	28	B	10.2536	1	3055	3055	277	A-A	dark	learning	A	A	learning	28	1617.5	306.284	1564	277	18
8	29	B	46.4853	1	1088	1088	234	A-A	dark	learning	A	A	learning	29	366.339	300.278	272	234	37
8	30	B	3.9723	1	1588	1588	339	A-A	dark	learning	A	A	learning	30	1647.53	466.432	1581	432	56
8	31	A	20.4105	1	1153	1153	321	A-A	dark	learning	A	A	learning	31	372.345	387.359	321	339	5
8	32	A	17.4357	1	1171	1171	318	A-A	dark	learning	A	A	learning	32	394.365	608.563	318	566	8
8	33	A	19.8464	1	4689	4689	266	A-A	dark	search	A	A	searchA	1	403.373	863.8	333	814	7
8	34	A	25.321	1	1506	1506	505	A-A	dark	search	A	A	searchA	2	593.55	545.505	505	517	3
8	35	A	30.8819	1	3389	3389	450	A-A	dark	search	A	A	searchA	3	1316.22	690.639	1262	630	14
8	36	A	2.5666	1	1872	1872	292	A-A	dark	search	A	A	searchA	4	1692.57	450.417	1628	417	9
8	37	A	16.6723	1	880	880	206	A-A	dark	search	A	A	searchA	5	644.597	254.235	580	206	29
8	38	A	22.1359	1	1103	1103	143	A-A	dark	search	A	A	searchA	6	1220.13	196.182	1152	143	44
8	39	A	24.0852	1	1209	1209	375	A-A	dark	search	A	A	searchA	7	1420.32	426.395	1343	375	51
8	40	A	19.4765	1	1147	1147	318	A-A	dark	search	A	A	searchA	8	1238.15	811.752	1181	762	10
8	41	A	26.6585	1	4663	4663	186	A-A	dark	search	A	A	searchA	9	1118.04	938.869	1078	894	2
8	42	A	36.0754	1	1288	1288	419	A-A	dark	search	A	A	searchA	10	774.717	486.45	706	419	32
8	43	A	32.5183	1	1094	1094	340	A-A	dark	search	A	A	searchA	11	644.597	785.727	553	740	41
8	44	A	27.6316	1	702	702	340	A-A	dark	search	A	A	searchA	12	1126.04	399.37	1061	340	37
8	45	A	32.1218	1	693	693	456	A-A	dark	search	A	A	searchA	13	864.801	514.476	784	456	20
8	46	A	15.4675	1	1606	1606	313	A-A	dark	search	A	A	searchA	14	455.422	794.736	377	767	22
8	47	A	59.9991	1	1399	1399	380	A-A	dark	search	A	A	searchA	15	696.645	730.677	694	700	28
8	48	A	57.4773	1	759	759	335	A-A	dark	search	A	A	searchA	16	798.74	416.385	707	335	21
8	49	A	21.3622	1	1438	1438	459	A-A	dark	test	A	A	testA-A	1	1395.29	648.601	1311	621	15
8	50	A	23.7804	1	1739	1739	182	A-A	dark	test	A	A	testA-A	2	257.238	508.471	182	497	16
8	51	A	5.9658	1	3906	3906	538	A-A	dark	test	A	A	testA-A	3	756.701	568.526	698	542	42
8	52	A	7.478	1	2965	2965	167	A-A	dark	test	A	A	testA-A	4	265.246	203.188	208	167	14
8	53	A	30.4975	1	910	910	427	A-A	dark	test	A	A	testA-A	5	993.92	486.45	918	427	25
8	54	A	22.0153	1	3704	3704	140	A-A	dark	test	A	A	testA-A	6	690.639	972.901	650	940	38
8	55	A	13.1531	1	1176	1176	514	A-A	dark	test	A	A	testA-A	7	964.893	595.551	889	566	19
8	56	A	17.0084	1	1900	1900	232	A-A	dark	test	A	A	testA-A	8	291.27	870.806	232	823	30
8	57	A	21.7009	1	808	808	423	A-A	dark	test	A	A	testA-A	9	535.496	468.434	489	423	43
8	58	A	9.2525	1	4624	4624	80	A-A	dark	test	A	A	testA-A	10	1460.35	116.108	1389	80	31
8	59	A	46.0016	1	1425	1425	160	A-A	dark	test	A	A	testA-A	11	540.5	214.198	437	160	51
8	60	A	25.0685	1	1797	1797	224	A-A	dark	test	A	A	testA-A	12	338.313	280.26	270	224	32
8	61	A	30.8263	1	843	843	423	A-A	dark	test	A	A	testA-A	13	629.583	485.45	563	423	39
8	62	A	35.1116	1	945	945	433	A-A	dark	test	A	A	testA-A	14	777.72	490.454	691	433	22
8	63	A	19.8571	1	2343	2343	216	A-A	dark	test	A	A	testA-A	15	436.404	878.814	362	864	35
8	64	A	23.4498	1	1109	1109	117	A-A	dark	test	A	A	testA-A	16	380.352	168.156	330	117	1
9	1	A	15.0874	1	5491	5491	303	A-A	light	learning	A	A	learning	1	1344.24	815.755	1268	777	44
9	2	B	11.5783	1	1712	1712	309	A-A	light	learning	A	A	learning	2	771.715	352.326	710	309	47
9	3	A	40.475	1	3094	3094	238	A-A	light	learning	A	A	learning	3	1719.59	910.843	1642	842	28
9	4	B	34.5612	1	2694	2694	264	A-A	light	learning	A	A	learning	4	1109.03	881.817	1046	816	2
9	5	A	4.0965	1	2490	2490	161	A-A	light	learning	A	A	learning	5	236.219	193.179	169	161	17
9	6	A	18.8711	1	2368	2368	128	A-A	light	learning	A	A	learning	6	1530.42	1000.93	1474	952	26
9	7	B	12.4825	1	4986	4986	65	A-A	light	learning	A	A	learning	7	1377.28	104.096	1324	65	33
9	8	B	8.2209	1	1334	1334	295	A-A	light	learning	A	A	learning	8	1061.98	320.297	994	295	41
9	9	A	10.2503	1	1325	1325	508	A-A	light	learning	A	A	learning	9	1460.35	610.565	1404	572	36
9	10	B	23.0559	1	2530	2530	413	A-A	light	learning	A	A	learning	10	670.621	709.657	628	667	29
9	11	A	6.7621	1	1382	1382	444	A-A	light	learning	A	A	learning	11	1064.99	660.612	1004	636	27
9	12	B	25.0685	1	1414	1414	386	A-A	light	learning	A	A	learning	12	817.757	749.694	750	694	53
9	13	B	12.4912	1	1142	1142	210	A-A	light	learning	A	A	learning	13	610.565	251.233	539	210	21
9	14	B	11.5783	1	1593	1593	274	A-A	light	learning	A	A	learning	14	929.861	848.786	868	806	10
9	15	A	6.7966	1	1874	1874	219	A-A	light	learning	A	A	learning	15	1369.27	256.237	1310	219	1
9	16	A	10.581	1	19272	19272	265	A-A	light	learning	A	A	learning	16	1716.59	471.437	1655	429	14
9	17	A	9.6001	1	1344	1344	261	A-A	light	learning	A	A	learning	17	1475.37	300.278	1418	261	39
9	18	B	23.7947	1	2272	2272	243	A-A	light	learning	A	A	learning	18	558.517	292.271	479	243	40
9	19	B	27.7242	1	6279	6279	267	A-A	light	learning	A	A	learning	19	1718.59	760.704	1653	702	23
9	20	A	8.3943	1	5108	5108	319	A-A	light	learning	A	A	learning	20	1454.35	796.738	1384	761	30
9	21	A	13.5745	1	1682	1682	142	A-A	light	learning	A	A	learning	21	1046.97	982.91	985	938	12
9	22	A	34.2724	1	4728	4728	63	A-A	light	learning	A	A	learning	22	461.427	98.0908	364	63	4
9	23	B	11.6394	1	3584	3584	369	A-A	light	learning	A	A	learning	23	437.405	524.486	369	503	32
9	24	B	11.6648	1	3657	3657	485	A-A	light	learning	A	A	learning	24	632.586	505.468	568	485	43
9	25	B	15.7618	1	1959	1959	208	A-A	light	learning	A	A	learning	25	547.507	253.234	476	208	8
9	26	A	9.195	1	3782	3782	217	A-A	light	learning	A	A	learning	26	480.445	250.232	408	217	46
9	27	B	4.3206	1	2093	2093	318	A-A	light	learning	A	A	learning	27	454.421	348.322	387	318	24
9	28	A	18.0234	1	3515	3515	131	A-A	light	learning	A	A	learning	28	1504.39	981.909	1459	949	38
9	29	A	23.0291	1	1318	1318	270	A-A	light	learning	A	A	learning	29	1427.32	311.288	1385	270	20
9	30	B	21.7092	1	968	968	376	A-A	light	learning	A	A	learning	30	1555.44	416.385	1512	376	13
9	31	B	31.3635	1	2356	2356	345	A-A	light	learning	A	A	learning	31	684.634	796.738	615	735	48
9	32	A	15.0336	1	1207	1207	334	A-A	light	learning	A	A	learning	32	1375.27	778.721	1327	746	54
9	33	A	14.5731	1	1604	1604	340	A-A	light	search	A	A	searchA	1	599.555	362.336	525	340	35
9	34	A	13.5307	1	2697	2697	529	A-A	light	search	A	A	searchA	2	794.736	593.55	725	551	9
9	35	A	11.2947	1	1226	1226	376	A-A	light	search	A	A	searchA	3	1502.39	745.691	1435	704	44
9	36	A	12.909	1	1999	1999	337	A-A	light	search	A	A	searchA	4	609.564	786.729	544	743	51
9	37	A	7.7564	1	1896	1896	200	A-A	light	search	A	A	searchA	5	498.462	903.837	433	880	27
9	38	A	16.6582	1	2211	2211	294	A-A	light	search	A	A	searchA	6	1268.17	833.772	1207	786	19
9	39	A	17.666	1	2100	2100	371	A-A	light	search	A	A	searchA	7	731.678	757.702	667	709	52
9	40	A	23.3511	1	1333	1333	138	A-A	light	search	A	A	searchA	8	1139.05	192.178	1070	138	30
9	41	A	18.9851	1	1404	1404	157	A-A	light	search	A	A	searchA	9	907.841	962.892	862	923	37
9	42	A	28.2984	1	1370	1370	418	A-A	light	search	A	A	searchA	10	648.601	474.439	572	418	6
9	43	A	8.0801	1	976	976	437	A-A	light	search	A	A	searchA	11	1476.37	461.427	1410	437	57
9	44	A	10.9619	1	2025	2025	173	A-A	light	search	A	A	searchA	12	733.679	196.182	678	173	16
9	45	A	29.6411	1	1567	1567	347	A-A	light	search	A	A	searchA	13	798.74	754.699	708	733	39
9	46	A	27.3128	1	1639	1639	135	A-A	light	search	A	A	searchA	14	225.208	232.215	135	197	48
9	47	A	2.7013	1	1326	1326	480	A-A	light	search	A	A	searchA	15	1294.2	633.587	1232	600	32
9	48	A	18.2293	1	1365	1365	228	A-A	light	search	A	A	searchA	16	1048.97	277.257	991	228	3
9	49	A	16.6723	1	2330	2330	281	A-A	light	test	A	A	testA-A	1	1632.51	846.784	1567	799	32
9	50	A	5.9658	1	1045	1045	179	A-A	light	test	A	A	testA-A	2	993.92	210.195	937	179	27
9	51	A	3.9734	1	4134	4134	144	A-A	light	test	A	A	testA-A	3	342.317	966.895	283	936	36
9	52	A	4.0893	1	1810	1810	384	A-A	light	test	A	A	testA-A	4	1601.48	716.664	1536	682	16
9	53	A	13.8795	1	4167	4167	157	A-A	light	test	A	A	testA-A	5	1469.36	966.895	1412	923	21
9	54	A	4.7557	1	1843	1843	348	A-A	light	test	A	A	testA-A	6	610.565	760.704	544	732	49
9	55	A	3.3185	1	3235	3235	151	A-A	light	test	A	A	testA-A	7	1696.57	961.891	1637	929	26
9	56	A	9.9255	1	1947	1947	213	A-A	light	test	A	A	testA-A	8	281.26	430.399	213	390	25
9	57	A	16.0232	1	2251	2251	401	A-A	light	test	A	A	testA-A	9	1245.15	720.667	1170	679	44
9	58	A	4.6877	1	2240	2240	215	A-A	light	test	A	A	testA-A	10	499.462	898.832	440	865	14
9	59	A	19.0895	1	1487	1487	154	A-A	light	test	A	A	testA-A	11	701.65	194.18	622	154	22
9	60	A	9.624	1	1821	1821	138	A-A	light	test	A	A	testA-A	12	958.888	979.907	889	942	9
9	61	A	11.4605	1	2217	2217	65	A-A	light	test	A	A	testA-A	13	1226.14	91.0843	1153	65	4
9	62	A	2.5322	1	1732	1732	243	A-A	light	test	A	A	testA-A	14	308.285	829.768	243	800	57
9	63	A	12.5854	1	2348	2348	281	A-A	light	test	A	A	testA-A	15	463.429	842.78	399	799	11
9	64	A	9.0306	1	1806	1806	421	A-A	light	test	A	A	testA-A	16	1559.44	672.623	1499	633	40
10	1	B	33.6168	1	2284	2284	217	A-A	dark	learning	A	A	learning	1	1636.52	273.253	1596	217	44
10	2	A	16.7534	1	2735	2735	133	A-A	dark	learning	A	A	learning	2	579.537	967.896	503	947	57
10	3	B	8.1239	1	1807	1807	262	A-A	dark	learning	A	A	learning	3	1609.49	299.277	1552	262	22
10	4	A	11.853	1	1275	1275	528	A-A	dark	learning	A	A	learning	4	1288.19	571.529	1228	552	4
10	5	A	37.7048	1	3488	3488	203	A-A	dark	learning	A	A	learning	5	446.413	269.249	368	203	34
10	6	B	7.4579	1	2626	2626	226	A-A	dark	learning	A	A	learning	6	315.292	879.815	247	854	28
10	7	B	27.1494	1	1927	1927	122	A-A	dark	learning	A	A	learning	7	208.193	139.129	168	122	37
10	8	A	17.4446	1	2662	2662	174	A-A	dark	learning	A	A	learning	8	1474.37	923.855	1400	906	7
10	9	B	17.246	1	1900	1900	302	A-A	dark	learning	A	A	learning	9	506.469	792.734	438	778	24
10	10	B	6.5629	1	2041	2041	431	A-A	dark	learning	A	A	learning	10	557.516	456.423	493	431	16
10	11	A	8.196	1	1726	1726	279	A-A	dark	learning	A	A	learning	11	337.312	610.565	279	573	25
10	12	A	10.9536	1	1385	1385	311	A-A	dark	learning	A	A	learning	12	1494.38	350.324	1439	311	9
10	13	B	13.0371	1	997	997	154	A-A	dark	learning	A	A	learning	13	299.277	184.171	249	154	14
10	14	A	10.5593	1	851	851	340	A-A	dark	learning	A	A	learning	14	737.683	375.348	685	340	47
10	15	B	20.5755	1	2628	2628	362	A-A	dark	learning	A	A	learning	15	426.395	598.554	362	547	32
10	16	A	10.5391	1	1583	1583	233	A-A	dark	learning	A	A	learning	16	936.867	888.823	874	847	5
10	17	B	17.5947	1	1154	1154	193	A-A	dark	learning	A	A	learning	17	1025.95	207.192	965	193	56
10	18	A	17.6527	1	1599	1599	396	A-A	dark	learning	A	A	learning	18	457.423	459.425	396	410	20
10	19	A	11.0582	1	2799	2799	277	A-A	dark	learning	A	A	learning	19	1533.42	835.774	1481	803	42
10	20	B	22.6416	1	1458	1458	184	A-A	dark	learning	A	A	learning	20	1335.24	908.841	1259	896	33
10	21	B	7.5949	1	1527	1527	440	A-A	dark	learning	A	A	learning	21	1540.43	678.628	1478	640	53
10	22	A	36.9549	1	1180	1180	387	A-A	dark	learning	A	A	learning	22	1351.25	738.684	1322	693	13
10	23	B	8.9624	1	812	812	333	A-A	dark	learning	A	A	learning	23	789.731	364.337	736	333	38
10	24	A	5.3568	1	930	930	149	A-A	dark	learning	A	A	learning	24	1244.15	176.163	1184	149	55
10	25	A	6.7572	1	1198	1198	229	A-A	dark	learning	A	A	learning	25	765.709	877.813	698	851	45
10	26	A	15.4807	1	974	974	429	A-A	dark	learning	A	A	learning	26	606.562	464.43	528	429	23
10	27	B	31.0081	1	1121	1121	132	A-A	dark	learning	A	A	learning	27	1287.19	165.153	1255	132	54
10	28	B	22.0677	1	783	783	467	A-A	dark	learning	A	A	learning	28	825.765	650.602	742	613	15
10	29	A	18.2293	1	2181	2181	340	A-A	dark	learning	A	A	learning	29	1142.06	357.331	1068	340	3
10	30	B	17.9947	1	1469	1469	531	A-A	dark	learning	A	A	learning	30	725.672	578.536	654	531	51
10	31	B	28.6486	1	908	908	401	A-A	dark	learning	A	A	learning	31	576.534	458.425	526	401	19
10	32	A	4.7557	1	1595	1595	450	A-A	dark	learning	A	A	learning	32	1316.22	479.444	1249	450	36
10	33	A	14.6298	1	1622	1622	365	A-A	dark	search	A	A	searchA	1	1624.5	385.357	1552	365	22
10	34	A	6.6028	1	2225	2225	299	A-A	dark	search	A	A	searchA	2	1543.43	337.312	1481	299	29
10	35	A	3.632	1	1284	1284	408	A-A	dark	search	A	A	searchA	3	1035.96	699.648	972	672	44
10	36	A	29.3615	1	3962	3962	195	A-A	dark	search	A	A	searchA	4	372.345	902.836	283	885	17
10	37	A	25.8335	1	1557	1557	99	A-A	dark	search	A	A	searchA	5	1068.99	111.103	1023	99	28
10	38	A	35.8298	1	1909	1909	401	A-A	dark	search	A	A	searchA	6	939.87	678.628	860	679	37
10	39	A	7.1147	1	1350	1350	140	A-A	dark	search	A	A	searchA	7	764.708	964.893	705	940	34
10	40	A	19.445	1	1077	1077	254	A-A	dark	search	A	A	searchA	8	1011.94	299.277	963	254	14
10	41	A	9.6001	1	1977	1977	318	A-A	dark	search	A	A	searchA	9	1100.02	800.741	1043	762	38
10	42	A	7.8127	1	1671	1671	330	A-A	dark	search	A	A	searchA	10	1048.97	788.73	984	750	13
10	43	A	15.3608	1	2634	2634	386	A-A	dark	search	A	A	searchA	11	1485.38	432.4	1427	386	36
10	44	A	30.3622	1	942	942	359	A-A	dark	search	A	A	searchA	12	895.83	420.389	840	359	57
10	45	A	7.5047	1	1008	1008	111	A-A	dark	search	A	A	searchA	13	540.5	145.134	470	111	6
10	46	A	1.1594	1	5329	5329	212	A-A	dark	search	A	A	searchA	14	1084	243.225	1020	212	33
10	47	A	15.4091	1	1657	1657	227	A-A	dark	search	A	A	searchA	15	1498.39	265.246	1449	227	20
10	48	A	4.554	1	1423	1423	165	A-A	dark	search	A	A	searchA	16	225.208	556.515	165	528	41
10	49	A	11.962	1	1900	1900	164	A-A	dark	test	A	A	testA-A	1	989.917	946.877	939	916	8
10	50	A	31.5744	1	887	887	337	A-A	dark	test	A	A	testA-A	2	650.602	399.37	596	337	18
10	51	A	17.5774	1	1189	1189	488	A-A	dark	test	A	A	testA-A	3	810.751	640.593	747	592	29
10	52	A	15.9354	1	1202	1202	283	A-A	dark	test	A	A	testA-A	4	334.31	564.523	283	522	7
10	53	A	6.2735	1	1477	1477	212	A-A	dark	test	A	A	testA-A	5	1053.98	238.221	988	212	38
10	54	A	15.9354	1	1110	1110	511	A-A	dark	test	A	A	testA-A	6	579.537	610.565	528	569	12
10	55	A	3.2919	1	2725	2725	212	A-A	dark	test	A	A	testA-A	7	746.691	242.224	687	212	39
10	56	A	8.5612	1	1222	1222	301	A-A	dark	test	A	A	testA-A	8	368.341	680.63	301	642	37
10	57	A	14.0127	1	1900	1900	215	A-A	dark	test	A	A	testA-A	9	270.25	389.361	215	346	14
10	58	A	3.1067	1	2253	2253	463	A-A	dark	test	A	A	testA-A	10	1492.38	648.601	1426	617	6
10	59	A	9.749	1	4837	4837	250	A-A	dark	test	A	A	testA-A	11	1530.42	855.792	1459	830	11
10	60	A	7.3949	1	2798	2798	89	A-A	dark	test	A	A	testA-A	12	627.581	123.114	572	89	31
10	61	A	41.9627	1	1936	1936	143	A-A	dark	test	A	A	testA-A	13	1270.18	190.176	1246	143	33
10	62	A	23.2802	1	1335	1335	320	A-A	dark	test	A	A	testA-A	14	1255.16	370.343	1178	320	49
10	63	A	13.7048	1	1043	1043	470	A-A	dark	test	A	A	testA-A	15	684.634	636.589	635	610	45
10	64	A	6.8181	1	959	959	233	A-A	dark	test	A	A	testA-A	16	378.35	271.251	317	233	44
11	1	A	19.9056	1	1360	1360	312	A-A	light	learning	A	A	learning	1	1551.44	360.334	1477	312	30
11	2	B	29.2964	1	3181	3181	404	A-A	light	learning	A	A	learning	2	1221.13	463.429	1168	404	26
11	3	A	17.6208	1	1994	1994	184	A-A	light	learning	A	A	learning	3	253.234	570.528	184	522	42
11	4	B	34.9872	1	4165	4165	176	A-A	light	learning	A	A	learning	4	762.706	175.162	713	176	54
11	5	A	23.3338	1	1112	1112	306	A-A	light	learning	A	A	learning	5	936.867	359.333	883	306	20
11	6	A	34.7856	1	948	948	436	A-A	light	learning	A	A	learning	6	1543.43	637.59	1484	572	11
11	7	B	11.7223	1	2151	2151	402	A-A	light	learning	A	A	learning	7	467.433	503.466	402	460	12
11	8	B	11.601	1	1033	1033	337	A-A	light	learning	A	A	learning	8	1178.09	365.338	1104	337	49
11	9	B	11.2402	1	816	816	354	A-A	light	learning	A	A	learning	9	1082	395.366	1025	354	41
11	10	A	19.6079	1	1662	1662	410	A-A	light	learning	A	A	learning	10	1561.45	697.646	1510	651	19
11	11	A	19.5176	1	1816	1816	131	A-A	light	learning	A	A	learning	11	263.244	992.919	215	949	46
11	12	B	13.2006	1	1936	1936	329	A-A	light	learning	A	A	learning	12	384.356	693.642	329	652	1
11	13	B	8.6986	1	10125	10125	298	A-A	light	learning	A	A	learning	13	1676.55	463.429	1622	428	3
11	14	B	4.6877	1	1358	1358	117	A-A	light	learning	A	A	learning	14	1088.01	151.14	1029	117	48
11	15	A	4.6877	1	2483	2483	183	A-A	light	learning	A	A	learning	15	1301.2	930.862	1242	897	53
11	16	A	22.3596	1	1315	1315	163	A-A	light	learning	A	A	learning	16	242.224	432.4	163	385	8
11	17	B	24.0127	1	3005	3005	316	A-A	light	learning	A	A	learning	17	1643.52	420.389	1604	387	36
11	18	A	4.6743	1	1845	1845	195	A-A	light	learning	A	A	learning	18	1296.2	919.852	1230	885	5
11	19	A	1.8614	1	872	872	468	A-A	light	learning	A	A	learning	19	1058.98	501.464	995	468	14
11	20	B	11.7533	1	1318	1318	262	A-A	light	learning	A	A	learning	20	1319.22	284.263	1263	262	52
11	21	A	56.4019	1	1541	1541	384	A-A	light	learning	A	A	learning	21	1574.46	503.466	1536	421	23
11	22	B	4.0893	1	1283	1283	447	A-A	light	learning	A	A	learning	22	754.699	482.447	690	447	9
11	23	A	14.614	1	5497	5497	487	A-A	light	learning	A	A	learning	23	1254.16	609.564	1193	593	51
11	24	B	23.3338	1	1357	1357	499	A-A	light	learning	A	A	learning	24	1475.37	568.526	1421	515	7
11	25	A	39.3965	1	2241	2241	408	A-A	light	learning	A	A	learning	25	1537.42	596.552	1512	576	32
11	26	B	29.299	1	3950	3950	208	A-A	light	learning	A	A	learning	26	300.278	320.297	208	285	56
11	27	B	24.2133	1	2972	2972	136	A-A	light	learning	A	A	learning	27	654.606	170.158	568	136	33
11	28	A	16.8889	1	1252	1252	281	A-A	light	learning	A	A	learning	28	1389.29	835.774	1342	799	57
11	29	A	45.9401	1	1291	1291	384	A-A	light	learning	A	A	learning	29	422.391	687.637	384	618	43
11	30	B	18.0692	1	1531	1531	290	A-A	light	learning	A	A	learning	30	1676.55	557.516	1630	534	22
11	31	A	14.8374	1	1383	1383	185	A-A	light	learning	A	A	learning	31	1370.27	230.213	1301	185	15
11	32	B	14.7842	1	1341	1341	201	A-A	light	learning	A	A	learning	32	270.25	740.686	201	723	2
11	33	A	15.0797	1	923	923	202	A-A	light	search	A	A	searchA	1	1079	908.841	1001	878	46
11	34	A	18.0297	1	1003	1003	345	A-A	light	search	A	A	searchA	2	1607.49	389.361	1557	345	34
11	35	A	3.656	1	1661	1661	101	A-A	light	search	A	A	searchA	3	1659.54	136.126	1597	101	33
11	36	A	21.1848	1	1961	1961	172	A-A	light	search	A	A	searchA	4	648.601	951.881	569	908	3
11	37	A	14.8613	1	2337	2337	294	A-A	light	search	A	A	searchA	5	360.334	493.457	294	447	1
11	38	A	24.4985	1	836	836	334	A-A	light	search	A	A	searchA	6	1366.27	374.347	1326	334	28
11	39	A	18.7617	1	1194	1194	514	A-A	light	search	A	A	searchA	7	1281.19	609.564	1232	566	52
11	40	A	18.6349	1	987	987	223	A-A	light	search	A	A	searchA	8	1185.1	259.24	1104	223	26
11	41	A	8.0366	1	1685	1685	164	A-A	light	search	A	A	searchA	9	579.537	939.87	519	916	22
11	42	A	27.2897	1	849	849	255	A-A	light	search	A	A	searchA	10	1040.96	307.284	996	255	56
11	43	A	15.8421	1	998	998	536	A-A	light	search	A	A	searchA	11	1118.04	583.54	1052	536	38
11	44	A	21.7493	1	3147	3147	229	A-A	light	search	A	A	searchA	12	527.488	282.261	467	229	2
11	45	A	19.8842	1	1990	1990	186	A-A	light	search	A	A	searchA	13	1279.18	905.839	1220	894	9
11	46	A	21.2232	1	899	899	334	A-A	light	search	A	A	searchA	14	1068.99	375.348	1025	334	11
11	47	A	29.0207	1	1202	1202	194	A-A	light	search	A	A	searchA	15	952.882	249.231	907	194	27
11	48	A	18.0095	1	1477	1477	462	A-A	light	search	A	A	searchA	16	911.844	511.474	845	462	40
11	49	A	35.6152	1	2751	2751	418	A-A	light	test	A	A	testA-A	1	1327.23	728.675	1266	662	23
11	50	A	22.2758	1	1245	1245	229	A-A	light	test	A	A	testA-A	2	276.256	773.716	229	727	54
11	51	A	3.1067	1	2542	2542	270	A-A	light	test	A	A	testA-A	3	967.896	841.779	902	810	9
11	52	A	14.4944	1	910	910	493	A-A	light	test	A	A	testA-A	4	1480.37	536.497	1427	494	47
11	53	A	9.224	1	1447	1447	240	A-A	light	test	A	A	testA-A	5	694.643	866.803	624	840	35
11	54	A	21.1848	1	1981	1981	224	A-A	light	test	A	A	testA-A	6	644.597	899.833	565	856	49
11	55	A	20.1923	1	1404	1404	380	A-A	light	test	A	A	testA-A	7	477.442	750.695	409	700	41
11	56	A	17.3221	1	3508	3508	224	A-A	light	test	A	A	testA-A	8	357.331	895.83	279	856	13
11	57	A	6.087	1	901	901	482	A-A	light	test	A	A	testA-A	9	1192.1	629.583	1123	598	46
11	58	A	25.4145	1	1408	1408	388	A-A	light	test	A	A	testA-A	10	436.404	717.664	388	666	10
11	59	A	4.6743	1	2040	2040	163	A-A	light	test	A	A	testA-A	11	582.539	951.881	516	917	38
11	60	A	18.5703	1	1250	1250	329	A-A	light	test	A	A	testA-A	12	391.362	535.496	329	485	3
11	61	A	6.087	1	872	872	259	A-A	light	test	A	A	testA-A	13	1343.24	295.273	1276	259	43
11	62	A	31.1	1	2745	2745	421	A-A	light	test	A	A	testA-A	14	1450.34	708.656	1412	659	53
11	63	A	17.2523	1	932	932	386	A-A	light	test	A	A	testA-A	15	562.521	722.669	482	694	31
11	64	A	13.5242	1	2326	2326	165	A-A	light	test	A	A	testA-A	16	233.216	238.221	165	194	2
12	1	B	37.6992	1	3597	3597	433	A-A	dark	learning	A	A	learning	1	518.48	697.646	433	636	42
12	2	B	47.5149	1	1795	1795	269	A-A	dark	learning	A	A	learning	2	1675.55	782.725	1651	723	18
12	3	A	17.666	1	1983	1983	344	A-A	dark	learning	A	A	learning	3	409.379	761.705	344	713	34
12	4	A	21.3276	1	1842	1842	393	A-A	dark	learning	A	A	learning	4	475.44	594.551	393	554	40
12	5	A	28.3982	1	4407	4407	289	A-A	dark	learning	A	A	learning	5	713.661	848.786	641	791	19
12	6	B	25.6079	1	3989	3989	161	A-A	dark	learning	A	A	learning	6	667.618	207.192	584	161	14
12	7	A	16.6497	1	1211	1211	176	A-A	dark	learning	A	A	learning	7	228.211	286.265	176	242	4
12	8	B	21.3354	1	8084	8084	439	A-A	dark	learning	A	A	learning	8	1284.19	679.629	1241	641	1
12	9	A	26.8452	1	1541	1541	517	A-A	dark	learning	A	A	learning	9	714.662	575.533	656	517	37
12	10	A	20.9459	1	2112	2112	158	A-A	dark	learning	A	A	learning	10	1591.47	973.902	1524	922	13
12	11	B	14.7901	1	1348	1348	351	A-A	dark	learning	A	A	learning	11	991.918	396.367	935	351	5
12	12	B	12.7089	1	1522	1522	476	A-A	dark	learning	A	A	learning	12	579.537	647.6	514	604	8
12	13	B	24.8857	1	1769	1769	539	A-A	dark	learning	A	A	learning	13	682.632	595.551	616	539	45
12	14	B	2.5322	1	2975	2975	135	A-A	dark	learning	A	A	learning	14	198.184	583.54	135	550	24
12	15	A	10.592	1	1694	1694	417	A-A	dark	learning	A	A	learning	15	566.525	459.425	502	417	3
12	16	A	7.6102	1	3144	3144	373	A-A	dark	learning	A	A	learning	16	973.902	745.691	910	707	52
12	17	A	24.2789	1	2657	2657	88	A-A	dark	learning	A	A	learning	17	1638.52	127.118	1552	88	23
12	18	B	20.1781	1	1097	1097	225	A-A	dark	learning	A	A	learning	18	1024.95	275.255	970	225	49
12	19	B	9.2854	1	993	993	211	A-A	dark	learning	A	A	learning	19	910.843	240.222	857	211	16
12	20	A	8.7254	1	870	870	504	A-A	dark	learning	A	A	learning	20	818.758	527.488	754	504	56
12	21	A	20.7926	1	3589	3589	225	A-A	dark	learning	A	A	learning	21	1605.49	265.246	1561	225	2
12	22	B	20.1754	1	1823	1823	364	A-A	dark	learning	A	A	learning	22	845.783	760.704	798	716	17
12	23	A	19.0833	1	1337	1337	493	A-A	dark	learning	A	A	learning	23	1018.94	618.573	937	587	53
12	24	B	12.9844	1	9725	9725	484	A-A	dark	learning	A	A	learning	24	1115.03	615.57	1046	596	38
12	25	B	24.5421	1	6564	6564	246	A-A	dark	learning	A	A	learning	25	620.575	883.818	542	834	7
12	26	B	22.0677	1	1605	1605	246	A-A	dark	learning	A	A	learning	26	1028.95	284.263	945	246	51
12	27	A	16.321	1	1556	1556	133	A-A	dark	learning	A	A	learning	27	202.187	984.912	154	947	26
12	28	A	17.0084	1	1264	1264	285	A-A	dark	learning	A	A	learning	28	344.319	679.629	285	632	50
12	29	A	24.2903	1	1822	1822	217	A-A	dark	learning	A	A	learning	29	1232.14	917.85	1175	863	39
12	30	B	34.7856	1	3322	3322	487	A-A	dark	learning	A	A	learning	30	617.572	658.61	559	593	11
12	31	B	NA	0	timeout	20000	139	A-A	dark	learning	A	A	learning	31	NA	NA	1174	941	57
12	32	A	15.3608	1	1100	1100	432	A-A	dark	learning	A	A	learning	32	889.824	478.443	832	432	6
12	33	A	33.6443	1	1179	1179	66	A-A	dark	search	A	A	searchA	1	422.391	127.118	343	66	42
12	34	A	23.7357	1	2911	2911	153	A-A	dark	search	A	A	searchA	2	206.191	367.34	153	314	18
12	35	A	22.6416	1	2518	2518	332	A-A	dark	search	A	A	searchA	3	991.918	800.741	936	748	3
12	36	A	24.3191	1	1614	1614	252	A-A	dark	search	A	A	searchA	4	1736.61	669.62	1668	615	31
12	37	A	32.5765	1	1845	1845	380	A-A	dark	search	A	A	searchA	5	1073.99	763.707	1010	700	27
12	38	A	27.575	1	2540	2540	482	A-A	dark	search	A	A	searchA	6	566.525	656.608	502	598	29
12	39	A	18.9033	1	3753	3753	345	A-A	dark	search	A	A	searchA	7	1032.96	771.715	952	735	55
12	40	A	34.7856	1	2234	2234	236	A-A	dark	search	A	A	searchA	8	599.555	302.28	541	236	28
12	41	A	38.7231	1	1055	1055	359	A-A	dark	search	A	A	searchA	9	1060.98	784.727	1019	721	48
12	42	A	21.7009	1	1994	1994	380	A-A	dark	search	A	A	searchA	10	839.778	425.394	794	380	23
12	43	A	30.9028	1	8572	8572	423	A-A	dark	search	A	A	searchA	11	506.469	628.582	423	621	19
12	44	A	16.1679	1	5465	5465	289	A-A	dark	search	A	A	searchA	12	1230.14	836.775	1160	791	10
12	45	A	10.6811	1	1507	1507	400	A-A	dark	search	A	A	searchA	13	465.431	583.54	400	563	9
12	46	A	5.5564	1	746	746	369	A-A	dark	search	A	A	searchA	14	431.399	473.438	369	447	45
12	47	A	17.1453	1	3492	3492	278	A-A	dark	search	A	A	searchA	15	920.853	312.289	875	278	53
12	48	A	29.0891	1	3432	3432	227	A-A	dark	search	A	A	searchA	16	1505.39	258.239	1413	227	14
12	49	A	4.9796	1	1052	1052	338	A-A	dark	test	A	A	testA-A	1	1426.32	374.347	1361	338	47
12	50	A	9.4135	1	2068	2068	335	A-A	dark	test	A	A	testA-A	2	1124.04	778.721	1052	745	16
12	51	A	38.063	1	2244	2244	82	A-A	dark	test	A	A	testA-A	3	556.515	147.136	511	82	5
12	52	A	15.0683	1	1891	1891	148	A-A	dark	test	A	A	testA-A	4	721.668	194.18	663	148	30
12	53	A	11.7024	1	1103	1103	143	A-A	dark	test	A	A	testA-A	5	204.189	223.207	143	180	53
12	54	A	16.6497	1	1844	1844	346	A-A	dark	test	A	A	testA-A	6	1319.22	390.361	1267	346	43
12	55	A	21.6911	1	5881	5881	305	A-A	dark	test	A	A	testA-A	7	1671.55	744.689	1615	693	7
12	56	A	39.58	1	1568	1568	514	A-A	dark	test	A	A	testA-A	8	1391.29	585.542	1327	514	13
12	57	A	13.1823	1	1236	1236	453	A-A	dark	test	A	A	testA-A	9	1276.18	670.621	1209	627	11
12	58	A	18.1358	1	2184	2184	265	A-A	dark	test	A	A	testA-A	10	1346.25	848.786	1301	815	29
12	59	A	39.8573	1	917	917	436	A-A	dark	test	A	A	testA-A	11	744.689	713.661	672	644	27
12	60	A	27.0749	1	2403	2403	95	A-A	dark	test	A	A	testA-A	12	488.452	104.096	410	95	37
12	61	A	13.1467	1	1839	1839	164	A-A	dark	test	A	A	testA-A	13	1358.26	208.193	1299	164	55
12	62	A	34.0831	1	1752	1752	527	A-A	dark	test	A	A	testA-A	14	966.895	617.572	910	553	51
12	63	A	10.2536	1	1577	1577	88	A-A	dark	test	A	A	testA-A	15	806.747	117.108	754	88	54
12	64	A	23.3788	1	1120	1120	473	A-A	dark	test	A	A	testA-A	16	972.901	659.611	901	607	48
13	1	B	18.1731	1	2089	2089	332	A-A	light	learning	A	A	learning	1	1634.51	674.625	1588	637	28
13	2	A	15.2202	1	2327	2327	258	A-A	light	learning	A	A	learning	2	1717.59	516.478	1662	471	36
13	3	A	41.5312	1	5529	5529	238	A-A	light	learning	A	A	learning	3	337.312	838.777	238	787	29
13	4	B	27.6245	1	1894	1894	275	A-A	light	learning	A	A	learning	4	1193.1	858.795	1146	805	16
13	5	A	6.087	1	1603	1603	466	A-A	light	learning	A	A	learning	5	1505.39	649.601	1438	614	52
13	6	B	12.8928	1	1369	1369	329	A-A	light	learning	A	A	learning	6	404.374	443.411	329	407	7
13	7	B	9.0306	1	2084	2084	246	A-A	light	learning	A	A	learning	7	1474.37	286.265	1414	246	21
13	8	A	18.986	1	1987	1987	314	A-A	light	learning	A	A	learning	8	396.367	364.337	329	314	31
13	9	A	12.7535	1	3284	3284	210	A-A	light	learning	A	A	learning	9	262.243	278.258	210	240	43
13	10	A	15.5214	1	3337	3337	137	A-A	light	learning	A	A	learning	10	652.604	153.142	589	137	24
13	11	B	20.7848	1	3831	3831	502	A-A	light	learning	A	A	learning	11	1109.03	553.513	1039	502	42
13	12	B	8.4537	1	1595	1595	305	A-A	light	learning	A	A	learning	12	1054.98	339.314	984	305	44
13	13	B	9.0693	1	3332	3332	358	A-A	light	learning	A	A	learning	13	1340.24	398.369	1274	358	35
13	14	A	21.0514	1	3634	3634	295	A-A	light	learning	A	A	learning	14	1220.13	797.739	1147	785	40
13	15	A	13.1823	1	1723	1723	298	A-A	light	learning	A	A	learning	15	547.507	342.317	480	298	55
13	16	B	14.0793	1	2560	2560	311	A-A	light	learning	A	A	learning	16	1346.25	354.328	1275	311	30
13	17	A	7.6948	1	1744	1744	443	A-A	light	learning	A	A	learning	17	510.473	514.476	443	476	8
13	18	B	17.8105	1	7265	7265	98	A-A	light	learning	A	A	learning	18	760.704	147.136	695	98	48
13	19	A	21.1351	1	7225	7225	145	A-A	light	learning	A	A	learning	19	881.817	197.183	824	145	3
13	20	B	13.2006	1	3725	3725	285	A-A	light	learning	A	A	learning	20	681.631	836.775	627	795	33
13	21	A	14.1938	1	2066	2066	328	A-A	light	learning	A	A	learning	21	1622.5	365.338	1546	328	10
13	22	B	21.6366	1	3076	3076	142	A-A	light	learning	A	A	learning	22	1292.2	159.147	1213	142	23
13	23	B	16.4444	1	4617	4617	262	A-A	light	learning	A	A	learning	23	1736.61	783.726	1658	756	57
13	24	A	21.2224	1	2057	2057	307	A-A	light	learning	A	A	learning	24	1697.57	618.573	1613	590	1
13	25	A	15.0874	1	5667	5667	357	A-A	light	learning	A	A	learning	25	550.51	761.705	474	723	12
13	26	A	8.5064	1	2418	2418	505	A-A	light	learning	A	A	learning	26	1139.05	544.504	1080	505	2
13	27	B	24.6989	1	2721	2721	216	A-A	light	learning	A	A	learning	27	291.27	585.542	216	532	4
13	28	B	37.5033	1	1582	1582	331	A-A	light	learning	A	A	learning	28	1689.56	650.602	1589	614	50
13	29	B	14.6719	1	12652	12652	174	A-A	light	learning	A	A	learning	29	1616.5	220.204	1555	174	9
13	30	A	13.8581	1	1439	1439	332	A-A	light	learning	A	A	learning	30	1106.02	377.349	1046	332	47
13	31	A	9.624	1	1292	1292	316	A-A	light	learning	A	A	learning	31	1021.95	354.328	952	316	20
13	32	B	13.5242	1	2228	2228	357	A-A	light	learning	A	A	learning	32	459.425	766.71	391	723	11
13	33	A	21.5492	1	1471	1471	65	A-A	light	search	A	A	searchA	1	1018.94	118.109	956	65	42
13	34	A	39.94	1	2078	2078	321	A-A	light	search	A	A	searchA	2	400.371	636.589	321	569	37
13	35	A	22.7569	1	1438	1438	444	A-A	light	search	A	A	searchA	3	1339.24	689.639	1273	636	1
13	36	A	27.2068	1	1813	1813	254	A-A	light	search	A	A	searchA	4	1593.48	838.777	1550	826	11
13	37	A	28.8215	1	5011	5011	155	A-A	light	search	A	A	searchA	5	307.284	180.167	216	155	41
13	38	A	14.9107	1	2276	2276	295	A-A	light	search	A	A	searchA	6	513.475	828.767	442	785	53
13	39	A	1.8137	1	1700	1700	93	A-A	light	search	A	A	searchA	7	1374.27	123.114	1310	93	25
13	40	A	21.6474	1	5485	5485	207	A-A	light	search	A	A	searchA	8	272.252	775.718	207	723	28
13	41	A	14.7836	1	1246	1246	278	A-A	light	search	A	A	searchA	9	874.81	318.295	800	278	33
13	42	A	18.4059	1	983	983	235	A-A	light	search	A	A	searchA	10	1144.06	283.262	1073	235	4
13	43	A	25.2135	1	984	984	185	A-A	light	search	A	A	searchA	11	1184.1	220.204	1146	185	5
13	44	A	8.2962	1	986	986	421	A-A	light	search	A	A	searchA	12	732.678	457.423	677	421	44
13	45	A	23.3295	1	2117	2117	298	A-A	light	search	A	A	searchA	13	428.397	337.312	343	298	40
13	46	A	37.179	1	7739	7739	330	A-A	light	search	A	A	searchA	14	1690.57	653.605	1590	620	49
13	47	A	15.3142	1	3212	3212	202	A-A	light	search	A	A	searchA	15	275.255	721.668	202	679	12
13	48	A	21.6757	1	1120	1120	296	A-A	light	search	A	A	searchA	16	669.62	342.317	591	296	19
13	49	A	17.1375	1	839	839	372	A-A	light	test	A	A	testA-A	1	960.89	418.387	889	372	10
13	50	A	14.9107	1	2147	2147	177	A-A	light	test	A	A	testA-A	2	1146.06	221.205	1075	177	29
13	51	A	10.2536	1	1286	1286	206	A-A	light	test	A	A	testA-A	3	1599.48	235.218	1546	206	24
13	52	A	5.4701	1	1286	1286	456	A-A	light	test	A	A	testA-A	4	811.752	659.611	746	624	19
13	53	A	17.3019	1	1539	1539	246	A-A	light	test	A	A	testA-A	5	1246.15	294.272	1178	246	34
13	54	A	33.1145	1	1082	1082	178	A-A	light	test	A	A	testA-A	6	611.566	227.21	520	178	26
13	55	A	3.6879	1	1504	1504	175	A-A	light	test	A	A	testA-A	7	1181.09	939.87	1117	905	55
13	56	A	12.159	1	1012	1012	296	A-A	light	test	A	A	testA-A	8	1570.45	338.313	1501	296	42
13	57	A	15.5721	1	1347	1347	89	A-A	light	test	A	A	testA-A	9	1104.02	136.126	1042	89	14
13	58	A	26.0271	1	1270	1270	526	A-A	light	test	A	A	testA-A	10	724.671	583.54	667	526	11
13	59	A	27.5897	1	1408	1408	122	A-A	light	test	A	A	testA-A	11	952.882	170.158	868	122	31
13	60	A	23.9685	1	5022	5022	146	A-A	light	test	A	A	testA-A	12	927.859	964.893	889	934	3
13	61	A	32.2756	1	1624	1624	263	A-A	light	test	A	A	testA-A	13	1622.5	291.27	1527	263	6
13	62	A	3.1915	1	1406	1406	325	A-A	light	test	A	A	testA-A	14	1656.53	675.626	1595	642	32
13	63	A	11.0812	1	1398	1398	387	A-A	light	test	A	A	testA-A	15	457.423	578.536	387	538	57
13	64	A	14.5731	1	1260	1260	481	A-A	light	test	A	A	testA-A	16	844.782	620.575	771	599	56
14	2	B	19.4937	1	1676	1676	84	A-A	dark	learning	A	A	learning	2	1552.44	120.111	1508	84	42
14	3	A	63.0143	1	1727	1727	238	A-A	dark	learning	A	A	learning	3	356.33	881.817	238	820	12
14	5	B	29.5963	1	2160	2160	286	A-A	dark	learning	A	A	learning	5	378.35	453.42	286	427	24
14	6	A	18.0828	1	1607	1607	537	A-A	dark	learning	A	A	learning	6	642.595	569.527	562	537	23
14	7	A	33.2111	1	942	942	244	A-A	dark	learning	A	A	learning	7	1013.94	304.282	968	244	9
14	8	B	33.6443	1	3731	3731	336	A-A	dark	learning	A	A	learning	8	1513.4	397.368	1434	336	18
14	9	B	24.5878	1	989	989	178	A-A	dark	learning	A	A	learning	9	648.601	233.216	579	178	21
14	10	A	4.4754	1	1538	1538	87	A-A	dark	learning	A	A	learning	10	334.31	114.106	271	87	51
14	11	A	9.0822	1	1900	1900	171	A-A	dark	learning	A	A	learning	11	899.833	940.871	828	909	2
14	12	B	21.1292	1	817	817	267	A-A	dark	learning	A	A	learning	12	736.682	297.275	653	267	44
14	13	A	11.0786	1	987	987	188	A-A	dark	learning	A	A	learning	13	654.606	219.203	581	188	49
14	14	B	25.522	1	1022	1022	233	A-A	dark	learning	A	A	learning	14	1294.2	287.266	1243	233	29
14	15	B	2.6466	1	2791	2791	193	A-A	dark	learning	A	A	learning	15	1302.21	222.206	1240	193	28
14	16	A	20.7926	1	2139	2139	353	A-A	dark	learning	A	A	learning	16	1552.44	766.71	1508	727	7
14	17	A	27.2465	1	1499	1499	260	A-A	dark	learning	A	A	learning	17	1576.46	869.805	1533	820	50
14	18	B	14.6878	1	1385	1385	166	A-A	dark	learning	A	A	learning	18	1464.36	212.196	1399	166	57
14	19	B	31.5623	1	1626	1626	369	A-A	dark	learning	A	A	learning	19	644.597	718.665	561	711	43
14	20	A	45.096	1	1416	1416	433	A-A	dark	learning	A	A	learning	20	1521.41	550.51	1487	484	54
14	21	A	24.4985	1	3759	3759	424	A-A	dark	learning	A	A	learning	21	542.502	695.644	502	656	45
14	22	B	36.9125	1	1581	1581	465	A-A	dark	learning	A	A	learning	22	505.468	667.618	472	615	55
14	23	A	19.0634	1	1700	1700	459	A-A	dark	learning	A	A	learning	23	1541.43	639.592	1461	617	46
14	24	B	32.2234	1	851	851	281	A-A	dark	learning	A	A	learning	24	754.699	324.3	662	281	11
14	25	B	17.3633	1	1379	1379	411	A-A	dark	learning	A	A	learning	25	1415.31	430.399	1340	411	37
14	26	A	28.9733	1	1033	1033	500	A-A	dark	learning	A	A	learning	26	1025.95	532.493	992	500	10
14	27	A	20.1644	1	1102	1102	517	A-A	dark	learning	A	A	learning	27	1064.99	555.514	983	517	35
14	28	B	29.9604	1	1165	1165	180	A-A	dark	learning	A	A	learning	28	279.259	240.222	207	180	13
14	29	A	24.742	1	1603	1603	166	A-A	dark	learning	A	A	learning	29	1452.34	969.898	1386	914	4
14	30	A	17.2934	1	2884	2884	345	A-A	dark	learning	A	A	learning	30	423.392	578.536	345	556	1
14	31	B	13.5745	1	1551	1551	423	A-A	dark	learning	A	A	learning	31	1192.1	701.65	1130	657	15
14	32	B	17.5809	1	2745	2745	267	A-A	dark	learning	A	A	learning	32	701.65	860.797	645	813	36
14	33	A	32.3142	1	954	954	109	A-A	dark	search	A	A	searchA	1	1266.17	172.159	1210	109	32
14	34	A	63.7801	1	1314	1314	372	A-A	dark	search	A	A	searchA	2	1364.26	802.743	1306	708	40
14	35	A	12.6878	1	1728	1728	460	A-A	dark	search	A	A	searchA	3	1229.14	661.613	1159	620	3
14	36	A	42.7031	1	1442	1442	308	A-A	dark	search	A	A	searchA	4	1222.13	837.776	1134	772	55
14	37	A	7.478	1	2374	2374	302	A-A	dark	search	A	A	searchA	5	365.338	597.553	302	574	23
14	38	A	51.0092	1	772	772	489	A-A	dark	search	A	A	searchA	6	1002.93	470.436	933	489	48
14	39	A	15.7117	1	932	932	447	A-A	dark	search	A	A	searchA	7	1049.97	678.628	993	633	30
14	40	A	11.2406	1	7144	7144	325	A-A	dark	search	A	A	searchA	8	1647.53	443.411	1595	409	8
14	42	A	7.2166	1	2535	2535	390	A-A	dark	search	A	A	searchA	10	1478.37	428.397	1412	390	46
14	43	A	44.3848	1	781	781	202	A-A	dark	search	A	A	searchA	11	825.765	258.239	800	202	50
14	44	A	66.804	1	3523	3523	279	A-A	dark	search	A	A	searchA	12	625.579	320.297	496	279	17
14	45	A	28.8623	1	1977	1977	311	A-A	dark	search	A	A	searchA	13	1647.53	462.428	1609	445	33
14	46	A	17.0084	1	1397	1397	448	A-A	dark	search	A	A	searchA	14	507.47	562.521	448	514	4
14	47	A	6.087	1	1583	1583	330	A-A	dark	search	A	A	searchA	15	775.718	781.724	707	750	26
14	48	A	7.7262	1	4463	4463	275	A-A	dark	search	A	A	searchA	16	1705.58	512.475	1645	488	44
14	49	A	28.1094	1	2057	2057	222	A-A	dark	test	A	A	testA-A	1	445.412	878.814	356	858	46
14	50	A	18.1137	1	814	814	242	A-A	dark	test	A	A	testA-A	2	979.907	286.265	904	242	11
14	51	A	6.0437	1	1012	1012	368	A-A	dark	test	A	A	testA-A	3	435.403	447.414	368	420	43
14	52	A	17.666	1	698	698	317	A-A	dark	test	A	A	testA-A	4	534.495	366.339	469	317	34
14	53	A	31.4906	1	911	911	387	A-A	dark	test	A	A	testA-A	5	1040.96	440.408	1001	387	25
14	54	A	22.9732	1	904	904	159	A-A	dark	test	A	A	testA-A	6	1232.14	210.195	1157	159	12
14	55	A	56.9773	1	1863	1863	353	A-A	dark	test	A	A	testA-A	7	1658.54	714.662	1567	634	7
14	56	A	36.6146	1	724	724	374	A-A	dark	test	A	A	testA-A	8	969.898	442.41	909	374	36
14	57	A	10.0064	1	4657	4657	87	A-A	dark	test	A	A	testA-A	9	239.221	114.106	185	87	3
14	58	A	24.4643	1	2023	2023	480	A-A	dark	test	A	A	testA-A	10	568.526	614.569	487	600	9
14	59	A	30.1383	1	962	962	463	A-A	dark	test	A	A	testA-A	11	542.502	523.485	463	517	50
14	60	A	10.2678	1	3053	3053	230	A-A	dark	test	A	A	testA-A	12	293.272	871.807	234	850	29
14	61	A	3.6879	1	1678	1678	96	A-A	dark	test	A	A	testA-A	13	1466.36	131.121	1402	96	19
14	62	A	41.9281	1	2283	2283	211	A-A	dark	test	A	A	testA-A	14	311.288	335.31	211	284	51
14	63	A	39.4193	1	1285	1285	156	A-A	dark	test	A	A	testA-A	15	1291.2	217.201	1202	156	37
14	64	A	60.927	1	1817	1817	354	A-A	dark	test	A	A	testA-A	16	1429.32	436.404	1400	354	17
15	1	A	NA	0	timeout	20000	406	A-A	light	learning	A	A	learning	1	NA	NA	1514	568	12
15	2	B	11.0812	1	8198	8198	483	A-A	light	learning	A	A	learning	2	553.513	563.522	483	523	45
15	3	B	24.57	1	2436	2436	216	A-A	light	learning	A	A	learning	3	452.419	272.252	390	216	30
15	4	A	3.632	1	1288	1288	432	A-A	light	learning	A	A	learning	4	539.5	460.426	475	432	36
15	5	B	15.9467	1	1360	1360	116	A-A	light	learning	A	A	learning	5	790.732	153.142	743	116	22
15	6	A	23.7357	1	2461	2461	489	A-A	light	learning	A	A	learning	6	1334.24	542.502	1281	489	5
15	7	A	23.4061	1	2710	2710	233	A-A	light	learning	A	A	learning	7	1058.98	882.817	1019	847	35
15	8	B	19.8464	1	2312	2312	248	A-A	light	learning	A	A	learning	8	421.39	881.817	351	832	19
15	9	A	6.087	1	1597	1597	233	A-A	light	learning	A	A	learning	9	496.46	878.814	427	847	42
15	10	A	26.0161	1	3485	3485	380	A-A	light	learning	A	A	learning	10	1290.19	432.4	1243	380	26
15	11	B	0.5329	1	1181	1181	358	A-A	light	learning	A	A	learning	11	1125.04	753.698	1062	722	11
15	12	B	21.9286	1	1189	1189	429	A-A	light	learning	A	A	learning	12	496.46	679.629	429	627	38
15	13	B	6.7966	1	1473	1473	272	A-A	light	learning	A	A	learning	13	629.583	844.782	571	808	41
15	14	A	44.6754	1	913	913	408	A-A	light	learning	A	A	learning	14	559.518	484.449	493	408	4
15	15	B	26.7165	1	1050	1050	235	A-A	light	learning	A	A	learning	15	381.353	902.836	321	845	47
15	16	A	12.1011	1	2239	2239	112	A-A	light	learning	A	A	learning	16	763.707	154.143	707	112	51
15	17	A	4.4754	1	1300	1300	537	A-A	light	learning	A	A	learning	17	1120.04	569.527	1057	543	28
15	18	A	23.9277	1	1302	1302	426	A-A	light	learning	A	A	learning	18	1505.39	469.435	1463	426	34
15	19	B	3.4745	1	8277	8277	464	A-A	light	learning	A	A	learning	19	527.488	499.462	464	471	48
15	20	B	15.99	1	2740	2740	284	A-A	light	learning	A	A	learning	20	358.332	607.563	284	565	40
15	21	A	11.961	1	2319	2319	152	A-A	light	learning	A	A	learning	21	1681.56	963.893	1607	928	10
15	22	B	6.8181	1	1438	1438	258	A-A	light	learning	A	A	learning	22	706.654	859.796	646	822	15
15	23	B	6.9172	1	1705	1705	127	A-A	light	learning	A	A	learning	23	1677.55	987.915	1621	953	37
15	24	A	6.2688	1	2460	2460	473	A-A	light	learning	A	A	learning	24	533.494	576.534	473	539	21
15	25	A	17.268	1	1618	1618	265	A-A	light	learning	A	A	learning	25	1433.33	862.799	1375	815	13
15	26	B	18.2293	1	1220	1220	487	A-A	light	learning	A	A	learning	26	1293.2	641.594	1235	593	57
15	27	A	8.1705	1	4164	4164	137	A-A	light	learning	A	A	learning	27	1608.49	968.897	1539	943	43
15	28	B	5.6348	1	839	839	416	A-A	light	learning	A	A	learning	28	787.729	700.649	724	664	33
15	29	B	17.8376	1	3389	3389	460	A-A	light	learning	A	A	learning	29	1463.36	656.608	1417	620	56
15	30	A	7.478	1	6654	6654	273	A-A	light	learning	A	A	learning	30	330.306	822.762	273	787	23
15	31	A	31.1256	1	6536	6536	380	A-A	light	learning	A	A	learning	31	1556.44	427.396	1520	380	55
15	32	B	10.1747	1	987	987	368	A-A	light	learning	A	A	learning	32	650.602	741.687	578	712	3
15	33	A	13.481	1	1095	1095	405	A-A	light	search	A	A	searchA	1	1418.31	449.416	1360	405	57
15	34	A	17.9361	1	6008	6008	369	A-A	light	search	A	A	searchA	2	1525.41	416.385	1471	369	20
15	35	A	18.2293	1	1222	1222	521	A-A	light	search	A	A	searchA	3	662.614	607.563	605	559	33
15	36	A	1.8614	1	1608	1608	435	A-A	light	search	A	A	searchA	4	1213.12	677.627	1149	645	54
15	37	A	28.214	1	3255	3255	250	A-A	light	search	A	A	searchA	5	526.487	888.823	457	830	41
15	38	A	26.0161	1	4286	4286	276	A-A	light	search	A	A	searchA	6	413.383	328.304	366	276	18
15	39	A	6.2735	1	2460	2460	301	A-A	light	search	A	A	searchA	7	1579.46	327.303	1513	301	10
15	40	A	21.5893	1	3341	3341	311	A-A	light	search	A	A	searchA	8	1656.53	595.551	1609	550	28
15	41	A	10.0172	1	974	974	405	A-A	light	search	A	A	searchA	9	1343.24	446.413	1277	405	31
15	42	A	21.0127	1	1805	1805	430	A-A	light	search	A	A	searchA	10	1532.42	506.469	1490	476	3
15	43	A	9.8753	1	10191	10191	73	A-A	light	search	A	A	searchA	11	1412.31	96.089	1344	73	19
15	44	A	22.6416	1	2157	2157	194	A-A	light	search	A	A	searchA	12	427.396	938.869	371	886	23
15	45	A	11.1739	1	839	839	524	A-A	light	search	A	A	searchA	13	871.807	588.545	798	556	6
15	46	A	6.1735	1	1178	1178	155	A-A	light	search	A	A	searchA	14	1160.07	959.889	1092	925	47
15	47	A	27.6231	1	1071	1071	221	A-A	light	search	A	A	searchA	15	599.555	280.26	538	221	27
15	48	A	12.5758	1	1010	1010	232	A-A	light	search	A	A	searchA	16	363.336	271.251	290	232	17
15	49	A	37.8853	1	2142	2142	274	A-A	light	test	A	A	testA-A	1	316.293	842.78	274	780	6
15	50	A	2.5666	1	1534	1534	476	A-A	light	test	A	A	testA-A	2	541.501	597.553	476	565	4
15	51	A	16.8253	1	866	866	279	A-A	light	test	A	A	testA-A	3	858.795	327.303	793	279	44
15	52	A	27.4964	1	4448	4448	381	A-A	light	test	A	A	testA-A	4	675.626	385.357	613	381	51
15	53	A	27.6245	1	1000	1000	321	A-A	light	test	A	A	testA-A	5	982.91	375.348	936	321	23
15	54	A	17.9361	1	982	982	360	A-A	light	test	A	A	testA-A	6	1307.21	407.377	1253	360	35
15	55	A	18.2958	1	1289	1289	240	A-A	light	test	A	A	testA-A	7	1610.49	282.261	1562	240	41
15	56	A	23.0257	1	966	966	400	A-A	light	test	A	A	testA-A	8	508.471	438.406	423	400	17
15	57	A	19.2621	1	3658	3658	419	A-A	light	test	A	A	testA-A	9	753.698	709.657	699	661	20
15	58	A	16.1462	1	1327	1327	515	A-A	light	test	A	A	testA-A	10	591.548	553.513	515	531	25
15	59	A	9.5845	1	1025	1025	472	A-A	light	test	A	A	testA-A	11	562.521	513.475	500	472	22
15	60	A	30.0821	1	1760	1760	166	A-A	light	test	A	A	testA-A	12	241.223	696.645	166	638	55
15	61	A	19.7855	1	1729	1729	338	A-A	light	test	A	A	testA-A	13	1393.29	792.734	1327	742	10
15	62	A	22.3547	1	2249	2249	166	A-A	light	test	A	A	testA-A	14	1297.2	219.203	1240	166	26
15	63	A	23.0291	1	1698	1698	337	A-A	light	test	A	A	testA-A	15	584.541	783.726	543	743	14
15	64	A	18.512	1	851	851	509	A-A	light	test	A	A	testA-A	16	626.58	522.484	565	509	42
16	1	B	12.4467	1	1983	1983	419	A-A	dark	learning	A	A	learning	1	520.482	682.632	449	661	17
16	2	A	3.9807	1	2181	2181	347	A-A	dark	learning	A	A	learning	2	489.453	764.708	430	733	10
16	3	A	3.6879	1	2203	2203	303	A-A	dark	learning	A	A	learning	3	482.447	338.313	418	303	42
16	4	B	15.2377	1	3172	3172	286	A-A	dark	learning	A	A	learning	4	1285.19	836.775	1232	794	20
16	5	A	5.4762	1	1312	1312	381	A-A	dark	learning	A	A	learning	5	477.442	407.377	414	381	37
16	6	A	8.9745	1	1409	1409	450	A-A	dark	learning	A	A	learning	6	829.768	666.617	760	630	49
16	7	B	7.963	1	2344	2344	330	A-A	dark	learning	A	A	learning	7	528.489	361.335	473	330	29
16	8	B	12.5758	1	1579	1579	534	A-A	dark	learning	A	A	learning	8	1205.12	569.527	1130	534	39
16	9	A	10.9349	1	2776	2776	121	A-A	dark	learning	A	A	learning	9	1374.27	157.145	1321	121	46
16	10	B	4.0893	1	2036	2036	469	A-A	dark	learning	A	A	learning	10	804.745	645.598	740	611	50
16	11	A	6.2401	1	2157	2157	297	A-A	dark	learning	A	A	learning	11	913.846	812.753	845	783	13
16	12	B	9.0693	1	2354	2354	478	A-A	dark	learning	A	A	learning	12	1495.38	641.594	1429	602	55
16	13	A	9.4542	1	2527	2527	313	A-A	dark	learning	A	A	learning	13	902.836	806.747	836	767	28
16	14	B	11.7898	1	1598	1598	490	A-A	dark	learning	A	A	learning	14	1186.1	628.582	1114	590	8
16	15	A	18.355	1	1540	1540	405	A-A	dark	learning	A	A	learning	15	744.689	722.669	690	675	47
16	16	B	8.5889	1	1529	1529	417	A-A	dark	learning	A	A	learning	16	780.723	702.651	719	663	6
16	17	B	10.1369	1	2133	2133	307	A-A	dark	learning	A	A	learning	17	1685.56	394.365	1613	358	52
16	18	B	2.5322	1	1629	1629	481	A-A	dark	learning	A	A	learning	18	1111.03	632.586	1048	599	44
16	19	A	4.3409	1	2476	2476	415	A-A	dark	learning	A	A	learning	19	1476.37	697.646	1409	665	3
16	20	A	18.108	1	1828	1828	173	A-A	dark	learning	A	A	learning	20	1300.2	949.88	1251	907	1
16	21	A	17.452	1	1322	1322	96	A-A	dark	learning	A	A	learning	21	374.347	117.108	325	96	53
16	22	B	3.4225	1	4702	4702	200	A-A	dark	learning	A	A	learning	22	266.247	882.817	200	850	40
16	23	B	4.039	1	2013	2013	357	A-A	dark	learning	A	A	learning	23	915.848	750.695	851	723	21
16	24	A	10.367	1	1479	1479	376	A-A	dark	learning	A	A	learning	24	922.855	405.375	850	376	22
16	25	B	10.9619	1	1744	1744	215	A-A	dark	learning	A	A	learning	25	1376.27	895.83	1324	865	35
16	26	B	6.5712	1	1284	1284	271	A-A	dark	learning	A	A	learning	26	907.841	305.283	839	271	32
16	27	A	4.5986	1	1185	1185	398	A-A	dark	learning	A	A	learning	27	923.855	433.401	864	398	27
16	28	A	10.5228	1	2243	2243	224	A-A	dark	learning	A	A	learning	28	470.436	245.227	408	224	34
16	29	A	11.54	1	2617	2617	157	A-A	dark	learning	A	A	learning	29	528.489	965.894	465	923	25
16	30	B	5.2956	1	2474	2474	198	A-A	dark	learning	A	A	learning	30	1561.45	916.849	1502	882	51
16	31	A	11.54	1	1202	1202	435	A-A	dark	learning	A	A	learning	31	972.901	478.443	910	435	33
16	32	B	10.0679	1	1286	1286	194	A-A	dark	learning	A	A	learning	32	1011.94	227.21	959	194	5
16	33	A	9.2854	1	1166	1166	288	A-A	dark	search	A	A	searchA	1	728.675	317.294	675	288	2
16	34	A	16.2624	1	5488	5488	303	A-A	dark	search	A	A	searchA	2	382.354	687.637	303	659	25
16	35	A	8.0909	1	3785	3785	177	A-A	dark	search	A	A	searchA	3	237.22	270.25	177	231	8
16	36	A	16.9993	1	5204	5204	128	A-A	dark	search	A	A	searchA	4	1724.6	992.919	1648	952	30
16	37	A	9.2525	1	1053	1053	433	A-A	dark	search	A	A	searchA	5	984.912	682.632	914	647	6
16	38	A	7.4852	1	3615	3615	154	A-A	dark	search	A	A	searchA	6	224.208	540.5	154	511	10
16	39	A	17.6657	1	1326	1326	130	A-A	dark	search	A	A	searchA	7	244.226	166.154	164	130	13
16	40	A	1.7975	1	1624	1624	131	A-A	dark	search	A	A	searchA	8	1178.09	164.152	1116	131	40
16	41	A	10.9184	1	1012	1012	520	A-A	dark	search	A	A	searchA	9	909.842	541.501	844	520	31
16	42	A	12.5409	1	1016	1016	456	A-A	dark	search	A	A	searchA	10	928.86	480.445	856	456	49
16	43	A	9.1855	1	2203	2203	259	A-A	dark	search	A	A	searchA	11	1732.6	846.784	1661	817	5
16	44	A	10.9619	1	1212	1212	487	A-A	dark	search	A	A	searchA	12	589.546	510.473	533	487	34
16	45	A	15.0278	1	2185	2185	276	A-A	dark	search	A	A	searchA	13	690.639	833.772	643	804	48
16	46	A	11.8227	1	1107	1107	354	A-A	dark	search	A	A	searchA	14	462.428	376.349	392	354	52
16	47	A	8.7555	1	1610	1610	341	A-A	dark	search	A	A	searchA	15	1269.18	381.353	1208	341	33
16	48	A	16.4281	1	1154	1154	407	A-A	dark	search	A	A	searchA	16	816.756	710.658	739	673	20
16	49	A	13.8581	1	1051	1051	363	A-A	dark	test	A	A	testA-A	1	545.505	408.378	485	363	16
16	50	A	34.5337	1	1259	1259	349	A-A	dark	test	A	A	testA-A	2	484.449	407.377	399	349	3
16	51	A	17.6212	1	1398	1398	196	A-A	dark	test	A	A	testA-A	3	271.251	242.224	218	196	6
16	52	A	13.9299	1	1288	1288	229	A-A	dark	test	A	A	testA-A	4	298.276	871.807	229	828	42
16	53	A	14.6878	1	1814	1814	268	A-A	dark	test	A	A	testA-A	5	1564.45	857.794	1499	812	36
16	54	A	13.2942	1	1122	1122	292	A-A	dark	test	A	A	testA-A	6	425.394	826.765	373	788	56
16	55	A	11.1661	1	2713	2713	151	A-A	dark	test	A	A	testA-A	7	318.295	958.888	244	929	19
16	56	A	13.1987	1	1965	1965	176	A-A	dark	test	A	A	testA-A	8	1152.07	210.195	1102	176	25
16	57	A	19.4802	1	1707	1707	479	A-A	dark	test	A	A	testA-A	9	1195.11	619.574	1147	601	52
16	58	A	9.5845	1	1635	1635	325	A-A	dark	test	A	A	testA-A	10	1102.02	779.722	1032	755	40
16	59	A	16.5201	1	2930	2930	134	A-A	dark	test	A	A	testA-A	11	1488.38	960.89	1424	946	48
16	60	A	9.6729	1	1078	1078	515	A-A	dark	test	A	A	testA-A	12	1221.13	603.559	1152	565	43
16	61	A	10.1369	1	1309	1309	413	A-A	dark	test	A	A	testA-A	13	1096.01	702.651	1024	667	1
16	62	A	6.5712	1	1567	1567	275	A-A	dark	test	A	A	testA-A	14	689.639	838.777	621	805	53
16	63	A	9.7009	1	2001	2001	281	A-A	dark	test	A	A	testA-A	15	1569.45	820.76	1504	799	24
16	64	A	30.826	1	1861	1861	315	A-A	dark	test	A	A	testA-A	16	1639.52	755.7	1605	714	29
17	1	A	4.6303	1	1976	1976	178	A-A	light	learning	A	A	learning	1	567.525	214.198	505	178	13
17	2	B	18.6604	1	1586	1586	287	A-A	light	learning	A	A	learning	2	1306.21	337.312	1241	287	17
17	3	B	20.2243	1	2294	2294	488	A-A	light	learning	A	A	learning	3	559.518	616.571	488	567	11
17	4	A	18.8987	1	2669	2669	142	A-A	light	learning	A	A	learning	4	1553.44	188.174	1478	142	47
17	5	A	15.6275	1	2546	2546	183	A-A	light	learning	A	A	learning	5	245.227	932.864	197	897	54
17	6	B	24.5545	1	2237	2237	457	A-A	light	learning	A	A	learning	6	513.475	519.481	457	464	43
17	7	A	8.7254	1	1683	1683	277	A-A	light	learning	A	A	learning	7	1388.29	825.765	1323	803	16
17	8	B	7.5524	1	2637	2637	144	A-A	light	learning	A	A	learning	8	536.497	959.889	472	936	51
17	9	B	NA	0	timeout	20000	359	A-A	light	learning	A	A	learning	9	NA	NA	1503	359	55
17	10	A	24.4402	1	3129	3129	81	A-A	light	learning	A	A	learning	10	1472.36	95.088	1392	81	44
17	11	B	1.0538	1	3680	3680	239	A-A	light	learning	A	A	learning	11	301.279	764.708	239	734	39
17	12	A	6.8181	1	1202	1202	284	A-A	light	learning	A	A	learning	12	794.736	322.298	734	284	25
17	13	A	63.4037	1	1766	1766	294	A-A	light	learning	A	A	learning	13	1130.05	878.814	1052	786	57
17	14	B	10.2678	1	1899	1899	147	A-A	light	learning	A	A	learning	14	1219.13	954.884	1160	933	33
17	15	A	17.9361	1	4734	4734	218	A-A	light	learning	A	A	learning	15	803.744	265.246	750	218	29
17	16	B	6.8523	1	1375	1375	205	A-A	light	learning	A	A	learning	16	978.906	243.225	914	205	35
17	17	B	17.8367	1	1227	1227	306	A-A	light	learning	A	A	learning	17	1001.93	347.322	924	306	18
17	18	A	13.9784	1	1221	1221	315	A-A	light	learning	A	A	learning	18	762.706	355.329	689	315	22
17	19	B	18.6901	1	4135	4135	367	A-A	light	learning	A	A	learning	19	1080	753.698	1001	713	4
17	20	A	13.8153	1	4759	4759	273	A-A	light	learning	A	A	learning	20	894.828	300.278	819	273	53
17	21	A	25.0688	1	3162	3162	311	A-A	light	learning	A	A	learning	21	1661.54	635.588	1609	582	41
17	22	B	13.3906	1	3793	3793	303	A-A	light	learning	A	A	learning	22	1232.14	342.317	1158	303	31
17	23	A	11.0412	1	5897	5897	361	A-A	light	learning	A	A	learning	23	1083	754.699	1010	719	52
17	24	B	15.9634	1	1398	1398	222	A-A	light	learning	A	A	learning	24	1602.48	876.812	1549	858	9
17	25	A	6.5489	1	1739	1739	210	A-A	light	learning	A	A	learning	25	279.259	696.645	210	668	14
17	26	B	6.0444	1	3037	3037	338	A-A	light	learning	A	A	learning	26	1285.19	366.339	1227	338	19
17	27	A	25.1428	1	850	850	485	A-A	light	learning	A	A	learning	27	820.76	647.6	771	595	32
17	28	B	15.4278	1	1626	1626	376	A-A	light	learning	A	A	learning	28	1616.5	661.613	1544	643	1
17	29	B	11.1985	1	1385	1385	306	A-A	light	learning	A	A	learning	29	365.338	494.458	306	473	36
17	30	A	12.4467	1	1835	1835	364	A-A	light	learning	A	A	learning	30	465.431	737.683	394	716	8
17	31	B	21.9876	1	1918	1918	514	A-A	light	learning	A	A	learning	31	1274.18	565.524	1201	514	38
17	32	A	9.079	1	1024	1024	504	A-A	light	learning	A	A	learning	32	1043.97	606.562	972	576	37
17	33	A	18.5183	1	2286	2286	140	A-A	light	search	A	A	searchA	1	204.189	823.763	140	811	28
17	34	A	14.0635	1	1983	1983	272	A-A	light	search	A	A	searchA	2	373.346	298.276	323	272	20
17	35	A	41.3393	1	15992	15992	261	A-A	light	search	A	A	searchA	3	365.338	557.516	261	530	55
17	36	A	30.0821	1	1772	1772	340	A-A	light	search	A	A	searchA	4	1199.11	798.74	1124	740	44
17	37	A	15.3608	1	1573	1573	237	A-A	light	search	A	A	searchA	5	295.273	690.639	237	645	3
17	38	A	48.7341	1	1783	1783	277	A-A	light	search	A	A	searchA	6	1033.96	357.331	975	277	30
17	39	A	11.6627	1	2102	2102	313	A-A	light	search	A	A	searchA	7	1661.54	365.338	1607	341	56
17	40	A	12.6513	1	2087	2087	72	A-A	light	search	A	A	searchA	8	1302.21	91.0843	1237	72	33
17	41	A	17.268	1	862	862	381	A-A	light	search	A	A	searchA	9	1026.95	429.398	969	381	22
17	42	A	28.6865	1	3384	3384	138	A-A	light	search	A	A	searchA	10	1221.13	952.882	1138	942	36
17	43	A	23.0896	1	2110	2110	131	A-A	light	search	A	A	searchA	11	1214.12	178.165	1134	131	53
17	44	A	16.5879	1	2477	2477	129	A-A	light	search	A	A	searchA	12	253.234	145.134	196	129	57
17	45	A	22.644	1	2825	2825	411	A-A	light	search	A	A	searchA	13	1167.08	722.669	1102	669	14
17	46	A	33.6996	1	1248	1248	324	A-A	light	search	A	A	searchA	14	1025.95	389.361	960	324	43
17	47	A	1.1594	1	996	996	376	A-A	light	search	A	A	searchA	15	440.408	567.525	376	536	40
17	48	A	23.0139	1	4998	4998	79	A-A	light	search	A	A	searchA	16	207.192	112.104	167	79	46
17	49	A	13.6805	1	1234	1234	433	A-A	light	test	A	A	testA-A	1	1069.99	691.64	1009	647	39
17	50	A	32.5441	1	1974	1974	314	A-A	light	test	A	A	testA-A	2	1462.35	377.349	1407	314	32
17	51	A	33.7744	1	6093	6093	191	A-A	light	test	A	A	testA-A	3	647.6	930.862	553	889	12
17	52	A	41.6136	1	1536	1536	329	A-A	light	test	A	A	testA-A	4	357.331	691.64	329	638	42
17	53	A	11.3581	1	1489	1489	382	A-A	light	test	A	A	testA-A	5	808.749	723.67	756	698	54
17	54	A	6.2173	1	742	742	508	A-A	light	test	A	A	testA-A	6	646.599	534.495	587	508	46
17	55	A	14.5731	1	752	752	455	A-A	light	test	A	A	testA-A	7	851.789	501.464	790	455	53
17	56	A	17.7908	1	3194	3194	88	A-A	light	test	A	A	testA-A	8	1712.59	137.127	1653	88	41
17	57	A	21.6757	1	995	995	338	A-A	light	test	A	A	testA-A	9	670.621	787.729	592	742	21
17	58	A	32.5003	1	1709	1709	261	A-A	light	test	A	A	testA-A	10	1211.12	323.299	1137	261	44
17	59	A	11.601	1	4552	4552	492	A-A	light	test	A	A	testA-A	11	1404.3	520.482	1330	492	11
17	60	A	26.0271	1	856	856	518	A-A	light	test	A	A	testA-A	12	932.864	618.573	875	562	8
17	61	A	10.9646	1	738	738	441	A-A	light	test	A	A	testA-A	13	1053.98	473.438	1002	441	15
17	62	A	27.5769	1	3207	3207	222	A-A	light	test	A	A	testA-A	14	1662.54	866.803	1615	858	35
17	63	A	2.5666	1	848	848	371	A-A	light	test	A	A	testA-A	15	644.597	741.687	580	709	52
17	64	A	22.4566	1	4933	4933	159	A-A	light	test	A	A	testA-A	16	1601.48	177.164	1556	159	6
18	1	B	12.1956	1	746	746	74	A-A	dark	learning	A	A	learning	1	1511.4	117.108	1452	74	43
18	2	A	7.4225	1	912	912	182	A-A	dark	learning	A	A	learning	2	984.912	219.203	927	182	31
18	3	B	28.357	1	1145	1145	230	A-A	dark	learning	A	A	learning	3	283.262	564.523	230	506	21
18	4	A	46.5569	1	980	980	378	A-A	dark	learning	A	A	learning	4	467.433	679.629	378	610	3
18	5	A	5.8656	1	860	860	218	A-A	dark	learning	A	A	learning	5	820.76	255.236	760	218	25
18	6	B	35.8298	1	1280	1280	90	A-A	dark	learning	A	A	learning	6	1687.56	154.143	1640	90	27
18	7	B	13.3133	1	996	996	326	A-A	dark	learning	A	A	learning	7	402.373	429.398	326	395	5
18	8	A	31.0395	1	981	981	445	A-A	dark	learning	A	A	learning	8	1461.35	503.466	1382	445	37
18	9	B	14.5812	1	984	984	518	A-A	dark	learning	A	A	learning	9	1010.94	564.523	947	518	23
18	10	A	18.3024	1	1223	1223	161	A-A	dark	learning	A	A	learning	10	1161.08	196.182	1116	161	38
18	11	A	12.9622	1	957	957	308	A-A	dark	learning	A	A	learning	11	1498.39	339.314	1448	308	33
18	12	B	13.5418	1	4813	4813	165	A-A	dark	learning	A	A	learning	12	1339.24	959.889	1276	915	2
18	13	B	11.0812	1	2399	2399	263	A-A	dark	learning	A	A	learning	13	1470.36	856.793	1400	817	6
18	14	A	16.0819	1	1064	1064	389	A-A	dark	learning	A	A	learning	14	462.428	571.529	389	527	8
18	15	B	20.8197	1	2848	2848	272	A-A	dark	learning	A	A	learning	15	1622.5	824.764	1574	808	46
18	16	A	20.2602	1	4129	4129	369	A-A	dark	learning	A	A	learning	16	982.91	397.368	940	369	29
18	17	B	18.9827	1	1010	1010	425	A-A	dark	learning	A	A	learning	17	837.776	697.646	760	655	7
18	18	A	12.2179	1	946	946	495	A-A	dark	learning	A	A	learning	18	645.598	529.49	595	495	57
18	19	A	15.2202	1	1097	1097	294	A-A	dark	learning	A	A	learning	19	623.577	339.314	568	294	54
18	20	B	4.211	1	778	778	435	A-A	dark	learning	A	A	learning	20	744.689	465.431	686	435	12
18	21	B	23.8251	1	1045	1045	389	A-A	dark	learning	A	A	learning	21	1579.46	466.432	1531	416	14
18	22	A	13.7838	1	2038	2038	259	A-A	dark	learning	A	A	learning	22	565.524	300.278	512	259	30
18	23	A	18.1358	1	719	719	431	A-A	dark	learning	A	A	learning	23	807.748	465.431	763	431	47
18	24	B	10.5339	1	794	794	483	A-A	dark	learning	A	A	learning	24	569.527	504.467	505	483	18
18	25	A	10.1369	1	1355	1355	311	A-A	dark	learning	A	A	learning	25	605.561	804.745	533	769	44
18	26	A	3.8452	1	1234	1234	424	A-A	dark	learning	A	A	learning	26	1485.38	453.42	1425	424	34
18	27	B	61.9177	1	8733	8733	248	A-A	dark	learning	A	A	learning	27	663.615	817.757	643	832	26
18	29	B	3.1454	1	1165	1165	190	A-A	dark	learning	A	A	learning	29	251.233	890.825	190	862	10
18	30	A	27.8357	1	2884	2884	78	A-A	dark	learning	A	A	learning	30	1681.56	137.127	1623	78	56
18	31	B	24.8092	1	3867	3867	140	A-A	dark	learning	A	A	learning	31	680.63	982.91	640	940	55
18	32	A	54.9196	1	3085	3085	134	A-A	dark	learning	A	A	learning	32	1412.31	210.195	1317	134	51
18	33	A	12.8243	1	912	912	418	A-A	dark	search	A	A	searchA	1	682.632	443.411	609	418	19
18	34	A	32.1839	1	1317	1317	307	A-A	dark	search	A	A	searchA	2	347.322	659.611	307	606	57
18	35	A	9.4135	1	769	769	446	A-A	dark	search	A	A	searchA	3	518.48	598.554	446	565	50
18	36	A	7.0178	1	803	803	385	A-A	dark	search	A	A	searchA	4	454.421	422.391	385	387	10
18	37	A	3.1915	1	704	704	413	A-A	dark	search	A	A	searchA	5	591.548	447.414	530	413	40
18	38	A	25.7355	1	902	902	172	A-A	dark	search	A	A	searchA	6	238.221	467.433	172	410	52
18	39	A	25.6728	1	1273	1273	423	A-A	dark	search	A	A	searchA	7	1546.43	575.533	1497	522	53
18	40	A	12.4161	1	1787	1787	241	A-A	dark	search	A	A	searchA	8	1404.3	879.815	1349	839	9
18	41	A	11.7898	1	807	807	222	A-A	dark	search	A	A	searchA	9	294.272	803.744	222	765	48
18	42	A	29.1202	1	1255	1255	438	A-A	dark	search	A	A	searchA	10	1459.35	689.639	1420	642	56
18	43	A	20.2359	1	956	956	455	A-A	dark	search	A	A	searchA	11	984.912	670.621	908	625	8
18	44	A	28.5752	1	2581	2581	166	A-A	dark	search	A	A	searchA	12	230.213	616.571	166	557	17
18	45	A	23.5629	1	1300	1300	209	A-A	dark	search	A	A	searchA	13	1293.2	910.843	1252	871	46
18	46	A	23.7717	1	744	744	388	A-A	dark	search	A	A	searchA	14	439.407	472.437	388	420	14
18	47	A	4.6303	1	706	706	483	A-A	dark	search	A	A	searchA	15	625.579	519.481	564	483	2
18	48	A	15.2834	1	2686	2686	261	A-A	dark	search	A	A	searchA	16	914.847	860.797	841	819	33
18	49	A	39.0599	1	1422	1422	111	A-A	dark	test	A	A	testA-A	1	1647.53	145.134	1624	111	27
18	50	A	52.9619	1	3050	3050	203	A-A	dark	test	A	A	testA-A	2	318.295	343.318	203	321	25
18	51	A	7.8728	1	1221	1221	261	A-A	dark	test	A	A	testA-A	3	1552.44	846.784	1482	819	26
18	52	A	16.5733	1	1327	1327	193	A-A	dark	test	A	A	testA-A	4	248.23	678.628	193	633	51
18	53	A	21.7288	1	1445	1445	94	A-A	dark	test	A	A	testA-A	5	549.509	146.135	479	94	39
18	54	A	18.5259	1	1845	1845	172	A-A	dark	test	A	A	testA-A	6	1203.11	221.205	1146	172	2
18	55	A	27.4211	1	826	826	173	A-A	dark	test	A	A	testA-A	7	219.203	534.495	173	481	56
18	56	A	10.2678	1	1613	1613	133	A-A	dark	test	A	A	testA-A	8	192.178	299.277	133	277	40
18	57	A	34.6701	1	1521	1521	180	A-A	dark	test	A	A	testA-A	9	853.79	910.843	819	900	21
18	58	A	6.5712	1	765	765	496	A-A	dark	test	A	A	testA-A	10	569.527	617.572	500	584	44
18	59	A	21.6757	1	2475	2475	372	A-A	dark	test	A	A	testA-A	11	1147.06	753.698	1068	708	16
18	60	A	27.0469	1	963	963	512	A-A	dark	test	A	A	testA-A	12	1109.03	611.566	1070	568	5
18	61	A	27.0875	1	7784	7784	415	A-A	dark	test	A	A	testA-A	13	640.593	695.644	551	665	19
18	62	A	29.3091	1	4701	4701	140	A-A	dark	test	A	A	testA-A	14	1219.13	959.889	1183	940	29
18	63	A	8.2962	1	1054	1054	422	A-A	dark	test	A	A	testA-A	15	909.842	693.642	854	658	4
18	64	A	22.2758	1	2344	2344	152	A-A	dark	test	A	A	testA-A	16	1450.34	974.903	1403	928	37
19	1	A	1.1843	1	1621	1621	522	A-A	light	learning	A	A	learning	1	743.689	589.546	680	558	39
19	2	B	41.7657	1	2195	2195	254	A-A	light	learning	A	A	learning	2	923.855	327.303	857	254	48
19	3	A	7.5712	1	1361	1361	219	A-A	light	learning	A	A	learning	3	820.76	255.236	752	219	1
19	4	B	20.054	1	2376	2376	472	A-A	light	learning	A	A	learning	4	1348.25	510.473	1304	472	10
19	5	A	11.5074	1	1415	1415	353	A-A	light	learning	A	A	learning	5	1323.23	388.36	1271	353	33
19	6	B	9.6858	1	1492	1492	497	A-A	light	learning	A	A	learning	6	1246.15	619.574	1191	583	9
19	7	A	10.2503	1	1346	1346	463	A-A	light	learning	A	A	learning	7	1041.96	502.465	986	463	28
19	8	B	32.954	1	4024	4024	274	A-A	light	learning	A	A	learning	8	555.514	864.801	474	806	50
19	9	B	19.7678	1	1420	1420	405	A-A	light	learning	A	A	learning	9	465.431	640.593	405	590	37
19	10	B	45.2737	1	1922	1922	167	A-A	light	learning	A	A	learning	10	1309.21	988.916	1254	913	11
19	11	A	33.6136	1	2439	2439	270	A-A	light	learning	A	A	learning	11	1617.5	847.785	1587	810	4
19	12	A	24.9704	1	2314	2314	130	A-A	light	learning	A	A	learning	12	245.227	162.15	207	130	21
19	13	A	40.8815	1	1766	1766	240	A-A	light	learning	A	A	learning	13	308.285	731.678	240	660	3
19	14	A	36.337	1	6440	6440	138	A-A	light	learning	A	A	learning	14	343.318	939.87	266	942	41
19	15	B	26.8783	1	1294	1294	391	A-A	light	learning	A	A	learning	15	666.617	446.413	617	391	36
19	16	B	36.3681	1	1359	1359	234	A-A	light	learning	A	A	learning	16	315.292	834.773	234	772	27
19	17	B	17.3245	1	2116	2116	366	A-A	light	learning	A	A	learning	17	492.456	410.38	441	366	6
19	18	A	43.572	1	1594	1594	331	A-A	light	learning	A	A	learning	18	416.385	796.738	331	728	22
19	19	A	21.5492	1	1297	1297	217	A-A	light	learning	A	A	learning	19	1262.17	270.25	1199	217	40
19	20	B	8.7822	1	1837	1837	439	A-A	light	learning	A	A	learning	20	1538.42	467.433	1467	439	8
19	21	B	16.0091	1	1290	1290	536	A-A	light	learning	A	A	learning	21	589.546	586.543	536	543	54
19	22	A	27.0749	1	2506	2506	244	A-A	light	learning	A	A	learning	22	1525.41	892.827	1471	836	43
19	23	A	22.9685	1	1819	1819	493	A-A	light	learning	A	A	learning	23	935.866	639.592	881	587	29
19	24	B	18.5898	1	4673	4673	252	A-A	light	learning	A	A	learning	24	845.783	293.272	799	252	45
19	25	A	56.6493	1	1250	1250	353	A-A	light	learning	A	A	learning	25	807.748	440.408	756	353	13
19	26	A	21.3915	1	2447	2447	254	A-A	light	learning	A	A	learning	26	311.288	343.318	254	291	5
19	27	B	24.0172	1	1594	1594	340	A-A	light	learning	A	A	learning	27	389.361	585.542	340	534	20
19	28	B	38.9814	1	4453	4453	102	A-A	light	learning	A	A	learning	28	1177.09	134.124	1153	102	25
19	29	A	9.224	1	2077	2077	257	A-A	light	learning	A	A	learning	29	849.787	284.263	779	257	19
19	30	A	6.4635	1	1683	1683	195	A-A	light	learning	A	A	learning	30	859.796	918.851	803	885	49
19	31	B	15.4069	1	1953	1953	215	A-A	light	learning	A	A	learning	31	269.249	389.361	215	345	57
19	32	B	7.6338	1	1198	1198	358	A-A	light	learning	A	A	learning	32	1129.05	759.703	1070	722	47
19	33	A	9.4542	1	1209	1209	160	A-A	light	search	A	A	searchA	1	892.827	200.185	826	160	38
19	34	A	25.2416	1	1064	1064	317	A-A	light	search	A	A	searchA	2	1120.04	783.726	1080	763	36
19	35	A	13.1467	1	1277	1277	373	A-A	light	search	A	A	searchA	3	1551.44	417.387	1492	373	21
19	36	A	6.1735	1	1885	1885	223	A-A	light	search	A	A	searchA	4	961.891	891.826	894	857	4
19	37	A	14.4847	1	1402	1402	380	A-A	light	search	A	A	searchA	5	713.661	402.373	662	380	6
19	38	A	3.1454	1	1539	1539	517	A-A	light	search	A	A	searchA	6	1067.99	591.548	1007	563	47
19	39	A	21.5697	1	1585	1585	322	A-A	light	search	A	A	searchA	7	649.601	375.348	588	322	16
19	40	A	7.8988	1	1450	1450	411	A-A	light	search	A	A	searchA	8	1495.38	446.413	1425	411	43
19	41	A	17.526	1	1857	1857	196	A-A	light	search	A	A	searchA	9	253.234	795.737	196	781	46
19	42	A	28.707	1	1282	1282	123	A-A	light	search	A	A	searchA	10	770.714	183.17	711	123	10
19	43	A	16.0656	1	1002	1002	397	A-A	light	search	A	A	searchA	11	1545.43	729.676	1478	683	57
19	44	A	14.4168	1	2272	2272	207	A-A	light	search	A	A	searchA	12	553.513	252.233	495	207	39
19	45	A	20.9958	1	971	971	319	A-A	light	search	A	A	searchA	13	1146.06	773.716	1093	761	50
19	46	A	17.1426	1	1098	1098	523	A-A	light	search	A	A	searchA	14	846.784	589.546	767	557	14
19	47	A	23.1991	1	2270	2270	231	A-A	light	search	A	A	searchA	15	1427.32	277.257	1346	231	55
19	48	A	8.8828	1	1350	1350	310	A-A	light	search	A	A	searchA	16	1143.06	806.747	1087	770	30
19	49	A	14.8616	1	2400	2400	376	A-A	light	test	A	A	testA-A	1	1565.45	395.366	1494	376	33
19	50	A	14.6112	1	1450	1450	222	A-A	light	test	A	A	testA-A	2	1331.23	898.832	1257	858	10
19	51	A	17.8904	1	1359	1359	419	A-A	light	test	A	A	testA-A	3	668.619	675.626	613	661	40
19	52	A	38.063	1	2863	2863	126	A-A	light	test	A	A	testA-A	4	294.272	191.177	249	126	39
19	53	A	13.782	1	2040	2040	377	A-A	light	test	A	A	testA-A	5	1083	398.369	1029	377	29
19	54	A	26.0879	1	2182	2182	354	A-A	light	test	A	A	testA-A	6	1560.44	777.72	1481	726	21
19	55	A	29.2847	1	1821	1821	205	A-A	light	test	A	A	testA-A	7	776.719	250.232	740	205	5
19	56	A	15.0797	1	1503	1503	474	A-A	light	test	A	A	testA-A	8	1012.94	636.589	935	606	27
19	57	A	30.5837	1	1252	1252	91	A-A	light	test	A	A	testA-A	9	1312.21	151.14	1260	91	32
19	58	A	12.1956	1	1278	1278	92	A-A	light	test	A	A	testA-A	10	1065.99	135.125	1007	92	25
19	59	A	21.146	1	909	909	239	A-A	light	test	A	A	testA-A	11	1474.37	290.269	1403	239	34
19	60	A	14.0383	1	1490	1490	122	A-A	light	test	A	A	testA-A	12	1417.31	155.144	1368	122	24
19	61	A	4.0965	1	1500	1500	306	A-A	light	test	A	A	testA-A	13	1069.99	338.313	1003	306	20
19	62	A	25.7365	1	1255	1255	350	A-A	light	test	A	A	testA-A	14	1647.53	408.378	1570	355	44
19	63	A	29.0891	1	1709	1709	130	A-A	light	test	A	A	testA-A	15	1330.23	980.908	1238	950	11
19	64	A	66.8071	1	1422	1422	216	A-A	light	test	A	A	testA-A	16	245.227	629.583	216	656	56
20	1	A	19.6436	1	882	882	245	A-A	dark	learning	A	A	learning	1	1048.97	296.274	988	245	47
20	2	B	14.0127	1	1071	1071	506	A-A	dark	learning	A	A	learning	2	1338.24	549.509	1283	506	33
20	3	A	7.5364	1	1758	1758	229	A-A	dark	learning	A	A	learning	3	362.336	889.824	299	851	27
20	4	B	37.2605	1	4116	4116	266	A-A	dark	learning	A	A	learning	4	714.662	301.279	615	266	39
20	5	B	19.6332	1	2753	2753	157	A-A	dark	learning	A	A	learning	5	232.215	934.866	157	919	40
20	6	A	23.7343	1	1177	1177	393	A-A	dark	learning	A	A	learning	6	598.554	741.687	538	687	45
20	7	B	14.2973	1	5170	5170	195	A-A	dark	learning	A	A	learning	7	272.252	644.597	195	611	25
20	8	A	29.57	1	7080	7080	402	A-A	dark	learning	A	A	learning	8	1286.19	404.374	1221	402	53
20	10	B	30.8871	1	1879	1879	214	A-A	dark	learning	A	A	learning	10	792.734	913.846	704	866	29
20	11	A	5.8656	1	1886	1886	190	A-A	dark	learning	A	A	learning	11	1150.06	926.858	1089	890	15
20	12	B	26.6417	1	2197	2197	268	A-A	dark	learning	A	A	learning	12	1697.57	635.588	1652	584	55
20	13	B	18.4059	1	2129	2129	303	A-A	dark	learning	A	A	learning	13	632.586	804.745	552	777	18
20	14	A	26.4379	1	4293	4293	154	A-A	dark	learning	A	A	learning	14	1711.58	200.185	1627	154	2
20	15	B	13.0812	1	8292	8292	332	A-A	dark	learning	A	A	learning	15	1227.14	779.722	1151	748	17
20	16	A	22.0789	1	1722	1722	371	A-A	dark	learning	A	A	learning	16	1386.28	384.356	1311	371	52
20	17	B	25.3549	1	3532	3532	339	A-A	dark	learning	A	A	learning	17	422.391	697.646	339	682	31
20	18	A	27.6959	1	3687	3687	192	A-A	dark	learning	A	A	learning	18	965.894	892.827	895	888	22
20	19	A	23.9205	1	3288	3288	251	A-A	dark	learning	A	A	learning	19	1629.51	850.788	1588	829	37
20	20	B	24.2789	1	1039	1039	482	A-A	dark	learning	A	A	learning	20	663.615	636.589	578	598	28
20	21	B	43.6503	1	1602	1602	196	A-A	dark	learning	A	A	learning	21	319.296	926.858	214	884	46
20	22	A	6.1403	1	928	928	367	A-A	dark	learning	A	A	learning	22	1007.93	395.366	940	367	8
20	23	A	27.3128	1	2367	2367	245	A-A	dark	learning	A	A	learning	23	335.31	473.438	245	438	49
20	24	B	10.3133	1	842	842	447	A-A	dark	learning	A	A	learning	24	873.809	654.606	807	633	4
20	25	B	35.3991	1	810	810	474	A-A	dark	learning	A	A	learning	25	896.83	515.477	800	474	36
20	26	B	22.0851	1	3352	3352	186	A-A	dark	learning	A	A	learning	26	319.296	218.202	234	186	48
20	27	A	2.7013	1	15239	15239	354	A-A	dark	learning	A	A	learning	27	1554.44	759.703	1492	726	6
20	28	A	40.1952	1	1079	1079	403	A-A	dark	learning	A	A	learning	28	556.515	692.641	456	677	38
20	29	A	35.8909	1	1108	1108	297	A-A	dark	learning	A	A	learning	29	550.51	837.776	460	783	19
20	30	B	11.0786	1	4598	4598	425	A-A	dark	learning	A	A	learning	30	499.462	474.439	425	443	34
20	31	B	5.3451	1	3779	3779	142	A-A	dark	learning	A	A	learning	31	1215.13	965.894	1148	938	23
20	32	A	29.846	1	874	874	514	A-A	dark	learning	A	A	learning	32	959.889	558.517	870	514	56
20	33	A	32.6324	1	952	952	266	A-A	dark	search	A	A	searchA	1	1338.24	304.282	1307	266	31
20	34	A	12.6878	1	1565	1565	320	A-A	dark	search	A	A	searchA	2	1600.48	801.742	1530	760	14
20	35	A	22.6416	1	1339	1339	283	A-A	dark	search	A	A	searchA	3	1151.07	849.787	1095	797	39
20	36	A	20.8754	1	1808	1808	192	A-A	dark	search	A	A	searchA	4	274.254	751.696	192	729	30
20	37	A	11.5074	1	843	843	525	A-A	dark	search	A	A	searchA	5	774.717	589.546	723	555	45
20	38	A	28.9	1	2358	2358	300	A-A	dark	search	A	A	searchA	6	932.864	833.772	852	780	28
20	39	A	16.5786	1	1107	1107	225	A-A	dark	search	A	A	searchA	7	837.776	871.807	767	855	54
20	40	A	37.1951	1	8122	8122	64	A-A	dark	search	A	A	searchA	8	613.568	70.0649	523	64	43
20	41	A	9.9821	1	2622	2622	481	A-A	dark	search	A	A	searchA	9	581.538	522.484	521	481	40
20	42	A	28.4977	1	1066	1066	230	A-A	dark	search	A	A	searchA	10	948.879	250.232	860	230	34
20	43	A	36.0075	1	4524	4524	126	A-A	dark	search	A	A	searchA	11	930.862	986.914	904	954	13
20	44	A	16.0091	1	2768	2768	380	A-A	dark	search	A	A	searchA	12	1427.32	743.689	1374	700	37
20	45	A	18.9666	1	1122	1122	378	A-A	dark	search	A	A	searchA	13	1586.47	647.6	1542	616	3
20	46	A	30.5136	1	970	970	479	A-A	dark	search	A	A	searchA	14	909.842	649.601	872	601	15
20	47	A	20.2359	1	1251	1251	390	A-A	dark	search	A	A	searchA	15	1522.41	723.67	1439	690	5
20	48	A	10.747	1	861	861	447	A-A	dark	search	A	A	searchA	16	769.713	469.435	702	447	4
20	49	A	21.4457	1	1345	1345	172	A-A	dark	test	A	A	testA-A	1	1188.1	943.874	1146	908	26
20	50	A	23.1632	1	1739	1739	153	A-A	dark	test	A	A	testA-A	2	1708.58	939.87	1660	927	52
20	51	A	32.9758	1	1374	1374	392	A-A	dark	test	A	A	testA-A	3	477.442	659.611	392	653	39
20	52	A	18.5192	1	3651	3651	100	A-A	dark	test	A	A	testA-A	4	538.499	147.136	465	100	22
20	53	A	3.3185	1	2811	2811	155	A-A	dark	test	A	A	testA-A	5	784.727	188.174	725	155	41
20	54	A	29.5716	1	2483	2483	127	A-A	dark	test	A	A	testA-A	6	213.197	888.823	127	876	43
20	55	A	32.2226	1	1217	1217	300	A-A	dark	test	A	A	testA-A	7	1160.07	802.743	1066	780	8
20	56	A	1.1843	1	2886	2886	143	A-A	dark	test	A	A	testA-A	8	272.252	968.897	208	937	31
20	57	A	44.5777	1	1208	1208	237	A-A	dark	test	A	A	testA-A	9	1422.32	891.826	1400	843	11
20	58	A	11.1661	1	1777	1777	513	A-A	dark	test	A	A	testA-A	10	954.884	543.503	881	513	23
20	59	A	35.8795	1	1549	1549	387	A-A	dark	test	A	A	testA-A	11	1318.22	430.399	1289	387	55
20	60	A	3.9807	1	1118	1118	502	A-A	dark	test	A	A	testA-A	12	1115.03	605.561	1054	578	38
20	61	A	1.1843	1	1383	1383	193	A-A	dark	test	A	A	testA-A	13	447.414	918.851	383	887	30
20	62	A	17.9361	1	847	847	496	A-A	dark	test	A	A	testA-A	14	1072.99	630.584	1019	584	54
20	63	A	29.3363	1	2709	2709	215	A-A	dark	test	A	A	testA-A	15	573.531	274.254	500	215	2
20	64	A	5.3451	1	2606	2606	146	A-A	dark	test	A	A	testA-A	16	1376.27	961.891	1309	934	9
21	1	A	5.8656	1	3063	3063	513	A-B	light	learning	A	B	learning	1	1395.29	550.51	1334	513	31
21	2	A	13.5307	1	1742	1742	356	A-B	light	learning	A	B	learning	2	426.395	445.412	356	402	19
21	3	B	19.3065	1	3646	3646	381	A-B	light	learning	A	B	learning	3	1404.3	746.691	1351	699	29
21	4	B	10.9745	1	1835	1835	336	A-B	light	learning	A	B	learning	4	1228.14	785.727	1162	744	4
21	5	A	13.6227	1	3105	3105	240	A-B	light	learning	A	B	learning	5	1287.19	877.813	1236	840	48
21	6	A	6.5355	1	2257	2257	225	A-B	light	learning	A	B	learning	6	410.38	263.244	347	225	35
21	7	B	13.5242	1	1320	1320	341	A-B	light	learning	A	B	learning	7	826.765	385.357	759	341	10
21	8	B	8.5612	1	2756	2756	138	A-B	light	learning	A	B	learning	8	482.447	980.908	415	942	45
21	9	A	16.0819	1	1832	1832	485	A-B	light	learning	A	B	learning	9	1193.1	529.49	1120	485	27
21	10	B	13.0796	1	6812	6812	64	A-B	light	learning	A	B	learning	10	1719.59	105.097	1666	64	57
21	11	A	9.8753	1	1426	1426	197	A-B	light	learning	A	B	learning	11	775.718	905.839	708	883	20
21	12	B	16.156	1	1858	1858	77	A-B	light	learning	A	B	learning	12	300.278	111.103	253	77	49
21	13	A	18.9033	1	1984	1984	184	A-B	light	learning	A	B	learning	13	265.246	410.38	184	373	43
21	14	B	32.5943	1	1496	1496	239	A-B	light	learning	A	B	learning	14	1178.09	290.269	1089	239	8
21	15	B	22.2234	1	1615	1615	328	A-B	light	learning	A	B	learning	15	918.851	362.336	834	328	16
21	16	A	20.5483	1	9786	9786	329	A-B	light	learning	A	B	learning	16	1602.48	381.353	1539	329	51
21	17	B	22.0745	1	2160	2160	140	A-B	light	learning	A	B	learning	17	211.196	439.407	140	387	24
21	18	A	13.3906	1	6680	6680	289	A-B	light	learning	A	B	learning	18	787.729	829.768	714	791	25
21	19	B	19.225	1	3110	3110	477	A-B	light	learning	A	B	learning	19	1490.38	527.488	1422	477	50
21	20	A	24.4651	1	1560	1560	381	A-B	light	learning	A	B	learning	20	1142.06	740.686	1057	699	7
21	21	B	12.7535	1	1591	1591	179	A-B	light	learning	A	B	learning	21	1638.52	217.201	1586	179	42
21	22	B	8.4789	1	4034	4034	198	A-B	light	learning	A	B	learning	22	1251.16	904.838	1188	882	13
21	23	A	17.268	1	3581	3581	286	A-B	light	learning	A	B	learning	23	1580.46	841.779	1522	794	2
21	24	A	24.6989	1	1714	1714	289	A-B	light	learning	A	B	learning	24	1705.58	637.59	1631	585	54
21	25	A	17.5774	1	3349	3349	127	A-B	light	learning	A	B	learning	25	1338.24	1001.93	1274	953	22
21	26	A	9.5386	1	1839	1839	70	A-B	light	learning	A	B	learning	26	1454.35	108.1	1398	70	23
21	27	B	18.8206	1	2934	2934	137	A-B	light	learning	A	B	learning	27	804.745	182.169	729	137	36
21	28	B	4.7864	1	1891	1891	208	A-B	light	learning	A	B	learning	28	1353.25	242.224	1286	208	34
21	29	A	11.0477	1	1767	1767	406	A-B	light	learning	A	B	learning	29	986.914	431.399	933	406	18
21	30	B	7.0178	1	4121	4121	143	A-B	light	learning	A	B	learning	30	1207.12	178.165	1138	143	6
21	31	B	20.8257	1	2071	2071	247	A-B	light	learning	A	B	learning	31	940.871	869.805	858	833	28
21	32	A	31.7156	1	3428	3428	398	A-B	light	learning	A	B	learning	32	631.585	737.683	549	682	21
21	33	A	14.0793	1	3849	3849	177	A-B	light	search	A	B	searchA	1	254.235	859.796	177	829	28
21	34	A	13.6975	1	1869	1869	165	A-B	light	search	A	B	searchA	2	617.572	210.195	553	165	27
21	35	A	15.1206	1	1192	1192	175	A-B	light	search	A	B	searchA	3	1120.04	941.872	1043	905	5
21	36	A	2.4381	1	1245	1245	504	A-B	light	search	A	B	searchA	4	1130.05	534.495	1069	504	21
21	37	A	10.1369	1	2580	2580	367	A-B	light	search	A	B	searchA	5	439.407	736.682	367	701	36
21	38	A	26.0954	1	2968	2968	270	A-B	light	search	A	B	searchA	6	1408.3	856.793	1366	810	41
21	39	A	37.3308	1	1798	1798	211	A-B	light	search	A	B	searchA	7	310.287	662.614	211	622	34
21	40	A	32.3176	1	3082	3082	375	A-B	light	search	A	B	searchA	8	1621.5	718.665	1545	658	43
21	41	A	6.8181	1	6950	6950	151	A-B	light	search	A	B	searchA	9	479.444	966.895	418	929	32
21	42	A	27.9376	1	2565	2565	382	A-B	light	search	A	B	searchA	10	1430.32	426.395	1392	382	38
21	43	A	11.3024	1	1082	1082	400	A-B	light	search	A	B	searchA	11	1296.2	720.667	1227	680	47
21	44	A	20.8992	1	1577	1577	351	A-B	light	search	A	B	searchA	12	433.401	407.377	351	367	52
21	45	A	23.2099	1	3286	3286	78	A-B	light	search	A	B	searchA	13	1443.34	128.119	1394	78	10
21	46	A	27.3844	1	1995	1995	250	A-B	light	search	A	B	searchA	14	492.456	837.776	415	830	1
21	47	A	28.2599	1	1925	1925	269	A-B	light	search	A	B	searchA	15	669.62	867.803	595	811	46
21	48	A	13.8581	1	976	976	478	A-B	light	search	A	B	searchA	16	882.817	646.599	823	602	25
21	49	B	21.5751	1	1858	1858	133	A-B	light	test	A	B	testA-B	1	197.183	426.395	133	373	4
21	50	B	21.9357	1	1692	1692	352	A-B	light	test	A	B	testA-B	2	556.515	364.337	483	352	16
21	51	B	7.4852	1	1499	1499	426	A-B	light	test	A	B	testA-B	3	496.46	680.63	426	652	53
21	52	B	32.2893	1	2007	2007	292	A-B	light	test	A	B	testA-B	4	1705.58	570.528	1628	510	30
21	53	B	14.2973	1	2490	2490	174	A-B	light	test	A	B	testA-B	5	378.35	208.193	301	174	2
21	54	B	9.6218	1	1378	1378	268	A-B	light	test	A	B	testA-B	6	1014.94	303.281	961	268	57
21	55	B	10.7166	1	1327	1327	510	A-B	light	test	A	B	testA-B	7	1170.08	552.512	1109	510	25
21	56	B	30.9792	1	1161	1161	343	A-B	light	test	A	B	testA-B	8	1364.26	794.736	1317	737	26
21	57	B	17.8105	1	1200	1200	283	A-B	light	test	A	B	testA-B	9	349.323	534.495	283	485	47
21	58	B	50.8499	1	1277	1277	483	A-B	light	test	A	B	testA-B	10	1482.37	599.555	1437	520	18
21	59	B	39.1375	1	1094	1094	327	A-B	light	test	A	B	testA-B	11	1379.28	787.729	1355	753	36
21	60	B	7.5949	1	3987	3987	150	A-B	light	test	A	B	testA-B	12	335.31	189.175	273	150	52
21	61	B	35.0948	1	921	921	327	A-B	light	test	A	B	testA-B	13	1076	784.727	978	753	49
21	62	B	22.4181	1	1647	1647	341	A-B	light	test	A	B	testA-B	14	1353.25	390.361	1304	341	48
21	63	B	12.7237	1	2347	2347	317	A-B	light	test	A	B	testA-B	15	369.342	588.545	317	564	42
21	64	B	11.939	1	1321	1321	383	A-B	light	test	A	B	testA-B	16	666.617	410.38	593	383	8
22	1	B	16.2713	1	1970	1970	450	A-B	dark	learning	A	B	learning	1	529.49	515.477	450	481	6
22	2	B	15.0874	1	2248	2248	145	A-B	dark	learning	A	B	learning	2	229.212	973.902	153	935	39
22	3	A	2.7442	1	3108	3108	202	A-B	dark	learning	A	B	learning	3	1502.39	236.219	1438	202	35
22	4	A	13.8343	1	1647	1647	269	A-B	dark	learning	A	B	learning	4	891.826	305.283	816	269	51
22	5	A	5.6606	1	1434	1434	520	A-B	dark	learning	A	B	learning	5	1001.93	593.55	934	560	52
22	6	B	15.5214	1	2865	2865	100	A-B	dark	learning	A	B	learning	6	645.598	116.108	582	100	14
22	7	B	17.8105	1	2386	2386	140	A-B	dark	learning	A	B	learning	7	1042.97	988.916	977	940	1
22	8	A	12.159	1	6525	6525	159	A-B	dark	learning	A	B	learning	8	1500.39	201.186	1431	159	2
22	9	B	3.8452	1	1208	1208	366	A-B	dark	learning	A	B	learning	9	589.546	395.366	529	366	48
22	10	A	10.367	1	1325	1325	397	A-B	dark	learning	A	B	learning	10	1026.95	723.67	960	683	34
22	11	B	19.6079	1	2833	2833	379	A-B	dark	learning	A	B	learning	11	1592.47	431.399	1541	384	23
22	12	A	9.6001	1	1571	1571	386	A-B	dark	learning	A	B	learning	12	1312.21	732.678	1255	694	5
22	13	A	10.5391	1	1399	1399	148	A-B	dark	learning	A	B	learning	13	1675.55	973.902	1612	932	8
22	14	B	11.7898	1	3094	3094	318	A-B	dark	learning	A	B	learning	14	1674.55	666.617	1602	628	40
22	15	B	15.9634	1	1445	1445	223	A-B	dark	learning	A	B	learning	15	415.385	242.224	362	223	30
22	16	A	19.8626	1	2156	2156	138	A-B	dark	learning	A	B	learning	16	544.504	978.906	462	942	56
22	17	A	20.1352	1	1400	1400	325	A-B	dark	learning	A	B	learning	17	473.438	787.729	390	755	41
22	18	A	9.079	1	3422	3422	161	A-B	dark	learning	A	B	learning	18	622.577	949.88	551	919	33
22	19	B	28.023	1	1190	1190	294	A-B	dark	learning	A	B	learning	19	1079	827.766	1042	786	36
22	20	B	33.4432	1	1838	1838	199	A-B	dark	learning	A	B	learning	20	539.5	262.243	465	199	26
22	21	B	15.2738	1	1480	1480	488	A-B	dark	learning	A	B	learning	21	1081	636.589	1011	592	57
22	22	A	8.8054	1	1880	1880	384	A-B	dark	learning	A	B	learning	22	1246.15	419.388	1175	384	17
22	23	B	10.9745	1	1510	1510	384	A-B	dark	learning	A	B	learning	23	960.89	737.683	895	696	15
22	24	A	13.6975	1	1460	1460	403	A-B	dark	learning	A	B	learning	24	1476.37	721.668	1411	677	9
22	25	A	5.2893	1	1849	1849	339	A-B	dark	learning	A	B	learning	25	1649.53	597.553	1581	565	28
22	26	B	11.962	1	3182	3182	194	A-B	dark	learning	A	B	learning	26	245.227	444.411	194	413	18
22	27	A	13.481	1	1322	1322	536	A-B	dark	learning	A	B	learning	27	1207.12	587.544	1149	544	38
22	28	B	6.6205	1	987	987	206	A-B	dark	learning	A	B	learning	28	725.672	244.226	662	206	31
22	29	A	11.082	1	3233	3233	145	A-B	dark	learning	A	B	learning	29	199.184	193.179	145	155	29
22	30	B	12.6905	1	1106	1106	280	A-B	dark	learning	A	B	learning	30	461.427	843.781	400	800	53
22	31	A	25.5529	1	2085	2085	324	A-B	dark	learning	A	B	learning	31	439.407	812.753	376	756	45
22	32	B	9.6001	1	1295	1295	273	A-B	dark	learning	A	B	learning	32	1311.21	845.783	1254	807	20
22	33	A	24.3529	1	2651	2651	212	A-B	dark	search	A	B	searchA	1	1286.19	264.245	1210	212	38
22	34	A	35.2759	1	2597	2597	156	A-B	dark	search	A	B	searchA	2	319.296	222.206	249	156	25
22	35	A	7.3791	1	2206	2206	155	A-B	dark	search	A	B	searchA	3	1318.22	950.88	1260	925	27
22	36	A	11.939	1	1057	1057	379	A-B	dark	search	A	B	searchA	4	1272.18	422.391	1206	379	55
22	37	A	6.1403	1	2626	2626	159	A-B	dark	search	A	B	searchA	5	766.71	187.173	699	159	47
22	38	A	14.8374	1	859	859	376	A-B	dark	search	A	B	searchA	6	814.754	421.39	746	376	17
22	39	A	18.1724	1	1822	1822	131	A-B	dark	search	A	B	searchA	7	1152.07	154.143	1073	131	29
22	40	A	17.8105	1	1636	1636	144	A-B	dark	search	A	B	searchA	8	1271.18	984.912	1205	936	34
22	41	A	8.0801	1	1854	1854	286	A-B	dark	search	A	B	searchA	9	1699.57	712.66	1634	689	36
22	42	A	3.9354	1	1260	1260	538	A-B	dark	search	A	B	searchA	10	1126.04	570.528	1060	542	11
22	43	A	27.3874	1	1764	1764	441	A-B	dark	search	A	B	searchA	11	1480.37	652.604	1396	639	21
22	44	A	8.5098	1	1344	1344	186	A-B	dark	search	A	B	searchA	12	829.768	210.195	763	186	56
22	45	A	15.8421	1	986	986	204	A-B	dark	search	A	B	searchA	13	709.657	251.233	644	204	8
22	46	A	8.1991	1	1120	1120	419	A-B	dark	search	A	B	searchA	14	1019.94	690.639	949	661	4
22	47	A	5.6348	1	1834	1834	421	A-B	dark	search	A	B	searchA	15	555.514	695.644	491	659	28
22	48	A	16.7268	1	1707	1707	332	A-B	dark	search	A	B	searchA	16	1184.1	376.349	1110	332	53
22	49	B	16.0365	1	1531	1531	214	A-B	dark	test	A	B	testA-B	1	1511.4	261.242	1452	214	25
22	50	B	4.039	1	1020	1020	209	A-B	dark	test	A	B	testA-B	2	749.694	237.22	685	209	18
22	51	B	33.593	1	1190	1190	363	A-B	dark	test	A	B	testA-B	3	1606.49	482.447	1557	420	10
22	52	B	13.5242	1	883	883	449	A-B	dark	test	A	B	testA-B	4	1160.07	493.457	1092	449	6
22	53	B	10.1109	1	1450	1450	360	A-B	dark	test	A	B	testA-B	5	919.852	387.359	848	360	15
22	54	B	18.2613	1	1214	1214	354	A-B	dark	test	A	B	testA-B	6	452.419	774.717	384	726	24
22	55	B	3.1915	1	787	787	531	A-B	dark	test	A	B	testA-B	7	1111.03	565.524	1050	531	43
22	56	B	22.913	1	972	972	498	A-B	dark	test	A	B	testA-B	8	565.524	571.529	498	517	56
22	57	B	11.082	1	853	853	505	A-B	dark	test	A	B	testA-B	9	1018.94	543.503	965	505	41
22	58	B	10.592	1	851	851	531	A-B	dark	test	A	B	testA-B	10	1068.99	573.531	1005	531	30
22	59	B	9.8665	1	3326	3326	315	A-B	dark	test	A	B	testA-B	11	373.346	450.417	315	410	46
22	60	B	6.6028	1	1440	1440	229	A-B	dark	test	A	B	testA-B	12	989.917	888.823	928	851	3
22	61	B	10.3299	1	2758	2758	257	A-B	dark	test	A	B	testA-B	13	395.366	861.798	325	823	5
22	62	B	12.0811	1	1238	1238	201	A-B	dark	test	A	B	testA-B	14	483.448	233.216	408	201	1
22	63	B	7.2166	1	899	899	263	A-B	dark	test	A	B	testA-B	15	934.866	301.279	869	263	36
22	64	B	14.1378	1	908	908	483	A-B	dark	test	A	B	testA-B	16	965.894	528.489	899	483	45
23	1	A	5.9053	1	2105	2105	224	A-B	light	learning	A	B	learning	1	602.558	261.242	537	224	50
23	2	B	16.6723	1	2107	2107	405	A-B	light	learning	A	B	learning	2	605.561	722.669	541	675	7
23	3	B	39.58	1	1112	1112	337	A-B	light	learning	A	B	learning	3	1127.04	408.378	1063	337	46
23	4	A	25.6126	1	2651	2651	131	A-B	light	learning	A	B	learning	4	1162.08	186.172	1089	131	54
23	5	B	6.0781	1	3226	3226	173	A-B	light	learning	A	B	learning	5	1673.55	941.872	1615	907	37
23	6	B	11.6186	1	1710	1710	418	A-B	light	learning	A	B	learning	6	878.814	696.645	805	662	48
23	7	A	8.3424	1	1579	1579	117	A-B	light	learning	A	B	learning	7	594.551	151.14	539	117	6
23	8	A	4.9796	1	2465	2465	467	A-B	light	learning	A	B	learning	8	532.493	607.563	467	572	11
23	9	A	19.6963	1	1626	1626	361	A-B	light	learning	A	B	learning	9	1572.46	410.38	1518	361	2
23	10	B	10.7442	1	1798	1798	188	A-B	light	learning	A	B	learning	10	1350.25	932.864	1292	892	53
23	11	B	24.9044	1	1234	1234	369	A-B	light	learning	A	B	learning	11	1066.99	421.39	990	369	32
23	12	A	11.082	1	1521	1521	164	A-B	light	learning	A	B	learning	12	1545.43	953.883	1491	916	4
23	13	B	6.0437	1	1061	1061	284	A-B	light	learning	A	B	learning	13	1070.99	311.288	1004	284	47
23	14	A	18.5766	1	2147	2147	361	A-B	light	learning	A	B	learning	14	425.394	585.542	361	535	28
23	15	B	27.0749	1	1359	1359	92	A-B	light	learning	A	B	learning	15	1489.38	149.138	1435	92	35
23	16	A	33.317	1	1810	1810	251	A-B	light	learning	A	B	learning	16	321.298	343.318	251	279	17
23	17	A	8.5612	1	1159	1159	534	A-B	light	learning	A	B	learning	17	1012.94	573.531	946	534	34
23	18	B	10.9349	1	1772	1772	155	A-B	light	learning	A	B	learning	18	1334.24	960.89	1281	925	13
23	19	B	13.1623	1	1324	1324	247	A-B	light	learning	A	B	learning	19	860.797	270.25	788	247	52
23	20	A	10.592	1	2568	2568	365	A-B	light	learning	A	B	learning	20	1520.41	407.377	1456	365	51
23	21	B	7.7945	1	3696	3696	368	A-B	light	learning	A	B	learning	21	1381.28	746.691	1325	712	22
23	22	B	20.4319	1	2907	2907	414	A-B	light	learning	A	B	learning	22	1395.29	716.664	1338	666	10
23	23	A	25.2897	1	2216	2216	295	A-B	light	learning	A	B	learning	23	364.337	838.777	295	783	29
23	24	A	16.3589	1	2371	2371	173	A-B	light	learning	A	B	learning	24	1427.32	946.877	1378	907	5
23	25	B	22.1951	1	3037	3037	317	A-B	light	learning	A	B	learning	25	1212.12	805.746	1168	763	3
23	26	A	11.54	1	1297	1297	396	A-B	light	learning	A	B	learning	26	1002.93	439.407	940	396	21
23	27	B	14.3805	1	1244	1244	454	A-B	light	learning	A	B	learning	27	1073.99	653.605	1025	626	36
23	28	A	10.4922	1	2537	2537	159	A-B	light	learning	A	B	learning	28	606.562	185.172	553	159	30
23	29	B	15.82	1	1771	1771	306	A-B	light	learning	A	B	learning	29	1245.15	820.76	1185	774	43
23	30	A	23.0092	1	1837	1837	272	A-B	light	learning	A	B	learning	30	1115.03	325.301	1044	272	41
23	31	A	34.9228	1	1141	1141	483	A-B	light	learning	A	B	learning	31	686.636	546.506	639	483	55
23	32	B	22.9854	1	2769	2769	106	A-B	light	learning	A	B	learning	32	1669.55	154.143	1623	106	25
23	33	A	14.1544	1	1134	1134	313	A-B	light	search	A	B	searchA	1	560.519	346.321	483	313	2
23	34	A	26.5749	1	1005	1005	163	A-B	light	search	A	B	searchA	2	853.79	221.205	790	163	48
23	35	A	18.5638	1	2414	2414	310	A-B	light	search	A	B	searchA	3	379.351	502.465	310	453	55
23	36	A	17.666	1	997	997	212	A-B	light	search	A	B	searchA	4	640.593	261.242	576	212	52
23	37	A	14.5812	1	1406	1406	450	A-B	light	search	A	B	searchA	5	741.687	675.626	678	630	33
23	38	A	24.9044	1	1664	1664	346	A-B	light	search	A	B	searchA	6	1514.4	398.369	1437	346	44
23	39	A	25.3906	1	1293	1293	326	A-B	light	search	A	B	searchA	7	674.625	800.741	592	754	14
23	40	A	15.0874	1	1475	1475	315	A-B	light	search	A	B	searchA	8	1620.5	354.328	1544	315	38
23	41	A	31.0157	1	2557	2557	269	A-B	light	search	A	B	searchA	9	356.33	738.684	269	688	43
23	42	A	36.8228	1	1812	1812	400	A-B	light	search	A	B	searchA	10	1561.45	732.678	1520	672	17
23	43	A	12.6232	1	1131	1131	376	A-B	light	search	A	B	searchA	11	964.893	745.691	909	704	13
23	44	A	8.8054	1	1032	1032	515	A-B	light	search	A	B	searchA	12	1024.95	550.51	954	515	5
23	45	A	11.692	1	946	946	474	A-B	light	search	A	B	searchA	13	1173.09	647.6	1105	606	37
23	46	A	15.3988	1	1591	1591	218	A-B	light	search	A	B	searchA	14	931.863	907.841	864	862	39
23	47	A	27.8607	1	1648	1648	237	A-B	light	search	A	B	searchA	15	900.834	275.255	811	237	36
23	48	A	30.5332	1	995	995	381	A-B	light	search	A	B	searchA	16	1363.26	439.407	1285	381	45
23	49	B	18.9613	1	730	730	371	A-B	light	test	A	B	testA-B	1	1378.28	421.39	1319	371	56
23	50	B	29.5364	1	1053	1053	377	A-B	light	test	A	B	testA-B	2	771.715	431.399	690	377	15
23	51	B	21.7288	1	1234	1234	428	A-B	light	test	A	B	testA-B	3	1496.39	480.445	1426	428	6
23	52	B	10.7166	1	2128	2128	156	A-B	light	test	A	B	testA-B	4	1038.96	965.894	978	924	5
23	53	B	14.8613	1	1437	1437	391	A-B	light	test	A	B	testA-B	5	484.449	734.68	418	689	37
23	54	B	17.8376	1	1291	1291	71	A-B	light	test	A	B	testA-B	6	1338.24	108.1	1292	71	42
23	55	B	31.1533	1	1913	1913	446	A-B	light	test	A	B	testA-B	7	1473.36	695.644	1404	634	49
23	56	B	19.6436	1	1637	1637	432	A-B	light	test	A	B	testA-B	8	1549.43	567.525	1488	516	24
23	57	B	32.9329	1	1658	1658	532	A-B	light	test	A	B	testA-B	9	978.906	596.552	921	532	28
23	58	B	4.6743	1	2038	2038	152	A-B	light	test	A	B	testA-B	10	733.679	962.892	668	928	21
23	59	B	13.9023	1	1292	1292	342	A-B	light	test	A	B	testA-B	11	536.497	779.722	464	738	45
23	60	B	5.9053	1	4281	4281	248	A-B	light	test	A	B	testA-B	12	441.409	285.264	376	248	7
23	61	B	6.6028	1	969	969	492	A-B	light	test	A	B	testA-B	13	675.626	530.491	614	492	14
23	62	B	16.4586	1	2418	2418	294	A-B	light	test	A	B	testA-B	14	1064.99	825.765	988	786	57
23	63	B	14.8377	1	804	804	337	A-B	light	test	A	B	testA-B	15	1003.93	383.355	944	337	44
23	64	B	13.6975	1	1321	1321	513	A-B	light	test	A	B	testA-B	16	1472.36	572.53	1407	527	1
24	1	A	16.1805	1	1088	1088	481	A-B	dark	learning	A	B	learning	1	605.561	639.592	529	599	26
24	2	A	13.1531	1	2978	2978	264	A-B	dark	learning	A	B	learning	2	340.315	298.276	264	268	4
24	3	B	18.7973	1	951	951	494	A-B	dark	learning	A	B	learning	3	1014.94	635.588	949	586	39
24	4	B	32.8117	1	1453	1453	341	A-B	dark	learning	A	B	learning	4	1565.45	802.743	1498	739	37
24	5	A	21.4883	1	901	901	416	A-B	dark	learning	A	B	learning	5	648.601	429.398	597	416	56
24	6	A	8.1495	1	1221	1221	390	A-B	dark	learning	A	B	learning	6	818.758	415.385	761	390	16
24	7	B	4.554	1	897	897	287	A-B	dark	learning	A	B	learning	7	872.808	315.292	813	287	5
24	8	B	17.1453	1	2525	2525	235	A-B	dark	learning	A	B	learning	8	652.604	878.814	607	845	48
24	9	A	6.7621	1	1457	1457	400	A-B	dark	learning	A	B	learning	9	1581.46	431.399	1520	406	38
24	10	B	33.7744	1	1676	1676	285	A-B	dark	learning	A	B	learning	10	1729.6	546.506	1635	504	28
24	11	B	16.6993	1	2280	2280	411	A-B	dark	learning	A	B	learning	11	1503.39	710.658	1453	669	44
24	12	A	34.3113	1	3976	3976	218	A-B	dark	learning	A	B	learning	12	258.239	305.283	218	299	40
24	14	B	25.5769	1	3229	3229	351	A-B	dark	learning	A	B	learning	14	441.409	782.725	366	729	12
24	15	A	31.8751	1	1327	1327	201	A-B	dark	learning	A	B	learning	15	598.554	214.198	562	201	6
24	16	B	17.1368	1	8519	8519	332	A-B	dark	learning	A	B	learning	16	1240.15	361.335	1194	332	57
24	17	A	32.4467	1	2087	2087	387	A-B	dark	learning	A	B	learning	17	1564.45	529.49	1533	492	36
24	18	B	7.1638	1	1394	1394	490	A-B	dark	learning	A	B	learning	18	1496.39	608.563	1430	584	18
24	19	B	17.4357	1	2056	2056	171	A-B	dark	learning	A	B	learning	19	1602.48	214.198	1526	171	7
24	20	A	14.3947	1	5095	5095	404	A-B	dark	learning	A	B	learning	20	828.767	710.658	780	676	20
24	21	B	16.8047	1	1630	1630	204	A-B	dark	learning	A	B	learning	21	1379.28	249.231	1326	204	10
24	22	B	15.1586	1	1838	1838	256	A-B	dark	learning	A	B	learning	22	1715.59	721.668	1664	701	31
24	23	A	34.9739	1	5732	5732	168	A-B	dark	learning	A	B	learning	23	320.297	918.851	282	912	17
24	25	A	9.6006	1	1580	1580	214	A-B	dark	learning	A	B	learning	25	529.49	242.224	475	214	13
24	26	B	7.1679	1	5857	5857	235	A-B	dark	learning	A	B	learning	26	295.273	871.807	235	834	24
24	27	A	12.7836	1	1243	1243	341	A-B	dark	learning	A	B	learning	27	392.363	662.614	341	627	52
24	28	B	13.8264	1	882	882	354	A-B	dark	learning	A	B	learning	28	832.771	396.367	779	354	54
24	29	A	8.9745	1	931	931	464	A-B	dark	learning	A	B	learning	29	1225.13	501.464	1155	464	27
24	30	B	33.6168	1	797	797	433	A-B	dark	learning	A	B	learning	30	1527.41	531.492	1487	475	47
24	31	A	14.6038	1	1371	1371	482	A-B	dark	learning	A	B	learning	31	547.507	525.487	493	482	25
24	32	B	3.4225	1	1180	1180	518	A-B	dark	learning	A	B	learning	32	1433.33	594.551	1367	562	11
24	33	A	29.4166	1	2765	2765	367	A-B	dark	search	A	B	searchA	1	462.428	772.716	392	713	47
24	34	A	14.3947	1	948	948	497	A-B	dark	search	A	B	searchA	2	896.83	617.572	848	583	42
24	35	A	27.345	1	1883	1883	193	A-B	dark	search	A	B	searchA	3	229.212	322.298	193	286	17
24	36	A	26.1824	1	1137	1137	154	A-B	dark	search	A	B	searchA	4	521.483	164.152	473	154	6
24	37	A	20.7926	1	1150	1150	133	A-B	dark	search	A	B	searchA	5	177.164	311.288	133	271	28
24	38	A	11.0582	1	1169	1169	417	A-B	dark	search	A	B	searchA	6	1549.43	695.644	1497	663	57
24	39	A	24.2144	1	1327	1327	268	A-B	dark	search	A	B	searchA	7	307.284	457.423	268	429	30
24	40	A	8.2209	1	1153	1153	404	A-B	dark	search	A	B	searchA	8	1032.96	429.398	965	404	35
24	41	A	10.3811	1	1113	1113	137	A-B	dark	search	A	B	searchA	9	862.799	171.159	790	137	9
24	42	A	13.7252	1	6473	6473	200	A-B	dark	search	A	B	searchA	10	420.389	917.85	345	880	52
24	43	A	11.6627	1	5770	5770	214	A-B	dark	search	A	B	searchA	11	1635.51	238.221	1581	214	29
24	44	A	19.9414	1	3488	3488	402	A-B	dark	search	A	B	searchA	12	1251.16	728.675	1192	678	14
24	45	A	12.4161	1	1889	1889	425	A-B	dark	search	A	B	searchA	13	1210.12	466.432	1155	425	10
24	46	A	6.5712	1	1170	1170	311	A-B	dark	search	A	B	searchA	14	1082	345.32	1013	311	4
24	47	A	10.0592	1	2697	2697	302	A-B	dark	search	A	B	searchA	15	1671.55	704.653	1618	675	43
24	48	A	10.5228	1	1787	1787	422	A-B	dark	search	A	B	searchA	16	1072.99	694.643	1019	658	15
24	49	B	15.0993	1	1938	1938	226	A-B	dark	test	A	B	testA-B	1	293.272	478.443	226	432	5
24	50	B	12.5016	1	1122	1122	522	A-B	dark	test	A	B	testA-B	2	912.845	577.535	855	558	54
24	51	B	20.5755	1	2514	2514	130	A-B	dark	test	A	B	testA-B	3	194.18	717.664	130	666	14
24	52	B	8.0366	1	1365	1365	343	A-B	dark	test	A	B	testA-B	4	1098.02	367.34	1038	343	33
24	53	B	14.032	1	5072	5072	170	A-B	dark	test	A	B	testA-B	5	1506.39	939.87	1457	910	37
24	54	B	NA	0	timeout	20000	127	A-B	dark	test	A	B	testA-B	6	NA	NA	1238	953	4
24	55	B	12.4825	1	2983	2983	137	A-B	dark	test	A	B	testA-B	7	746.691	156.145	684	137	8
24	56	B	4.9686	1	1334	1334	226	A-B	dark	test	A	B	testA-B	8	1286.19	257.238	1228	226	24
24	57	B	18.4059	1	3295	3295	288	A-B	dark	test	A	B	testA-B	9	402.373	316.293	321	288	26
24	58	B	16.3285	1	6719	6719	350	A-B	dark	test	A	B	testA-B	10	1285.19	373.346	1236	350	3
24	59	B	20.2703	1	4141	4141	388	A-B	dark	test	A	B	testA-B	11	1575.46	708.656	1532	674	46
24	60	B	11.6419	1	2623	2623	380	A-B	dark	test	A	B	testA-B	12	1072.99	741.687	1015	700	56
24	61	B	13.5745	1	8466	8466	169	A-B	dark	test	A	B	testA-B	13	1275.18	955.885	1213	911	17
24	62	B	19.6793	1	1785	1785	212	A-B	dark	test	A	B	testA-B	14	1644.52	259.24	1569	212	38
24	63	B	24.5545	1	1686	1686	311	A-B	dark	test	A	B	testA-B	15	474.439	823.763	418	769	11
24	64	B	6.6205	1	2023	2023	210	A-B	dark	test	A	B	testA-B	16	1631.51	907.841	1567	870	51
25	1	A	NA	0	timeout	20000	359	A-B	light	learning	A	B	learning	1	NA	NA	359	661	51
25	2	A	20.8517	1	6162	6162	334	A-B	light	learning	A	B	learning	2	1204.94	797.686	1147	746	13
25	3	B	5.9294	1	4850	4850	189	A-B	light	learning	A	B	learning	3	254.683	424.071	189	398	17
25	4	B	26.0056	1	7180	7180	217	A-B	light	learning	A	B	learning	4	1212.15	902.202	1124	863	52
25	5	B	10.2192	1	1472	1472	398	A-B	light	learning	A	B	learning	5	1057.17	723.204	998	682	18
25	6	A	17.0619	1	1388	1388	496	A-B	light	learning	A	B	learning	6	1370.72	544.205	1312	496	49
25	7	A	23.1664	1	1445	1445	350	A-B	light	learning	A	B	learning	7	1615.8	493.749	1570	447	31
25	8	B	8.2733	1	10441	10441	244	A-B	light	learning	A	B	learning	8	935.84	862.558	879	836	11
25	9	A	22.615	1	5063	5063	130	A-B	light	learning	A	B	learning	9	279.911	986.296	239	950	5
25	10	B	34.8103	1	3810	3810	137	A-B	light	learning	A	B	learning	10	794.082	197.019	711	137	27
25	11	A	9.0594	1	1791	1791	82	A-B	light	learning	A	B	learning	11	534.594	111.724	481	82	42
25	12	B	8.7005	1	5105	5105	396	A-B	light	learning	A	B	learning	12	1580.96	592.258	1524	555	26
25	13	B	29.8045	1	2185	2185	142	A-B	light	learning	A	B	learning	13	233.059	599.466	142	559	12
25	14	A	23.5078	1	2840	2840	398	A-B	light	learning	A	B	learning	14	1561.74	617.486	1522	589	21
25	15	A	27.5711	1	5876	5876	189	A-B	light	learning	A	B	learning	15	864.961	940.645	781	891	36
25	16	B	25.8045	1	1022	1022	469	A-B	light	learning	A	B	learning	16	970.678	667.942	914	611	6
25	17	A	24.5004	1	2959	2959	352	A-B	light	learning	A	B	learning	17	955.061	390.434	869	352	30
25	18	A	20.6846	1	2917	2917	202	A-B	light	learning	A	B	learning	18	1027.14	923.827	949	878	9
25	19	B	18.58	1	6574	6574	447	A-B	light	learning	A	B	learning	19	1265.01	472.125	1185	447	41
25	20	B	10.0704	1	5479	5479	193	A-B	light	learning	A	B	learning	20	264.294	646.318	193	621	8
25	21	B	14.274	1	5002	5002	156	A-B	light	learning	A	B	learning	21	1326.27	201.824	1261	156	53
25	22	A	37.4705	1	6459	6459	274	A-B	light	learning	A	B	learning	22	582.647	336.374	499	274	14
25	23	A	26.2694	1	3745	3745	256	A-B	light	learning	A	B	learning	23	1227.76	867.364	1141	824	22
25	24	B	13.0301	1	3225	3225	251	A-B	light	learning	A	B	learning	24	1000.71	291.924	929	251	2
25	25	B	12.4544	1	4654	4654	125	A-B	light	learning	A	B	learning	25	1110.03	168.187	1051	125	57
25	26	B	26.2694	1	5759	5759	141	A-B	light	learning	A	B	learning	26	227.052	629.499	141	586	46
25	27	A	5.3583	1	2866	2866	402	A-B	light	learning	A	B	learning	27	945.451	428.877	884	402	3
25	28	A	10.3641	1	1615	1615	298	A-B	light	learning	A	B	learning	28	1343.09	331.568	1290	298	23
25	29	B	NA	0	timeout	20000	238	A-B	light	learning	A	B	learning	29	NA	NA	1450	238	10
25	30	A	18.58	1	1778	1778	396	A-B	light	learning	A	B	learning	30	476.93	482.937	396	458	37
25	31	A	24.1444	1	2477	2477	287	A-B	light	learning	A	B	learning	31	371.212	541.802	287	499	33
25	32	B	25.6997	1	1910	1910	249	A-B	light	learning	A	B	learning	32	725.606	265.495	642	249	16
25	33	A	26.2694	1	1868	1868	189	A-B	light	search	A	B	searchA	1	1308.25	231.858	1222	189	3
25	34	A	26.2937	1	3153	3153	305	A-B	light	search	A	B	searchA	2	394.038	505.762	305	470	33
25	35	A	12.9667	1	3966	3966	371	A-B	light	search	A	B	searchA	3	1612.19	744.828	1549	700	6
25	36	A	21.2014	1	1295	1295	531	A-B	light	search	A	B	searchA	4	785.673	564.627	702	531	48
25	37	A	14.3232	1	1184	1184	383	A-B	light	search	A	B	searchA	5	1221.76	403.649	1150	383	46
25	38	A	10.5601	1	8663	8663	444	A-B	light	search	A	B	searchA	6	1275.82	677.553	1213	636	32
25	39	A	33.4276	1	2229	2229	452	A-B	light	search	A	B	searchA	7	1124.45	691.969	1052	628	13
25	40	A	14.5696	1	3524	3524	67	A-B	light	search	A	B	searchA	8	1108.83	111.724	1039	67	21
25	41	A	24.9672	1	2408	2408	496	A-B	light	search	A	B	searchA	9	1018.73	544.205	937	496	14
25	42	A	13.084	1	3099	3099	446	A-B	light	search	A	B	searchA	10	551.413	659.533	477	634	19
25	43	A	24.9987	1	1552	1552	253	A-B	light	search	A	B	searchA	11	959.866	281.112	872	253	45
25	44	A	35.7459	1	2569	2569	484	A-B	light	search	A	B	searchA	12	1060.78	550.211	989	484	28
25	45	A	23.8161	1	1473	1473	308	A-B	light	search	A	B	searchA	13	722.002	359.199	646	308	24
25	46	A	14.4599	1	11840	11840	225	A-B	light	search	A	B	searchA	14	1291.43	893.793	1216	855	29
25	47	A	NA	0	timeout	20000	149	A-B	light	search	A	B	searchA	15	NA	NA	1378	931	17
25	48	A	42.0875	1	19591	19591	175	A-B	light	search	A	B	searchA	16	385.628	962.269	356	905	22
25	49	B	12.4828	1	1325	1325	455	A-B	light	test	A	B	testA-B	1	819.31	666.741	750	625	38
25	50	B	21.9281	1	11635	11635	293	A-B	light	test	A	B	testA-B	2	1474.04	803.693	1395	787	12
25	51	B	NA	0	timeout	20000	383	A-B	light	test	A	B	testA-B	3	NA	NA	1537	584	40
25	52	B	23.9418	1	4209	4209	447	A-B	light	test	A	B	testA-B	4	1000.71	502.158	941	447	46
25	53	B	28.4386	1	4130	4130	515	A-B	light	test	A	B	testA-B	5	1401.96	574.238	1347	515	10
25	54	B	21.1395	1	13178	13178	396	A-B	light	test	A	B	testA-B	6	1547.32	418.065	1466	396	45
25	55	B	NA	0	timeout	20000	279	A-B	light	test	A	B	testA-B	7	NA	NA	1534	801	20
25	56	B	NA	0	timeout	20000	235	A-B	light	test	A	B	testA-B	8	NA	NA	526	845	5
25	57	B	13.7906	1	5701	5701	366	A-B	light	test	A	B	testA-B	9	1586.96	754.438	1534	714	4
25	58	B	3.0848	1	1950	1950	507	A-B	light	test	A	B	testA-B	10	872.169	604.271	806	573	18
25	59	B	20.6057	1	2610	2610	148	A-B	light	test	A	B	testA-B	11	1237.37	170.589	1156	148	16
25	60	B	50.0933	1	9501	9501	172	A-B	light	test	A	B	testA-B	12	705.183	965.873	599	908	6
25	61	B	30.3061	1	5854	5854	129	A-B	light	test	A	B	testA-B	13	333.971	952.659	270	951	56
25	62	B	4.283	1	5348	5348	336	A-B	light	test	A	B	testA-B	14	1413.97	774.861	1347	744	9
25	63	B	20.5282	1	12663	12663	268	A-B	light	test	A	B	testA-B	15	1734.73	789.277	1652	763	52
25	64	B	NA	0	timeout	20000	189	A-B	light	test	A	B	testA-B	16	NA	NA	189	636	13
26	1	B	39.0387	1	6405	6405	413	A-B	dark	learning	A	B	learning	1	979.907	483.448	911	413	35
26	3	A	17.6208	1	5541	5541	133	A-B	dark	learning	A	B	learning	3	1208.12	994.921	1139	947	18
26	4	B	23.2987	1	1187	1187	396	A-B	dark	learning	A	B	learning	4	1185.1	441.409	1141	396	47
26	5	A	26.5749	1	3910	3910	532	A-B	dark	learning	A	B	learning	5	637.59	590.547	574	532	27
26	6	B	4.5732	1	2230	2230	280	A-B	dark	learning	A	B	learning	6	711.659	826.765	650	800	9
26	7	B	28.6467	1	2403	2403	333	A-B	dark	learning	A	B	learning	7	1421.32	798.74	1378	747	22
26	8	A	2.0143	1	884	884	420	A-B	dark	learning	A	B	learning	8	1191.1	452.419	1130	420	26
26	9	A	3.4225	1	5515	5515	145	A-B	dark	learning	A	B	learning	9	404.374	178.165	338	145	36
26	10	B	17.2121	1	1319	1319	277	A-B	dark	learning	A	B	learning	10	335.31	299.277	277	284	41
26	11	B	13.2249	1	2898	2898	333	A-B	dark	learning	A	B	learning	11	1658.54	730.677	1587	710	40
26	12	A	22.9732	1	3924	3924	225	A-B	dark	learning	A	B	learning	12	1671.55	276.256	1596	225	14
26	13	A	24.0972	1	1735	1735	179	A-B	dark	learning	A	B	learning	13	930.862	213.197	892	179	56
26	14	A	25.8066	1	1122	1122	80	A-B	dark	learning	A	B	learning	14	292.271	136.126	237	80	50
26	15	B	27.1266	1	1525	1525	232	A-B	dark	learning	A	B	learning	15	586.543	265.246	496	232	30
26	16	B	8.7555	1	3116	3116	427	A-B	dark	learning	A	B	learning	16	622.577	692.641	562	653	1
26	17	A	18.5259	1	3088	3088	360	A-B	dark	learning	A	B	learning	17	417.387	645.598	360	597	8
26	18	B	49.4895	1	3097	3097	152	A-B	dark	learning	A	B	learning	18	1661.54	974.903	1646	928	34
26	19	B	5.8106	1	3987	3987	248	A-B	dark	learning	A	B	learning	19	1061.98	274.254	1001	248	32
26	20	A	10.8863	1	2591	2591	324	A-B	dark	learning	A	B	learning	20	384.356	584.541	324	564	42
26	21	A	7.7827	1	2469	2469	161	A-B	dark	learning	A	B	learning	21	1428.32	200.185	1367	161	11
26	22	B	11.3544	1	7476	7476	224	A-B	dark	learning	A	B	learning	22	549.509	889.824	475	856	46
26	23	B	21.6645	1	9180	9180	167	A-B	dark	learning	A	B	learning	23	1106.02	930.862	1060	913	3
26	24	A	2.4738	1	1344	1344	386	A-B	dark	learning	A	B	learning	24	880.816	419.388	820	386	44
26	25	A	21.548	1	1046	1046	305	A-B	dark	learning	A	B	learning	25	1194.11	318.295	1120	305	21
26	26	A	18.5766	1	3025	3025	299	A-B	dark	learning	A	B	learning	26	363.336	808.749	299	759	48
26	27	B	26.5805	1	1831	1831	282	A-B	dark	learning	A	B	learning	27	1718.59	668.619	1638	657	19
26	28	B	3.4745	1	3177	3177	152	A-B	dark	learning	A	B	learning	28	289.268	180.167	226	152	45
26	29	A	17.1917	1	1711	1711	327	A-B	dark	learning	A	B	learning	29	686.636	350.324	639	327	54
26	30	B	19.9077	1	1474	1474	379	A-B	dark	learning	A	B	learning	30	1145.06	391.362	1078	379	57
26	31	A	6.9641	1	943	943	453	A-B	dark	learning	A	B	learning	31	956.886	484.449	901	453	33
26	32	B	25.5702	1	1368	1368	468	A-B	dark	learning	A	B	learning	32	1104.02	668.619	1042	612	23
26	33	A	8.9386	1	1641	1641	236	A-B	dark	search	A	B	searchA	1	314.291	869.805	244	844	55
26	34	A	23.0291	1	2777	2777	71	A-B	dark	search	A	B	searchA	2	262.243	112.104	220	71	51
26	35	A	11.2406	1	1077	1077	473	A-B	dark	search	A	B	searchA	3	1429.32	507.47	1377	473	11
26	36	A	7.7262	1	1236	1236	196	A-B	dark	search	A	B	searchA	4	294.272	220.204	233	196	15
26	37	A	19.4529	1	867	867	507	A-B	dark	search	A	B	searchA	5	1282.19	531.492	1237	507	53
26	38	A	19.8464	1	3257	3257	279	A-B	dark	search	A	B	searchA	6	951.881	826.765	870	801	30
26	39	A	8.1239	1	2272	2272	319	A-B	dark	search	A	B	searchA	7	1658.54	574.532	1601	537	52
26	40	A	6.7966	1	1093	1093	446	A-B	dark	search	A	B	searchA	8	1087.01	471.437	1022	446	50
26	41	A	34.7276	1	4038	4038	166	A-B	dark	search	A	B	searchA	9	225.208	666.617	166	670	10
26	42	A	16.3285	1	879	879	380	A-B	dark	search	A	B	searchA	10	1254.16	403.373	1205	380	21
26	43	A	8.267	1	3348	3348	175	A-B	dark	search	A	B	searchA	11	1331.23	942.873	1263	905	14
26	44	A	4.9796	1	1393	1393	438	A-B	dark	search	A	B	searchA	12	1045.97	677.627	981	642	12
26	45	A	19.4802	1	1282	1282	289	A-B	dark	search	A	B	searchA	13	1057.98	809.75	1010	791	18
26	46	A	18.9666	1	3772	3772	227	A-B	dark	search	A	B	searchA	14	618.573	259.24	575	227	4
26	47	A	8.0909	1	1150	1150	95	A-B	dark	search	A	B	searchA	15	1464.36	134.124	1404	95	34
26	48	A	13.5162	1	2266	2266	155	A-B	dark	search	A	B	searchA	16	1034.96	942.873	973	925	5
26	49	B	11.6648	1	4375	4375	326	A-B	dark	test	A	B	testA-B	1	1649.53	642.595	1594	603	4
26	50	B	13.0732	1	2659	2659	295	A-B	dark	test	A	B	testA-B	2	1677.55	619.574	1625	597	39
26	51	B	18.5766	1	3067	3067	89	A-B	dark	test	A	B	testA-B	3	224.208	139.129	160	89	46
26	52	B	11.2532	1	7679	7679	456	A-B	dark	test	A	B	testA-B	4	1228.14	478.443	1159	456	38
26	53	B	19.1946	1	2097	2097	287	A-B	dark	test	A	B	testA-B	5	453.42	337.312	395	287	6
26	54	B	23.2883	1	7154	7154	276	A-B	dark	test	A	B	testA-B	6	409.379	814.754	335	804	27
26	55	B	10.367	1	9199	9199	143	A-B	dark	test	A	B	testA-B	7	361.335	965.894	288	937	57
26	56	B	51.1071	1	2878	2878	312	A-B	dark	test	A	B	testA-B	8	1620.5	564.523	1608	536	43
26	57	B	14.8042	1	2159	2159	199	A-B	dark	test	A	B	testA-B	9	933.865	897.831	868	881	32
26	58	B	24.9232	1	1247	1247	429	A-B	dark	test	A	B	testA-B	10	957.887	668.619	916	651	50
26	59	B	4.4754	1	5703	5703	217	A-B	dark	test	A	B	testA-B	11	495.459	889.824	432	863	41
26	60	B	19.9657	1	1572	1572	517	A-B	dark	test	A	B	testA-B	12	789.731	593.55	747	563	47
26	61	B	6.2688	1	2195	2195	162	A-B	dark	test	A	B	testA-B	13	1677.55	199.184	1617	162	8
26	62	B	23.233	1	1395	1395	417	A-B	dark	test	A	B	testA-B	14	497.461	428.397	445	417	3
26	63	B	26.8723	1	1000	1000	409	A-B	dark	test	A	B	testA-B	15	1082	425.394	1041	409	36
26	64	B	15.4069	1	1504	1504	306	A-B	dark	test	A	B	testA-B	16	736.682	817.757	683	774	35
27	1	A	NA	0	timeout	20000	150	A-B	light	learning	A	B	learning	1	NA	NA	653	930	23
27	2	A	16.7268	1	17786	17786	234	A-B	light	learning	A	B	learning	2	1645.52	889.824	1571	846	37
27	3	B	4.6303	1	2518	2518	209	A-B	light	learning	A	B	learning	3	522.484	237.22	456	209	56
27	4	B	14.4572	1	3304	3304	499	A-B	light	learning	A	B	learning	4	1275.18	625.579	1207	581	6
27	5	A	20.1781	1	2076	2076	419	A-B	light	learning	A	B	learning	5	1556.44	527.488	1501	477	21
27	6	B	18.2293	1	3729	3729	248	A-B	light	learning	A	B	learning	6	825.765	297.275	768	248	28
27	7	A	24.5036	1	1518	1518	248	A-B	light	learning	A	B	learning	7	940.871	296.274	860	248	31
27	8	B	20.1644	1	7447	7447	431	A-B	light	learning	A	B	learning	8	513.475	557.516	431	519	39
27	9	B	16.0819	1	1500	1500	425	A-B	light	learning	A	B	learning	9	732.678	469.435	660	425	5
27	10	A	25.5482	1	1416	1416	319	A-B	light	learning	A	B	learning	10	901.835	375.348	832	319	15
27	11	B	25.236	1	7084	7084	304	A-B	light	learning	A	B	learning	11	1643.52	359.333	1571	304	57
27	12	A	11.5074	1	1965	1965	476	A-B	light	learning	A	B	learning	12	939.87	638.591	888	604	4
27	13	A	9.2525	1	1419	1419	476	A-B	light	learning	A	B	learning	13	1271.18	639.592	1200	604	30
27	14	B	3.883	1	6281	6281	396	A-B	light	learning	A	B	learning	14	642.595	430.399	583	396	40
27	15	A	27.7517	1	1265	1265	269	A-B	light	learning	A	B	learning	15	1108.03	327.303	1037	269	50
27	16	B	18.0234	1	6379	6379	181	A-B	light	learning	A	B	learning	16	1647.53	931.863	1602	899	20
27	17	A	5.3451	1	3269	3269	188	A-B	light	learning	A	B	learning	17	1699.57	919.852	1633	892	24
27	18	A	10.0816	1	1408	1408	376	A-B	light	learning	A	B	learning	18	880.816	408.378	808	376	35
27	19	B	38.6427	1	5135	5135	125	A-B	light	learning	A	B	learning	19	412.382	194.18	340	125	42
27	20	B	38.3387	1	5085	5085	538	A-B	light	learning	A	B	learning	20	646.599	532.493	592	538	13
27	21	A	3.4225	1	3358	3358	160	A-B	light	learning	A	B	learning	21	619.574	952.882	554	920	49
27	22	A	11.939	1	3397	3397	106	A-B	light	learning	A	B	learning	22	749.694	149.138	684	106	9
27	23	B	21.4447	1	2751	2751	272	A-B	light	learning	A	B	learning	23	688.638	315.292	608	272	10
27	24	B	22.7415	1	1119	1119	415	A-B	light	learning	A	B	learning	24	641.594	469.435	582	415	52
27	25	B	12.6017	1	3341	3341	151	A-B	light	learning	A	B	learning	25	806.747	971.9	739	929	27
27	26	A	43.5824	1	3849	3849	355	A-B	light	learning	A	B	learning	26	973.902	799.74	910	725	19
27	27	A	14.9905	1	1876	1876	182	A-B	light	learning	A	B	learning	27	1208.12	208.193	1159	182	32
27	28	B	11.7024	1	1547	1547	305	A-B	light	learning	A	B	learning	28	1267.17	817.757	1206	775	55
27	29	B	12.1662	1	1690	1690	254	A-B	light	learning	A	B	learning	29	795.737	858.795	721	826	45
27	30	B	20.2287	1	2502	2502	139	A-B	light	learning	A	B	learning	30	258.239	188.174	185	139	22
27	31	A	18.4059	1	1450	1450	503	A-B	light	learning	A	B	learning	31	593.55	531.492	512	503	33
27	32	A	7.4579	1	1524	1524	258	A-B	light	learning	A	B	learning	32	1582.47	284.263	1514	258	1
27	33	A	26.5665	1	1442	1442	171	A-B	light	search	A	B	searchA	1	906.84	913.846	846	909	28
27	34	A	18.0734	1	1586	1586	187	A-B	light	search	A	B	searchA	2	1376.27	911.844	1300	893	39
27	35	A	4.6877	1	1423	1423	423	A-B	light	search	A	B	searchA	3	1293.2	690.639	1234	657	53
27	36	A	28.4474	1	1538	1538	428	A-B	light	search	A	B	searchA	4	1539.43	545.505	1492	490	14
27	37	A	37.2605	1	1924	1924	236	A-B	light	search	A	B	searchA	5	393.364	902.836	305	844	11
27	38	A	26.4918	1	1612	1612	333	A-B	light	search	A	B	searchA	6	423.392	802.743	370	747	31
27	39	A	32.6173	1	2118	2118	177	A-B	light	search	A	B	searchA	7	1520.41	241.223	1459	177	3
27	40	A	15.199	1	2070	2070	150	A-B	light	search	A	B	searchA	8	1044.97	971.9	993	930	13
27	41	A	5.2727	1	2033	2033	260	A-B	light	search	A	B	searchA	9	625.579	849.787	558	820	37
27	42	A	11.9096	1	821	821	352	A-B	light	search	A	B	searchA	10	983.911	770.714	924	728	57
27	43	A	12.5745	1	813	813	355	A-B	light	search	A	B	searchA	11	1120.04	745.691	1064	725	22
27	44	A	46.7956	1	2594	2594	106	A-B	light	search	A	B	searchA	12	1053.98	181.168	974	106	1
27	45	A	28.446	1	3663	3663	129	A-B	light	search	A	B	searchA	13	1732.6	188.174	1663	129	17
27	46	A	5.5564	1	1143	1143	530	A-B	light	search	A	B	searchA	14	984.912	556.515	923	530	41
27	47	A	3.6879	1	1466	1466	455	A-B	light	search	A	B	searchA	15	1529.42	576.534	1465	542	12
27	48	A	7.7564	1	3064	3064	197	A-B	light	search	A	B	searchA	16	1636.52	906.84	1571	883	40
27	49	B	35.5621	1	1479	1479	219	A-B	light	test	A	B	testA-B	1	1615.5	286.265	1552	219	14
27	50	B	17.5707	1	2824	2824	403	A-B	light	test	A	B	testA-B	2	1440.33	452.419	1378	403	9
27	51	B	32.7975	1	2198	2198	119	A-B	light	test	A	B	testA-B	3	1629.51	183.17	1570	119	46
27	52	B	46.3161	1	7371	7371	404	A-B	light	test	A	B	testA-B	4	1165.08	712.66	1148	676	3
27	53	B	8.9624	1	9340	9340	309	A-B	light	test	A	B	testA-B	5	1005.93	801.742	952	771	48
27	54	B	28.9926	1	1413	1413	379	A-B	light	test	A	B	testA-B	6	915.848	425.394	828	379	47
27	55	B	28.5712	1	2340	2340	484	A-B	light	test	A	B	testA-B	7	546.506	650.602	484	591	57
27	56	B	25.5748	1	1266	1266	344	A-B	light	test	A	B	testA-B	8	922.855	401.372	859	344	40
27	57	B	30.6737	1	3490	3490	312	A-B	light	test	A	B	testA-B	9	1641.52	798.74	1608	761	31
27	58	B	34.6103	1	4801	4801	367	A-B	light	test	A	B	testA-B	10	516.478	420.389	426	367	12
27	59	B	16.6582	1	1602	1602	385	A-B	light	test	A	B	testA-B	11	1059.98	742.688	999	695	21
27	60	B	38.6898	1	17993	17993	414	A-B	light	test	A	B	testA-B	12	1180.09	713.661	1152	666	51
27	61	B	26.8137	1	3023	3023	451	A-B	light	test	A	B	testA-B	13	1350.25	681.631	1303	629	16
27	62	B	40.9488	1	3305	3305	264	A-B	light	test	A	B	testA-B	14	1696.57	500.463	1656	434	20
27	63	B	24.5265	1	6494	6494	131	A-B	light	test	A	B	testA-B	15	655.607	175.162	572	131	42
27	64	B	23.3938	1	3358	3358	65	A-B	light	test	A	B	testA-B	16	211.196	110.102	129	65	6
28	1	A	12.5409	1	1881	1881	245	A-B	dark	learning	A	B	learning	1	978.906	878.814	916	835	30
28	2	B	25.2897	1	3232	3232	197	A-B	dark	learning	A	B	learning	2	337.312	253.234	268	197	26
28	3	A	6.141	1	2207	2207	64	A-B	dark	learning	A	B	learning	3	1186.1	97.0899	1129	64	23
28	4	B	27.8009	1	1817	1817	214	A-B	dark	learning	A	B	learning	4	1576.46	922.855	1524	866	47
28	5	A	17.1375	1	926	926	226	A-B	dark	learning	A	B	learning	5	861.798	272.252	790	226	48
28	6	B	15.3988	1	1483	1483	308	A-B	dark	learning	A	B	learning	6	376.349	471.437	308	425	17
28	7	B	6.2401	1	1457	1457	328	A-B	dark	learning	A	B	learning	7	1055.98	781.724	987	752	46
28	8	A	25.0117	1	3256	3256	332	A-B	dark	learning	A	B	learning	8	1273.18	365.338	1235	332	18
28	9	B	31.0481	1	4379	4379	401	A-B	dark	learning	A	B	learning	9	1473.36	696.645	1438	679	25
28	10	A	11.6419	1	928	928	409	A-B	dark	learning	A	B	learning	10	824.764	451.418	767	409	11
28	11	A	20.7132	1	1951	1951	396	A-B	dark	learning	A	B	learning	11	1567.45	568.526	1524	531	31
28	12	B	5.9658	1	3228	3228	104	A-B	dark	learning	A	B	learning	12	1634.51	131.121	1575	104	28
28	13	A	13.9646	1	1319	1319	385	A-B	dark	learning	A	B	learning	13	434.402	567.525	385	535	39
28	14	A	29.6077	1	2366	2366	269	A-B	dark	learning	A	B	learning	14	1405.3	326.302	1357	269	54
28	15	B	3.1915	1	1075	1075	436	A-B	dark	learning	A	B	learning	15	894.828	470.436	834	436	1
28	16	B	8.9754	1	1589	1589	280	A-B	dark	learning	A	B	learning	16	613.568	822.762	554	800	51
28	17	B	3.656	1	896	896	410	A-B	dark	learning	A	B	learning	17	1124.04	445.412	1062	410	56
28	18	A	11.939	1	1330	1330	449	A-B	dark	learning	A	B	learning	18	528.489	492.456	462	449	8
28	19	B	15.4853	1	2962	2962	222	A-B	dark	learning	A	B	learning	19	1418.31	238.221	1355	222	49
28	20	A	8.6986	1	2237	2237	331	A-B	dark	learning	A	B	learning	20	1356.26	366.339	1301	331	38
28	21	B	10.2536	1	941	941	120	A-B	dark	learning	A	B	learning	21	1592.47	149.138	1539	120	35
28	22	A	16.9656	1	4536	4536	147	A-B	dark	learning	A	B	learning	22	1686.56	964.893	1641	933	40
28	23	A	17.9442	1	1457	1457	432	A-B	dark	learning	A	B	learning	23	556.515	695.644	500	648	3
28	24	B	30.9159	1	1351	1351	273	A-B	dark	learning	A	B	learning	24	345.32	528.489	273	467	22
28	25	B	15.82	1	4369	4369	144	A-B	dark	learning	A	B	learning	25	953.883	982.91	894	936	36
28	26	A	18.6604	1	964	964	83	A-B	dark	learning	A	B	learning	26	1309.21	133.123	1244	83	10
28	27	B	4.0965	1	1172	1172	269	A-B	dark	learning	A	B	learning	27	901.835	842.78	835	811	15
28	28	A	10.7384	1	1231	1231	328	A-B	dark	learning	A	B	learning	28	985.913	793.735	921	752	57
28	29	B	24.3598	1	7923	7923	177	A-B	dark	learning	A	B	learning	29	218.202	734.68	177	693	7
28	30	A	12.5482	1	1223	1223	360	A-B	dark	learning	A	B	learning	30	561.52	739.685	493	720	4
28	31	A	4.6564	1	2572	2572	345	A-B	dark	learning	A	B	learning	31	1634.51	450.417	1575	421	9
28	32	B	5.9658	1	1959	1959	206	A-B	dark	learning	A	B	learning	32	860.797	904.838	804	874	42
28	33	A	21.3354	1	894	894	351	A-B	dark	search	A	B	searchA	1	1612.49	673.624	1569	635	14
28	34	A	13.9299	1	1792	1792	81	A-B	dark	search	A	B	searchA	2	1045.97	125.116	977	81	34
28	35	A	23.5728	1	3236	3236	193	A-B	dark	search	A	B	searchA	3	1427.32	201.186	1366	193	43
28	36	A	33.7282	1	1345	1345	359	A-B	dark	search	A	B	searchA	4	817.757	774.717	730	721	47
28	37	A	21.4947	1	1264	1264	377	A-B	dark	search	A	B	searchA	5	467.433	389.361	395	377	18
28	38	A	33.1126	1	800	800	219	A-B	dark	search	A	B	searchA	6	1537.42	271.251	1500	219	57
28	39	A	6.9683	1	5587	5587	181	A-B	dark	search	A	B	searchA	7	1127.04	930.862	1071	899	5
28	40	A	6.6701	1	3233	3233	167	A-B	dark	search	A	B	searchA	8	1665.54	939.87	1607	913	42
28	41	A	27.8525	1	1177	1177	346	A-B	dark	search	A	B	searchA	9	667.618	405.375	601	346	49
28	42	A	11.7024	1	1924	1924	302	A-B	dark	search	A	B	searchA	10	790.732	820.76	730	778	4
28	43	A	6.2401	1	4482	4482	149	A-B	dark	search	A	B	searchA	11	396.367	960.89	327	931	44
28	44	A	17.0263	1	1515	1515	435	A-B	dark	search	A	B	searchA	12	1404.3	677.627	1358	645	36
28	45	A	24.8563	1	3056	3056	127	A-B	dark	search	A	B	searchA	13	1379.28	1007.93	1324	953	50
28	46	A	25.0928	1	1356	1356	474	A-B	dark	search	A	B	searchA	14	1235.14	508.471	1197	474	6
28	47	A	20.9668	1	1419	1419	484	A-B	dark	search	A	B	searchA	15	561.52	542.502	484	495	41
28	48	A	45.4711	1	1465	1465	384	A-B	dark	search	A	B	searchA	16	1555.44	570.528	1536	527	52
28	49	B	37.2179	1	922	922	515	A-B	dark	test	A	B	testA-B	1	1363.26	556.515	1336	515	41
28	50	B	16.6297	1	2732	2732	234	A-B	dark	test	A	B	testA-B	2	1442.34	891.826	1371	846	38
28	51	B	22.644	1	4618	4618	263	A-B	dark	test	A	B	testA-B	3	804.745	317.294	740	263	54
28	52	B	25.5769	1	1278	1278	517	A-B	dark	test	A	B	testA-B	4	1366.27	616.571	1291	563	28
28	53	B	4.0893	1	939	939	346	A-B	dark	test	A	B	testA-B	5	691.64	381.353	627	346	37
28	54	B	17.1375	1	1170	1170	369	A-B	dark	test	A	B	testA-B	6	1529.42	740.686	1449	711	14
28	55	B	7.5712	1	996	996	361	A-B	dark	test	A	B	testA-B	7	924.856	397.368	856	361	48
28	56	B	21.2566	1	17499	17499	483	A-B	dark	test	A	B	testA-B	8	1479.37	550.51	1437	515	33
28	57	B	10.2075	1	5640	5640	352	A-B	dark	test	A	B	testA-B	9	444.411	751.696	388	728	35
28	58	B	3.2919	1	852	852	318	A-B	dark	test	A	B	testA-B	10	1137.05	348.322	1077	318	56
28	59	B	3.1454	1	1586	1586	453	A-B	dark	test	A	B	testA-B	11	1206.12	482.447	1145	453	36
28	60	B	2.1272	1	1501	1501	253	A-B	dark	test	A	B	testA-B	12	1731.6	417.387	1667	385	52
28	61	B	17.5809	1	851	851	223	A-B	dark	test	A	B	testA-B	13	1572.46	271.251	1515	223	25
28	62	B	30.7684	1	2471	2471	375	A-B	dark	test	A	B	testA-B	14	1586.47	564.523	1545	511	47
28	63	B	9.734	1	1021	1021	116	A-B	dark	test	A	B	testA-B	15	1591.47	157.145	1530	116	57
28	64	B	13.9428	1	1024	1024	424	A-B	dark	test	A	B	testA-B	16	620.575	678.628	547	656	4
29	1	A	20.1308	1	2775	2775	389	A-B	light	learning	A	B	learning	1	472.437	636.589	389	607	12
29	2	B	33.6165	1	1047	1047	296	A-B	light	learning	A	B	learning	2	1296.2	361.335	1235	296	26
29	3	B	34.1795	1	1392	1392	223	A-B	light	learning	A	B	learning	3	320.297	836.775	223	808	52
29	4	A	14.0314	1	871	871	131	A-B	light	learning	A	B	learning	4	202.187	593.55	131	574	34
29	5	B	33.3115	1	1824	1824	355	A-B	light	learning	A	B	learning	5	1598.48	618.573	1565	573	11
29	6	A	23.3511	1	996	996	198	A-B	light	learning	A	B	learning	6	267.248	376.349	198	322	13
29	7	A	14.5229	1	808	808	433	A-B	light	learning	A	B	learning	7	1090.01	474.439	1038	433	22
29	8	B	18.8711	1	3834	3834	435	A-B	light	learning	A	B	learning	8	1541.43	565.524	1485	516	57
29	9	A	48.4078	1	1736	1736	135	A-B	light	learning	A	B	learning	9	1491.38	214.198	1437	135	53
29	10	A	7.0178	1	1743	1743	297	A-B	light	learning	A	B	learning	10	700.649	332.308	632	297	20
29	11	B	18.0828	1	3637	3637	123	A-B	light	learning	A	B	learning	11	410.38	155.144	329	123	47
29	12	B	10.9988	1	5614	5614	218	A-B	light	learning	A	B	learning	12	289.268	263.244	218	239	44
29	13	B	10.7442	1	1416	1416	233	A-B	light	learning	A	B	learning	13	1397.29	274.254	1339	233	18
29	14	A	19.5292	1	2298	2298	282	A-B	light	learning	A	B	learning	14	606.562	819.759	526	798	45
29	15	B	32.3545	1	14043	14043	370	A-B	light	learning	A	B	learning	15	1596.48	716.664	1550	658	55
29	16	A	22.6777	1	1536	1536	395	A-B	light	learning	A	B	learning	16	1547.43	448.415	1477	395	6
29	17	B	15.0874	1	3048	3048	153	A-B	light	learning	A	B	learning	17	280.26	192.178	204	153	8
29	18	A	19.9897	1	1695	1695	387	A-B	light	learning	A	B	learning	18	1328.23	732.678	1247	693	37
29	19	B	23.0268	1	4417	4417	312	A-B	light	learning	A	B	learning	19	1651.53	412.382	1608	392	24
29	20	A	49.4147	1	2449	2449	150	A-B	light	learning	A	B	learning	20	262.243	760.704	150	724	40
29	21	A	22.0838	1	1723	1723	235	A-B	light	learning	A	B	learning	21	434.402	875.811	349	845	19
29	22	B	36.6393	1	1222	1222	178	A-B	light	learning	A	B	learning	22	797.739	220.204	700	178	10
29	23	B	39.8573	1	1297	1297	110	A-B	light	learning	A	B	learning	23	850.788	180.167	778	110	2
29	24	A	18.8602	1	11485	11485	389	A-B	light	learning	A	B	learning	24	459.425	683.633	389	670	51
29	25	B	25.2903	1	950	950	343	A-B	light	learning	A	B	learning	25	1209.12	387.359	1168	343	38
29	26	A	30.3075	1	2143	2143	235	A-B	light	learning	A	B	learning	26	1329.23	290.269	1247	235	1
29	27	A	7.7564	1	1864	1864	192	A-B	light	learning	A	B	learning	27	608.563	911.844	544	888	15
29	28	B	16.1834	1	1607	1607	249	A-B	light	learning	A	B	learning	28	1621.5	848.786	1567	831	42
29	29	A	22.8555	1	1061	1061	319	A-B	light	learning	A	B	learning	29	592.549	328.304	525	319	39
29	30	B	10.581	1	939	939	220	A-B	light	learning	A	B	learning	30	282.261	487.451	220	445	56
29	31	B	19.1105	1	1503	1503	319	A-B	light	learning	A	B	learning	31	916.849	357.331	872	319	21
29	32	A	9.6001	1	2253	2253	491	A-B	light	learning	A	B	learning	32	1260.17	627.581	1203	589	25
29	33	A	3.9723	1	942	942	257	A-B	light	search	A	B	searchA	1	968.897	291.27	903	257	33
29	34	A	38.9193	1	1180	1180	183	A-B	light	search	A	B	searchA	2	731.678	907.841	636	897	9
29	35	A	15.8968	1	1006	1006	421	A-B	light	search	A	B	searchA	3	1140.06	679.629	1089	659	54
29	36	A	45.1027	1	4832	4832	210	A-B	light	search	A	B	searchA	4	1101.02	878.814	999	870	46
29	37	A	16.5784	1	872	872	528	A-B	light	search	A	B	searchA	5	812.753	576.534	749	528	43
29	38	A	19.7505	1	2033	2033	322	A-B	light	search	A	B	searchA	6	1522.41	794.736	1478	758	7
29	39	A	6.7966	1	1723	1723	252	A-B	light	search	A	B	searchA	7	1265.17	864.801	1206	828	55
29	40	A	12.5761	1	4476	4476	336	A-B	light	search	A	B	searchA	8	1055.98	787.729	994	744	11
29	41	A	14.9649	1	1876	1876	191	A-B	light	search	A	B	searchA	9	1284.19	223.207	1236	191	27
29	42	A	8.8362	1	1764	1764	498	A-B	light	search	A	B	searchA	10	1381.28	619.574	1324	582	48
29	43	A	15.2738	1	812	812	539	A-B	light	search	A	B	searchA	11	1007.93	584.541	938	539	20
29	44	A	23.0545	1	2505	2505	284	A-B	light	search	A	B	searchA	12	1180.09	844.782	1132	796	35
29	45	A	18.6208	1	1097	1097	414	A-B	light	search	A	B	searchA	13	495.459	568.526	414	542	53
29	46	A	50.138	1	743	743	299	A-B	light	search	A	B	searchA	14	1660.54	554.513	1621	478	10
29	47	A	32.8063	1	931	931	196	A-B	light	search	A	B	searchA	15	290.269	536.497	196	515	13
29	48	A	8.9656	1	874	874	429	A-B	light	search	A	B	searchA	16	702.651	674.625	645	651	8
29	49	B	18.7746	1	972	972	373	A-B	light	test	A	B	testA-B	1	1136.05	732.678	1091	707	30
29	50	B	23.6827	1	3135	3135	302	A-B	light	test	A	B	testA-B	2	1068.99	787.729	1016	778	14
29	51	B	29.292	1	3626	3626	308	A-B	light	test	A	B	testA-B	3	701.65	799.74	610	772	50
29	52	B	31.4906	1	960	960	471	A-B	light	test	A	B	testA-B	4	1475.37	524.486	1435	471	1
29	53	B	16.1679	1	1843	1843	296	A-B	light	test	A	B	testA-B	5	639.592	342.317	570	296	39
29	54	B	15.7226	1	4807	4807	203	A-B	light	test	A	B	testA-B	6	281.26	456.423	203	429	20
29	55	B	42.2117	1	1803	1803	96	A-B	light	test	A	B	testA-B	7	383.355	156.145	289	96	28
29	56	B	28.8347	1	4163	4163	474	A-B	light	test	A	B	testA-B	8	566.525	512.475	475	474	21
29	57	B	22.0677	1	1188	1188	165	A-B	light	test	A	B	testA-B	9	249.231	356.33	165	318	40
29	58	B	33.2354	1	2047	2047	177	A-B	light	test	A	B	testA-B	10	253.234	265.246	177	203	35
29	59	B	29.3453	1	2972	2972	154	A-B	light	test	A	B	testA-B	11	749.694	981.909	671	926	57
29	60	B	9.965	1	6323	6323	345	A-B	light	test	A	B	testA-B	12	1350.25	766.71	1297	735	53
29	61	B	20.5698	1	3506	3506	194	A-B	light	test	A	B	testA-B	13	361.335	937.868	299	886	29
29	62	B	19.8571	1	2469	2469	165	A-B	light	test	A	B	testA-B	14	353.327	180.167	279	165	16
29	63	B	20.8904	1	3448	3448	166	A-B	light	test	A	B	testA-B	15	1504.39	931.863	1457	914	47
29	64	B	19.5125	1	3895	3895	206	A-B	light	test	A	B	testA-B	16	1129.05	256.237	1060	206	11
30	1	A	9.9821	1	5101	5101	411	A-B	dark	learning	A	B	learning	1	479.444	709.657	419	669	55
30	2	B	19.6073	1	2303	2303	388	A-B	dark	learning	A	B	learning	2	1614.49	506.469	1532	470	50
30	3	B	6.0444	1	1316	1316	340	A-B	dark	learning	A	B	learning	3	398.369	486.45	340	458	8
30	4	A	1.1594	1	5008	5008	134	A-B	dark	learning	A	B	learning	4	1547.43	165.153	1483	134	4
30	5	A	13.5242	1	1488	1488	262	A-B	dark	learning	A	B	learning	5	431.399	306.284	363	262	39
30	6	A	16.8047	1	8595	8595	286	A-B	dark	learning	A	B	learning	6	1094.01	838.777	1041	794	5
30	7	B	8.9386	1	4538	4538	259	A-B	dark	learning	A	B	learning	7	639.592	846.784	570	821	14
30	8	B	5.2727	1	1701	1701	327	A-B	dark	learning	A	B	learning	8	600.556	782.725	532	753	33
30	9	A	3.9807	1	1438	1438	238	A-B	dark	learning	A	B	learning	9	1676.55	270.25	1617	238	27
30	10	A	12.5758	1	1263	1263	369	A-B	dark	learning	A	B	learning	10	629.583	408.378	557	369	21
30	11	B	6.1267	1	2045	2045	405	A-B	dark	learning	A	B	learning	11	1492.38	704.653	1435	675	10
30	12	B	4.7864	1	1492	1492	205	A-B	dark	learning	A	B	learning	12	999.926	239.221	933	205	11
30	13	B	11.0174	1	2613	2613	370	A-B	dark	learning	A	B	learning	13	613.568	736.682	541	710	54
30	14	B	14.9107	1	1665	1665	411	A-B	dark	learning	A	B	learning	14	936.867	712.66	866	669	48
30	15	A	4.0893	1	1544	1544	345	A-B	dark	learning	A	B	learning	15	1389.29	376.349	1322	345	22
30	16	A	8.8054	1	4415	4415	254	A-B	dark	learning	A	B	learning	16	413.383	289.268	342	254	7
30	17	B	8.5612	1	1431	1431	98	A-B	dark	learning	A	B	learning	17	878.814	137.127	812	98	13
30	18	A	22.0526	1	2179	2179	142	A-B	dark	learning	A	B	learning	18	652.604	947.878	595	938	20
30	19	A	18.5217	1	2115	2115	476	A-B	dark	learning	A	B	learning	19	1440.33	639.592	1395	604	17
30	20	B	12.9822	1	1796	1796	357	A-B	dark	learning	A	B	learning	20	1620.5	451.418	1563	408	1
30	21	A	11.692	1	1733	1733	442	A-B	dark	learning	A	B	learning	21	1139.05	679.629	1071	638	56
30	22	B	11.2402	1	3200	3200	223	A-B	dark	learning	A	B	learning	22	1484.37	264.245	1427	223	24
30	23	B	26.6632	1	1095	1095	78	A-B	dark	learning	A	B	learning	23	903.837	127.118	821	78	25
30	24	A	17.0258	1	1303	1303	306	A-B	dark	learning	A	B	learning	24	482.447	353.327	426	306	57
30	25	B	24.4985	1	8746	8746	185	A-B	dark	learning	A	B	learning	25	845.783	902.836	790	895	34
30	26	A	8.5889	1	2177	2177	99	A-B	dark	learning	A	B	learning	26	1486.38	139.129	1424	99	38
30	27	A	15.144	1	1270	1270	386	A-B	dark	learning	A	B	learning	27	714.662	416.385	637	386	40
30	28	B	15.7618	1	3200	3200	346	A-B	dark	learning	A	B	learning	28	1645.52	634.588	1574	590	47
30	29	B	28.8917	1	7086	7086	343	A-B	dark	learning	A	B	learning	29	1516.4	782.725	1478	737	19
30	30	B	16.0365	1	4235	4235	171	A-B	dark	learning	A	B	learning	30	1455.35	218.202	1396	171	30
30	31	A	16.8513	1	1964	1964	220	A-B	dark	learning	A	B	learning	31	1339.24	898.832	1261	860	52
30	32	A	9.5845	1	1177	1177	397	A-B	dark	learning	A	B	learning	32	1017.94	723.67	956	683	53
30	33	A	4.9745	1	2234	2234	349	A-B	dark	search	A	B	searchA	1	751.696	762.706	694	731	28
30	34	A	17.1375	1	1919	1919	165	A-B	dark	search	A	B	searchA	2	431.399	960.89	359	915	36
30	35	A	12.6905	1	1866	1866	462	A-B	dark	search	A	B	searchA	3	642.595	661.613	582	618	20
30	36	A	13.5307	1	3038	3038	143	A-B	dark	search	A	B	searchA	4	736.682	186.172	667	143	33
30	37	A	16.6582	1	1670	1670	456	A-B	dark	search	A	B	searchA	5	1485.38	504.467	1424	456	1
30	38	A	11.8731	1	2299	2299	132	A-B	dark	search	A	B	searchA	6	1220.13	157.145	1167	132	30
30	39	A	16.8047	1	1026	1026	98	A-B	dark	search	A	B	searchA	7	1538.42	143.132	1485	98	27
30	40	A	13.8683	1	1293	1293	339	A-B	dark	search	A	B	searchA	8	412.382	695.644	339	655	16
30	41	A	8.0909	1	890	890	451	A-B	dark	search	A	B	searchA	9	1267.17	490.454	1207	451	56
30	42	A	5.5774	1	5293	5293	360	A-B	dark	search	A	B	searchA	10	1624.5	724.671	1560	699	51
30	43	A	22.7569	1	1614	1614	452	A-B	dark	search	A	B	searchA	11	1166.08	681.631	1100	628	13
30	44	A	19.6436	1	1352	1352	456	A-B	dark	search	A	B	searchA	12	719.666	674.625	659	624	18
30	45	A	22.6416	1	1059	1059	231	A-B	dark	search	A	B	searchA	13	1297.2	284.263	1241	231	35
30	46	A	13.481	1	14400	14400	244	A-B	dark	search	A	B	searchA	14	302.28	345.32	244	301	14
30	47	A	35.9207	1	1966	1966	223	A-B	dark	search	A	B	searchA	15	735.681	923.855	668	857	23
30	48	A	16.513	1	1250	1250	401	A-B	dark	search	A	B	searchA	16	1036.96	416.385	975	401	38
30	49	B	19.8571	1	1283	1283	236	A-B	dark	test	A	B	testA-B	1	716.664	251.233	643	236	9
30	50	B	15.2834	1	2722	2722	141	A-B	dark	test	A	B	testA-B	2	215.199	929.861	141	888	23
30	51	B	14.5731	1	2152	2152	428	A-B	dark	test	A	B	testA-B	3	1439.33	697.646	1377	652	51
30	52	B	5.0849	1	1411	1411	353	A-B	dark	test	A	B	testA-B	4	1221.13	757.702	1153	727	53
30	53	B	NA	0	timeout	20000	452	A-B	dark	test	A	B	testA-B	5	NA	NA	1468	578	20
30	54	B	20.2359	1	3522	3522	140	A-B	dark	test	A	B	testA-B	6	739.685	973.902	657	940	1
30	55	B	3.5329	1	1902	1902	113	A-B	dark	test	A	B	testA-B	7	1248.16	148.137	1185	113	48
30	56	B	10.592	1	971	971	376	A-B	dark	test	A	B	testA-B	8	1255.16	418.387	1191	376	18
30	57	B	16.0819	1	1144	1144	429	A-B	dark	test	A	B	testA-B	9	1268.17	473.438	1195	429	5
30	58	B	16.8044	1	5615	5615	350	A-B	dark	test	A	B	testA-B	10	510.473	777.72	450	730	38
30	59	B	14.0383	1	2060	2060	344	A-B	dark	test	A	B	testA-B	11	401.372	377.349	352	344	46
30	60	B	7.5047	1	3289	3289	138	A-B	dark	test	A	B	testA-B	12	340.315	172.159	270	138	54
30	61	B	25.251	1	1470	1470	310	A-B	dark	test	A	B	testA-B	13	690.639	358.332	609	310	2
30	62	B	35.2297	1	2990	2990	153	A-B	dark	test	A	B	testA-B	14	298.276	199.184	203	153	37
30	63	B	15.5721	1	1746	1746	292	A-B	dark	test	A	B	testA-B	15	715.663	339.314	654	292	8
30	64	B	13.3906	1	2736	2736	255	A-B	dark	test	A	B	testA-B	16	409.379	863.8	335	825	41
32	2	B	14.9629	1	8233	8233	266	A-B	dark	learning	A	B	learning	2	1701.58	661.613	1654	631	34
32	4	A	21.5476	1	2512	2512	422	A-B	dark	learning	A	B	learning	4	494.458	553.513	422	502	16
32	5	B	22.0745	1	2129	2129	160	A-B	dark	learning	A	B	learning	5	1099.02	971.9	1028	920	29
32	6	A	14.5088	1	2225	2225	416	A-B	dark	learning	A	B	learning	6	485.45	454.421	435	416	27
32	7	A	6.1735	1	2420	2420	267	A-B	dark	learning	A	B	learning	7	1372.27	847.785	1304	813	28
32	8	B	10.3811	1	10026	10026	85	A-B	dark	learning	A	B	learning	8	986.914	123.114	916	85	24
32	9	B	18.6633	1	2135	2135	276	A-B	dark	learning	A	B	learning	9	498.462	842.78	418	804	20
32	10	B	9.3517	1	3592	3592	264	A-B	dark	learning	A	B	learning	10	342.317	838.777	283	816	43
32	11	A	11.7533	1	5975	5975	181	A-B	dark	learning	A	B	learning	11	784.727	920.853	729	899	33
32	12	A	31.3374	1	4752	4752	316	A-B	dark	learning	A	B	learning	12	1660.54	404.374	1604	342	45
32	13	A	9.7819	1	3322	3322	176	A-B	dark	learning	A	B	learning	13	626.58	940.871	556	904	14
32	14	B	13.4701	1	2971	2971	327	A-B	dark	learning	A	B	learning	14	383.355	436.404	327	393	18
32	15	A	14.5749	1	2393	2393	348	A-B	dark	learning	A	B	learning	15	1213.12	773.716	1140	732	42
32	16	B	13.4701	1	1991	1991	340	A-B	dark	learning	A	B	learning	16	714.662	383.355	659	340	23
32	17	A	19.6079	1	1684	1684	92	A-B	dark	learning	A	B	learning	17	635.588	139.129	585	92	13
32	18	A	16.6723	1	3013	3013	374	A-B	dark	learning	A	B	learning	18	1285.19	753.698	1220	706	32
32	19	B	6.6028	1	1838	1838	453	A-B	dark	learning	A	B	learning	19	1199.11	491.455	1137	453	5
32	20	B	3.9354	1	1929	1929	419	A-B	dark	learning	A	B	learning	20	538.499	689.639	472	661	46
32	21	B	14.0864	1	3677	3677	102	A-B	dark	learning	A	B	learning	21	1422.32	139.129	1372	102	22
32	22	A	19.4753	1	1879	1879	88	A-B	dark	learning	A	B	learning	22	1479.37	134.124	1429	88	17
32	23	B	13.7435	1	1676	1676	321	A-B	dark	learning	A	B	learning	23	1619.5	780.723	1566	759	55
32	24	A	35.3991	1	1318	1318	351	A-B	dark	learning	A	B	learning	24	1122.04	404.374	1031	351	51
32	25	A	19.5125	1	4185	4185	104	A-B	dark	learning	A	B	learning	25	1326.23	154.143	1257	104	39
32	26	A	12.4474	1	946	946	345	A-B	dark	learning	A	B	learning	26	1364.26	373.346	1313	345	21
32	27	B	14.0635	1	8282	8282	304	A-B	dark	learning	A	B	learning	27	930.862	801.742	881	776	11
32	28	B	11.54	1	3008	3008	130	A-B	dark	learning	A	B	learning	28	1436.33	173.16	1373	130	8
32	29	A	27.422	1	16396	16396	65	A-B	dark	learning	A	B	learning	29	337.312	122.113	284	65	7
32	30	B	34.0755	1	13505	13505	172	A-B	dark	learning	A	B	learning	30	325.301	233.216	279	172	54
32	31	A	15.0797	1	1708	1708	411	A-B	dark	learning	A	B	learning	31	676.626	442.41	599	411	31
32	32	B	23.716	1	7882	7882	156	A-B	dark	learning	A	B	learning	32	875.811	972.901	829	924	6
32	33	A	1.7975	1	4967	4967	272	A-B	dark	search	A	B	searchA	1	894.828	305.283	833	272	29
32	34	A	12.5854	1	1301	1301	153	A-B	dark	search	A	B	searchA	2	553.513	197.183	489	153	1
32	35	A	8.6986	1	3976	3976	229	A-B	dark	search	A	B	searchA	3	1318.22	885.82	1263	851	20
32	36	A	17.351	1	10464	10464	432	A-B	dark	search	A	B	searchA	4	1400.3	470.436	1321	432	17
32	37	A	NA	0	timeout	20000	447	A-B	dark	search	A	B	searchA	5	NA	NA	649	633	35
32	38	A	31.7829	1	3413	3413	282	A-B	dark	search	A	B	searchA	6	1686.56	800.741	1638	741	19
32	39	A	17.2206	1	2246	2246	363	A-B	dark	search	A	B	searchA	7	555.514	756.701	507	717	8
32	40	A	24.2612	1	2482	2482	271	A-B	dark	search	A	B	searchA	8	1702.58	450.417	1649	396	15
32	41	A	27.3582	1	4414	4414	166	A-B	dark	search	A	B	searchA	9	951.881	969.898	877	914	39
32	42	A	16.6845	1	1181	1181	411	A-B	dark	search	A	B	searchA	10	1109.03	695.644	1030	669	18
32	43	A	25.251	1	2122	2122	324	A-B	dark	search	A	B	searchA	11	699.648	803.744	618	756	22
32	44	A	3.2639	1	3694	3694	90	A-B	dark	search	A	B	searchA	12	1297.2	124.115	1232	90	28
32	45	A	9.6526	1	11525	11525	406	A-B	dark	search	A	B	searchA	13	1273.18	699.648	1218	674	4
32	46	A	24.6954	1	1523	1523	246	A-B	dark	search	A	B	searchA	14	1323.23	859.796	1236	834	37
32	47	A	11.3415	1	8063	8063	344	A-B	dark	search	A	B	searchA	15	1047.97	764.708	974	736	40
32	48	A	16.6985	1	3990	3990	318	A-B	dark	search	A	B	searchA	16	455.422	804.745	380	762	32
32	49	B	15.2703	1	1313	1313	466	A-B	dark	test	A	B	testA-B	1	1012.94	486.45	940	466	24
32	50	B	13.2942	1	4412	4412	159	A-B	dark	test	A	B	testA-B	2	259.24	198.184	207	159	46
32	51	B	22.4917	1	3816	3816	89	A-B	dark	test	A	B	testA-B	3	518.48	134.124	473	89	28
32	52	B	27.345	1	16659	16659	465	A-B	dark	test	A	B	testA-B	4	1491.38	554.513	1455	518	25
32	53	B	55.4168	1	2045	2045	219	A-B	dark	test	A	B	testA-B	5	326.302	912.845	219	848	50
32	54	B	22.6222	1	1426	1426	484	A-B	dark	test	A	B	testA-B	6	881.817	534.495	832	484	6
32	55	B	21.2299	1	1706	1706	394	A-B	dark	test	A	B	testA-B	7	1565.45	734.68	1514	686	39
32	56	B	25.5529	1	1822	1822	306	A-B	dark	test	A	B	testA-B	8	369.342	458.425	306	401	37
32	57	B	5.9053	1	6126	6126	332	A-B	dark	test	A	B	testA-B	9	1356.26	369.342	1291	332	32
32	58	B	22.7411	1	9323	9323	180	A-B	dark	test	A	B	testA-B	10	264.245	378.35	180	338	9
32	59	B	10.581	1	16787	16787	527	A-B	dark	test	A	B	testA-B	11	1394.29	594.551	1332	553	5
32	60	B	6.7572	1	1595	1595	389	A-B	dark	test	A	B	testA-B	12	941.872	717.664	874	691	45
32	61	B	40.0659	1	1713	1713	242	A-B	dark	test	A	B	testA-B	13	1580.46	888.823	1552	838	22
32	62	B	1.0812	1	15079	15079	409	A-B	dark	test	A	B	testA-B	14	861.798	441.409	800	409	26
32	63	B	23.5658	1	2118	2118	339	A-B	dark	test	A	B	testA-B	15	1665.54	571.529	1581	529	27
32	64	B	21.5385	1	3695	3695	442	A-B	dark	test	A	B	testA-B	16	1530.42	650.602	1478	601	34
33	1	B	14.4572	1	1232	1232	245	A-B	light	learning	A	B	learning	1	1510.4	290.269	1442	245	8
33	2	A	10.9108	1	2232	2232	103	A-B	light	learning	A	B	learning	2	706.654	130.12	654	103	7
33	3	A	19.6443	1	1107	1107	331	A-B	light	learning	A	B	learning	3	1047.97	345.32	994	331	14
33	4	B	39.3993	1	1098	1098	188	A-B	light	learning	A	B	learning	4	1321.22	961.891	1250	892	49
33	5	B	18.4059	1	1681	1681	158	A-B	light	learning	A	B	learning	5	1509.4	949.88	1428	922	23
33	6	B	15.948	1	1609	1609	270	A-B	light	learning	A	B	learning	6	364.337	829.768	290	810	41
33	7	A	15.3055	1	2802	2802	434	A-B	light	learning	A	B	learning	7	1166.08	662.614	1108	646	11
33	8	A	7.6102	1	1000	1000	282	A-B	light	learning	A	B	learning	8	1043.97	321.298	980	282	50
33	10	A	14.7901	1	1724	1724	410	A-B	light	learning	A	B	learning	10	1263.17	714.662	1206	670	34
33	11	B	5.1776	1	913	913	369	A-B	light	learning	A	B	learning	11	722.669	402.373	665	369	22
33	12	A	19.6436	1	1182	1182	354	A-B	light	learning	A	B	learning	12	415.385	464.43	354	413	25
33	13	A	6.8181	1	937	937	389	A-B	light	learning	A	B	learning	13	622.577	427.396	562	389	10
33	14	B	14.6884	1	2419	2419	258	A-B	light	learning	A	B	learning	14	1712.59	593.55	1662	554	44
33	15	B	31.1308	1	1567	1567	298	A-B	light	learning	A	B	learning	15	1079	843.781	1022	782	13
33	16	A	9.965	1	4952	4952	127	A-B	light	learning	A	B	learning	16	501.464	984.912	448	953	1
33	17	A	19.5097	1	1507	1507	414	A-B	light	learning	A	B	learning	17	598.554	682.632	522	666	46
33	18	A	5.2956	1	10537	10537	81	A-B	light	learning	A	B	learning	18	1040.96	116.108	982	81	12
33	19	B	14.614	1	1024	1024	442	A-B	light	learning	A	B	learning	19	921.854	459.425	861	442	35
33	20	B	54.7953	1	4091	4091	272	A-B	light	learning	A	B	learning	20	1037.96	863.8	1024	808	55
33	22	A	21.5751	1	1569	1569	63	A-B	light	learning	A	B	learning	22	1179.09	116.108	1115	63	16
33	23	A	13.9625	1	1864	1864	210	A-B	light	learning	A	B	learning	23	259.24	766.71	210	736	43
33	24	B	9.6729	1	1877	1877	273	A-B	light	learning	A	B	learning	24	607.563	312.289	538	273	20
33	25	B	21.3149	1	2376	2376	469	A-B	light	learning	A	B	learning	25	1089.01	493.457	1046	469	38
33	26	A	33.2191	1	1904	1904	367	A-B	light	learning	A	B	learning	26	694.643	770.714	652	713	3
33	27	A	19.4557	1	1796	1796	347	A-B	light	learning	A	B	learning	27	1619.5	630.584	1573	590	27
33	28	B	10.3299	1	936	936	368	A-B	light	learning	A	B	learning	28	666.617	407.377	597	368	56
33	29	B	9.2854	1	1275	1275	484	A-B	light	learning	A	B	learning	29	1402.3	513.475	1348	484	53
33	30	B	30.8819	1	1398	1398	334	A-B	light	learning	A	B	learning	30	790.732	806.747	737	746	36
33	31	A	5.5774	1	896	896	374	A-B	light	learning	A	B	learning	31	728.675	731.678	665	706	17
33	32	A	13.0796	1	3008	3008	150	A-B	light	learning	A	B	learning	32	585.542	191.177	531	150	29
33	33	A	20.4021	1	1188	1188	323	A-B	light	search	A	B	searchA	1	785.727	795.737	742	757	15
33	34	A	14.0127	1	3050	3050	130	A-B	light	search	A	B	searchA	2	1086.01	992.919	1031	950	25
33	35	A	16.7534	1	1188	1188	421	A-B	light	search	A	B	searchA	3	1416.31	442.41	1340	421	31
33	36	A	14.8478	1	981	981	127	A-B	light	search	A	B	searchA	4	638.591	171.159	584	127	22
[truncated: 5,489 more rows]

## Sheet: Exp C Disruptive Distractive
Participant	slide	mothTreatment	clickDist	hit	time	timeTo20	edgeDist	treatment	inverted	trialPhase	searchTreatment	testTreatment	phaseInc	phaseSlide	ClickX	ClickY	TargetX	TargetY	backgroundID
1	1	A	NA	0	timeout	20000	266	A-A	light	learning	A	A	learning	1	NA	NA	1630	814	32
1	2	B	13.7252	1	5828	5828	261	A-A	light	learning	A	A	learning	2	336.311	777.72	261	740	31
1	3	B	7.0806	1	3402	3402	282	A-A	light	learning	A	A	learning	3	352.326	698.647	282	668	24
1	4	A	16.4568	1	4603	4603	153	A-A	light	learning	A	A	learning	4	1355.25	961.891	1276	927	17
1	5	A	22.6329	1	1676	1676	191	A-A	light	learning	A	A	learning	5	1534.42	928.86	1492	889	20
1	6	A	4.6303	1	4230	4230	143	A-A	light	learning	A	A	learning	6	209.194	573.531	143	546	51
1	7	B	16.8047	1	2678	2678	300	A-A	light	learning	A	A	learning	7	637.59	345.32	585	300	3
1	8	B	22.9854	1	2733	2733	486	A-A	light	learning	A	A	learning	8	975.904	534.495	929	486	2
1	9	B	11.601	1	895	895	394	A-A	light	learning	A	A	learning	9	1131.05	422.391	1057	394	22
1	10	A	39.1773	1	2538	2538	92	A-A	light	learning	A	A	learning	10	535.496	160.148	458	92	19
1	11	B	7.7945	1	885	885	266	A-A	light	learning	A	A	learning	11	1174.09	301.279	1118	266	48
1	12	A	52.8966	1	6037	6037	421	A-A	light	learning	A	A	learning	12	1051.97	641.594	968	659	21
1	13	B	45.8701	1	1398	1398	339	A-A	light	learning	A	A	learning	13	1364.26	396.367	1263	339	47
1	14	A	24.8857	1	1895	1895	486	A-A	light	learning	A	A	learning	14	571.529	563.522	486	544	12
1	15	A	10.7442	1	1503	1503	270	A-A	light	learning	A	A	learning	15	1120.04	311.288	1062	270	18
1	16	B	32.4875	1	1020	1020	365	A-A	light	learning	A	A	learning	16	1081	409.379	1048	365	39
1	17	A	12.9622	1	1113	1113	345	A-A	light	learning	A	A	learning	17	1191.1	376.349	1141	345	35
1	18	B	31.2518	1	1660	1660	196	A-A	light	learning	A	A	learning	18	277.257	284.263	196	278	49
1	19	A	20.1888	1	14755	14755	90	A-A	light	learning	A	A	learning	19	976.904	106.098	927	90	11
1	20	B	6.7966	1	2959	2959	123	A-A	light	learning	A	A	learning	20	225.208	148.137	160	123	46
1	21	B	37.8613	1	1350	1350	444	A-A	light	learning	A	A	learning	21	1353.25	694.643	1316	636	25
1	22	A	13.2	1	1243	1243	439	A-A	light	learning	A	A	learning	22	807.748	479.444	735	439	37
1	23	A	15.5796	1	1324	1324	531	A-A	light	learning	A	A	learning	23	819.759	571.529	744	549	28
1	24	B	30.7886	1	1564	1564	277	A-A	light	learning	A	A	learning	24	1679.56	467.433	1643	419	42
1	25	A	29.2964	1	1274	1274	487	A-A	light	learning	A	A	learning	25	1142.06	599.555	1063	593	29
1	26	A	4.6877	1	1753	1753	420	A-A	light	learning	A	A	learning	26	1253.16	693.642	1194	660	40
1	27	B	20.5107	1	1654	1654	528	A-A	light	learning	A	A	learning	27	653.605	567.525	572	528	56
1	28	B	40.0058	1	3738	3738	221	A-A	light	learning	A	A	learning	28	949.88	251.233	927	221	26
1	29	A	19.5608	1	8773	8773	176	A-A	light	learning	A	A	learning	29	1204.11	927.859	1123	904	14
1	30	A	42.8385	1	1040	1040	472	A-A	light	learning	A	A	learning	30	916.849	491.455	895	472	34
1	31	B	18.8602	1	2480	2480	318	A-A	light	learning	A	A	learning	31	388.36	708.656	318	695	30
1	32	B	18.6604	1	1269	1269	527	A-A	light	learning	A	A	learning	32	1009.94	574.532	931	553	1
1	33	A	5.9658	1	14184	14184	277	A-A	light	search	A	A	searchA	1	336.311	472.437	277	445	39
1	34	A	31.3052	1	1997	1997	310	A-A	light	search	A	A	searchA	2	1471.36	783.726	1434	770	51
1	35	A	20.1352	1	1504	1504	332	A-A	light	search	A	A	searchA	3	1012.94	780.723	930	748	30
1	36	A	41.8475	1	5612	5612	170	A-A	light	search	A	A	searchA	4	192.178	484.449	170	461	9
1	37	A	26.6585	1	2067	2067	204	A-A	light	search	A	A	searchA	5	244.226	745.691	204	701	3
1	38	A	9.0306	1	2792	2792	322	A-A	light	search	A	A	searchA	6	1606.49	797.739	1546	758	33
1	39	A	20.9459	1	2123	2123	285	A-A	light	search	A	A	searchA	7	1701.58	500.463	1635	448	18
1	40	A	23.1304	1	3259	3259	504	A-A	light	search	A	A	searchA	8	908.841	624.578	831	576	45
1	41	A	42.2766	1	852	852	423	A-A	light	search	A	A	searchA	9	1246.15	487.451	1210	423	57
1	42	A	32.2911	1	2314	2314	361	A-A	light	search	A	A	searchA	10	1399.3	397.368	1368	361	55
1	43	A	65.5557	1	1652	1652	492	A-A	light	search	A	A	searchA	11	789.731	583.54	672	588	50
1	44	A	37.9501	1	970	970	219	A-A	light	search	A	A	searchA	12	1217.13	282.261	1133	219	48
1	45	A	8.1705	1	3018	3018	172	A-A	light	search	A	A	searchA	13	1122.04	933.865	1053	908	20
1	46	A	19.5608	1	1589	1589	435	A-A	light	search	A	A	searchA	14	767.711	459.425	687	435	27
1	47	A	31.8603	1	886	886	318	A-A	light	search	A	A	searchA	15	1199.11	342.317	1167	318	16
1	48	A	27.7517	1	3075	3075	181	A-A	light	search	A	A	searchA	16	1568.45	239.221	1497	181	5
1	49	A	4.554	1	2576	2576	261	A-A	light	test	A	A	testA-A	1	321.298	584.541	261	557	48
1	50	A	27.2544	1	1277	1277	450	A-A	light	test	A	A	testA-A	2	880.816	457.423	830	450	40
1	51	A	13.2536	1	1855	1855	229	A-A	light	test	A	A	testA-A	3	1099.02	876.812	1024	851	29
1	52	A	6.2735	1	4024	4024	217	A-A	light	test	A	A	testA-A	4	476.441	243.225	410	217	51
1	53	A	3.9807	1	9191	9191	455	A-A	light	test	A	A	testA-A	5	796.738	483.448	736	455	45
1	54	A	7.7827	1	7057	7057	157	A-A	light	test	A	A	testA-A	6	218.202	771.715	157	733	44
1	55	A	5.2956	1	3322	3322	262	A-A	light	test	A	A	testA-A	7	1716.59	818.758	1658	784	30
1	56	A	3.1067	1	1132	1132	261	A-A	light	test	A	A	testA-A	8	1090.01	293.272	1024	261	41
1	57	A	8.0832	1	11192	11192	93	A-A	light	test	A	A	testA-A	9	318.295	125.116	247	93	11
1	58	A	11.905	1	1809	1809	472	A-A	light	test	A	A	testA-A	10	1358.26	510.473	1305	472	39
1	59	A	35.9612	1	3477	3477	439	A-A	light	test	A	A	testA-A	11	1390.29	702.651	1346	641	3
1	60	A	21.7077	1	3351	3351	224	A-A	light	test	A	A	testA-A	12	598.554	234.217	532	224	14
1	61	A	16.156	1	2970	2970	173	A-A	light	test	A	A	testA-A	13	1295.2	940.871	1248	907	32
1	62	A	32.27	1	4781	4781	301	A-A	light	test	A	A	testA-A	14	952.882	827.766	863	779	8
1	63	A	37.1219	1	1698	1698	521	A-A	light	test	A	A	testA-A	15	1146.06	620.575	1062	559	49
1	64	A	12.349	1	1386	1386	419	A-A	light	test	A	A	testA-A	16	1150.06	686.636	1076	661	21
2	1	B	33.0764	1	2827	2827	243	A-A	dark	learning	A	A	learning	1	1596.48	859.796	1565	837	9
2	2	A	9.5382	1	3728	3728	261	A-A	dark	learning	A	A	learning	2	1102.02	859.796	1039	819	44
2	3	A	21.4243	1	4371	4371	224	A-A	dark	learning	A	A	learning	3	313.29	276.256	244	224	5
2	4	B	17.9835	1	2710	2710	418	A-A	dark	learning	A	A	learning	4	1428.32	467.433	1369	418	31
2	5	B	25.8066	1	859	859	140	A-A	dark	learning	A	A	learning	5	1201.11	196.182	1146	140	41
2	6	A	23.1114	1	965	965	424	A-A	dark	learning	A	A	learning	6	976.904	478.443	909	424	39
2	7	A	10.4807	1	2094	2094	259	A-A	dark	learning	A	A	learning	7	1723.6	357.331	1661	336	50
2	8	B	8.6025	1	1311	1311	500	A-A	dark	learning	A	A	learning	8	564.523	584.541	500	545	23
2	9	B	22.2647	1	4274	4274	396	A-A	dark	learning	A	A	learning	9	792.734	703.652	711	684	3
2	10	B	16.5713	1	2123	2123	290	A-A	dark	learning	A	A	learning	10	469.435	338.313	407	290	10
2	11	A	35.7012	1	1789	1789	350	A-A	dark	learning	A	A	learning	11	404.374	696.645	350	631	47
2	12	A	23.9685	1	3151	3151	504	A-A	dark	learning	A	A	learning	12	1075	535.496	1036	504	52
2	13	B	18.0812	1	852	852	322	A-A	dark	learning	A	A	learning	13	995.922	353.327	915	322	20
2	14	A	50.2717	1	3725	3725	158	A-A	dark	learning	A	A	learning	14	259.24	1001.93	209	922	49
2	15	A	25.7511	1	2744	2744	265	A-A	dark	learning	A	A	learning	15	1628.51	272.252	1573	265	37
2	16	B	21.0127	1	2608	2608	375	A-A	dark	learning	A	A	learning	16	571.529	405.375	529	375	57
2	17	A	19.3898	1	3320	3320	191	A-A	dark	learning	A	A	learning	17	850.788	219.203	769	191	45
2	18	A	18.2912	1	2961	2961	100	A-A	dark	learning	A	A	learning	18	1687.56	128.119	1643	100	53
2	19	B	3.6879	1	1009	1009	472	A-A	dark	learning	A	A	learning	19	658.61	507.47	595	472	34
2	20	B	36.5534	1	1528	1528	83	A-A	dark	learning	A	A	learning	20	1359.26	108.1	1332	83	18
2	21	A	34.3519	1	18375	18375	377	A-A	dark	learning	A	A	learning	21	429.398	444.411	377	380	29
2	22	B	25.236	1	1774	1774	388	A-A	dark	learning	A	A	learning	22	1604.49	449.416	1532	394	12
2	23	B	18.417	1	1724	1724	463	A-A	dark	learning	A	A	learning	23	693.642	498.462	613	463	43
2	24	A	19.5125	1	10992	10992	519	A-A	dark	learning	A	A	learning	24	1409.3	569.527	1340	519	2
2	25	B	10.367	1	2085	2085	436	A-A	dark	learning	A	A	learning	25	1250.16	672.623	1177	644	56
2	26	B	13.9299	1	1349	1349	493	A-A	dark	learning	A	A	learning	26	811.752	630.584	743	587	28
2	27	A	8.4364	1	4898	4898	196	A-A	dark	learning	A	A	learning	27	1489.38	912.845	1418	884	4
2	28	A	16.683	1	8767	8767	226	A-A	dark	learning	A	A	learning	28	300.278	728.675	226	710	17
2	29	A	10.4922	1	4311	4311	327	A-A	dark	learning	A	A	learning	29	381.353	591.548	327	566	7
2	30	B	23.9491	1	2717	2717	385	A-A	dark	learning	A	A	learning	30	1606.49	713.661	1535	660	42
2	31	B	37.6704	1	1134	1134	298	A-A	dark	learning	A	A	learning	31	370.343	523.485	298	455	22
2	32	A	7.0806	1	2820	2820	271	A-A	dark	learning	A	A	learning	32	1166.08	302.28	1096	271	51
2	33	A	17.4446	1	4032	4032	152	A-A	dark	search	A	A	searchA	1	992.919	945.876	919	928	51
2	34	A	12.4912	1	4130	4130	136	A-A	dark	search	A	A	searchA	2	207.192	376.349	136	335	16
2	35	A	30.3948	1	2279	2279	119	A-A	dark	search	A	A	searchA	3	975.904	169.157	889	119	2
2	36	A	18.4059	1	1844	1844	264	A-A	dark	search	A	A	searchA	4	335.31	714.662	264	667	5
2	37	A	37.3308	1	4153	4153	249	A-A	dark	search	A	A	searchA	5	1597.48	290.269	1498	249	7
2	38	A	19.5576	1	2875	2875	301	A-A	dark	search	A	A	searchA	6	1362.26	819.759	1282	779	52
2	39	A	25.9729	1	1834	1834	322	A-A	dark	search	A	A	searchA	7	1374.27	812.753	1322	758	11
2	40	A	46.2594	1	4999	4999	395	A-A	dark	search	A	A	searchA	8	1442.34	761.705	1387	685	40
2	41	A	22.3392	1	2158	2158	275	A-A	dark	search	A	A	searchA	9	1292.2	321.298	1246	275	54
2	42	A	18.0812	1	2744	2744	235	A-A	dark	search	A	A	searchA	10	316.293	610.565	235	580	25
2	43	A	13.2006	1	1817	1817	360	A-A	dark	search	A	A	searchA	11	1374.27	402.373	1319	360	24
2	44	A	10.2503	1	3784	3784	526	A-A	dark	search	A	A	searchA	12	1204.11	592.549	1148	554	49
2	45	A	18.1349	1	1220	1220	468	A-A	dark	search	A	A	searchA	13	549.509	609.564	468	580	17
2	46	A	14.8478	1	2031	2031	481	A-A	dark	search	A	A	searchA	14	1494.38	566.525	1439	522	55
2	47	A	5.4056	1	1962	1962	299	A-A	dark	search	A	A	searchA	15	418.387	335.31	358	299	21
2	48	A	21.7622	1	1481	1481	265	A-A	dark	search	A	A	searchA	16	516.478	828.767	466	815	1
2	49	A	11.7002	1	14711	14711	132	A-A	dark	test	A	A	testA-A	1	1194.11	986.914	1140	948	19
2	50	A	33.83	1	7410	7410	362	A-A	dark	test	A	A	testA-A	2	1600.48	764.708	1558	707	29
2	51	A	21.4243	1	1321	1321	321	A-A	dark	test	A	A	testA-A	3	1166.08	373.346	1097	321	51
2	52	A	18.0692	1	5675	5675	80	A-A	dark	test	A	A	testA-A	4	1579.46	103.096	1532	80	18
2	53	A	2.4381	1	1431	1431	181	A-A	dark	test	A	A	testA-A	5	339.314	211.196	278	181	41
2	54	A	19.5576	1	1337	1337	492	A-A	dark	test	A	A	testA-A	6	789.731	533.494	710	492	44
2	55	A	13.1597	1	8398	8398	233	A-A	dark	test	A	A	testA-A	7	309.286	397.368	233	364	3
2	56	A	4.6564	1	1586	1586	527	A-A	dark	test	A	A	testA-A	8	763.707	556.515	705	527	43
2	57	A	18.1611	1	4124	4124	139	A-A	dark	test	A	A	testA-A	9	216.2	645.598	139	626	50
2	58	A	11.6627	1	5749	5749	441	A-A	dark	test	A	A	testA-A	10	1261.17	465.431	1207	441	34
2	59	A	4.5986	1	2468	2468	239	A-A	dark	test	A	A	testA-A	11	311.288	867.803	247	841	39
2	60	A	18.1981	1	1865	1865	308	A-A	dark	test	A	A	testA-A	12	1620.5	814.754	1543	772	13
2	61	A	9.3517	1	806	806	382	A-A	dark	test	A	A	testA-A	13	1105.02	405.375	1046	382	56
2	62	A	20.7581	1	7612	7612	244	A-A	dark	test	A	A	testA-A	14	1417.31	296.274	1357	244	54
2	63	A	26.8838	1	17602	17602	294	A-A	dark	test	A	A	testA-A	15	370.343	361.335	294	353	31
2	64	A	NA	0	timeout	20000	206	A-A	dark	test	A	A	testA-A	16	NA	NA	206	531	23
3	1	A	14.7901	1	1314	1314	224	A-A	light	learning	A	A	learning	1	461.427	269.249	404	224	50
3	2	A	NA	0	timeout	20000	360	A-A	light	learning	A	A	learning	2	NA	NA	1560	398	40
3	3	B	NA	0	timeout	20000	197	A-A	light	learning	A	A	learning	3	NA	NA	1108	883	28
3	4	B	9.758	1	1933	1933	370	A-A	light	learning	A	A	learning	4	1241.15	750.695	1176	710	19
3	5	A	14.2291	1	3478	3478	70	A-A	light	learning	A	A	learning	5	266.247	109.101	191	70	14
3	6	B	12.0503	1	1695	1695	487	A-A	light	learning	A	A	learning	6	1067.99	520.482	1017	487	57
3	7	B	18.1981	1	1143	1143	528	A-A	light	learning	A	A	learning	7	1208.12	571.529	1131	528	54
3	8	A	NA	0	timeout	20000	196	A-A	light	learning	A	A	learning	8	NA	NA	196	643	43
3	9	B	13.1987	1	2543	2543	269	A-A	light	learning	A	A	learning	9	727.674	303.281	678	269	36
3	10	A	32.5594	1	1663	1663	524	A-A	light	learning	A	A	learning	10	596.552	588.545	533	524	5
3	11	B	20.1308	1	6894	6894	259	A-A	light	learning	A	A	learning	11	1027.95	850.788	945	821	47
3	12	A	15.4069	1	2506	2506	359	A-A	light	learning	A	A	learning	12	413.383	604.56	359	561	46
3	13	A	10.2873	1	4813	4813	199	A-A	light	learning	A	A	learning	13	783.726	904.838	714	881	8
3	14	B	6.7492	1	1272	1272	353	A-A	light	learning	A	A	learning	14	515.477	379.351	456	353	30
3	15	B	13.8795	1	5016	5016	258	A-A	light	learning	A	A	learning	15	766.71	865.802	710	822	11
3	16	A	7.8988	1	1339	1339	450	A-A	light	learning	A	A	learning	16	1087.01	485.45	1017	450	37
3	17	A	40.0996	1	2069	2069	188	A-A	light	learning	A	A	learning	17	589.546	250.232	553	188	4
3	18	A	31.0157	1	1972	1972	140	A-A	light	learning	A	A	learning	18	298.276	990.918	211	940	32
3	19	B	17.3245	1	3630	3630	435	A-A	light	learning	A	A	learning	19	1208.12	688.638	1157	645	51
3	20	B	18.0185	1	1999	1999	136	A-A	light	learning	A	A	learning	20	1124.04	961.891	1073	944	35
3	21	B	29.6077	1	1851	1851	391	A-A	light	learning	A	A	learning	21	1407.3	745.691	1359	689	56
3	22	A	24.3529	1	12591	12591	341	A-A	light	learning	A	A	learning	22	1655.53	764.708	1579	713	45
3	23	B	44.8857	1	3537	3537	215	A-A	light	learning	A	A	learning	23	1140.06	908.841	1034	865	22
3	24	A	34.7856	1	15174	15174	347	A-A	light	learning	A	A	learning	24	406.376	589.546	347	523	29
3	25	B	27.4784	1	1388	1388	337	A-A	light	learning	A	A	learning	25	785.727	762.706	748	743	24
3	26	B	7.2166	1	2434	2434	100	A-A	light	learning	A	A	learning	26	1349.25	138.128	1283	100	2
3	27	A	11.2402	1	12142	12142	344	A-A	light	learning	A	A	learning	27	452.419	756.701	385	736	53
3	28	A	11.9645	1	1443	1443	384	A-A	light	learning	A	A	learning	28	732.678	416.385	682	384	25
3	29	B	20.8886	1	6570	6570	391	A-A	light	learning	A	A	learning	29	1426.32	735.681	1377	689	9
3	30	A	21.1138	1	2062	2062	430	A-A	light	learning	A	A	learning	30	513.475	589.546	430	552	34
3	31	B	44.83	1	1781	1781	446	A-A	light	learning	A	A	learning	31	1558.44	598.554	1474	527	21
3	32	A	13.481	1	3990	3990	282	A-A	light	learning	A	A	learning	32	1461.35	302.28	1391	282	23
3	33	A	10.3299	1	1594	1594	301	A-A	light	search	A	A	searchA	1	766.71	817.757	697	779	49
3	34	A	42.6129	1	2729	2729	133	A-A	light	search	A	A	searchA	2	194.18	723.67	133	650	11
3	35	A	7.478	1	2138	2138	143	A-A	light	search	A	A	searchA	3	1116.03	167.155	1053	143	10
3	36	A	35.1462	1	14882	14882	127	A-A	light	search	A	A	searchA	4	1016.94	980.908	989	953	20
3	37	A	20.3806	1	1146	1146	494	A-A	light	search	A	A	searchA	5	1271.18	609.564	1227	586	8
3	38	A	5.3832	1	2010	2010	124	A-A	light	search	A	A	searchA	6	914.847	159.147	848	124	31
3	39	A	11.0812	1	3431	3431	406	A-A	light	search	A	A	searchA	7	533.494	713.661	463	674	16
3	40	A	4.554	1	1446	1446	439	A-A	light	search	A	A	searchA	8	598.554	467.433	538	439	56
3	41	A	30.7275	1	1353	1353	234	A-A	light	search	A	A	searchA	9	1031.96	855.792	991	846	13
3	42	A	NA	0	timeout	20000	197	A-A	light	search	A	A	searchA	10	NA	NA	197	521	21
3	43	A	8.7822	1	1620	1620	315	A-A	light	search	A	A	searchA	11	386.358	613.568	315	586	39
3	44	A	6.5355	1	2075	2075	380	A-A	light	search	A	A	searchA	12	1354.25	418.387	1291	380	14
3	45	A	9.9255	1	9450	9450	179	A-A	light	search	A	A	searchA	13	1241.15	940.871	1173	901	12
3	46	A	26.0161	1	3662	3662	461	A-A	light	search	A	A	searchA	14	1450.34	513.475	1403	461	35
3	47	A	12.909	1	2550	2550	290	A-A	light	search	A	A	searchA	15	881.817	833.772	816	790	17
3	48	A	22.3807	1	4839	4839	224	A-A	light	search	A	A	searchA	16	522.484	272.252	444	224	28
3	49	A	7.5047	1	2253	2253	289	A-A	light	test	A	A	testA-A	1	704.653	323.299	635	289	5
3	50	A	NA	0	timeout	20000	130	A-A	light	test	A	A	testA-A	2	NA	NA	130	505	3
3	51	A	55.6323	1	4815	4815	153	A-A	light	test	A	A	testA-A	3	1492.38	921.854	1471	927	39
3	52	A	5.614	1	3812	3812	312	A-A	light	test	A	A	testA-A	4	1646.52	349.323	1584	312	1
3	53	A	13.8581	1	2474	2474	325	A-A	light	test	A	A	testA-A	5	1330.23	775.718	1258	755	16
3	54	A	19.6436	1	6530	6530	227	A-A	light	test	A	A	testA-A	6	1232.14	903.837	1171	853	52
3	55	A	19.2621	1	4173	4173	416	A-A	light	test	A	A	testA-A	7	493.457	712.66	438	664	45
3	56	A	15.5437	1	3275	3275	288	A-A	light	test	A	A	testA-A	8	1305.21	335.31	1242	288	7
3	57	A	16.1459	1	4400	4400	338	A-A	light	test	A	A	testA-A	9	776.719	774.717	698	742	11
3	58	A	10.367	1	2905	2905	230	A-A	light	test	A	A	testA-A	10	1242.15	271.251	1175	230	12
3	59	A	17.6657	1	1883	1883	345	A-A	light	test	A	A	testA-A	11	425.394	416.385	345	380	13
3	60	A	35.3091	1	2087	2087	237	A-A	light	test	A	A	testA-A	12	1352.25	901.835	1267	843	44
3	61	A	35.1147	1	4772	4772	345	A-A	light	test	A	A	testA-A	13	389.361	546.506	345	485	8
3	62	A	8.675	1	6082	6082	112	A-A	light	test	A	A	testA-A	14	469.435	140.13	414	112	25
3	63	A	14.6298	1	2181	2181	325	A-A	light	test	A	A	testA-A	15	1642.52	345.32	1570	325	57
3	64	A	14.9571	1	1737	1737	136	A-A	light	test	A	A	testA-A	16	1581.46	160.148	1531	136	17
4	1	A	16.5605	1	4011	4011	499	A-A	dark	learning	A	A	learning	1	581	545	510	499	42
4	2	B	18.554	1	4437	4437	298	A-A	dark	learning	A	A	learning	2	379	730	298	694	4
4	3	A	17.3566	1	4178	4178	359	A-A	dark	learning	A	A	learning	3	1312	749	1266	721	30
4	4	B	10.6888	1	1376	1376	421	A-A	dark	learning	A	A	learning	4	789	463	724	421	52
4	5	A	7.8262	1	3466	3466	310	A-A	dark	learning	A	A	learning	5	1666	739	1610	711	24
4	6	B	14.3265	1	1571	1571	331	A-A	dark	learning	A	A	learning	6	915	793	845	749	28
4	7	B	15.9452	1	2585	2585	154	A-A	dark	learning	A	A	learning	7	598	968	523	926	44
4	8	A	17.7553	1	9816	9816	483	A-A	dark	learning	A	A	learning	8	561	550	483	509	40
4	9	B	4.6098	1	2885	2885	302	A-A	dark	learning	A	A	learning	9	1680	507	1618	480	16
4	10	A	10.0623	1	1924	1924	202	A-A	dark	learning	A	A	learning	10	1240	914	1168	878	5
4	11	A	11.9269	1	9890	9890	111	A-A	dark	learning	A	A	learning	11	1026	149	953	111	39
4	12	B	13.6473	1	2948	2948	248	A-A	dark	learning	A	A	learning	12	1089	877	1024	832	56
4	13	B	16.5303	1	3300	3300	211	A-A	dark	learning	A	A	learning	13	1574	259	1512	211	41
4	14	A	3.6401	1	1347	1347	172	A-A	dark	learning	A	A	learning	14	591	207	527	172	33
4	15	B	13.1244	1	2038	2038	236	A-A	dark	learning	A	A	learning	15	657	280	590	236	53
4	16	A	10.1119	1	5252	5252	154	A-A	dark	learning	A	A	learning	16	978	959	905	926	18
4	17	A	14.8071	1	14941	14941	319	A-A	dark	learning	A	A	learning	17	1307	365	1241	319	21
4	18	B	11.2361	1	1406	1406	435	A-A	dark	learning	A	A	learning	18	1554	466	1485	444	13
4	19	B	19.8305	1	2407	2407	311	A-A	dark	learning	A	A	learning	19	1519	359	1467	311	8
4	20	A	8.3217	1	1161	1161	353	A-A	dark	learning	A	A	learning	20	1227	389	1171	353	35
4	21	B	10.2591	1	1103	1103	160	A-A	dark	learning	A	A	learning	21	1474	199	1418	160	25
4	22	A	20.1804	1	2303	2303	414	A-A	dark	learning	A	A	learning	22	1416	711	1338	666	51
4	23	B	7.6322	1	1815	1815	450	A-A	dark	learning	A	A	learning	23	634	668	567	630	48
4	24	A	19.1638	1	3631	3631	452	A-A	dark	learning	A	A	learning	24	840	502	772	452	32
4	25	B	20.8866	1	2163	2163	536	A-A	dark	learning	A	A	learning	25	664	596	597	544	46
4	26	A	26.1964	1	1553	1553	179	A-A	dark	learning	A	A	learning	26	1087	236	1030	179	17
4	27	B	2.0616	1	2180	2180	128	A-A	dark	learning	A	A	learning	27	193	912	128	881	37
4	28	A	NA	0	timeout	20000	254	A-A	dark	learning	A	A	learning	28	NA	NA	326	254	3
4	29	B	8.5586	1	3226	3226	215	A-A	dark	learning	A	A	learning	29	1676	255	1614	215	38
4	30	A	26.1964	1	1933	1933	255	A-A	dark	learning	A	A	learning	30	324	417	255	360	45
4	31	B	21.36	1	1901	1901	363	A-A	dark	learning	A	A	learning	31	432	682	363	630	50
4	32	A	16.3783	1	3735	3735	402	A-A	dark	learning	A	A	learning	32	1170	718	1093	678	19
4	33	A	12.5399	1	3243	3243	473	A-A	dark	search	A	A	searchA	1	634	516	576	473	38
4	34	A	12.5399	1	13649	13649	311	A-A	dark	search	A	A	searchA	2	529	354	471	311	7
4	35	A	1.118	1	2895	2895	498	A-A	dark	search	A	A	searchA	3	1235	530	1173	498	34
4	36	A	15.0748	1	19687	19687	201	A-A	dark	search	A	A	searchA	4	1289	231	1241	201	37
4	37	A	NA	0	timeout	20000	169	A-A	dark	search	A	A	searchA	5	NA	NA	169	423	41
4	38	A	16.6208	1	2889	2889	312	A-A	dark	search	A	A	searchA	6	1658	359	1601	312	16
4	39	A	22.0057	1	2582	2582	241	A-A	dark	search	A	A	searchA	7	509	891	454	839	48
4	40	A	22.3439	1	7765	7765	422	A-A	dark	search	A	A	searchA	8	1130	675	1050	658	9
4	41	A	5.4083	1	3208	3208	103	A-A	dark	search	A	A	searchA	9	1026	139	960	103	50
4	42	A	21.1009	1	16718	16718	388	A-A	dark	search	A	A	searchA	10	695	432	649	388	55
4	43	A	4.717	1	3783	3783	402	A-A	dark	search	A	A	searchA	11	1483	431	1416	402	45
4	44	A	11.2361	1	2134	2134	445	A-A	dark	search	A	A	searchA	12	687	487	628	445	10
4	45	A	NA	0	timeout	20000	280	A-A	dark	search	A	A	searchA	13	NA	NA	471	280	20
4	46	A	11.5	1	4151	4151	175	A-A	dark	search	A	A	searchA	14	1677	218	1614	175	28
4	47	A	9.7082	1	1593	1593	409	A-A	dark	search	A	A	searchA	15	1225	712	1160	671	31
4	48	A	14.8408	1	2405	2405	200	A-A	dark	search	A	A	searchA	16	849	244	778	200	19
4	49	A	19.1377	1	2390	2390	239	A-A	dark	test	A	A	testA-A	1	452	879	371	841	12
4	50	A	18.0347	1	2123	2123	513	A-A	dark	test	A	A	testA-A	2	667	557	591	513	29
4	51	A	26.3865	1	2680	2680	278	A-A	dark	test	A	A	testA-A	3	353	841	278	786	50
4	52	A	7.0178	1	5605	5605	513	A-A	dark	test	A	A	testA-A	4	613	544	543	513	6
4	53	A	20.9344	1	4746	4746	115	A-A	dark	test	A	A	testA-A	5	229	160	150	115	4
4	54	A	6.8007	1	5188	5188	242	A-A	dark	test	A	A	testA-A	6	1620	279	1553	242	52
4	55	A	1.118	1	8166	8166	400	A-A	dark	test	A	A	testA-A	7	553	712	489	680	41
4	56	A	19.6787	1	3976	3976	460	A-A	dark	test	A	A	testA-A	8	729	509	675	460	11
4	57	A	29.0043	1	8472	8472	207	A-A	dark	test	A	A	testA-A	9	447	262	367	207	2
4	58	A	17.557	1	1665	1665	438	A-A	dark	test	A	A	testA-A	10	1411	486	1354	438	16
4	59	A	9.7082	1	1946	1946	494	A-A	dark	test	A	A	testA-A	11	1491	616	1426	575	57
4	60	A	12.5	1	3152	3152	250	A-A	dark	test	A	A	testA-A	12	1546	865	1471	830	30
4	61	A	16.5	1	1194	1194	409	A-A	dark	test	A	A	testA-A	13	894	457	831	409	40
4	62	A	7.1589	1	5878	5878	421	A-A	dark	test	A	A	testA-A	14	1431	692	1361	659	43
4	63	A	10.1119	1	3953	3953	69	A-A	dark	test	A	A	testA-A	15	204	99	131	69	24
4	64	A	24.5815	1	7391	7391	370	A-A	dark	test	A	A	testA-A	16	1422	426	1357	370	32
5	1	A	28.2002	1	9150	9150	207	A-A	light	learning	A	A	learning	1	287	555	207	546	14
5	2	A	15.6605	1	6424	6424	133	A-A	light	learning	A	A	learning	2	598	983	520	947	25
5	3	B	6.1847	1	2264	2264	368	A-A	light	learning	A	A	learning	3	778	745	721	712	24
5	4	B	11.8849	1	1652	1652	533	A-A	light	learning	A	A	learning	4	1415	553	1349	533	55
5	5	B	20.0062	1	3284	3284	127	A-A	light	learning	A	A	learning	5	443	985	360	953	13
5	6	A	12.2577	1	10469	10469	98	A-A	light	learning	A	A	learning	6	945	132	870	98	36
5	7	A	23.3077	1	3489	3489	285	A-A	light	learning	A	A	learning	7	735	805	681	795	54
5	8	B	5.2202	1	3916	3916	140	A-A	light	learning	A	A	learning	8	1373	970	1315	940	7
5	9	A	13.8654	1	5225	5225	308	A-A	light	learning	A	A	learning	9	377	786	308	767	28
5	10	B	24.1506	1	6104	6104	394	A-A	light	learning	A	A	learning	10	840	447	766	394	43
5	11	B	18.7417	1	1880	1880	88	A-A	light	learning	A	A	learning	11	253	138	187	88	2
5	12	A	9.0139	1	4987	4987	366	A-A	light	learning	A	A	learning	12	1266	737	1206	714	48
5	13	B	22.5887	1	3028	3028	191	A-A	light	learning	A	A	learning	13	274	701	191	659	37
5	14	B	3.6401	1	3558	3558	293	A-A	light	learning	A	A	learning	14	1691	683	1627	648	44
5	15	A	14.0801	1	5019	5019	309	A-A	light	learning	A	A	learning	15	1646	801	1569	771	32
5	16	A	6.0208	1	7404	7404	153	A-A	light	learning	A	A	learning	16	1215	954	1156	927	9
5	17	A	20.2299	1	3080	3080	214	A-A	light	learning	A	A	learning	17	290	756	214	709	42
5	18	A	3.3541	1	5947	5947	392	A-A	light	learning	A	A	learning	18	458	592	392	562	30
5	19	B	24.1919	1	4052	4052	273	A-A	light	learning	A	A	learning	19	1405	846	1365	807	3
5	20	B	6.1033	1	2294	2294	381	A-A	light	learning	A	A	learning	20	519	416	461	381	52
5	21	A	20.4022	1	3819	3819	261	A-A	light	learning	A	A	learning	21	849	312	780	261	56
5	22	A	2.5	1	4262	4262	254	A-A	light	learning	A	A	learning	22	1307	859	1246	826	39
5	23	B	20.1308	1	2954	2954	391	A-A	light	learning	A	A	learning	23	1504	442	1446	391	46
5	24	B	38.461	1	1867	1867	399	A-A	light	learning	A	A	learning	24	526	465	446	399	19
5	25	A	4.0311	1	11599	11599	444	A-A	light	learning	A	A	learning	25	728	667	661	636	50
5	26	A	31.6425	1	3437	3437	333	A-A	light	learning	A	A	learning	26	401	381	365	333	31
5	27	B	20.1308	1	9737	9737	418	A-A	light	learning	A	A	learning	27	1222	674	1154	662	4
5	28	B	24.6221	1	2054	2054	157	A-A	light	learning	A	A	learning	28	230	239	157	185	41
5	29	B	5.5	1	2600	2600	258	A-A	light	learning	A	A	learning	29	1073	295	1010	258	57
5	30	A	18.2003	1	4326	4326	69	A-A	light	learning	A	A	learning	30	276	107	196	69	12
5	31	B	26.5	1	1383	1383	324	A-A	light	learning	A	A	learning	31	1028	378	951	324	8
5	32	A	39.1567	1	13658	13658	376	A-A	light	learning	A	A	learning	32	1646	574	1544	546	6
5	33	A	9.6047	1	1643	1643	357	A-A	light	search	A	A	searchA	1	414	512	357	473	53
5	34	A	6.0208	1	3112	3112	306	A-A	light	search	A	A	searchA	2	1335	337	1266	306	10
5	35	A	26.5189	1	2058	2058	166	A-A	light	search	A	A	searchA	3	557	964	513	914	27
5	36	A	15.6605	1	2373	2373	389	A-A	light	search	A	A	searchA	4	1529	425	1481	389	26
5	37	A	11.6297	1	1892	1892	474	A-A	light	search	A	A	searchA	5	1145	516	1087	474	2
5	38	A	9.5525	1	4086	4086	502	A-A	light	search	A	A	searchA	6	622	616	552	578	1
5	39	A	23.2863	1	1056	1056	418	A-A	light	search	A	A	searchA	7	796	472	727	418	5
5	40	A	9.6047	1	3488	3488	348	A-A	light	search	A	A	searchA	8	1556	387	1487	348	9
5	41	A	31.4682	1	1655	1655	350	A-A	light	search	A	A	searchA	9	443	718	350	677	36
5	42	A	15.0416	1	957	957	505	A-A	light	search	A	A	searchA	10	1011	551	944	505	57
5	43	A	15.2398	1	1843	1843	421	A-A	light	search	A	A	searchA	11	1357	679	1304	659	21
5	44	A	21.5928	1	1992	1992	418	A-A	light	search	A	A	searchA	12	896	708	849	662	29
5	45	A	40.5123	1	2547	2547	434	A-A	light	search	A	A	searchA	13	625	717	571	646	56
5	46	A	10.5475	1	2475	2475	441	A-A	light	search	A	A	searchA	14	1510	467	1438	441	39
5	47	A	13.4629	1	1150	1150	447	A-A	light	search	A	A	searchA	15	1203	677	1135	633	19
5	48	A	14.3265	1	1870	1870	93	A-A	light	search	A	A	searchA	16	913	137	843	93	50
5	49	A	23.9426	1	3162	3162	377	A-A	light	test	A	A	testA-A	1	531	723	447	703	29
5	50	A	8.0156	1	1149	1149	490	A-A	light	test	A	A	testA-A	2	971	621	916	590	34
5	51	A	5.5	1	2355	2355	414	A-A	light	test	A	A	testA-A	3	516	703	453	666	18
5	52	A	24.8244	1	1593	1593	422	A-A	light	test	A	A	testA-A	4	841	714	782	658	50
5	53	A	12.3794	1	1485	1485	356	A-A	light	test	A	A	testA-A	5	712	396	658	356	45
5	54	A	5.5902	1	16621	16621	203	A-A	light	test	A	A	testA-A	6	1724	237	1656	203	23
5	55	A	42.1574	1	3962	3962	374	A-A	light	test	A	A	testA-A	7	1565	714	1537	706	11
5	56	A	12.0934	1	1837	1837	138	A-A	light	test	A	A	testA-A	8	1603	171	1528	138	39
5	57	A	21.1009	1	3317	3317	414	A-A	light	test	A	A	testA-A	9	482	467	414	415	38
5	58	A	11.4127	1	3420	3420	438	A-A	light	test	A	A	testA-A	10	603	679	550	642	49
5	59	A	44.0596	1	1758	1758	232	A-A	light	test	A	A	testA-A	11	334	426	232	374	33
5	60	A	19.0066	1	1234	1234	450	A-A	light	test	A	A	testA-A	12	551	662	469	630	4
5	61	A	60.1519	1	4399	4399	305	A-A	light	test	A	A	testA-A	13	1663	833	1546	775	1
5	62	A	21.4767	1	2811	2811	210	A-A	light	test	A	A	testA-A	14	877	882	823	870	52
5	63	A	15.2069	1	3327	3327	244	A-A	light	test	A	A	testA-A	15	1102	857	1028	836	8
5	64	A	43.6033	1	1206	1206	488	A-A	light	test	A	A	testA-A	16	895	563	829	488	12
6	1	A	20.8147	1	3338	3338	244	A-A	dark	learning	A	A	learning	1	288	429	244	389	5
6	2	B	35.5563	1	1064	1064	328	A-A	dark	learning	A	A	learning	2	973	344	942	328	56
6	3	A	35.7246	1	2577	2577	357	A-A	dark	learning	A	A	learning	3	477	413	440	357	9
6	4	B	27.5726	1	2363	2363	115	A-A	dark	learning	A	A	learning	4	1635	174	1570	115	12
6	5	B	31.8944	1	1120	1120	375	A-A	dark	learning	A	A	learning	5	966	729	934	705	19
6	6	B	10.5475	1	3656	3656	302	A-A	dark	learning	A	A	learning	6	1140	804	1086	778	22
6	7	A	7.433	1	1268	1268	280	A-A	dark	learning	A	A	learning	7	848	306	780	280	41
6	8	A	20.8626	1	3079	3079	157	A-A	dark	learning	A	A	learning	8	235	616	157	570	35
6	9	B	6.8007	1	1024	1024	514	A-A	dark	learning	A	A	learning	9	1129	552	1064	514	38
6	10	B	27.7894	1	4312	4312	260	A-A	dark	learning	A	A	learning	10	1412	319	1345	260	3
6	11	A	40.215	1	3710	3710	319	A-A	dark	learning	A	A	learning	11	1311	382	1273	319	23
6	12	A	25.5392	1	1730	1730	215	A-A	dark	learning	A	A	learning	12	563	920	490	865	40
6	13	B	14.5	1	1638	1638	193	A-A	dark	learning	A	A	learning	13	1204	933	1141	887	42
6	14	A	31.7844	1	2042	2042	145	A-A	dark	learning	A	A	learning	14	178	438	145	396	16
6	15	A	20.4022	1	1151	1151	287	A-A	dark	learning	A	A	learning	15	1206	335	1155	287	24
6	16	B	16.1941	1	1617	1617	308	A-A	dark	learning	A	A	learning	16	1208	806	1161	772	31
6	17	B	13.2004	1	2003	2003	308	A-A	dark	learning	A	A	learning	17	891	814	836	772	32
6	18	A	22.0511	1	1970	1970	184	A-A	dark	learning	A	A	learning	18	1209	217	1124	184	14
6	19	A	34.3402	1	2766	2766	275	A-A	dark	learning	A	A	learning	19	1675	505	1645	464	25
6	20	B	5.5902	1	1212	1212	483	A-A	dark	learning	A	A	learning	20	864	626	806	597	30
6	21	B	9.9624	1	1698	1698	382	A-A	dark	learning	A	A	learning	21	1579	423	1519	382	45
6	22	B	5.3151	1	1611	1611	289	A-A	dark	learning	A	A	learning	22	1023	324	964	289	7
6	23	A	23.0489	1	11323	11323	480	A-A	dark	learning	A	A	learning	23	693	654	625	600	50
6	24	A	19.3197	1	3387	3387	101	A-A	dark	learning	A	A	learning	24	234	136	152	101	54
6	25	A	49.3584	1	1349	1349	401	A-A	dark	learning	A	A	learning	25	728	464	627	401	13
6	26	A	6.5765	1	2481	2481	320	A-A	dark	learning	A	A	learning	26	952	798	888	760	51
6	27	B	27.5	1	3925	3925	97	A-A	dark	learning	A	A	learning	27	1338	145	1297	97	53
6	28	B	28.5	1	2685	2685	432	A-A	dark	learning	A	A	learning	28	807	708	744	648	8
6	29	B	13.4629	1	2605	2605	231	A-A	dark	learning	A	A	learning	29	796	892	740	849	52
6	30	A	12.5399	1	2049	2049	214	A-A	dark	learning	A	A	learning	30	1023	909	955	866	15
6	31	B	34.0771	1	1414	1414	426	A-A	dark	learning	A	A	learning	31	544	489	468	426	43
6	32	A	23.6907	1	3920	3920	193	A-A	dark	learning	A	A	learning	32	1422	241	1376	193	55
6	33	A	16.7705	1	2025	2025	218	A-A	dark	search	A	A	searchA	1	789	242	711	218	32
6	34	A	36.8001	1	5518	5518	131	A-A	dark	search	A	A	searchA	2	216	899	131	838	39
6	35	A	16.8003	1	1483	1483	354	A-A	dark	search	A	A	searchA	3	683	399	610	354	56
6	36	A	31.8159	1	4092	4092	367	A-A	dark	search	A	A	searchA	4	893	772	814	713	41
6	37	A	12.2984	1	3317	3317	418	A-A	dark	search	A	A	searchA	5	1131	699	1079	662	16
6	38	A	26.5	1	1712	1712	233	A-A	dark	search	A	A	searchA	6	752	287	675	233	37
6	39	A	NA	0	timeout	20000	401	A-A	dark	search	A	A	searchA	7	NA	NA	624	401	12
6	40	A	6.265	1	2360	2360	355	A-A	dark	search	A	A	searchA	8	415	598	355	561	13
6	41	A	7.433	1	1626	1626	178	A-A	dark	search	A	A	searchA	9	400	212	344	178	55
6	42	A	13.8654	1	1973	1973	219	A-A	dark	search	A	A	searchA	10	682	905	625	861	30
6	43	A	24.8847	1	3481	3481	398	A-A	dark	search	A	A	searchA	11	1552	420	1512	398	49
6	44	A	19.5256	1	4426	4426	536	A-A	dark	search	A	A	searchA	12	1198	548	1136	536	35
6	45	A	29.0043	1	3451	3451	249	A-A	dark	search	A	A	searchA	13	383	886	337	831	24
6	46	A	25.224	1	3310	3310	265	A-A	dark	search	A	A	searchA	14	1129	321	1072	265	47
6	47	A	25.1645	1	1570	1570	152	A-A	dark	search	A	A	searchA	15	234	368	152	320	1
6	48	A	16.1941	1	14634	14634	377	A-A	dark	search	A	A	searchA	16	1622	598	1543	564	23
6	49	A	30.7612	1	11765	11765	104	A-A	dark	test	A	A	testA-A	1	1426	105	1367	104	4
6	50	A	26.1008	1	8101	8101	102	A-A	dark	test	A	A	testA-A	2	1666	118	1624	102	55
6	51	A	20.67	1	7749	7749	238	A-A	dark	test	A	A	testA-A	3	290	490	238	476	12
6	52	A	42.5	1	2338	2338	341	A-A	dark	test	A	A	testA-A	4	1608	647	1579	590	28
6	53	A	11.2361	1	2351	2351	205	A-A	dark	test	A	A	testA-A	5	262	549	205	508	1
6	54	A	14.2215	1	3756	3756	236	A-A	dark	test	A	A	testA-A	6	964	878	915	844	22
6	55	A	28.6575	1	2809	2809	428	A-A	dark	test	A	A	testA-A	7	1382	712	1322	652	35
6	56	A	65.9337	1	1799	1799	296	A-A	dark	test	A	A	testA-A	8	338	398	296	304	51
6	57	A	12.816	1	954	954	320	A-A	dark	test	A	A	testA-A	9	692	347	641	320	45
6	58	A	36.6231	1	1138	1138	216	A-A	dark	test	A	A	testA-A	10	1293	267	1261	216	56
6	59	A	11.8004	1	1643	1643	198	A-A	dark	test	A	A	testA-A	11	497	220	441	198	23
6	60	A	39.246	1	9460	9460	202	A-A	dark	test	A	A	testA-A	12	799	877	714	878	47
6	61	A	38.2655	1	1740	1740	321	A-A	dark	test	A	A	testA-A	13	1547	786	1522	759	15
6	62	A	18.0624	1	1110	1110	484	A-A	dark	test	A	A	testA-A	14	929	641	878	596	24
6	63	A	46.7787	1	6122	6122	326	A-A	dark	test	A	A	testA-A	15	1077	366	1060	326	8
6	64	A	20.3039	1	2172	2172	230	A-A	dark	test	A	A	testA-A	16	642	258	599	230	18
7	1	B	20.5973	1	5109	5109	357	A-A	light	learning	A	A	learning	1	1375	409	1314	357	9
7	2	B	19.7294	1	1992	1992	420	A-A	light	learning	A	A	learning	2	1136	471	1076	420	2
7	3	A	17.5285	1	1194	1194	424	A-A	light	learning	A	A	learning	3	1014	473	952	424	48
7	4	A	28.64	1	2043	2043	212	A-A	light	learning	A	A	learning	4	858	271	787	212	17
7	5	A	15.2069	1	10330	10330	374	A-A	light	learning	A	A	learning	5	449	416	375	374	31
7	6	B	14.3265	1	1912	1912	280	A-A	light	learning	A	A	learning	6	350	645	280	601	7
7	7	A	6.7268	1	2398	2398	347	A-A	light	learning	A	A	learning	7	1641	763	1573	727	6
7	8	B	19.3197	1	1513	1513	326	A-A	light	learning	A	A	learning	8	1246	354	1164	326	38
7	9	A	29.3471	1	1092	1092	354	A-A	light	learning	A	A	learning	9	833	406	749	354	32
7	10	B	12.5399	1	2345	2345	159	A-A	light	learning	A	A	learning	10	300	964	232	921	56
7	11	B	18.527	1	1248	1248	227	A-A	light	learning	A	A	learning	11	484	903	420	853	13
7	12	A	26.2155	1	1718	1718	258	A-A	light	learning	A	A	learning	12	1281	875	1233	822	14
7	13	B	18.3098	1	1593	1593	306	A-A	light	learning	A	A	learning	13	973	348	895	306	25
7	14	A	7.433	1	1345	1345	225	A-A	light	learning	A	A	learning	14	716	889	646	855	30
7	15	B	17.4141	1	2522	2522	129	A-A	light	learning	A	A	learning	15	757	996	705	951	50
7	16	A	30.2035	1	7875	7875	234	A-A	light	learning	A	A	learning	16	1420	294	1367	234	43
7	17	A	4.0311	1	1332	1332	353	A-A	light	learning	A	A	learning	17	700	384	633	353	34
7	18	A	12.5399	1	1593	1593	267	A-A	light	learning	A	A	learning	18	331	628	267	584	3
7	19	B	9.0139	1	1236	1236	377	A-A	light	learning	A	A	learning	19	1138	417	1078	377	8
7	20	B	23.2648	1	1083	1083	305	A-A	light	learning	A	A	learning	20	819	357	745	305	36
7	21	A	11.7154	1	1014	1014	526	A-A	light	learning	A	A	learning	21	1120	550	1048	526	33
7	22	B	32.1753	1	1760	1760	430	A-A	light	learning	A	A	learning	22	975	699	885	650	19
7	23	B	42.2995	1	9670	9670	235	A-A	light	learning	A	A	learning	23	275	394	235	327	39
7	24	A	12.0934	1	1370	1370	335	A-A	light	learning	A	A	learning	24	868	377	811	335	52
7	25	A	7.433	1	1384	1384	278	A-A	light	learning	A	A	learning	25	1342	836	1272	802	11
7	26	B	25.8118	1	3050	3050	160	A-A	light	learning	A	A	learning	26	493	933	412	920	37
7	27	A	34.2235	1	2805	2805	139	A-A	light	learning	A	A	learning	27	387	156	293	139	57
7	28	B	28.324	1	1116	1116	305	A-A	light	learning	A	A	learning	28	1132	363	1059	305	27
7	29	B	13.1244	1	1775	1775	264	A-A	light	learning	A	A	learning	29	1692	308	1633	264	53
7	30	A	9.7082	1	2687	2687	516	A-A	light	learning	A	A	learning	30	1322	557	1261	516	21
7	31	B	15.9765	1	2692	2692	385	A-A	light	learning	A	A	learning	31	1583	642	1535	605	46
7	32	A	23.9635	1	4235	4235	189	A-A	light	learning	A	A	learning	32	1625	932	1584	891	24
7	33	A	8.5	1	3596	3596	190	A-A	light	search	A	A	searchA	1	834	929	775	890	31
7	34	A	4.9244	1	14157	14157	164	A-A	light	search	A	A	searchA	2	289	952	228	916	48
7	35	A	18.527	1	3072	3072	327	A-A	light	search	A	A	searchA	3	1643	803	1579	753	15
7	36	A	23.585	1	3337	3337	407	A-A	light	search	A	A	searchA	4	876	462	815	407	43
7	37	A	22.8965	1	19182	19182	291	A-A	light	search	A	A	searchA	5	342	823	291	772	3
7	38	A	21.006	1	9201	9201	328	A-A	light	search	A	A	searchA	6	1407	783	1365	752	25
7	39	A	31.7057	1	1290	1290	392	A-A	light	search	A	A	searchA	7	480	691	392	640	57
7	40	A	23.0489	1	3237	3237	458	A-A	light	search	A	A	searchA	8	1244	671	1196	622	27
7	41	A	12.7769	1	16975	16975	463	A-A	light	search	A	A	searchA	9	842	642	790	617	20
7	42	A	18.5809	1	1054	1054	446	A-A	light	search	A	A	searchA	10	937	658	891	634	16
7	43	A	15.2398	1	5248	5248	178	A-A	light	search	A	A	searchA	11	1618	945	1565	902	26
7	44	A	24.8646	1	7577	7577	314	A-A	light	search	A	A	searchA	12	1645	705	1606	667	37
7	45	A	12.0934	1	1069	1069	419	A-A	light	search	A	A	searchA	13	872	461	803	419	56
7	46	A	4.6098	1	1415	1415	411	A-A	light	search	A	A	searchA	14	1358	447	1294	411	18
7	47	A	NA	0	timeout	20000	359	A-A	light	search	A	A	searchA	15	NA	NA	359	378	36
7	48	A	22.9837	1	14322	14322	325	A-A	light	search	A	A	searchA	16	404	438	325	423	23
7	49	A	23.9635	1	1716	1716	209	A-A	light	test	A	A	testA-A	1	294	656	209	615	36
7	50	A	19.5256	1	1389	1389	434	A-A	light	test	A	A	testA-A	2	1484	690	1436	646	15
7	51	A	4.6098	1	4393	4393	149	A-A	light	test	A	A	testA-A	3	385	958	323	931	52
7	52	A	47.6681	1	2610	2610	256	A-A	light	test	A	A	testA-A	4	1570	903	1503	824	11
7	53	A	15.4029	1	15790	15790	81	A-A	light	test	A	A	testA-A	5	981	125	909	81	49
7	54	A	43.6835	1	2437	2437	268	A-A	light	test	A	A	testA-A	6	355	730	268	735	57
7	55	A	15.4029	1	2980	2980	101	A-A	light	test	A	A	testA-A	7	404	136	326	101	48
7	56	A	28.0401	1	1433	1433	471	A-A	light	test	A	A	testA-A	8	1486	647	1449	605	50
7	57	A	21.5232	1	1791	1791	234	A-A	light	test	A	A	testA-A	9	517	896	443	846	23
7	58	A	39.3224	1	1079	1079	359	A-A	light	test	A	A	testA-A	10	753	429	682	359	28
7	59	A	18.9275	1	6457	6457	373	A-A	light	test	A	A	testA-A	11	1275	720	1208	707	20
7	60	A	16.2865	1	5689	5689	345	A-A	light	test	A	A	testA-A	12	971	751	913	735	35
7	61	A	34.0918	1	1164	1164	527	A-A	light	test	A	A	testA-A	13	1408	582	1311	553	37
7	62	A	17.9513	1	1751	1751	239	A-A	light	test	A	A	testA-A	14	755	890	688	841	8
7	63	A	21.4767	1	5758	5758	219	A-A	light	test	A	A	testA-A	15	876	255	792	219	4
7	64	A	23.4361	1	4551	4551	269	A-A	light	test	A	A	testA-A	16	701	320	625	269	44
8	1	B	7.6322	1	8458	8458	137	A-A	dark	learning	A	A	learning	1	245	968	186	943	32
8	2	B	12.0934	1	5254	5254	265	A-A	dark	learning	A	A	learning	2	1054	845	1003	815	11
8	3	A	38.1215	1	1850	1850	342	A-A	dark	learning	A	A	learning	3	1558	806	1506	738	57
8	4	A	17.6139	1	3428	3428	65	A-A	dark	learning	A	A	learning	4	1423	114	1362	65	19
8	5	A	22.2767	1	5533	5533	342	A-A	dark	learning	A	A	learning	5	648	754	569	738	54
8	6	B	10.9659	1	5045	5045	539	A-A	dark	learning	A	A	learning	6	1427	575	1374	539	3
8	7	A	41.2098	1	8513	8513	322	A-A	dark	learning	A	A	learning	7	1300	823	1213	758	17
8	8	B	6.5	1	3955	3955	304	A-A	dark	learning	A	A	learning	8	560	333	503	304	27
8	9	A	10.0125	1	3699	3699	376	A-A	dark	learning	A	A	learning	9	509	407	436	376	45
8	10	B	13.0096	1	2385	2385	243	A-A	dark	learning	A	A	learning	10	375	274	325	243	16
8	11	A	20.9344	1	4007	4007	98	A-A	dark	learning	A	A	learning	11	555	116	508	98	56
8	12	B	1.118	1	11984	11984	64	A-A	dark	learning	A	A	learning	12	1256	96	1194	64	53
8	13	A	19.4743	1	2272	2272	274	A-A	dark	learning	A	A	learning	13	473	847	427	806	15
8	14	A	18.9011	1	17451	17451	513	A-A	dark	learning	A	A	learning	14	661	556	613	513	42
8	15	B	5.2202	1	2356	2356	200	A-A	dark	learning	A	A	learning	15	392	910	324	880	50
8	16	B	20.1556	1	5508	5508	299	A-A	dark	learning	A	A	learning	16	1359	831	1288	781	23
8	17	B	17.6139	1	1274	1274	239	A-A	dark	learning	A	A	learning	17	1275	285	1222	239	25
8	18	A	10.1119	1	13957	13957	182	A-A	dark	learning	A	A	learning	18	1256	928	1203	898	37
8	19	A	22.5222	1	3062	3062	322	A-A	dark	learning	A	A	learning	19	408	376	346	322	28
8	20	B	45.7739	1	2388	2388	109	A-A	dark	learning	A	A	learning	20	1328	183	1282	109	22
8	21	A	15.5	1	5265	5265	237	A-A	dark	learning	A	A	learning	21	300	431	237	384	4
8	22	B	27.6089	1	1156	1156	78	A-A	dark	learning	A	A	learning	22	613	132	566	78	6
8	23	A	20.8866	1	4387	4387	241	A-A	dark	learning	A	A	learning	23	1233	891	1174	839	10
8	24	B	3.5	1	1838	1838	171	A-A	dark	learning	A	A	learning	24	234	211	171	183	35
8	25	A	33.6341	1	2611	2611	253	A-A	dark	learning	A	A	learning	25	828	881	790	827	39
8	26	B	3.2016	1	1035	1035	147	A-A	dark	learning	A	A	learning	26	1437	176	1376	147	36
8	27	B	22.0737	1	3301	3301	191	A-A	dark	learning	A	A	learning	27	259	584	191	574	1
8	28	A	20.5244	1	7720	7720	314	A-A	dark	learning	A	A	learning	28	1643	366	1581	314	46
8	29	A	35.0892	1	5223	5223	275	A-A	dark	learning	A	A	learning	29	315	800	275	742	38
8	30	A	25.5783	1	3805	3805	259	A-A	dark	learning	A	A	learning	30	762	878	697	821	7
8	31	B	13.0096	1	1741	1741	261	A-A	dark	learning	A	A	learning	31	499	851	423	819	34
8	32	B	58.3374	1	16300	16300	164	A-A	dark	learning	A	A	learning	32	268	712	164	639	51
8	33	A	10.0125	1	2058	2058	229	A-A	dark	search	A	A	searchA	1	997	883	924	851	15
8	34	A	10.5475	1	1962	1962	414	A-A	dark	search	A	A	searchA	2	468	679	414	653	13
8	35	A	8.7321	1	1616	1616	223	A-A	dark	search	A	A	searchA	3	288	668	223	628	3
8	36	A	NA	0	timeout	20000	496	A-A	dark	search	A	A	searchA	4	NA	NA	1335	584	6
8	37	A	7.5664	1	1637	1637	295	A-A	dark	search	A	A	searchA	5	1091	319	1029	295	30
8	38	A	21.9146	1	3821	3821	213	A-A	dark	search	A	A	searchA	6	545	918	492	867	8
8	39	A	28.1114	1	15816	15816	263	A-A	dark	search	A	A	searchA	7	1622	292	1587	263	45
8	40	A	47.0771	1	6067	6067	138	A-A	dark	search	A	A	searchA	8	1159	1014	1120	942	12
8	41	A	8.7321	1	2275	2275	154	A-A	dark	search	A	A	searchA	9	313	954	242	926	9
8	42	A	18.5809	1	1837	1837	177	A-A	dark	search	A	A	searchA	10	257	808	177	769	2
8	43	A	NA	0	timeout	20000	481	A-A	dark	search	A	A	searchA	11	NA	NA	1405	481	46
8	44	A	NA	0	timeout	20000	298	A-A	dark	search	A	A	searchA	12	NA	NA	1622	353	31
8	45	A	15.3052	1	1264	1264	323	A-A	dark	search	A	A	searchA	13	893	364	842	323	25
8	46	A	7.5	1	1412	1412	320	A-A	dark	search	A	A	searchA	14	613	347	544	320	20
8	47	A	21.006	1	17595	17595	149	A-A	dark	search	A	A	searchA	15	199	507	149	459	33
8	48	A	0.5	1	1131	1131	335	A-A	dark	search	A	A	searchA	16	581	366	518	335	36
8	49	A	5.2202	1	6227	6227	190	A-A	dark	test	A	A	testA-A	1	825	223	767	190	11
8	50	A	18.5809	1	6974	6974	323	A-A	dark	test	A	A	testA-A	2	1551	347	1471	323	6
8	51	A	8.5	1	4670	4670	281	A-A	dark	test	A	A	testA-A	3	1436	320	1377	281	21
8	52	A	25.5783	1	3310	3310	221	A-A	dark	test	A	A	testA-A	4	282	352	221	295	43
8	53	A	29.7532	1	5295	5295	145	A-A	dark	test	A	A	testA-A	5	354	189	318	145	39
8	54	A	13.6473	1	5653	5653	296	A-A	dark	test	A	A	testA-A	6	371	746	296	721	18
8	55	A	29.2617	1	17401	17401	98	A-A	dark	test	A	A	testA-A	7	820	102	767	98	32
8	56	A	16.7705	1	1674	1674	418	A-A	dark	test	A	A	testA-A	8	665	466	605	418	4
8	57	A	19.7041	1	13556	13556	164	A-A	dark	test	A	A	testA-A	9	1109	207	1030	164	41
8	58	A	27.5545	1	1420	1420	179	A-A	dark	test	A	A	testA-A	10	461	216	425	179	52
8	59	A	24.5815	1	1109	1109	342	A-A	dark	test	A	A	testA-A	11	527	398	466	342	50
8	60	A	6.5765	1	1221	1221	122	A-A	dark	test	A	A	testA-A	12	485	160	421	122	53
8	61	A	16.225	1	2349	2349	442	A-A	dark	test	A	A	testA-A	13	675	683	603	638	14
8	62	A	5.4083	1	1371	1371	277	A-A	dark	test	A	A	testA-A	14	478	313	418	277	57
8	63	A	13.6473	1	6610	6610	268	A-A	dark	test	A	A	testA-A	15	1705	306	1630	268	7
8	64	A	21.1009	1	1586	1586	467	A-A	dark	test	A	A	testA-A	16	1235	511	1189	467	9
9	1	B	15.7877	1	2758	2758	262	A-A	light	learning	A	A	learning	1	1329	865	1269	818	31
9	2	A	29.1247	1	4746	4746	324	A-A	light	learning	A	A	learning	2	1402	384	1345	324	26
9	3	A	11.8849	1	12316	12316	276	A-A	light	learning	A	A	learning	3	790	847	730	804	46
9	4	B	26.8561	1	2719	2719	214	A-A	light	learning	A	A	learning	4	1683	270	1631	214	29
9	5	A	26.4433	1	6185	6185	295	A-A	light	learning	A	A	learning	5	814	842	758	785	12
9	6	B	22.0737	1	4223	4223	163	A-A	light	learning	A	A	learning	6	338	970	270	917	45
9	7	B	15.0748	1	1271	1271	430	A-A	light	learning	A	A	learning	7	1380	463	1302	430	20
9	8	A	27.5182	1	3553	3553	279	A-A	light	learning	A	A	learning	8	437	338	375	279	39
9	9	B	22.6108	1	3038	3038	370	A-A	light	learning	A	A	learning	9	1467	763	1411	710	16
9	10	A	30.104	1	1031	1031	507	A-A	light	learning	A	A	learning	10	590	564	507	510	53
9	11	B	11.9269	1	1399	1399	407	A-A	light	learning	A	A	learning	11	480	545	407	507	10
9	12	A	15.3379	1	8771	8771	276	A-A	light	learning	A	A	learning	12	1365	850	1307	804	44
9	13	B	22.809	1	1270	1270	398	A-A	light	learning	A	A	learning	13	483	450	410	398	56
9	14	A	2.0616	1	4796	4796	493	A-A	light	learning	A	A	learning	14	1244	618	1183	587	3
9	15	A	10.5475	1	3084	3084	269	A-A	light	learning	A	A	learning	15	652	837	598	811	55
9	16	B	19.5256	1	4371	4371	151	A-A	light	learning	A	A	learning	16	1561	202	1499	151	28
9	17	A	36.2802	1	1690	1690	357	A-A	light	learning	A	A	learning	17	438	428	357	365	6
9	18	A	18.8215	1	4776	4776	301	A-A	light	learning	A	A	learning	18	376	358	301	312	14
9	19	B	11.2361	1	2799	2799	219	A-A	light	learning	A	A	learning	19	416	260	359	219	8
9	20	B	19.6023	1	917	917	252	A-A	light	learning	A	A	learning	20	1193	299	1118	252	38
9	21	B	25.005	1	4399	4399	295	A-A	light	learning	A	A	learning	21	1499	816	1461	785	40
9	22	A	21.0297	1	1645	1645	446	A-A	light	learning	A	A	learning	22	1557	571	1474	546	54
9	23	A	6.8007	1	3369	3369	250	A-A	light	learning	A	A	learning	23	1440	856	1381	830	48
9	24	B	36.2802	1	1018	1018	470	A-A	light	learning	A	A	learning	24	1393	533	1312	470	9
9	25	B	15.2398	1	1334	1334	221	A-A	light	learning	A	A	learning	25	294	702	221	659	34
9	26	A	24.1299	1	1514	1514	330	A-A	light	learning	A	A	learning	26	1516	348	1433	330	5
9	27	A	4.272	1	4970	4970	135	A-A	light	learning	A	A	learning	27	900	975	833	945	51
9	28	B	25.5783	1	2658	2658	248	A-A	light	learning	A	A	learning	28	1068	889	1007	832	15
9	29	B	43.6835	1	966	966	299	A-A	light	learning	A	A	learning	29	853	367	766	299	27
9	30	B	32.3303	1	1440	1440	325	A-A	light	learning	A	A	learning	30	1675	468	1595	409	50
9	31	A	44.847	1	2221	2221	162	A-A	light	learning	A	A	learning	31	917	235	837	162	23
9	32	A	51.3639	1	3342	3342	109	A-A	light	learning	A	A	learning	32	643	179	546	109	24
9	33	A	39.6011	1	1793	1793	202	A-A	light	search	A	A	searchA	1	856	265	769	202	32
9	34	A	6.5	1	2046	2046	520	A-A	light	search	A	A	searchA	2	1463	575	1400	550	13
9	35	A	62.859	1	1445	1445	312	A-A	light	search	A	A	searchA	3	830	370	710	312	49
9	36	A	8.0777	1	3356	3356	329	A-A	light	search	A	A	searchA	4	1428	775	1368	751	56
9	37	A	5.3151	1	3974	3974	278	A-A	light	search	A	A	searchA	5	1670	830	1611	802	33
9	38	A	4.0311	1	1495	1495	468	A-A	light	search	A	A	searchA	6	1212	503	1151	468	17
9	39	A	11.0114	1	2417	2417	255	A-A	light	search	A	A	searchA	7	1041	856	989	825	18
9	40	A	23.585	1	1798	1798	139	A-A	light	search	A	A	searchA	8	1249	183	1166	139	24
9	41	A	5.2202	1	3299	3299	222	A-A	light	search	A	A	searchA	9	280	850	222	817	45
9	42	A	20.1804	1	3528	3528	242	A-A	light	search	A	A	searchA	10	324	856	276	838	55
9	43	A	2.0616	1	1420	1420	441	A-A	light	search	A	A	searchA	11	630	473	569	441	1
9	44	A	15.5322	1	1873	1873	269	A-A	light	search	A	A	searchA	12	1618	858	1556	811	39
9	45	A	22.0511	1	7515	7515	201	A-A	light	search	A	A	searchA	13	1030	892	955	879	25
9	46	A	31.8944	1	4653	4653	210	A-A	light	search	A	A	searchA	14	1546	273	1488	210	50
9	47	A	15.6285	1	1576	1576	410	A-A	light	search	A	A	searchA	15	1575	569	1510	522	15
9	48	A	13.1244	1	1638	1638	402	A-A	light	search	A	A	searchA	16	1102	718	1029	678	21
9	49	A	34.3402	1	4655	4655	111	A-A	light	test	A	A	testA-A	1	1615	168	1529	111	53
9	50	A	20.5	1	2576	2576	88	A-A	light	test	A	A	testA-A	2	780	140	717	88	37
9	51	A	17.9234	1	1013	1013	317	A-A	light	test	A	A	testA-A	3	1309	364	1237	317	45
9	52	A	48.8083	1	3845	3845	149	A-A	light	test	A	A	testA-A	4	242	707	149	637	20
9	53	A	23.8799	1	1347	1347	530	A-A	light	test	A	A	testA-A	5	1084	604	1013	550	40
9	54	A	9.5525	1	1695	1695	516	A-A	light	test	A	A	testA-A	6	1360	554	1304	516	33
9	55	A	22.3215	1	13040	13040	316	A-A	light	test	A	A	testA-A	7	1117	817	1048	764	44
9	56	A	11.5434	1	3140	3140	204	A-A	light	test	A	A	testA-A	8	548	904	496	876	22
9	57	A	43.6606	1	2889	2889	206	A-A	light	test	A	A	testA-A	9	779	280	706	206	29
9	58	A	12.855	1	1809	1809	87	A-A	light	test	A	A	testA-A	10	812	131	746	87	39
9	59	A	6.1847	1	1917	1917	377	A-A	light	test	A	A	testA-A	11	1414	736	1345	703	18
9	60	A	8.3217	1	1761	1761	221	A-A	light	test	A	A	testA-A	12	385	257	315	221	21
9	61	A	27.8792	1	8287	8287	203	A-A	light	test	A	A	testA-A	13	1529	258	1451	203	25
9	62	A	11.8849	1	956	956	311	A-A	light	test	A	A	testA-A	14	1082	354	1016	311	47
9	63	A	40.4011	1	3037	3037	394	A-A	light	test	A	A	testA-A	15	481	501	394	437	3
9	64	A	19.5256	1	957	957	250	A-A	light	test	A	A	testA-A	16	909	301	845	250	26
10	1	A	NA	0	timeout	20000	293	A-A	dark	learning	A	A	learning	1	NA	NA	1627	490	9
10	2	A	NA	0	timeout	20000	418	A-A	dark	learning	A	A	learning	2	NA	NA	1257	662	34
10	3	B	11.6726	1	1554	1554	399	A-A	dark	learning	A	A	learning	3	1215	701	1154	681	16
10	4	B	13.8293	1	1514	1514	451	A-A	dark	learning	A	A	learning	4	896	671	824	629	44
10	5	B	16.0078	1	3512	3512	123	A-A	dark	learning	A	A	learning	5	1468	167	1415	123	4
10	6	A	NA	0	timeout	20000	150	A-A	dark	learning	A	A	learning	6	NA	NA	350	930	33
10	7	A	NA	0	timeout	20000	238	A-A	dark	learning	A	A	learning	7	NA	NA	238	405	1
10	8	B	NA	0	timeout	20000	373	A-A	dark	learning	A	A	learning	8	NA	NA	506	707	25
10	9	A	20.8626	1	1770	1770	445	A-A	dark	learning	A	A	learning	9	568	681	490	635	39
10	10	B	13.4629	1	2281	2281	241	A-A	dark	learning	A	A	learning	10	918	284	848	241	14
10	11	A	NA	0	timeout	20000	416	A-A	dark	learning	A	A	learning	11	NA	NA	1504	426	45
10	12	B	1.5	1	9873	9873	535	A-A	dark	learning	A	A	learning	12	763	568	700	535	11
10	13	A	NA	0	timeout	20000	220	A-A	dark	learning	A	A	learning	13	NA	NA	1239	860	8
10	14	A	16.0078	1	15016	15016	425	A-A	dark	learning	A	A	learning	14	948	702	889	655	40
10	15	B	20.0562	1	17510	17510	357	A-A	dark	learning	A	A	learning	15	607	390	524	357	3
10	16	B	30.5491	1	5704	5704	256	A-A	dark	learning	A	A	learning	16	1205	316	1153	256	22
10	17	B	24.2745	1	10944	10944	181	A-A	dark	learning	A	A	learning	17	1068	233	1018	181	21
10	18	B	26.4622	1	2368	2368	234	A-A	dark	learning	A	A	learning	18	1428	290	1375	234	37
10	19	A	21.36	1	5497	5497	207	A-A	dark	learning	A	A	learning	19	1582	912	1499	873	10
10	20	A	NA	0	timeout	20000	505	A-A	dark	learning	A	A	learning	20	NA	NA	1398	505	29
10	21	B	7.6322	1	3207	3207	157	A-A	dark	learning	A	A	learning	21	708	182	649	157	57
10	22	A	NA	0	timeout	20000	297	A-A	dark	learning	A	A	learning	22	NA	NA	1623	535	31
10	23	B	19.0066	1	3710	3710	160	A-A	dark	learning	A	A	learning	23	1162	951	1080	920	38
10	24	A	NA	0	timeout	20000	475	A-A	dark	learning	A	A	learning	24	NA	NA	1434	475	47
10	25	A	25.005	1	8021	8021	186	A-A	dark	learning	A	A	learning	25	760	193	702	186	56
10	26	B	24.8646	1	9693	9693	274	A-A	dark	learning	A	A	learning	26	361	784	274	746	18
10	27	B	18.554	1	3205	3205	345	A-A	dark	learning	A	A	learning	27	1620	763	1575	727	36
10	28	A	20.8147	1	8570	8570	209	A-A	dark	learning	A	A	learning	28	291	515	209	475	43
10	29	B	32.3303	1	4008	4008	225	A-A	dark	learning	A	A	learning	29	1252	277	1214	225	28
10	31	B	19.7041	1	3934	3934	385	A-A	dark	learning	A	A	learning	31	1504	428	1457	385	35
10	32	A	27.5182	1	3438	3438	191	A-A	dark	learning	A	A	learning	32	622	250	558	191	17
10	33	A	25.3032	1	5638	5638	446	A-A	dark	search	A	A	searchA	1	702	465	617	446	53
10	34	A	11.5434	1	3146	3146	120	A-A	dark	search	A	A	searchA	2	237	148	163	120	54
10	35	A	24.3977	1	2281	2281	287	A-A	dark	search	A	A	searchA	3	1177	336	1097	287	47
10	36	A	NA	0	timeout	20000	352	A-A	dark	search	A	A	searchA	4	NA	NA	852	352	1
10	37	A	NA	0	timeout	20000	208	A-A	dark	search	A	A	searchA	5	NA	NA	829	208	12
10	38	A	NA	0	timeout	20000	114	A-A	dark	search	A	A	searchA	6	NA	NA	1657	114	55
10	39	A	33.6341	1	11145	11145	283	A-A	dark	search	A	A	searchA	7	1697	792	1637	727	24
10	40	A	NA	0	timeout	20000	236	A-A	dark	search	A	A	searchA	8	NA	NA	1156	844	5
10	41	A	15.4353	1	14187	14187	354	A-A	dark	search	A	A	searchA	9	431	492	354	454	49
10	42	A	NA	0	timeout	20000	294	A-A	dark	search	A	A	searchA	10	NA	NA	1084	294	11
10	43	A	25.224	1	2015	2015	156	A-A	dark	search	A	A	searchA	11	1129	212	1072	156	50
10	44	A	32.7605	1	5422	5422	324	A-A	dark	search	A	A	searchA	12	689	387	635	324	13
10	45	A	NA	0	timeout	20000	530	A-A	dark	search	A	A	searchA	13	NA	NA	665	550	6
10	46	A	NA	0	timeout	20000	254	A-A	dark	search	A	A	searchA	14	NA	NA	1308	254	39
10	47	A	NA	0	timeout	20000	444	A-A	dark	search	A	A	searchA	15	NA	NA	569	636	3
10	48	A	3.2016	1	2445	2445	434	A-A	dark	search	A	A	searchA	16	1527	675	1462	646	30
10	49	A	14.2215	1	12740	12740	168	A-A	dark	test	A	A	testA-A	1	245	568	168	534	37
10	50	A	31.5159	1	3334	3334	470	A-A	dark	test	A	A	testA-A	2	1157	673	1093	610	47
10	51	A	10.0125	1	6799	6799	229	A-A	dark	test	A	A	testA-A	3	1221	261	1148	229	33
10	52	A	19.4743	1	1667	1667	302	A-A	dark	test	A	A	testA-A	4	1254	343	1174	302	18
10	53	A	20.5973	1	1518	1518	332	A-A	dark	test	A	A	testA-A	5	772	384	711	332	19
10	54	A	11.6726	1	4830	4830	325	A-A	dark	test	A	A	testA-A	6	501	795	430	755	24
10	55	A	11.8849	1	9496	9496	285	A-A	dark	test	A	A	testA-A	7	1695	571	1635	551	3
10	56	A	19.9812	1	5599	5599	235	A-A	dark	test	A	A	testA-A	8	1635	277	1555	235	43
10	57	A	14.3962	1	1326	1326	404	A-A	dark	test	A	A	testA-A	9	970	449	902	404	17
10	58	A	8.5	1	4193	4193	276	A-A	dark	test	A	A	testA-A	10	1711	340	1644	301	44
10	59	A	24.4182	1	10264	10264	130	A-A	dark	test	A	A	testA-A	11	994	977	907	950	22
10	60	A	30.5164	1	1024	1024	448	A-A	dark	test	A	A	testA-A	12	1222	510	1160	448	48
10	61	A	21.7313	1	2509	2509	429	A-A	dark	test	A	A	testA-A	13	1016	674	933	651	49
10	62	A	31.1328	1	3728	3728	284	A-A	dark	test	A	A	testA-A	14	1221	300	1131	284	15
10	63	A	33.7676	1	15711	15711	481	A-A	dark	test	A	A	testA-A	15	1407	528	1314	481	13
10	64	A	11.8849	1	4436	4436	82	A-A	dark	test	A	A	testA-A	16	1664	118	1612	82	50
11	1	A	15.9138	1	15083	15083	372	A-A	light	learning	A	A	learning	1	446	528	372	485	52
11	2	B	13.4629	1	6066	6066	282	A-A	light	learning	A	A	learning	2	704	325	648	282	43
11	3	B	22.2991	1	4199	4199	251	A-A	light	learning	A	A	learning	3	329	797	251	749	53
11	4	A	9.0139	1	3393	3393	190	A-A	light	learning	A	A	learning	4	655	930	589	890	5
11	5	A	19.6023	1	7187	7187	167	A-A	light	learning	A	A	learning	5	1696	218	1635	167	6
11	6	B	15.0748	1	2709	2709	245	A-A	light	learning	A	A	learning	6	392	275	314	245	35
11	7	A	12.1758	1	11797	11797	274	A-A	light	learning	A	A	learning	7	1429	849	1370	806	30
11	8	B	18.7683	1	1391	1391	86	A-A	light	learning	A	A	learning	8	881	130	804	86	13
11	9	A	16.7705	1	3220	3220	160	A-A	light	learning	A	A	learning	9	627	208	567	160	11
11	10	B	14.5	1	1713	1713	525	A-A	light	learning	A	A	learning	10	1115	571	1052	525	56
11	11	A	32.1442	1	4781	4781	354	A-A	light	learning	A	A	learning	11	1101	766	1007	726	24
11	12	B	37.5533	1	1272	1272	179	A-A	light	learning	A	A	learning	12	295	970	234	901	32
11	13	B	32.73	1	8383	8383	172	A-A	light	learning	A	A	learning	13	262	709	172	659	46
11	14	A	16.3783	1	11843	11843	386	A-A	light	learning	A	A	learning	14	1572	426	1523	386	40
11	15	B	16.6208	1	4143	4143	89	A-A	light	learning	A	A	learning	15	1688	137	1627	89	41
11	16	A	43.4885	1	1947	1947	513	A-A	light	learning	A	A	learning	16	1057	568	1025	567	33
11	17	B	18.1728	1	2699	2699	382	A-A	light	learning	A	A	learning	17	1449	416	1404	382	31
11	18	A	14.7054	1	5834	5834	396	A-A	light	learning	A	A	learning	18	1021	724	946	684	23
11	19	B	32.1753	1	1122	1122	538	A-A	light	learning	A	A	learning	19	834	596	748	542	2
11	20	A	16.1012	1	1840	1840	233	A-A	light	learning	A	A	learning	20	997	279	941	233	3
11	21	B	4.272	1	1965	1965	339	A-A	light	learning	A	A	learning	21	884	774	817	741	36
11	22	A	25.8118	1	3807	3807	193	A-A	light	learning	A	A	learning	22	1094	243	1013	193	26
11	23	B	4.9244	1	1718	1718	390	A-A	light	learning	A	A	learning	23	1490	426	1429	390	17
11	24	A	3.6401	1	3723	3723	280	A-A	light	learning	A	A	learning	24	344	615	280	587	9
11	25	A	23.3077	1	3164	3164	74	A-A	light	learning	A	A	learning	25	1505	92	1461	74	25
11	26	A	22.2991	1	1593	1593	254	A-A	light	learning	A	A	learning	26	1559	302	1481	254	37
11	27	B	20.1556	1	1099	1099	453	A-A	light	learning	A	A	learning	27	945	673	896	627	29
11	28	B	11.6726	1	1282	1282	237	A-A	light	learning	A	A	learning	28	1319	280	1258	237	20
11	29	A	61.5	1	2641	2641	131	A-A	light	learning	A	A	learning	29	634	1042	571	949	54
11	30	A	23.9635	1	1293	1293	537	A-A	light	learning	A	A	learning	30	962	578	877	537	21
11	31	B	55.2472	1	958	958	491	A-A	light	learning	A	A	learning	31	676	672	593	589	39
11	32	B	28.9353	1	2361	2361	80	A-A	light	learning	A	A	learning	32	869	139	797	80	55
11	33	A	31.8002	1	1668	1668	525	A-A	light	search	A	A	searchA	1	1204	617	1132	555	55
11	34	A	8.1394	1	1012	1012	347	A-A	light	search	A	A	searchA	2	765	759	708	733	34
11	35	A	48.0026	1	7015	7015	161	A-A	light	search	A	A	searchA	3	1660	951	1645	919	51
11	36	A	27.0601	1	15761	15761	236	A-A	light	search	A	A	searchA	4	275	811	236	792	47
11	37	A	21.9146	1	1908	1908	262	A-A	light	search	A	A	searchA	5	1069	869	1016	818	19
11	38	A	28.0401	1	3619	3619	241	A-A	light	search	A	A	searchA	6	1223	283	1134	241	36
11	39	A	18.0624	1	1807	1807	268	A-A	light	search	A	A	searchA	7	718	845	673	812	44
11	40	A	29.9207	1	11917	11917	234	A-A	light	search	A	A	searchA	8	1386	295	1328	234	3
11	41	A	22.2991	1	10121	10121	323	A-A	light	search	A	A	searchA	9	1639	364	1597	325	20
11	42	A	22.2991	1	5437	5437	136	A-A	light	search	A	A	searchA	10	496	175	412	136	26
11	43	A	10.6888	1	11960	11960	513	A-A	light	search	A	A	searchA	11	1318	609	1257	567	27
11	44	A	32.73	1	845	845	478	A-A	light	search	A	A	searchA	12	1214	652	1178	602	17
11	45	A	27.0416	1	13116	13116	484	A-A	light	search	A	A	searchA	13	1178	653	1124	596	40
11	46	A	30.104	1	6019	6019	410	A-A	light	search	A	A	searchA	14	1344	724	1301	670	29
11	47	A	33.8711	1	1729	1729	408	A-A	light	search	A	A	searchA	15	1546	534	1512	485	48
11	48	A	43.8321	1	5865	5865	107	A-A	light	search	A	A	searchA	16	545	178	463	107	32
11	49	A	18.4459	1	1294	1294	484	A-A	light	test	A	A	testA-A	1	537	629	484	582	39
11	50	A	13.7931	1	8280	8280	473	A-A	light	test	A	A	testA-A	2	1212	648	1139	607	48
11	51	A	14.4309	1	1376	1376	464	A-A	light	test	A	A	testA-A	3	1203	651	1154	616	40
11	52	A	5.5902	1	1048	1048	528	A-A	light	test	A	A	testA-A	4	640	565	578	528	43
11	53	A	12.855	1	2128	2128	259	A-A	light	test	A	A	testA-A	5	474	303	414	259	31
11	54	A	50.2121	1	2952	2952	162	A-A	light	test	A	A	testA-A	6	1082	901	1032	918	35
11	55	A	NA	0	timeout	20000	306	A-A	light	test	A	A	testA-A	7	NA	NA	955	774	29
11	56	A	14.5344	1	2180	2180	335	A-A	light	test	A	A	testA-A	8	1500	381	1438	335	47
11	57	A	22.8528	1	1700	1700	249	A-A	light	test	A	A	testA-A	9	316	534	249	525	37
11	58	A	39.8152	1	1319	1319	225	A-A	light	test	A	A	testA-A	10	698	919	612	855	2
11	59	A	16.9779	1	2720	2720	247	A-A	light	test	A	A	testA-A	11	361	881	294	833	28
11	60	A	29.1076	1	6385	6385	178	A-A	light	test	A	A	testA-A	12	1697	931	1605	902	57
11	61	A	29.5169	1	1980	1980	179	A-A	light	test	A	A	testA-A	13	746	229	660	179	23
11	62	A	31.6425	1	3835	3835	442	A-A	light	test	A	A	testA-A	14	1296	505	1230	442	4
11	63	A	10.5	1	3573	3573	260	A-A	light	test	A	A	testA-A	15	1494	302	1431	260	21
11	64	A	40.6602	1	10241	10241	99	A-A	light	test	A	A	testA-A	16	1647	159	1613	99	12
12	1	A	23.2433	1	3310	3310	512	A-A	dark	learning	A	A	learning	1	908	551	823	512	46
12	2	A	NA	0	timeout	20000	170	A-A	dark	learning	A	A	learning	2	NA	NA	1283	910	23
12	3	B	17.5	1	2025	2025	488	A-A	dark	learning	A	A	learning	3	551	578	488	529	47
12	4	B	44.9806	1	1820	1820	315	A-A	dark	learning	A	A	learning	4	419	493	315	443	35
12	5	B	24.1506	1	4420	4420	232	A-A	dark	learning	A	A	learning	5	306	755	232	702	6
12	6	A	12.2984	1	2586	2586	384	A-A	dark	learning	A	A	learning	6	1146	733	1094	696	45
12	7	B	26.7442	1	1993	1993	192	A-A	dark	learning	A	A	learning	7	651	929	563	888	15
12	8	A	9.5525	1	2631	2631	379	A-A	dark	learning	A	A	learning	8	523	742	459	701	31
12	9	B	27.0416	1	3413	3413	309	A-A	dark	learning	A	A	learning	9	1678	366	1606	309	32
12	10	A	14.6031	1	4957	4957	180	A-A	dark	learning	A	A	learning	10	515	223	461	180	19
12	11	A	15.6924	1	3493	3493	268	A-A	dark	learning	A	A	learning	11	1721	702	1652	656	5
12	12	B	9.3408	1	3811	3811	443	A-A	dark	learning	A	A	learning	12	1251	671	1197	637	29
12	13	B	30.7774	1	1639	1639	274	A-A	dark	learning	A	A	learning	13	710	328	626	274	20
12	14	B	6.7268	1	3694	3694	101	A-A	dark	learning	A	A	learning	14	422	137	354	101	4
12	15	A	3.6401	1	2155	2155	355	A-A	dark	learning	A	A	learning	15	1206	760	1142	725	30
12	16	A	17.9513	1	2972	2972	208	A-A	dark	learning	A	A	learning	16	275	592	208	543	51
12	17	A	8.7321	1	8080	8080	281	A-A	dark	learning	A	A	learning	17	1458	839	1393	799	18
12	18	B	19.1377	1	8859	8859	331	A-A	dark	learning	A	A	learning	18	966	787	885	749	25
12	19	B	13.4629	1	5172	5172	320	A-A	dark	learning	A	A	learning	19	1309	803	1253	760	9
12	20	A	1.118	1	1899	1899	428	A-A	dark	learning	A	A	learning	20	495	684	433	652	3
12	21	B	22.809	1	1289	1289	431	A-A	dark	learning	A	A	learning	21	1000	483	927	431	8
12	22	A	NA	0	timeout	20000	127	A-A	dark	learning	A	A	learning	22	NA	NA	1614	953	26
12	23	A	7.5664	1	1492	1492	446	A-A	dark	learning	A	A	learning	23	734	485	670	446	34
12	24	B	13.8654	1	4182	4182	173	A-A	dark	learning	A	A	learning	24	242	238	173	194	42
12	25	B	9.9624	1	6042	6042	192	A-A	dark	learning	A	A	learning	25	645	929	585	888	39
12	26	B	3.6401	1	1765	1765	268	A-A	dark	learning	A	A	learning	26	768	847	706	812	44
12	27	A	21.5232	1	2328	2328	297	A-A	dark	learning	A	A	learning	27	371	405	297	355	12
12	28	A	NA	0	timeout	20000	188	A-A	dark	learning	A	A	learning	28	NA	NA	918	892	7
12	29	B	9.3941	1	1825	1825	446	A-A	dark	learning	A	A	learning	29	676	486	617	446	36
12	30	B	14.7733	1	3937	3937	324	A-A	dark	learning	A	A	learning	30	1509	369	1452	324	54
12	31	A	16.5605	1	5717	5717	271	A-A	dark	learning	A	A	learning	31	1389	317	1318	271	33
12	32	A	8.5	1	11483	11483	239	A-A	dark	learning	A	A	learning	32	364	278	305	239	16
12	33	A	20.7183	1	5734	5734	471	A-A	dark	search	A	A	searchA	1	1314	523	1248	471	53
12	34	A	9.5525	1	3754	3754	281	A-A	dark	search	A	A	searchA	2	1432	824	1376	799	42
12	35	A	6.0208	1	18583	18583	526	A-A	dark	search	A	A	searchA	3	998	585	941	554	51
12	36	A	25.6759	1	8195	8195	164	A-A	dark	search	A	A	searchA	4	224	595	164	538	34
12	37	A	16.8003	1	9033	9033	519	A-A	dark	search	A	A	searchA	5	862	564	809	519	14
12	38	A	NA	0	timeout	20000	496	A-A	dark	search	A	A	searchA	6	NA	NA	524	584	41
12	39	A	15.0416	1	19753	19753	458	A-A	dark	search	A	A	searchA	7	1335	668	1276	622	40
[truncated: 6,932 more rows]
